# Supplementary material
Source: publisher figshare collection journal article supplement (https://acs.figshare.com/ndownloader/files/8583850)
Supplement: Supplementary file 1 [file 8583850]

data_global
_audit_creation_date                               2017-04-17
_audit_creation_method                            'by CrystalStructure 4.2'
_audit_update_record                               ?

#==============================================================================
# PROCESSING SUMMARY (IUCr Office Use Only)

_journal_date_recd_electronic                      ?
_journal_date_from_coeditor                        ?
_journal_date_accepted                             ?
_journal_coeditor_code                             ?

#==============================================================================
# SUBMISSION DETAILS

_publ_contact_author_name                         'Morifumi Fujita'
_publ_contact_author_email                        'fuji@sci.u-hyogo.ac.jp'
_publ_contact_author_fax                          'ENTER FAX NUMBER'
_publ_contact_author_phone                        'ENTER PHONE NUMBER'
_publ_contact_letter
;
    ENTER TEXT OF LETTER
;
_publ_requested_journal                           'ENTER JOURNAL NAME HERE'
_publ_requested_category
                                                  'FO'
_publ_requested_coeditor_name                      ?

#==============================================================================
# TITLE AND AUTHOR LIST

_publ_section_title
;
    ENTER SECTION TITLE
;
_publ_section_title_footnote
;
    ENTER FOOTNOTE TO TITLE OF PAPER
;
loop_
_publ_author_name
_publ_author_footnote
_publ_author_address
' FIRST AUTHORS NAME '
;
  FIRST AUTHORS FOOTNOTES
;
;
  FIRST AUTHORS ADDRESS
;
_publ_section_synopsis
;
    ENTER SYNOPSIS
;

#==============================================================================
# TEXT

_publ_section_abstract
;
    ENTER ABSTRACT
;
_publ_section_comment
;
    ENTER TEXT
;
_publ_section_references
;
    ENTER OTHER REFERENCES

    Rigaku (2015). CrystalStructure. Version 4.2. 
    Rigaku Corporation, Tokyo, Japan.

    Burla, M. C., Caliandro, R., Camalli, M., Carrozzini, B., 
    Cascarano, G. L., Giacovazzo, C., Mallamo, M., Mazzone, A., 
    Polidori, G. and Spagna, R. 
    (2012). J. Appl. Cryst. 45, 357-361.
    SIR2011

    Sheldrick, G.M. (2008) SHELXL Version 2013/4, Acta Cryst. A64, 112-122.

    Rigaku (1995). ABSCOR. 
    Rigaku Corporation, Tokyo, Japan.

;
_publ_section_figure_captions
;
    ENTER FIGURE CAPTIONS
;
_publ_section_exptl_prep
;
    ENTER COMPOUND PREPARATION DETAILS
;
_publ_section_exptl_refinement
;
    ENTER SPECIAL DETAILS OF THE REFINEMENT
;

#==============================================================================
data_M170417A

#==============================================================================
# CHEMICAL DATA

_chemical_formula_sum                             'C25 H22 O4'
_chemical_formula_moiety                          'C25 H22 O4'
_chemical_formula_weight                           386.45
_chemical_melting_point                            ?

#==============================================================================
# CRYSTAL DATA
_space_group_crystal_system                        monoclinic
_space_group_name_H-M_alt                         'P 1 21/n 1'
_space_group_name_Hall                            '-P 2yn'
_space_group_IT_number                             14
loop_
_space_group_symop_id
_space_group_symop_operation_xyz
1   '+X,+Y,+Z'
2   '1/2-X,1/2+Y,1/2-Z'
3   '-X,-Y,-Z'
4   '-1/2+X,-1/2-Y,-1/2+Z'
#------------------------------------------------------------------------------
_cell_length_a                                     14.2906(7)
_cell_length_b                                     5.9928(4)
_cell_length_c                                     22.8149(12)
_cell_angle_alpha                                  90.0000
_cell_angle_beta                                   93.389(7)
_cell_angle_gamma                                  90.0000
_cell_volume                                       1950.46(19)
_cell_formula_units_Z                              4
_cell_measurement_reflns_used                      11970
_cell_measurement_theta_min                        3.04
_cell_measurement_theta_max                        27.45
_cell_measurement_temperature                      150
#------------------------------------------------------------------------------
_exptl_crystal_description                         needle
_exptl_crystal_colour                              colorless
_exptl_crystal_size_max                            0.600
_exptl_crystal_size_mid                            0.100
_exptl_crystal_size_min                            0.050
_exptl_crystal_density_diffrn                      1.316
_exptl_crystal_density_meas                        ?
_exptl_crystal_density_method                     'not measured'
_exptl_crystal_F_000                               816.00
_exptl_absorpt_coefficient_mu                      0.088
_exptl_absorpt_correction_type                     multi-scan
_exptl_absorpt_process_details                    'ABSCOR (Rigaku, 1995)'
_exptl_absorpt_correction_T_min                    0.493
_exptl_absorpt_correction_T_max                    0.996

#==============================================================================
# EXPERIMENTAL DATA

_diffrn_ambient_temperature                        150
_diffrn_radiation_type                            'Mo K\a'
_diffrn_radiation_wavelength                       0.71075
_diffrn_measurement_device_type                   'Rigaku R-AXIS RAPID'
_diffrn_measurement_method                         \w
_diffrn_detector_area_resol_mean                   10.000
_diffrn_reflns_number                              17861
_diffrn_reflns_av_R_equivalents                    0.0557
_diffrn_reflns_theta_max                           27.459
_diffrn_reflns_theta_min                           3.113
_diffrn_reflns_theta_full                          25.242
_diffrn_measured_fraction_theta_max                0.998
_diffrn_measured_fraction_theta_full               0.999
_diffrn_reflns_Laue_measured_fraction_max          0.998
_diffrn_reflns_Laue_measured_fraction_full         0.999
_diffrn_reflns_point_group_measured_fraction_max   0.998
_diffrn_reflns_point_group_measured_fraction_full  0.999
_diffrn_reflns_limit_h_min                        -15
_diffrn_reflns_limit_h_max                         18
_diffrn_reflns_limit_k_min                        -7
_diffrn_reflns_limit_k_max                         7
_diffrn_reflns_limit_l_min                        -29
_diffrn_reflns_limit_l_max                         27
_diffrn_standards_number                           0
_diffrn_standards_interval_count                   .
_diffrn_standards_decay_%                          ?
_reflns_number_total                               4448
_reflns_number_gt                                  3111
_reflns_threshold_expression                       F^2^>2.0\s(F^2^)
_reflns_Friedel_coverage          0.000
_reflns_Friedel_fraction_max      .
_reflns_Friedel_fraction_full     .

#==============================================================================
# REFINEMENT DATA

_refine_special_details
;
    Refinement was performed using all reflections. The weighted 
    R-factor (wR) and goodness of fit (S) are based on F^2^.
    R-factor (gt) are based on F. The threshold expression of
    F^2^ > 2.0 sigma(F^2^) is used only for calculating R-factor (gt).
;
_refine_ls_structure_factor_coef                   Fsqd
_refine_ls_R_factor_all                            0.0874
_refine_ls_R_factor_gt                             0.0572
_refine_ls_wR_factor_ref                           0.1455
_refine_ls_wR_factor_gt                            0.1348
_refine_ls_number_restraints                       0
_refine_ls_hydrogen_treatment                      constr
_refine_ls_number_reflns                           4448
_refine_ls_number_parameters                       262
_refine_ls_goodness_of_fit_ref                     1.092
_refine_ls_weighting_scheme                        calc
_refine_ls_weighting_details
           'w = 1/[\s^2^(Fo^2^)+(0.0350P)^2^+1.8420P] where P=(Fo^2^+2Fc^2^)/3'
_atom_sites_solution_hydrogens                     geom
_atom_sites_solution_primary                       direct
_atom_sites_solution_secondary                     difmap
_refine_ls_shift/su_max                            0.000
_refine_diff_density_max                           0.25
_refine_diff_density_min                          -0.22
_refine_ls_extinction_method                       none
_refine_ls_extinction_coef                         ?

loop_
_atom_type_symbol
_atom_type_description
_atom_type_scat_dispersion_real
_atom_type_scat_dispersion_imag
_atom_type_scat_source
  'C' 'C'  0.0033 0.0016 
;
International Tables for Crystallography
(Vol. C, Tables 4.2.6.8 and 6.1.1.4)
;
  'H' 'H'  0.0000 0.0000 
;
International Tables for Crystallography
(Vol. C, Table 6.1.1.4)
;
  'O' 'O'  0.0106 0.0060 
;
International Tables for Crystallography
(Vol. C, Tables 4.2.6.8 and 6.1.1.4)
;

#==============================================================================
# ATOMIC COORDINATES AND THERMAL PARAMETERS

loop_
 _atom_site_label
 _atom_site_type_symbol
 _atom_site_fract_x
 _atom_site_fract_y
 _atom_site_fract_z
 _atom_site_U_iso_or_equiv
 _atom_site_adp_type
 _atom_site_occupancy
 _atom_site_site_symmetry_order  
 _atom_site_calc_flag
 _atom_site_refinement_flags_posn
 _atom_site_refinement_flags_adp
 _atom_site_refinement_flags_occupancy
 _atom_site_disorder_assembly
 _atom_site_disorder_group
O1 O 0.18218(10) 0.6321(3) -0.03376(6) 0.0305(4) Uani 1 1 d . . . . .
O2 O 0.15729(12) 0.2810(3) -0.06745(7) 0.0389(4) Uani 1 1 d . . . . .
O3 O 0.35928(11) 0.8159(3) 0.00396(6) 0.0317(4) Uani 1 1 d . . . . .
O4 O 0.39120(12) 0.4601(3) 0.03120(7) 0.0390(4) Uani 1 1 d . . . . .
C1 C 0.33492(18) 0.4511(5) -0.25138(10) 0.0395(6) Uani 1 1 d . . . . .
H1 H 0.3112 0.3336 -0.2759 0.047 Uiso 1 1 calc R U . . .
C2 C 0.38942(17) 0.6189(5) -0.27410(10) 0.0407(6) Uani 1 1 d . . . . .
H2 H 0.4022 0.6185 -0.3145 0.049 Uiso 1 1 calc R U . . .
C3 C 0.31554(16) 0.4569(4) -0.19249(10) 0.0331(5) Uani 1 1 d . . . . .
H3 H 0.2779 0.3429 -0.1771 0.040 Uiso 1 1 calc R U . . .
C4 C 0.42467(17) 0.7856(5) -0.23765(11) 0.0382(6) Uani 1 1 d . . . . .
H4 H 0.4626 0.8984 -0.2533 0.046 Uiso 1 1 calc R U . . .
C5 C 0.35028(14) 0.6273(4) -0.15540(9) 0.0267(5) Uani 1 1 d . . . . .
C6 C 0.40620(15) 0.7937(4) -0.17809(10) 0.0298(5) Uani 1 1 d . . . . .
C7 C 0.32329(14) 0.6262(4) -0.09163(9) 0.0257(5) Uani 1 1 d . . . . .
H7 H 0.3302 0.4701 -0.0765 0.031 Uiso 1 1 calc R U . . .
C8 C 0.44970(16) 0.9755(4) -0.13963(10) 0.0360(6) Uani 1 1 d . . . . .
H8A H 0.4456 1.1187 -0.1613 0.043 Uiso 1 1 calc R U . . .
H8B H 0.5169 0.9413 -0.1311 0.043 Uiso 1 1 calc R U . . .
C9 C 0.39122(15) 0.7751(4) -0.05466(9) 0.0291(5) Uani 1 1 d . . . . .
H9 H 0.4539 0.7004 -0.0508 0.035 Uiso 1 1 calc R U . . .
C10 C 0.40259(17) 1.0018(4) -0.08192(10) 0.0331(5) Uani 1 1 d . . . . .
H10A H 0.4413 1.0983 -0.0549 0.040 Uiso 1 1 calc R U . . .
H10B H 0.3405 1.0731 -0.0891 0.040 Uiso 1 1 calc R U . . .
C11 C 0.22007(15) 0.6932(4) -0.08915(9) 0.0298(5) Uani 1 1 d . . . . .
H11A H 0.2142 0.8566 -0.0948 0.036 Uiso 1 1 calc R U . . .
H11B H 0.1830 0.6194 -0.1217 0.036 Uiso 1 1 calc R U . . .
C12 C 0.15348(14) 0.4194(4) -0.02905(9) 0.0289(5) Uani 1 1 d . . . . .
C13 C 0.11483(14) 0.3766(4) 0.02953(9) 0.0279(5) Uani 1 1 d . . . . .
C14 C 0.07991(16) 0.1656(4) 0.04043(10) 0.0342(5) Uani 1 1 d . . . . .
H14 H 0.0841 0.0507 0.0120 0.041 Uiso 1 1 calc R U . . .
C15 C 0.03872(17) 0.1222(5) 0.09298(11) 0.0387(6) Uani 1 1 d . . . . .
H15 H 0.0127 -0.0206 0.0999 0.046 Uiso 1 1 calc R U . . .
C16 C 0.03563(16) 0.2875(5) 0.13530(10) 0.0373(6) Uani 1 1 d . . . . .
H16 H 0.0079 0.2575 0.1713 0.045 Uiso 1 1 calc R U . . .
C17 C 0.07279(17) 0.4960(5) 0.12528(10) 0.0378(6) Uani 1 1 d . . . . .
H17 H 0.0715 0.6083 0.1546 0.045 Uiso 1 1 calc R U . . .
C18 C 0.11206(16) 0.5413(4) 0.07219(10) 0.0333(5) Uani 1 1 d . . . . .
H18 H 0.1370 0.6852 0.0651 0.040 Uiso 1 1 calc R U . . .
C19 C 0.36734(15) 0.6480(4) 0.04299(10) 0.0303(5) Uani 1 1 d . . . . .
C20 C 0.34544(15) 0.7241(4) 0.10289(10) 0.0307(5) Uani 1 1 d . . . . .
C21 C 0.37355(16) 0.5895(5) 0.15034(10) 0.0367(6) Uani 1 1 d . . . . .
H21 H 0.4022 0.4492 0.1439 0.044 Uiso 1 1 calc R U . . .
C22 C 0.35989(18) 0.6597(5) 0.20697(11) 0.0426(6) Uani 1 1 d . . . . .
H22 H 0.3801 0.5690 0.2394 0.051 Uiso 1 1 calc R U . . .
C23 C 0.31673(18) 0.8622(5) 0.21620(11) 0.0430(7) Uani 1 1 d . . . . .
H23 H 0.3072 0.9102 0.2551 0.052 Uiso 1 1 calc R U . . .
C24 C 0.28727(17) 0.9956(5) 0.16897(11) 0.0400(6) Uani 1 1 d . . . . .
H24 H 0.2565 1.1332 0.1755 0.048 Uiso 1 1 calc R U . . .
C25 C 0.30268(16) 0.9283(4) 0.11221(10) 0.0346(6) Uani 1 1 d . . . . .
H25 H 0.2841 1.0212 0.0799 0.042 Uiso 1 1 calc R U . . .

loop_
 _atom_site_aniso_label
 _atom_site_aniso_U_11
 _atom_site_aniso_U_22
 _atom_site_aniso_U_33
 _atom_site_aniso_U_23
 _atom_site_aniso_U_13
 _atom_site_aniso_U_12
O1 0.0332(8) 0.0316(9) 0.0275(8) 0.0015(7) 0.0080(6) -0.0013(7)
O2 0.0480(10) 0.0381(11) 0.0314(9) -0.0057(8) 0.0105(7) -0.0075(8)
O3 0.0410(9) 0.0282(10) 0.0255(8) -0.0032(7) -0.0007(6) 0.0027(7)
O4 0.0461(10) 0.0354(11) 0.0351(9) -0.0004(8) 0.0001(7) 0.0074(8)
C1 0.0449(14) 0.0415(16) 0.0319(13) -0.0084(11) 0.0010(10) 0.0033(12)
C2 0.0411(14) 0.0539(18) 0.0280(12) -0.0031(12) 0.0085(10) 0.0085(12)
C3 0.0349(12) 0.0334(14) 0.0311(12) -0.0022(10) 0.0013(9) -0.0013(10)
C4 0.0353(13) 0.0420(16) 0.0386(14) 0.0055(12) 0.0132(10) 0.0031(11)
C5 0.0245(11) 0.0287(13) 0.0268(11) -0.0003(9) 0.0012(8) 0.0025(9)
C6 0.0255(11) 0.0308(13) 0.0334(12) 0.0012(10) 0.0041(9) 0.0039(10)
C7 0.0283(11) 0.0236(12) 0.0252(11) 0.0009(9) 0.0014(8) 0.0003(9)
C8 0.0329(12) 0.0327(14) 0.0429(14) 0.0006(11) 0.0068(10) -0.0068(10)
C9 0.0286(11) 0.0327(14) 0.0258(11) -0.0031(9) 0.0012(8) 0.0010(10)
C10 0.0362(13) 0.0263(13) 0.0364(13) -0.0034(10) -0.0001(9) -0.0037(10)
C11 0.0296(11) 0.0338(14) 0.0265(11) 0.0065(10) 0.0053(8) -0.0003(10)
C12 0.0251(11) 0.0317(14) 0.0299(12) 0.0006(10) 0.0023(8) 0.0000(9)
C13 0.0224(10) 0.0341(13) 0.0271(11) 0.0014(9) 0.0018(8) -0.0010(9)
C14 0.0372(13) 0.0339(15) 0.0319(12) -0.0014(10) 0.0053(9) -0.0021(11)
C15 0.0419(14) 0.0348(15) 0.0402(14) 0.0061(11) 0.0095(10) -0.0047(11)
C16 0.0365(13) 0.0467(17) 0.0293(12) 0.0065(11) 0.0086(10) -0.0004(12)
C17 0.0421(14) 0.0419(16) 0.0299(12) -0.0030(11) 0.0066(10) 0.0004(12)
C18 0.0339(12) 0.0331(14) 0.0334(12) -0.0006(10) 0.0059(9) -0.0040(10)
C19 0.0263(11) 0.0316(14) 0.0323(12) -0.0021(10) -0.0043(9) 0.0006(10)
C20 0.0252(11) 0.0370(14) 0.0295(12) -0.0028(10) -0.0019(8) -0.0048(10)
C21 0.0337(13) 0.0418(16) 0.0346(13) 0.0028(11) 0.0009(9) -0.0017(11)
C22 0.0471(15) 0.0490(18) 0.0319(13) 0.0067(12) 0.0042(10) -0.0041(13)
C23 0.0455(15) 0.0531(18) 0.0312(13) -0.0056(12) 0.0097(10) -0.0077(13)
C24 0.0381(13) 0.0433(17) 0.0393(14) -0.0070(12) 0.0091(10) 0.0006(12)
C25 0.0312(12) 0.0392(16) 0.0331(12) -0.0014(11) -0.0006(9) 0.0003(11)

#==============================================================================
_computing_data_collection                        'RAPID AUTO (Rigaku, ????)'
_computing_cell_refinement                        'RAPID AUTO'
_computing_data_reduction                         'RAPID AUTO'
_computing_structure_solution
                                                'SIR2011 (Burla, et al., 2012)'
_computing_structure_refinement
                                      'SHELXL Version 2013/4 (Sheldrick, 2008)'
_computing_publication_material
                                          'CrystalStructure 4.2 (Rigaku, 2015)'
_computing_molecular_graphics                     'Mercury'

#==============================================================================
# MOLECULAR GEOMETRY

_geom_special_details
;
 All esds (except the esd in the dihedral angle between two l.s. planes)
 are estimated using the full covariance matrix.  The cell esds are taken
 into account individually in the estimation of esds in distances, angles
 and torsion angles; correlations between esds in cell parameters are only
 used when they are defined by crystal symmetry.  An approximate (isotropic)
 treatment of cell esds is used for estimating esds involving l.s. planes.
;

loop_
 _geom_bond_atom_site_label_1
 _geom_bond_atom_site_label_2
 _geom_bond_distance
 _geom_bond_site_symmetry_2
 _geom_bond_publ_flag
O1 C12 1.345(3) . ?
O1 C11 1.451(2) . ?
O2 C12 1.210(3) . ?
O3 C19 1.344(3) . ?
O3 C9 1.459(3) . ?
O4 C19 1.212(3) . ?
C1 C3 1.388(3) . ?
C1 C2 1.391(4) . ?
C1 H1 0.9500 . ?
C2 C4 1.376(4) . ?
C2 H2 0.9500 . ?
C3 C5 1.398(3) . ?
C3 H3 0.9500 . ?
C4 C6 1.400(3) . ?
C4 H4 0.9500 . ?
C5 C6 1.396(3) . ?
C5 C7 1.527(3) . ?
C6 C8 1.510(3) . ?
C7 C11 1.533(3) . ?
C7 C9 1.534(3) . ?
C7 H7 1.0000 . ?
C8 C10 1.522(3) . ?
C8 H8A 0.9900 . ?
C8 H8B 0.9900 . ?
C9 C10 1.507(3) . ?
C9 H9 1.0000 . ?
C10 H10A 0.9900 . ?
C10 H10B 0.9900 . ?
C11 H11A 0.9900 . ?
C11 H11B 0.9900 . ?
C12 C13 1.498(3) . ?
C13 C14 1.387(3) . ?
C13 C18 1.389(3) . ?
C14 C15 1.391(3) . ?
C14 H14 0.9500 . ?
C15 C16 1.386(4) . ?
C15 H15 0.9500 . ?
C16 C17 1.382(4) . ?
C16 H16 0.9500 . ?
C17 C18 1.391(3) . ?
C17 H17 0.9500 . ?
C18 H18 0.9500 . ?
C19 C20 1.491(3) . ?
C20 C25 1.390(3) . ?
C20 C21 1.390(3) . ?
C21 C22 1.384(3) . ?
C21 H21 0.9500 . ?
C22 C23 1.383(4) . ?
C22 H22 0.9500 . ?
C23 C24 1.387(4) . ?
C23 H23 0.9500 . ?
C24 C25 1.386(3) . ?
C24 H24 0.9500 . ?
C25 H25 0.9500 . ?

loop_
 _geom_angle_atom_site_label_1
 _geom_angle_atom_site_label_2
 _geom_angle_atom_site_label_3
 _geom_angle
 _geom_angle_site_symmetry_1
 _geom_angle_site_symmetry_3
 _geom_angle_publ_flag
C12 O1 C11 116.11(18) . . ?
C19 O3 C9 117.55(18) . . ?
C3 C1 C2 119.4(2) . . ?
C3 C1 H1 120.3 . . ?
C2 C1 H1 120.3 . . ?
C4 C2 C1 119.5(2) . . ?
C4 C2 H2 120.2 . . ?
C1 C2 H2 120.2 . . ?
C1 C3 C5 121.3(2) . . ?
C1 C3 H3 119.3 . . ?
C5 C3 H3 119.3 . . ?
C2 C4 C6 121.9(2) . . ?
C2 C4 H4 119.1 . . ?
C6 C4 H4 119.1 . . ?
C6 C5 C3 119.2(2) . . ?
C6 C5 C7 122.6(2) . . ?
C3 C5 C7 118.2(2) . . ?
C5 C6 C4 118.7(2) . . ?
C5 C6 C8 121.7(2) . . ?
C4 C6 C8 119.6(2) . . ?
C5 C7 C11 109.37(17) . . ?
C5 C7 C9 109.51(17) . . ?
C11 C7 C9 113.96(19) . . ?
C5 C7 H7 107.9 . . ?
C11 C7 H7 107.9 . . ?
C9 C7 H7 107.9 . . ?
C6 C8 C10 112.92(19) . . ?
C6 C8 H8A 109.0 . . ?
C10 C8 H8A 109.0 . . ?
C6 C8 H8B 109.0 . . ?
C10 C8 H8B 109.0 . . ?
H8A C8 H8B 107.8 . . ?
O3 C9 C10 105.92(18) . . ?
O3 C9 C7 112.30(17) . . ?
C10 C9 C7 112.20(18) . . ?
O3 C9 H9 108.8 . . ?
C10 C9 H9 108.8 . . ?
C7 C9 H9 108.8 . . ?
C9 C10 C8 109.1(2) . . ?
C9 C10 H10A 109.9 . . ?
C8 C10 H10A 109.9 . . ?
C9 C10 H10B 109.9 . . ?
C8 C10 H10B 109.9 . . ?
H10A C10 H10B 108.3 . . ?
O1 C11 C7 112.04(17) . . ?
O1 C11 H11A 109.2 . . ?
C7 C11 H11A 109.2 . . ?
O1 C11 H11B 109.2 . . ?
C7 C11 H11B 109.2 . . ?
H11A C11 H11B 107.9 . . ?
O2 C12 O1 124.4(2) . . ?
O2 C12 C13 124.3(2) . . ?
O1 C12 C13 111.34(19) . . ?
C14 C13 C18 119.8(2) . . ?
C14 C13 C12 118.1(2) . . ?
C18 C13 C12 122.1(2) . . ?
C13 C14 C15 120.0(2) . . ?
C13 C14 H14 120.0 . . ?
C15 C14 H14 120.0 . . ?
C16 C15 C14 120.0(2) . . ?
C16 C15 H15 120.0 . . ?
C14 C15 H15 120.0 . . ?
C17 C16 C15 120.2(2) . . ?
C17 C16 H16 119.9 . . ?
C15 C16 H16 119.9 . . ?
C16 C17 C18 120.0(2) . . ?
C16 C17 H17 120.0 . . ?
C18 C17 H17 120.0 . . ?
C13 C18 C17 120.1(2) . . ?
C13 C18 H18 120.0 . . ?
C17 C18 H18 120.0 . . ?
O4 C19 O3 124.3(2) . . ?
O4 C19 C20 124.4(2) . . ?
O3 C19 C20 111.3(2) . . ?
C25 C20 C21 120.1(2) . . ?
C25 C20 C19 121.8(2) . . ?
C21 C20 C19 118.0(2) . . ?
C22 C21 C20 120.0(3) . . ?
C22 C21 H21 120.0 . . ?
C20 C21 H21 120.0 . . ?
C23 C22 C21 119.9(3) . . ?
C23 C22 H22 120.1 . . ?
C21 C22 H22 120.1 . . ?
C22 C23 C24 120.3(2) . . ?
C22 C23 H23 119.8 . . ?
C24 C23 H23 119.8 . . ?
C25 C24 C23 120.0(3) . . ?
C25 C24 H24 120.0 . . ?
C23 C24 H24 120.0 . . ?
C24 C25 C20 119.7(2) . . ?
C24 C25 H25 120.2 . . ?
C20 C25 H25 120.2 . . ?

loop_
 _geom_torsion_atom_site_label_1
 _geom_torsion_atom_site_label_2
 _geom_torsion_atom_site_label_3
 _geom_torsion_atom_site_label_4
 _geom_torsion
 _geom_torsion_site_symmetry_1
 _geom_torsion_site_symmetry_2
 _geom_torsion_site_symmetry_3
 _geom_torsion_site_symmetry_4
 _geom_torsion_publ_flag
C3 C1 C2 C4 1.2(4) . . . . ?
C2 C1 C3 C5 -0.5(4) . . . . ?
C1 C2 C4 C6 -0.9(4) . . . . ?
C1 C3 C5 C6 -0.5(3) . . . . ?
C1 C3 C5 C7 178.1(2) . . . . ?
C3 C5 C6 C4 0.8(3) . . . . ?
C7 C5 C6 C4 -177.8(2) . . . . ?
C3 C5 C6 C8 -176.9(2) . . . . ?
C7 C5 C6 C8 4.5(3) . . . . ?
C2 C4 C6 C5 -0.1(4) . . . . ?
C2 C4 C6 C8 177.7(2) . . . . ?
C6 C5 C7 C11 106.1(2) . . . . ?
C3 C5 C7 C11 -72.4(3) . . . . ?
C6 C5 C7 C9 -19.4(3) . . . . ?
C3 C5 C7 C9 162.0(2) . . . . ?
C5 C6 C8 C10 -18.5(3) . . . . ?
C4 C6 C8 C10 163.8(2) . . . . ?
C19 O3 C9 C10 -162.77(18) . . . . ?
C19 O3 C9 C7 74.4(2) . . . . ?
C5 C7 C9 O3 169.01(18) . . . . ?
C11 C7 C9 O3 46.2(3) . . . . ?
C5 C7 C9 C10 49.8(2) . . . . ?
C11 C7 C9 C10 -73.0(2) . . . . ?
O3 C9 C10 C8 171.57(17) . . . . ?
C7 C9 C10 C8 -65.6(2) . . . . ?
C6 C8 C10 C9 47.4(3) . . . . ?
C12 O1 C11 C7 -82.3(2) . . . . ?
C5 C7 C11 O1 162.67(19) . . . . ?
C9 C7 C11 O1 -74.4(2) . . . . ?
C11 O1 C12 O2 -0.2(3) . . . . ?
C11 O1 C12 C13 -179.34(17) . . . . ?
O2 C12 C13 C14 -0.9(3) . . . . ?
O1 C12 C13 C14 178.27(19) . . . . ?
O2 C12 C13 C18 180.0(2) . . . . ?
O1 C12 C13 C18 -0.9(3) . . . . ?
C18 C13 C14 C15 2.7(3) . . . . ?
C12 C13 C14 C15 -176.5(2) . . . . ?
C13 C14 C15 C16 -2.3(4) . . . . ?
C14 C15 C16 C17 0.4(4) . . . . ?
C15 C16 C17 C18 1.1(4) . . . . ?
C14 C13 C18 C17 -1.2(3) . . . . ?
C12 C13 C18 C17 177.9(2) . . . . ?
C16 C17 C18 C13 -0.7(4) . . . . ?
C9 O3 C19 O4 -7.0(3) . . . . ?
C9 O3 C19 C20 171.55(17) . . . . ?
O4 C19 C20 C25 -168.3(2) . . . . ?
O3 C19 C20 C25 13.1(3) . . . . ?
O4 C19 C20 C21 15.0(3) . . . . ?
O3 C19 C20 C21 -163.6(2) . . . . ?
C25 C20 C21 C22 -0.7(3) . . . . ?
C19 C20 C21 C22 176.0(2) . . . . ?
C20 C21 C22 C23 1.1(4) . . . . ?
C21 C22 C23 C24 -0.2(4) . . . . ?
C22 C23 C24 C25 -1.3(4) . . . . ?
C23 C24 C25 C20 1.7(4) . . . . ?
C21 C20 C25 C24 -0.7(3) . . . . ?
C19 C20 C25 C24 -177.3(2) . . . . ?

#==============================================================================

#==============================================================================
# Additional structures and associated data_? identifiers
# should be added at this point if there is more than one 
# structure analysis in the CIF.

_shelxl_version_number 2013-4

_shelx_res_file
;
TITL M170417A
CELL  0.71075 14.29056 5.99282 22.81485 90.00000 93.38920 90.00000
ZERR  4 0.00073 0.00039 0.00121 0.00000 0.00660 0.00000
LATT 1
SYMM .50-X, .50+Y, .50-Z
SFAC C H O
UNIT 100 88 16
SHEL 6.790236 0.769625
L.S. 5
FMAP 2
PLAN 36
WPDB -2
HTAB
BOND $H
CONF
LIST 4
TEMP -123.0
ACTA
SIZE 0.600 0.100 0.050
WGHT    0.035000    1.842000
FVAR       0.86753
O1    3    0.182177    0.632084   -0.033764    11.00000    0.03324    0.03157 =
         0.02750    0.00147    0.00800   -0.00135
O2    3    0.157285    0.281037   -0.067454    11.00000    0.04796    0.03812 =
         0.03145   -0.00565    0.01046   -0.00746
O3    3    0.359276    0.815917    0.003960    11.00000    0.04102    0.02820 =
         0.02549   -0.00321   -0.00072    0.00267
O4    3    0.391204    0.460063    0.031202    11.00000    0.04614    0.03540 =
         0.03512   -0.00044    0.00006    0.00743
C1    1    0.334915    0.451139   -0.251381    11.00000    0.04488    0.04155 =
         0.03194   -0.00843    0.00100    0.00329
AFIX  43
H1    2    0.311159    0.333634   -0.275936    11.00000   -1.20000
AFIX   0
C2    1    0.389419    0.618917   -0.274103    11.00000    0.04106    0.05390 =
         0.02796   -0.00307    0.00852    0.00853
AFIX  43
H2    2    0.402222    0.618464   -0.314491    11.00000   -1.20000
AFIX   0
C3    1    0.315544    0.456945   -0.192491    11.00000    0.03487    0.03343 =
         0.03106   -0.00221    0.00127   -0.00126
AFIX  43
H3    2    0.277928    0.342852   -0.177077    11.00000   -1.20000
AFIX   0
C4    1    0.424666    0.785596   -0.237647    11.00000    0.03533    0.04203 =
         0.03860    0.00547    0.01320    0.00313
AFIX  43
H4    2    0.462616    0.898435   -0.253337    11.00000   -1.20000
AFIX   0
C5    1    0.350277    0.627334   -0.155395    11.00000    0.02451    0.02872 =
         0.02680   -0.00028    0.00122    0.00246
C6    1    0.406201    0.793657   -0.178087    11.00000    0.02554    0.03076 =
         0.03335    0.00121    0.00412    0.00386
C7    1    0.323289    0.626154   -0.091628    11.00000    0.02835    0.02356 =
         0.02524    0.00092    0.00138    0.00027
AFIX  13
H7    2    0.330193    0.470062   -0.076491    11.00000   -1.20000
AFIX   0
C8    1    0.449701    0.975534   -0.139628    11.00000    0.03285    0.03272 =
         0.04289    0.00062    0.00684   -0.00680
AFIX  23
H8A   2    0.445600    1.118713   -0.161272    11.00000   -1.20000
H8B   2    0.516908    0.941301   -0.131126    11.00000   -1.20000
AFIX   0
C9    1    0.391217    0.775100   -0.054655    11.00000    0.02863    0.03273 =
         0.02585   -0.00311    0.00115    0.00098
AFIX  13
H9    2    0.453858    0.700426   -0.050820    11.00000   -1.20000
AFIX   0
C10   1    0.402588    1.001831   -0.081915    11.00000    0.03622    0.02631 =
         0.03639   -0.00341   -0.00011   -0.00372
AFIX  23
H10A  2    0.441296    1.098338   -0.054898    11.00000   -1.20000
H10B  2    0.340465    1.073081   -0.089098    11.00000   -1.20000
AFIX   0
C11   1    0.220074    0.693229   -0.089154    11.00000    0.02959    0.03377 =
         0.02648    0.00650    0.00527   -0.00031
AFIX  23
H11A  2    0.214201    0.856553   -0.094753    11.00000   -1.20000
H11B  2    0.182989    0.619443   -0.121665    11.00000   -1.20000
AFIX   0
C12   1    0.153485    0.419429   -0.029053    11.00000    0.02515    0.03174 =
         0.02993    0.00056    0.00231    0.00002
C13   1    0.114832    0.376596    0.029530    11.00000    0.02242    0.03412 =
         0.02711    0.00144    0.00181   -0.00103
C14   1    0.079908    0.165558    0.040425    11.00000    0.03718    0.03392 =
         0.03186   -0.00142    0.00532   -0.00208
AFIX  43
H14   2    0.084120    0.050702    0.012003    11.00000   -1.20000
AFIX   0
C15   1    0.038723    0.122211    0.092984    11.00000    0.04187    0.03478 =
         0.04017    0.00611    0.00947   -0.00469
AFIX  43
H15   2    0.012730   -0.020649    0.099867    11.00000   -1.20000
AFIX   0
C16   1    0.035631    0.287545    0.135299    11.00000    0.03655    0.04671 =
         0.02933    0.00650    0.00859   -0.00038
AFIX  43
H16   2    0.007885    0.257480    0.171292    11.00000   -1.20000
AFIX   0
C17   1    0.072793    0.495986    0.125276    11.00000    0.04206    0.04188 =
         0.02991   -0.00303    0.00664    0.00036
AFIX  43
H17   2    0.071535    0.608268    0.154613    11.00000   -1.20000
AFIX   0
C18   1    0.112063    0.541347    0.072189    11.00000    0.03389    0.03307 =
         0.03337   -0.00055    0.00587   -0.00396
AFIX  43
H18   2    0.137001    0.685154    0.065123    11.00000   -1.20000
AFIX   0
C19   1    0.367337    0.648020    0.042987    11.00000    0.02628    0.03162 =
         0.03229   -0.00212   -0.00428    0.00063
C20   1    0.345444    0.724101    0.102895    11.00000    0.02522    0.03695 =
         0.02947   -0.00276   -0.00186   -0.00484
C21   1    0.373554    0.589481    0.150336    11.00000    0.03365    0.04184 =
         0.03456    0.00279    0.00093   -0.00167
AFIX  43
H21   2    0.402156    0.449217    0.143873    11.00000   -1.20000
AFIX   0
C22   1    0.359887    0.659719    0.206971    11.00000    0.04707    0.04898 =
         0.03186    0.00673    0.00424   -0.00414
AFIX  43
H22   2    0.380102    0.569028    0.239447    11.00000   -1.20000
AFIX   0
C23   1    0.316735    0.862234    0.216199    11.00000    0.04555    0.05307 =
         0.03121   -0.00561    0.00971   -0.00766
AFIX  43
H23   2    0.307226    0.910212    0.255085    11.00000   -1.20000
AFIX   0
C24   1    0.287269    0.995646    0.168969    11.00000    0.03812    0.04325 =
         0.03931   -0.00703    0.00911    0.00056
AFIX  43
H24   2    0.256527    1.133189    0.175516    11.00000   -1.20000
AFIX   0
C25   1    0.302676    0.928297    0.112214    11.00000    0.03117    0.03924 =
         0.03314   -0.00136   -0.00058    0.00033
AFIX  43
H25   2    0.284097    1.021239    0.079858    11.00000   -1.20000
AFIX   0
HKLF 4

REM  M170417A
REM R1 =  0.0572 for    3111 Fo > 4sig(Fo)  and  0.0874 for all    4448 data
REM    262 parameters refined using      0 restraints

END

WGHT      0.0348      1.8474

REM Instructions for potential hydrogen bonds
HTAB C7 O4
EQIV $1 -x+1, -y+1, -z
HTAB C9 O4_$1

REM Highest difference peak  0.251,  deepest hole -0.219,  1-sigma level  0.049
Q1    1   0.3398  0.6273 -0.1231  11.00000  0.05    0.25
Q2    1   0.1331  0.4000  0.0043  11.00000  0.05    0.24
Q3    1   0.1608  0.4439 -0.1016  11.00000  0.05    0.22
Q4    1   0.2017  0.8550 -0.0757  11.00000  0.05    0.22
Q5    1   0.4016  0.8617 -0.0721  11.00000  0.05    0.21
Q6    1   0.4044  0.6743  0.1850  11.00000  0.05    0.21
Q7    1   0.2738  0.6579 -0.0951  11.00000  0.05    0.20
Q8    1   0.4154  0.4621  0.0753  11.00000  0.05    0.19
Q9    1   0.3821  0.7007  0.1238  11.00000  0.05    0.19
Q10   1   0.3760  1.0070 -0.0071  11.00000  0.05    0.19
Q11   1   0.3456  0.6677  0.0764  11.00000  0.05    0.19
Q12   1   0.3597  0.5023 -0.1683  11.00000  0.05    0.18
Q13   1   0.1553  0.3808  0.0388  11.00000  0.05    0.18
Q14   1   0.4447  0.8279 -0.1476  11.00000  0.05    0.18
Q15   1   0.4100  0.7709 -0.2061  11.00000  0.05    0.18
Q16   1   0.3432  0.6406  0.1253  11.00000  0.05    0.18
Q17   1   0.3519  0.8533  0.1102  11.00000  0.05    0.17
Q18   1   0.3696  0.7419 -0.1663  11.00000  0.05    0.17
Q19   1   0.4733  0.9794 -0.2485  11.00000  0.05    0.17
Q20   1   0.3590  1.0289  0.0533  11.00000  0.05    0.17
Q21   1   0.0143  0.1155  0.1664  11.00000  0.05    0.16
Q22   1   0.4411  0.6233 -0.3233  11.00000  0.05    0.16
Q23   1   0.0444 -0.1550  0.1047  11.00000  0.05    0.16
Q24   1   0.3374  0.4399 -0.2193  11.00000  0.05    0.16
Q25   1   0.3035  0.4762 -0.0745  11.00000  0.05    0.16
Q26   1   0.1562  0.2479 -0.1078  11.00000  0.05    0.16
Q27   1   0.3473  0.7186 -0.0720  11.00000  0.05    0.16
Q28   1   0.1782  0.4378 -0.0777  11.00000  0.05    0.16
Q29   1   0.0214  0.6030  0.0750  11.00000  0.05    0.16
Q30   1   0.3062  0.7799  0.1079  11.00000  0.05    0.15
Q31   1   0.0510  0.0439 -0.0032  11.00000  0.05    0.15
Q32   1   0.1166  0.2631  0.0355  11.00000  0.05    0.15
Q33   1   0.2769  0.9408  0.1371  11.00000  0.05    0.15
Q34   1   0.4048  0.8036 -0.1294  11.00000  0.05    0.15
Q35   1   0.3284  0.2047 -0.1878  11.00000  0.05    0.15
Q36   1   0.1575  0.2492 -0.0348  11.00000  0.05    0.15
;

_shelx_res_checksum   53645

_shelx_hkl_file
;
   0   0   4   11.97    2.34
   0   0  -4    9.46    1.54
   0   0   5   -3.92    3.09
   0   0  -5    0.54    1.95
   0   0   6 1326.08   27.54
   0   0  -6 1270.55   29.11
   0   0   7   52.97    3.30
   0   0  -7   57.53    5.05
   0   0   8   91.55    3.86
   0   0  -8   89.57    3.88
   0   0   9    1.60    0.67
   0   0  -9    1.64    2.57
   0   0  10  790.63   11.18
   0   0 -10  782.44   17.37
   0   0  11    1.81    0.89
   0   0 -11    5.66    3.16
   0   0  12   11.10    0.71
   0   0 -12    8.13    5.13
   0   0  13    0.55    0.50
   0   0 -13   -2.52    3.63
   0   0 -14  286.56    9.19
   0   0 -15   -0.44    4.01
   0   0 -16  691.87   19.65
   0   0 -17    1.78    7.53
   0   0 -18  453.38   21.23
   0   0 -19   -2.32    6.25
   0   0 -20    9.07    6.52
   0   0 -21   -0.12    6.61
   0   0 -22   46.97   12.62
   0   0 -23    3.99   13.14
   0   0 -24   91.19   12.33
   0   0 -25   -1.20    9.32
   0   0 -26   22.15   10.76
   0   0 -27   -2.65   16.16
   0   0 -28  158.13   26.82
   0   0 -29  -22.28   14.01
   0   1   0    0.97    3.41
   0  -1   0    4.16    3.28
   0   1  -1 3660.33  116.33
   0   1   1 3627.76  114.13
   0  -1   1 3539.62  111.78
   0  -1  -1 3716.84  116.26
   0   1  -2  975.07   23.56
   0   1   2 1040.53   28.61
   0  -1   2 1017.26   23.68
   0  -1  -2 1005.90   23.42
   0   1  -3 1571.04   40.82
   0   1   3 1631.12   41.42
   0  -1   3 1729.75   47.30
   0  -1  -3 1663.74   42.60
   0   1  -4  708.27   18.05
   0   1   4  753.98   24.24
   0  -1   4  728.75   17.22
   0  -1  -4  755.36   25.74
   0   1  -5  367.76   10.93
   0   1   5  368.19   10.67
   0  -1   5  362.96   12.12
   0  -1  -5  380.85   16.15
   0   1  -6  115.33    6.25
   0  -1  -6  112.95    5.08
   0  -1   6  121.45    7.23
   0  -1  -6  117.18   11.17
   0   1  -7  121.68    9.20
   0  -1  -7  138.55    3.47
   0  -1   7  121.79    7.01
   0  -1  -7  150.99    7.39
   0   1  -8 2179.11   64.69
   0  -1  -8 2207.79   52.78
   0  -1   8 2246.60   60.10
   0  -1  -8 2227.48   71.25
   0   1  -9 1233.17   39.11
   0  -1  -9 1175.12   22.42
   0  -1   9 1241.57   29.05
   0  -1  -9 1264.42   33.66
   0   1 -10   11.64    6.85
   0  -1 -10   11.49    1.43
   0  -1  10    8.25    4.93
   0  -1 -10   10.43    4.93
   0   1 -11  752.28   21.48
   0  -1 -11  763.96   11.70
   0  -1  11  789.16   18.36
   0  -1 -11  773.50   22.46
   0   1 -12  128.60    7.40
   0  -1 -12  131.12    5.51
   0  -1  12  123.11    7.67
   0   1 -13 1220.66   36.75
   0  -1 -13 1249.24   35.19
   0  -1  13 1235.85   31.17
   0   1 -14  206.32   10.36
   0  -1 -14  211.00    7.53
   0  -1  14  217.04   10.30
   0   1 -15   28.26    6.47
   0  -1 -15   17.57    4.52
   0  -1  15   26.76    4.37
   0   1 -16  147.38    9.96
   0  -1 -16  140.13   10.59
   0  -1  16  158.06    7.18
   0   1 -17 1046.00   36.79
   0  -1 -17 1048.57   30.56
   0  -1  17 1114.75   36.02
   0   1 -18   51.67    9.04
   0  -1 -18   49.00    6.40
   0  -1  18   67.39    6.36
   0   1 -19  230.12   14.96
   0  -1 -19  264.94   16.46
   0  -1  19  268.74   11.42
   0   1 -20 1092.48   42.02
   0  -1  20 1044.33   25.30
   0  -1 -20 1105.13   35.59
   0  -1  20 1137.28   34.52
   0   1 -21   39.61   10.04
   0  -1 -21   48.06    7.11
   0  -1 -21   50.20   10.88
   0   1 -22   23.96   15.51
   0  -1 -22   26.99   10.50
   0  -1 -22   36.45   10.64
   0   1 -23  190.21   25.29
   0  -1 -23  206.20   12.59
   0  -1 -23  186.39   17.25
   0   1 -24   53.19   17.34
   0  -1 -24   11.70    8.35
   0  -1 -24   27.33   11.47
   0   1 -25   29.79   13.70
   0  -1 -25   42.42    9.35
   0  -1 -25   58.89   12.65
   0   1 -26   88.64   15.34
   0  -1 -26   77.84   18.03
   0  -1 -26   80.96   15.05
   0   1 -27   18.49   12.85
   0  -1 -27    9.81    9.79
   0  -1 -27   31.92   20.12
   0   1 -28   70.96   16.62
   0  -1 -28   60.76   12.95
   0  -1 -28  108.93   26.43
   0   1 -29   25.90   14.54
   0  -1 -29   18.37   16.93
   0  -1 -29  -11.63   15.50
   0   2   0  122.18   13.40
   0  -2   0  155.52   13.15
   0   2   1   84.29    7.74
   0   2  -1   86.28    7.57
   0  -2   1   74.76    7.34
   0  -2  -1   87.61    7.91
   0   2  -2  288.74   17.67
   0   2   2  289.19   17.30
   0  -2   2  303.65   16.62
   0  -2  -2  295.70   17.38
   0   2  -3   60.89    7.31
   0   2   3   71.00    7.02
   0  -2   3   63.70    6.59
   0  -2  -3   74.63    7.28
   0   2  -4  589.11   20.84
   0   2   4  615.25   20.10
   0  -2   4  629.26   19.07
   0  -2  -4  612.88   20.27
   0   2  -5   38.81    6.82
   0   2   5   34.38   10.29
   0  -2   5   38.30    6.14
   0  -2  -5   45.58    6.84
   0   2  -6  165.17    9.53
   0   2   6  153.23   12.35
   0  -2   6  173.28    8.52
   0  -2  -6  168.39    9.84
   0   2  -7   54.10   10.38
   0   2   7   48.95    8.93
   0  -2   7   53.39    6.15
   0  -2  -7   54.67    7.18
   0   2  -8  287.20   13.21
   0   2   8  282.28   15.25
   0  -2   8  322.29   11.35
   0  -2  -8  321.14   19.94
   0   2  -9  427.23   16.43
   0  -2  -9  459.37   15.10
   0  -2   9  450.31   13.95
   0  -2  -9  462.78   18.03
   0   2 -10   75.23    8.39
   0  -2 -10   78.60    6.29
   0  -2  10   73.81    8.66
   0  -2 -10   72.73   14.31
   0   2 -11  910.61   38.97
   0  -2 -11  901.05   24.36
   0  -2  11  945.87   26.60
   0  -2 -11  895.17   33.07
   0   2 -12    9.06    6.99
   0  -2 -12    6.78    4.02
   0  -2  12   13.50    4.44
   0  -2 -12    2.30    7.80
   0   2 -13  104.78   10.34
   0  -2 -13  107.17    4.97
   0  -2  13  105.83    9.31
   0  -2 -13  112.80   17.55
   0   2 -14   99.43   10.43
   0  -2 -14   98.10    3.39
   0  -2  14  108.24    6.95
   0  -2 -14  114.62   16.73
   0   2 -15  413.15   27.04
   0  -2 -15  404.72    8.61
   0  -2  15  445.86   19.00
   0  -2 -15  398.00   21.43
   0   2 -16   71.02   15.96
   0  -2  16   72.19    6.53
   0  -2 -16   47.95   11.60
   0   2 -17  144.36   19.58
   0  -2 -17  150.25    8.69
   0  -2  17  181.39   13.04
   0  -2 -17  134.69   15.30
   0   2 -18  574.55   37.05
   0  -2 -18  570.22   24.33
   0  -2  18  624.63   19.54
   0  -2 -18  594.28   30.79
   0   2 -19   60.79   17.83
   0  -2 -19   53.86    6.64
   0  -2  19   64.97    6.88
   0  -2 -19   67.75   12.07
   0   2 -20  171.95   23.53
   0  -2 -20  179.24    9.56
   0  -2  20  191.40   13.82
   0  -2 -20  188.43   17.06
   0   2 -21  102.97   22.35
   0  -2 -21  100.20   11.90
   0  -2  21  108.51    8.26
   0  -2 -21  112.76   15.17
   0   2 -22  191.86   26.59
   0  -2 -22  170.03   10.91
   0  -2  22  195.68   10.87
   0  -2 -22  189.71   18.52
   0   2 -23   18.39   17.90
   0  -2  23   -4.69    7.20
   0  -2 -23   -2.16    6.18
   0  -2  23   19.08   10.11
   0  -2 -23    4.94   11.86
   0   2 -24   18.60   19.67
   0  -2 -24   16.46   11.78
   0  -2  24    8.29    7.46
   0  -2 -24   17.07   13.31
   0   2 -25   54.85   22.36
   0  -2 -25    7.51    7.70
   0  -2  25    9.06    7.68
   0  -2 -25   21.82   13.32
   0   2 -26   67.74   26.66
   0  -2 -26   49.35    9.87
   0  -2 -26   56.19   16.74
   0   2 -27   13.55   23.63
   0  -2 -27   10.21   12.92
   0  -2 -27    0.35   14.84
   0   2 -28   17.55   16.58
   0  -2 -28    2.39    9.83
   0  -2 -28    8.25   15.64
   0   3   0    3.36    6.72
   0  -3   0    6.39    6.79
   0   3   1  323.07   15.35
   0   3  -1  326.81   16.31
   0  -3   1  327.94   14.94
   0  -3  -1  332.13   15.95
   0   3   2   96.91    9.56
   0   3  -2   85.10    9.75
   0  -3   2   98.81    9.31
   0  -3  -2   94.92    9.96
   0   3  -3  328.67   17.00
   0   3   3  333.30   16.23
   0  -3   3  339.03   15.89
   0  -3  -3  344.32   16.63
   0   3  -4 1301.76   48.03
   0   3   4 1347.46   48.59
   0  -3   4 1366.33   47.46
   0  -3  -4 1467.40   61.53
   0   3  -5 1359.51   59.91
   0   3   5 1353.74   48.70
   0  -3   5 1433.67   49.00
   0  -3  -5 1384.42   60.45
   0   3  -6   83.38   10.03
   0   3   6   93.06    9.22
   0  -3   6   90.26    8.78
   0  -3  -6   79.37    9.93
   0   3  -7    0.68    7.38
   0   3   7    7.77    6.69
   0  -3   7   -4.00    6.02
   0  -3  -7   13.66    7.17
   0   3  -8   78.96   15.57
   0   3   8   76.71    8.85
   0  -3   8   66.05   13.12
   0  -3  -8   84.12   15.34
   0   3  -9  478.98   21.99
   0   3   9  471.19   26.66
   0  -3   9  504.43   19.99
   0  -3  -9  458.53   22.65
   0   3  10   13.25    7.15
   0   3 -10   -0.29   13.24
   0  -3  10    9.45    6.22
   0  -3 -10    2.01    4.84
   0  -3 -10   -5.31   13.32
   0   3  11    2.73    6.66
   0   3 -11   -6.26    8.56
   0  -3  11   10.87    9.10
   0  -3 -11    4.90    7.09
   0  -3 -11    4.31    8.96
   0   3 -12  182.32   15.10
   0  -3 -12  201.89   12.67
   0  -3  12  218.53   11.59
   0  -3 -12  207.84   24.78
   0   3 -13   22.70   14.81
   0  -3 -13    6.85    4.42
   0  -3  13    8.46    6.11
   0  -3 -13   27.15   10.30
   0   3 -14  137.89   13.76
   0  -3 -14  113.11    6.44
   0  -3  14  121.70    9.82
   0  -3 -14  121.01   15.06
   0   3 -15   68.50   13.98
   0  -3 -15   82.38    7.66
   0  -3  15   84.05    8.55
   0  -3 -15   81.89   14.86
   0   3 -16   59.72   13.06
   0  -3 -16   52.62    6.35
   0  -3  16   56.63    8.47
   0  -3 -16   47.08   21.92
   0   3 -17  681.95   36.24
   0  -3 -17  662.81   19.71
   0  -3  17  699.99   24.68
   0  -3 -17  674.94   48.76
   0   3 -18   90.03   24.18
   0  -3  18  112.23    9.57
   0  -3 -18  111.98   16.51
   0   3 -19   16.87   16.89
   0  -3 -19   -0.11    3.11
   0  -3  19    2.64    6.42
   0  -3 -19    0.63   11.80
   0   3 -20    9.67   18.02
   0  -3 -20    0.33    1.45
   0  -3  20   -6.34    6.48
   0  -3 -20    4.22   12.79
   0   3 -21   -7.14   13.07
   0  -3 -21    8.01    6.06
   0  -3  21   -2.31    9.89
   0  -3 -21   -1.24   13.67
   0   3 -22   21.06   14.02
   0  -3 -22    9.72   10.50
   0  -3  22    3.26    6.82
   0  -3 -22   26.03   14.24
   0   3 -23   32.45   15.04
   0  -3 -23   -4.58    6.67
   0  -3  23   -0.57    6.85
   0  -3 -23   13.79   14.18
   0   3 -24    6.11   15.85
   0  -3  24    7.33    9.63
   0  -3 -24    4.33    7.31
   0  -3  24   11.94   11.35
   0  -3 -24   11.57   15.03
   0   3 -25    1.95   16.41
   0  -3 -25    4.42   12.03
   0  -3  25    9.95    7.98
   0  -3 -25   16.70   16.08
   0   3 -26   12.22   17.06
   0  -3 -26    2.25    7.94
   0  -3  26   15.82   13.11
   0  -3 -26    8.26   16.36
   0   3 -27   38.14   19.19
   0  -3 -27   19.58    9.97
   0  -3  27   38.96    9.95
   0  -3 -27   21.72   19.23
   0   4   0   20.06    9.69
   0  -4   0   23.70    9.30
   0   4   1   52.72   14.19
   0   4  -1    2.54    9.10
   0  -4   1   39.04   14.15
   0  -4  -1   -1.27    9.29
   0   4   2   19.74    9.39
   0   4  -2    9.50   10.52
   0  -4   2    2.92   14.91
   0  -4  -2   40.37   14.97
   0   4   3   54.15   11.18
   0  -4   3   68.11   10.59
   0  -4  -3   60.91   11.68
   0   4   4  454.80   23.57
   0   4  -4  456.66   24.50
   0  -4   4  484.50   22.83
   0  -4  -4  462.46   24.16
   0   4  -5  162.49   17.06
   0   4   5  288.86   24.11
   0  -4   5  192.58   22.08
   0  -4  -5  204.01   16.79
   0   4  -6   92.06   21.27
   0   4   6  104.73   20.42
   0  -4   6   98.35   12.59
   0  -4  -6  132.31   13.92
   0   4  -7   58.83   12.68
   0   4   7   68.21   11.48
   0  -4   7   65.70   10.81
   0  -4  -7   74.52   12.23
   0   4  -8   18.54   16.59
   0   4   8   24.69   10.09
   0  -4   8   20.11    8.91
   0  -4  -8    9.92   16.22
   0   4  -9   19.61   11.06
   0   4   9   13.47   14.74
   0  -4   9   20.13    9.24
   0  -4  -9   30.64   10.73
   0   4 -10   12.38   11.07
   0   4  10    6.35    9.45
   0  -4  10   10.37    8.53
   0  -4 -10    0.46   16.88
   0   4  11   43.87   11.41
   0   4 -11   53.08   13.97
   0  -4  11   68.87   14.62
   0  -4 -11   56.58    8.60
   0  -4 -11   64.89   13.40
   0   4  12  163.41   22.19
   0   4 -12  149.44   18.09
   0  -4  12  163.23   14.04
   0  -4 -12  169.38   15.74
   0  -4 -12  154.89   17.68
   0   4  13   14.35    9.07
   0   4 -13  -15.66   19.21
   0  -4  13   23.30   13.02
   0  -4 -13   10.96    7.00
   0  -4 -13    8.09   19.55
   0   4 -14   32.92   23.05
   0  -4 -14   62.58    8.10
   0  -4  14   60.53   10.68
   0  -4 -14   58.48   15.24
   0   4 -15  258.52   25.38
   0  -4 -15  350.05   20.42
   0  -4  15  327.73   19.14
   0  -4 -15  325.13   26.34
   0   4 -16 1106.46   62.98
   0  -4 -16 1221.01   42.19
   0  -4  16 1327.26   52.07
   0  -4 -16 1169.21   65.00
   0   4 -17  284.48   27.76
   0  -4 -17  329.35   13.81
   0  -4  17  302.85   17.28
   0  -4 -17  316.36   39.07
   0   4 -18  -36.72   23.78
   0  -4  18  -10.05    8.76
   0  -4 -18   -9.60   14.54
   0   4 -19   66.96   28.42
   0  -4 -19   67.60    8.90
   0  -4  19   65.61   15.07
   0  -4 -19   92.56   18.87
   0   4 -20   47.82   17.90
   0  -4 -20   27.77    6.57
   0  -4  20   48.37    9.74
   0  -4 -20   41.73   17.40
   0   4 -21    0.63   16.52
   0  -4 -21    4.24    4.58
   0  -4  21   -6.95   13.27
   0  -4 -21   19.75   15.84
   0   4 -22   20.71   17.81
   0  -4  22   22.47    8.69
   0  -4 -22   -8.75   17.06
   0   4 -23   10.49   17.73
   0  -4 -23   21.04    7.91
   0  -4  23   15.76    8.70
   0  -4 -23   26.03   18.00
   0   4 -24   28.06   18.47
   0  -4 -24   12.94    8.07
   0  -4  24   -7.40   12.95
   0  -4 -24  -11.54   18.01
   0   4 -25  -17.38   20.19
   0  -4 -25   12.44   13.07
   0  -4  25    9.85    9.06
   0  -4 -25   16.68   29.28
   0   5   0  199.88   28.43
   0  -5   0  128.07   27.17
   0   5   1  155.46   17.01
   0   5  -1  135.73   16.86
   0  -5   1  132.97   16.97
   0  -5  -1  121.28   16.70
   0   5   2  225.19   20.62
   0   5  -2  207.51   21.20
   0  -5   2  225.71   20.29
   0  -5  -2  370.79   32.91
   0   5   3  312.28   33.45
   0  -5   3  200.63   31.44
   0  -5  -3  210.13   20.99
   0   5  -4  344.11   27.28
   0  -5  -4  361.68   30.26
   0   5   5  551.14   41.49
   0   5  -5  488.73   45.02
   0  -5   5  558.33   40.47
   0  -5  -5  385.07   35.72
   0   5  -6   24.94   16.71
   0  -5   6   75.03   14.81
   0  -5  -6   86.56   16.25
   0   5   7  229.53   20.47
   0   5  -7  234.34   33.23
   0  -5   7  262.34   20.19
   0  -5  -7  235.75   23.05
   0   5  -8    5.60   13.53
   0   5   8   11.55   19.74
   0  -5   8   -0.43   17.25
   0  -5  -8   18.33   13.57
   0   5  -9  207.45   22.01
   0   5   9  187.02   19.07
   0  -5   9  224.25   18.67
   0  -5  -9  219.47   22.01
   0   5  10  123.72   15.71
   0   5 -10  147.60   28.63
   0  -5  10  131.12   23.45
   0  -5 -10  139.66   13.18
   0  -5 -10  139.90   27.30
   0   5  11    6.39   10.89
   0   5 -11   -7.89   14.06
   0  -5  11  -12.31   10.44
   0  -5 -11   19.28    8.99
   0  -5 -11    0.24   13.28
   0   5  12  175.54   16.86
   0   5 -12  169.93   23.03
   0  -5  12  144.87   23.47
   0  -5 -12  228.99   22.54
   0  -5 -12  189.22   21.26
   0   5  13   38.22   18.79
   0   5 -13    2.74   25.41
   0  -5  13   40.20   11.57
   0  -5 -13   35.16    9.95
   0  -5 -13   17.78   23.99
   0   5  14   65.86   13.38
   0   5 -14   68.71   18.82
   0  -5  14   76.77   18.52
   0  -5 -14   77.18   18.08
   0  -5 -14   57.51   18.31
   0   5 -15   84.46   21.85
   0  -5 -15  131.08   12.13
   0  -5  15   98.02   14.75
   0  -5 -15  108.84   20.85
   0   5 -16    3.34   25.30
   0  -5 -16   -0.15   12.15
   0  -5  16    7.33   16.53
   0  -5 -16   32.36   23.30
   0   5 -17   -1.72   25.29
   0  -5 -17    2.02    8.01
   0  -5  17    5.63   10.12
   0  -5 -17    4.95   23.63
   0   5 -18   17.98   18.62
   0  -5 -18   17.04    8.13
   0  -5  18   34.67   17.91
   0  -5 -18   20.66   17.64
   0   5 -19  -15.77   18.22
   0  -5 -19    4.48   12.34
   0  -5  19    9.92    9.74
   0  -5 -19   34.38   17.45
   0   5 -20   -6.12   18.71
   0  -5 -20    3.62    6.85
   0  -5  20   15.08    9.61
   0  -5 -20    4.88   17.86
   0   5 -21   37.47   20.84
   0  -5  21   23.26   10.93
   0  -5 -21   32.18   31.97
   0   5 -22    3.71   21.23
   0  -5  22   18.69   10.73
   0  -5 -22   25.47   31.46
   0   6   0  325.46   30.13
   0  -6   0  337.56   30.83
   0   6   1  335.89   29.18
   0   6  -1  331.26   30.36
   0  -6   1  355.10   30.27
   0  -6  -1  349.89   31.69
   0   6  -2   21.29   15.56
   0  -6  -2   21.46   15.24
   0   6   3    3.47   14.25
   0   6  -3    7.42   14.90
   0  -6   3   27.14   13.99
   0  -6  -3   11.64   14.78
   0   6   4  -25.79   13.74
   0   6  -4   -3.27   15.13
   0  -6   4    5.10   13.78
   0  -6  -4   33.73   22.28
   0   6   5   85.83   17.76
   0   6  -5   87.98   19.59
   0  -6   5   81.17   17.93
   0  -6  -5  105.79   19.63
   0   6   6   21.94   23.48
   0   6  -6   14.88   25.61
   0  -6   6   15.38   22.52
   0  -6  -6   22.33   24.11
   0   6   7   26.41   14.48
   0   6  -7   18.50   16.39
   0  -6   7   16.45   14.09
   0  -6  -7    5.22   16.60
   0   6   8   -2.89   21.61
   0   6  -8  -39.56   25.17
   0  -6   8    2.67   20.22
   0  -6  -8    0.31   15.71
   0   6   9   19.12   13.23
   0   6  -9  -25.91   16.59
   0  -6   9   27.20   12.83
   0  -6  -9   10.01   11.09
   0  -6  -9   -8.22   15.82
   0   6 -10   22.31   17.77
   0   6  10    9.23   20.29
   0  -6 -10   20.11   11.94
   0  -6 -10    1.01   16.91
   0  -6  10    2.28   20.62
   0   6  11   68.18   15.90
   0   6 -11   62.34   32.41
   0  -6  11   66.36   16.10
   0  -6 -11   62.49   21.76
   0  -6 -11   93.80   29.39
   0   6  12   21.24   19.67
   0   6 -12   26.31   17.84
   0  -6  12   -4.69   13.70
   0  -6 -12   10.44   11.04
   0  -6 -12   21.88   17.47
   0   6  13    5.56   12.83
   0   6 -13  -20.95   17.95
   0  -6  13   15.79   12.24
   0  -6 -13    1.06   11.09
   0  -6 -13    9.21   17.32
   0   6  14   13.26   19.13
   0   6 -14   -5.83   19.36
   0  -6  14   26.31   13.74
   0  -6 -14   18.64   17.38
   0  -6 -14   33.70   18.63
   0   6  15   13.03   11.75
   0   6 -15   -2.82   28.53
   0  -6  15    0.51   11.78
   0  -6 -15   -3.49   10.70
   0  -6 -15   26.19   25.90
   0   6 -16  -14.19   19.86
   0  -6 -16   -1.39   16.93
   0  -6  16   18.09   12.20
   0  -6 -16    5.88   18.30
   0   6 -17    9.25   20.53
   0  -6 -17    4.75   10.50
   0  -6  17   20.04   17.74
   0  -6 -17    2.52   19.33
   0   6 -18  -11.05   21.72
   0  -6 -18   21.41   16.35
   0  -6  18   12.30   12.58
   0  -6 -18   19.32   20.40
   0   7   0   -1.32   17.34
   0  -7   0  -17.11   16.71
   0   7   1   18.86   25.84
   0   7  -1  -26.80   25.25
   0  -7   1  -17.46   25.41
   0  -7  -1   11.59   25.14
   0   7   2   19.86   17.28
   0   7  -2   25.76   18.74
   0  -7   2   27.67   16.89
   0  -7  -2    3.69   17.91
   0   7   3    3.21   27.15
   0   7  -3    9.99   18.17
   0  -7   3    3.86   25.25
   0  -7  -3   14.73   17.74
   0   7   4   20.19   16.55
   0   7  -4   -4.16   17.80
   0  -7   4   -9.01   16.55
   0  -7  -4   -1.67   25.43
   0   7   5   32.43   17.86
   0   7  -5   37.81   19.63
   0  -7   5   37.23   17.52
   0  -7  -5   24.90   19.07
   0   7   6   -6.01   16.68
   0   7  -6   -2.83   29.16
   0  -7   6  -17.61   16.44
   0  -7  -6  -11.18   27.20
   0   7  -7    6.43   19.03
   0   7   7   10.52   16.02
   0  -7  -7    8.62   13.94
   0  -7  -7   10.36   17.90
   0  -7   7   -4.54   16.02
   0   7  -8   26.84   19.78
   0   7   8    9.89   24.85
   0  -7  -8  -12.33   14.08
   0  -7  -8   30.81   19.00
   0  -7   8   42.30   24.29
   0   7  -9    1.80   29.87
   0   7   9   -5.61   16.77
   0  -7  -9   10.29   22.24
   0  -7  -9  -17.17   29.31
   0  -7   9  -32.03   16.20
   0   7 -10   17.45   22.88
   0   7  10   52.32   26.77
   0  -7 -10   28.24   22.98
   0  -7 -10   47.59   22.43
   0  -7  10   50.33   27.00
   0   7 -11    3.96   20.93
   0   7  11   -8.22   16.15
   0  -7 -11   17.42   13.87
   0  -7 -11   18.64   20.99
   0  -7  11   11.03   15.79
   0   7 -12    5.89   31.81
   0   7  12    7.73   22.84
   0  -7 -12  -11.28   13.32
   0  -7 -12   -3.76   20.00
   0  -7  12   19.49   15.41
   1   0 -29  125.51   28.53
   1   0 -28  -15.57   18.58
   1   0 -27    5.69   11.15
   1   0 -26    3.70   10.13
   1   0 -25    7.82    9.83
   1   0 -24    8.88   14.60
   1   0 -23   35.46   13.50
   1   0 -22  -11.79    7.59
   1   0 -21   39.37    8.27
   1   0 -20   -4.97    6.42
   1   0 -19   49.96   11.36
   1   0 -18    2.68    8.36
   1   0 -17  453.47   15.03
   1   0 -16    3.24    4.57
   1   0 -15    5.80    4.41
   1   0 -14    4.41    6.30
   1   0 -13  843.59   23.63
   1   0 -12   -0.63    3.23
   1   0 -11  834.36   19.20
   1   0 -10   -0.75    2.85
   1   0  -9 1120.49   27.57
   1   0  -8   -1.73    2.41
   1   0  -7   16.74    2.49
   1   0  -6   -4.29    2.33
   1   0  -5 9040.84  399.57
  -1   0   5 8735.03  343.29
   1   0  -4    0.25    0.96
   1   0  -4   -0.69    1.41
  -1   0   4    1.59    0.78
   1   0   3 2240.38   46.51
  -1   0  -3 2155.85   46.83
   1   0   4   -3.92    1.39
  -1   0  -4   -3.35    1.48
   1   0   5   26.71    2.16
  -1   0  -5   26.06    2.29
   1   0   6    1.22    2.25
  -1   0  -6    2.52    2.40
   1   0   7  481.48   11.25
  -1   0  -7  452.41    9.28
   1   0   8    2.37    2.30
  -1   0  -8    2.86    2.32
   1   0   9  389.55    6.11
   1   0   9  399.81    8.56
  -1   0  -9  382.60   10.62
   1   0  10   -1.25    1.41
   1   0  10   -1.23    2.62
  -1   0 -10   -0.90    4.59
   1   0  11 3825.02  105.97
  -1   0 -11 3758.12  125.21
   1   0  12    1.17    1.29
  -1   0 -12    2.03    3.30
   1   0  13    8.77    1.47
  -1   0 -13    7.31    3.80
   1   0  14    0.82    1.47
  -1   0 -14   -5.61    3.77
   1   0  15   -0.53    1.94
  -1   0 -15    9.20    6.20
   1   0  16    2.49    1.41
  -1   0 -16    0.58    7.72
   1   0  17  209.57    4.16
  -1   0 -17  214.73    9.79
  -1   0 -18   -0.97    5.40
  -1   0 -19 1169.45   38.49
  -1   0 -20    4.08    6.40
  -1   0 -21  494.38   25.32
  -1   0 -22   17.88    8.31
  -1   0 -23   63.47   10.47
  -1   0 -24    9.04    8.64
  -1   0 -25   30.83   10.57
  -1   0 -26   14.45   15.99
  -1   0 -27   22.73   18.87
  -1   0 -28  -11.55   12.36
  -1   0 -29   60.75   15.28
   1   1 -29   24.91   14.51
   1  -1 -29    6.12   11.29
   1  -1 -29    4.84   15.80
   1   1 -28   14.77   14.18
   1  -1 -28   13.82   10.92
   1  -1 -28   32.92   23.94
   1   1 -27   17.10   13.17
   1  -1 -27   16.20   10.36
   1  -1 -27   15.25   23.03
   1   1 -26   16.02   13.00
   1  -1 -26    6.57   13.35
   1  -1 -26   23.42   18.96
   1   1 -25  127.76   24.02
   1  -1 -25  100.28   11.12
   1  -1 -25  104.33   15.48
   1   1 -24    1.34   15.69
   1  -1 -24   13.71    7.71
   1  -1 -24   14.24   11.59
   1   1 -23   28.36   10.32
   1  -1 -23   31.83   12.34
   1  -1 -23   35.38   11.76
   1   1 -22    9.04    8.46
   1  -1 -22   -5.73    6.13
   1  -1 -22  -13.30   10.26
   1   1 -21   87.13   10.82
   1  -1 -21   93.75    8.26
   1  -1 -21   80.13   12.70
   1   1 -20  503.87   23.35
   1  -1 -20  508.85   18.16
   1  -1 -20  554.74   25.97
   1   1 -19    4.99    7.89
   1  -1 -19    2.74    8.04
   1  -1 -19    4.74    8.78
  -1  -1  19    3.12    1.69
  -1  -1  19   -6.92    5.74
   1   1 -18   28.74    8.17
   1  -1 -18   25.84    5.77
  -1  -1  18   18.92    2.99
  -1  -1  18   26.32    5.94
   1   1 -17  143.10   10.83
   1  -1 -17  139.60    7.69
  -1  -1  17  133.91    5.67
  -1  -1  17  133.06   11.40
   1   1 -16  701.92   25.00
   1  -1 -16  671.70   23.73
  -1  -1  16  753.99   18.60
  -1  -1  16  708.25   19.36
   1   1 -15   23.41    6.38
   1  -1 -15   19.97    4.37
  -1  -1  15   16.40    4.36
   1   1 -14  147.67    9.08
   1  -1 -14  151.99    6.35
  -1  -1  14  149.54    8.82
   1   1 -13   64.54    6.73
   1  -1 -13   74.94    4.98
  -1  -1  13   79.10    4.78
   1   1 -12  940.62   26.65
   1  -1 -12  911.09   22.23
   1  -1 -12  952.21   28.27
  -1  -1  12  927.22   22.19
   1   1 -11 3233.39  110.77
   1  -1 -11 3139.46   74.33
   1  -1 -11 3253.79  112.65
  -1  -1  11 3304.63  106.56
   1   1 -10  130.79    6.70
   1  -1 -10  122.80    7.70
  -1  -1  10  125.01    5.09
   1   1  -9 2015.11   59.50
   1  -1  -9 2106.44   48.10
   1  -1  -9 2087.10   61.74
  -1  -1   9 2186.15   60.92
   1   1  -8  117.00    8.92
   1  -1  -8  137.87    7.71
  -1  -1   8  130.85    4.85
   1   1  -7    7.66    4.02
   1  -1  -7    2.41    4.79
  -1  -1   7   10.27    2.84
   1   1  -6    0.08    5.66
   1  -1  -6   -2.42    4.76
  -1  -1   6   -0.22    2.98
   1   1  -5  171.19    6.77
  -1   1   5  179.65   10.87
  -1  -1   5  172.60    5.91
   1  -1  -5  184.44    8.93
   1   1  -4  364.92    9.97
  -1   1   4  373.52   11.66
  -1  -1   4  370.45    9.26
   1  -1  -4  383.19   12.77
   1   1  -3   45.85    6.80
  -1   1   3   49.82    7.98
  -1  -1   3   52.97    3.91
   1  -1  -3   51.76    5.46
   1   1  -2   31.04    6.10
  -1   1   2   30.27    7.21
  -1  -1   2   29.57    3.53
   1  -1  -2   29.46    4.30
   1   1  -1 4209.63  141.53
  -1   1   1 4308.17  147.31
  -1  -1   1 4304.81  147.33
   1  -1  -1 4439.94  157.54
   1   1   0  408.03   10.29
  -1   1   0  444.63   11.51
  -1  -1   0  445.66   13.06
   1  -1   0  446.57   14.44
   1   1   1 3980.44  132.76
  -1   1  -1 3931.43  137.61
   1  -1   1 3992.73  130.91
  -1  -1  -1 3812.82  123.53
  -1  -1  -1 4035.12  128.46
   1   1   2 2177.74   62.02
  -1   1  -2 2263.33   63.02
   1  -1   2 2156.05   58.92
  -1  -1  -2 2251.54   63.57
  -1  -1  -2 2228.30   63.22
   1   1   3 2568.66   71.59
  -1   1  -3 2538.06   74.42
   1  -1   3 2560.04   72.85
  -1  -1  -3 2586.05   70.53
  -1  -1  -3 2552.78   72.24
   1   1   4 2419.12   66.32
  -1   1  -4 2448.17   76.85
   1  -1   4 2381.30   71.02
  -1  -1  -4 2415.50   63.75
  -1  -1  -4 2389.71   74.67
  -1   1  -5  174.00   10.29
  -1  -1  -5  179.28    4.87
   1  -1   5  172.44    6.37
  -1  -1  -5  179.97    7.49
  -1   1  -6   -0.70    6.82
  -1  -1  -6    9.53    3.31
   1  -1   6    3.94    3.31
  -1  -1  -6    8.45    6.61
  -1   1  -7    1.66    4.12
  -1  -1  -7   -1.55    2.75
   1  -1   7    1.27    3.16
  -1  -1  -7   -3.44    4.13
  -1   1  -8  113.61    8.74
  -1  -1  -8  110.86    3.69
   1  -1   8  114.41    4.82
  -1  -1  -8  118.39    6.25
  -1   1  -9  178.16    7.61
  -1  -1  -9  178.98    3.45
   1  -1   9  169.76    7.80
  -1  -1  -9  186.45    7.87
  -1   1 -10  182.69    8.36
  -1  -1 -10  188.26    4.14
   1  -1  10  187.98    6.29
  -1  -1 -10  190.17    8.50
  -1   1 -11  754.10   26.26
   1  -1  11  716.44   16.83
  -1  -1 -11  725.13   16.68
  -1  -1 -11  698.47   12.06
  -1   1 -12  737.40   26.21
  -1  -1 -12  788.45   21.65
   1  -1  12  797.60   19.16
  -1   1 -13    4.07    8.05
  -1  -1 -13    9.62    3.52
   1  -1  13    8.69    3.59
  -1   1 -14  427.28   15.66
  -1  -1 -14  444.94   12.03
   1  -1  14  470.88   12.57
  -1   1 -15  344.69   14.32
  -1  -1 -15  365.76   14.37
   1  -1  15  356.39   13.94
  -1   1 -16  109.08    9.01
  -1  -1 -16  104.13    6.29
   1  -1  16  118.58    6.56
  -1   1 -17    0.77    7.12
  -1  -1 -17   16.05    4.74
   1  -1  17   11.63    4.75
  -1   1 -18   65.60   13.61
  -1  -1 -18   49.59    9.50
   1  -1  18   64.24    9.85
  -1   1 -19 1255.09   56.68
  -1  -1 -19 1308.59   41.95
   1  -1  19 1371.42   41.47
  -1   1 -20  161.12   19.25
  -1  -1 -20  147.78    9.60
   1  -1  20  183.57    9.72
  -1   1 -21  199.31   24.05
  -1  -1 -21  198.22   14.87
  -1  -1 -21  210.48   15.53
  -1   1 -22    8.82   14.57
  -1  -1 -22    6.45    6.32
   1  -1  22    1.99    1.43
  -1  -1 -22   -8.68    9.49
  -1   1 -23  158.11   15.45
  -1  -1 -23  132.97   11.28
  -1  -1 -23  130.77   14.74
  -1   1 -24   21.41   11.39
  -1  -1 -24   12.56    7.64
  -1  -1 -24   14.81   10.77
  -1   1 -25   14.56   11.73
  -1  -1 -25   12.10   13.08
  -1  -1 -25   -1.41   11.00
  -1   1 -26   -2.86   11.29
  -1  -1 -26    4.70    9.16
  -1  -1 -26   11.88   11.37
  -1   1 -27    1.42   12.60
  -1  -1 -27   -1.14    9.39
  -1  -1 -27   -7.05   18.50
  -1   1 -28   20.51   20.62
  -1  -1 -28  -11.98   15.76
  -1  -1 -28   33.21   22.20
  -1   1 -29   40.47   25.59
  -1  -1 -29   43.42   20.71
  -1  -1 -29   16.88   15.78
   1   2 -28   69.35   31.99
   1  -2 -28   93.18   19.25
   1  -2 -28   87.26   20.82
   1   2 -27   33.85   23.97
   1  -2 -27   27.94    9.24
   1  -2 -27   39.64   17.07
   1   2 -26  -17.86   20.62
   1  -2 -26    8.05    7.84
   1  -2 -26   -3.57   14.78
   1   2 -25   11.25   19.66
   1  -2 -25   10.71   11.93
   1  -2 -25   -0.35   13.96
   1   2 -24   21.85   13.97
   1  -2 -24   19.21   11.68
   1  -2 -24   42.69   14.54
  -1  -2  24   37.83    7.96
   1   2 -23    3.17   12.36
   1  -2 -23   12.91    6.71
   1  -2 -23   19.28   12.72
  -1  -2  23    4.84    5.04
  -1  -2  23    5.09    6.82
   1   2 -22   73.09   14.51
   1  -2 -22   85.44   12.49
   1  -2 -22   78.89   15.64
  -1  -2  22   67.82    5.92
  -1  -2  22   92.95   12.51
   1   2 -21   25.60   11.54
   1  -2 -21   14.27    6.15
   1  -2 -21    3.27   12.19
  -1  -2  21   17.72    5.08
  -1  -2  21   20.86    6.41
   1   2 -20    4.84   10.43
   1  -2 -20   12.70    5.46
   1  -2 -20    3.10   11.05
  -1  -2  20    8.74    8.14
  -1  -2  20   -0.55    5.79
   1   2 -19  564.27   28.63
   1  -2 -19  564.49   24.40
   1  -2 -19  562.50   30.07
  -1  -2  19  586.59   24.24
   1   2 -18  -13.01    8.89
   1  -2 -18   -2.74    5.32
   1  -2 -18    8.62   10.35
  -1  -2  18    2.96    5.32
   1   2 -17  357.16   19.74
   1  -2 -17  342.78   13.74
   1  -2 -17  364.93   22.40
  -1  -2  17  393.75   17.88
   1   2 -16  942.94   37.66
   1  -2 -16  967.51   42.05
  -1  -2  16 1034.28   30.09
   1   2 -15   38.31   13.77
   1  -2 -15   45.32    2.93
   1  -2 -15   36.22   10.55
  -1  -2  15   46.39    5.62
   1   2 -14  129.04   16.33
   1  -2 -14  125.74    3.78
   1  -2 -14  140.22   19.74
  -1  -2  14  140.51    7.47
   1   2 -13   11.83    7.42
   1  -2 -13   10.59    3.73
   1  -2 -13   21.18    8.66
  -1  -2  13    7.65    4.43
   1   2 -12   59.69    8.23
   1  -2 -12   60.68    3.48
   1  -2 -12   64.84    9.89
  -1  -2  12   64.55    5.50
   1   2 -11  133.63    9.37
   1  -2 -11  139.47    5.16
   1  -2 -11  156.29   11.38
  -1  -2  11  129.69    9.23
   1   2 -10   24.94   10.90
   1  -2 -10   38.99    8.21
  -1  -2  10   38.15    4.96
   1   2  -9  260.49   12.10
  -1   2   9  253.39   10.81
  -1  -2   9  291.55    9.98
   1  -2  -9  271.92   14.32
   1   2  -8  131.16   12.53
  -1   2   8  124.95   11.99
  -1  -2   8  108.65    9.48
   1  -2  -8  120.31    9.94
   1   2  -7   -0.32    5.65
  -1   2   7    8.81    8.86
  -1  -2   7   13.22    4.49
   1  -2  -7    9.65    6.20
   1   2  -6   27.93    5.89
  -1   2   6   10.84    9.65
  -1  -2   6   11.20    5.00
   1  -2  -6   20.11    6.46
   1   2  -5  305.75   12.26
  -1   2   5  314.55   17.60
  -1  -2   5  292.39   10.71
   1  -2  -5  298.23   13.16
   1   2  -4 5392.30  232.11
  -1   2   4 5307.74  227.64
  -1  -2   4 5312.37  229.79
   1  -2  -4 5296.48  228.11
   1   2  -3 2135.24   70.79
  -1   2   3 2158.65   72.58
  -1  -2   3 2253.17   70.34
   1  -2  -3 2194.88   72.62
   1   2  -2   37.26    6.29
  -1   2   2   47.12   10.59
  -1  -2   2   37.72    5.93
   1  -2  -2   43.57   10.52
   1   2  -1   22.65    8.89
  -1   2   1   11.94    6.25
  -1  -2   1   18.40    8.17
   1  -2  -1   15.74    6.29
   1   2   0  232.26   10.58
  -1   2   0  243.33   15.92
   1  -2   0  248.97   11.59
  -1  -2   0  237.71   10.45
   1   2   1  632.99   20.09
  -1   2  -1  631.70   21.26
   1  -2   1  625.56   20.17
  -1  -2  -1  674.88   20.50
  -1   2  -2  145.51    9.37
   1   2   2  139.47   12.22
   1  -2   2  136.51    9.00
  -1  -2  -2  147.16    8.51
  -1   2  -3  602.99   26.13
   1   2   3  583.05   18.99
   1  -2   3  617.48   24.73
  -1  -2  -3  588.12   23.81
  -1   2  -4    3.69    9.32
   1   2   4   -4.26    8.33
   1  -2   4   11.15    5.14
  -1  -2  -4    1.25    5.32
   1   2   5  138.48   11.67
  -1   2  -5  138.42   13.41
   1  -2   5  146.11    8.26
  -1  -2  -5  135.53    7.02
  -1  -2  -5  156.49    8.82
   1   2   6  440.38   14.52
  -1   2  -6  450.20   21.91
   1  -2   6  463.49   15.00
  -1  -2  -6  454.12   17.18
  -1  -2  -6  456.14   16.32
   1   2   7  608.50   18.62
  -1   2  -7  606.89   21.17
   1  -2   7  634.17   19.04
  -1  -2  -7  613.31   16.97
  -1  -2  -7  611.58   20.61
   1   2   8  810.59   23.63
  -1   2  -8  808.96   26.58
   1  -2   8  816.30   23.70
  -1  -2  -8  785.03   21.23
  -1  -2  -8  881.61   34.69
  -1   2  -9  417.81   16.71
  -1  -2  -9  405.35   13.53
   1  -2   9  436.07   17.31
  -1  -2  -9  440.67   17.67
  -1   2 -10  918.17   31.64
  -1  -2 -10  948.60   27.00
   1  -2  10 1028.83   34.13
  -1  -2 -10 1027.44   43.16
  -1   2 -11 1063.27   37.71
  -1  -2 -11 1131.85   30.62
   1  -2  11 1157.55   32.79
  -1  -2 -11 1112.47   39.37
  -1   2 -12   56.32   13.21
  -1  -2 -12   61.01    4.91
   1  -2  12   55.31    5.69
  -1  -2 -12   53.95    8.99
  -1   2 -13    7.83    6.92
  -1  -2 -13    4.55    3.45
   1  -2  13    3.26    4.77
  -1  -2 -13   -0.71   12.72
  -1   2 -14  107.62   10.24
  -1  -2 -14   94.76    4.47
   1  -2  14   99.11    6.61
  -1  -2 -14  112.17   16.48
  -1   2 -15   -1.92    7.60
  -1  -2 -15    0.16    2.49
   1  -2  15    1.16    4.73
  -1  -2 -15   -1.64    8.04
  -1   2 -16  532.64   24.18
  -1  -2 -16  499.94   16.37
   1  -2  16  534.62   16.73
  -1  -2 -16  525.28   26.11
  -1   2 -17  647.91   29.57
  -1  -2 -17  632.14   20.62
   1  -2  17  680.90   20.86
  -1  -2 -17  624.82   30.63
  -1   2 -18   72.34   18.15
  -1  -2 -18   60.17   10.13
   1  -2  18   83.87   10.09
  -1  -2 -18   78.94   12.46
  -1   2 -19   37.37   17.28
  -1  -2 -19   33.15    5.82
   1  -2  19   34.74    6.24
  -1  -2 -19   22.94   11.36
  -1   2 -20  242.01   26.91
  -1  -2 -20  213.88   14.59
   1  -2  20  243.16   15.83
  -1  -2 -20  228.08   17.85
  -1   2 -21   12.45   18.64
  -1  -2 -21   17.22    6.33
   1  -2  21   27.30    6.56
  -1  -2 -21   30.04   11.82
  -1   2 -22   52.17   21.32
  -1  -2 -22   41.72    7.28
   1  -2  22   59.14    7.59
  -1  -2 -22   45.76   13.35
  -1   2 -23    6.08   19.22
  -1  -2 -23   14.80   10.22
   1  -2  23    1.75   10.43
  -1  -2 -23   12.49   12.57
  -1   2 -24   21.40   13.98
  -1  -2 -24   26.34    7.71
   1  -2  24   19.71    7.65
  -1  -2 -24   32.72   13.10
  -1   2 -25   17.77   14.58
  -1  -2 -25    3.80    7.77
   1  -2  25   23.18    7.80
  -1  -2 -25   15.60   13.58
  -1   2 -26   38.25   16.03
  -1  -2 -26   28.39   13.25
  -1  -2 -26   25.50   15.16
  -1   2 -27   32.66   16.55
  -1  -2 -27   21.55    9.69
  -1  -2 -27   22.51   15.28
  -1   2 -28   22.65   18.74
  -1  -2 -28   36.55   10.83
  -1  -2 -28   45.56   16.77
   1   3 -27   15.27   18.39
   1  -3 -27   25.79    9.56
   1  -3 -27   18.64   19.42
  -1  -3  27   19.81    9.71
   1   3 -26    9.68   17.34
   1  -3 -26    5.64    8.28
   1  -3 -26   18.25   16.80
  -1  -3  26    4.31   13.23
   1   3 -25   54.23   18.81
   1  -3 -25   35.78   13.21
   1  -3 -25   42.81   18.54
  -1  -3  25   35.58    9.09
   1   3 -24   40.81   17.49
   1  -3 -24   33.90    7.92
   1  -3 -24   30.35   17.45
  -1  -3  24   32.70   13.50
  -1  -3  24   29.34    8.42
   1   3 -23    2.22   14.43
   1  -3 -23    2.67    6.83
   1  -3 -23    9.25   14.91
  -1  -3  23    3.69    8.80
  -1  -3  23   17.43   11.02
   1   3 -22   22.04   14.68
   1  -3 -22    1.62    6.76
   1  -3 -22   -5.38   14.56
  -1  -3  22   15.27   14.23
  -1  -3  22   19.71    6.78
   1   3 -21    3.03   13.15
   1  -3 -21    2.70    6.37
   1  -3 -21    1.79   13.55
  -1  -3  21    3.97    8.64
  -1  -3  21    4.07    6.23
   1   3 -20    0.81   12.39
   1  -3 -20   30.80   13.46
  -1  -3  20    7.81    6.93
   1   3 -19   21.14   12.64
   1  -3 -19   23.87    3.45
   1  -3 -19   42.59   14.06
  -1  -3  19   32.20    7.48
   1   3 -18    5.19   17.22
   1  -3 -18    5.39    4.02
   1  -3 -18   -6.66   12.38
  -1  -3  18   12.73   10.19
   1   3 -17   15.15   16.46
   1  -3 -17    7.12    5.55
   1  -3 -17   21.32   18.89
  -1  -3  17   -2.35    6.55
   1   3 -16   28.95   17.89
   1  -3 -16   15.23    6.12
   1  -3 -16   28.26   20.33
  -1  -3  16   30.65    9.92
   1   3 -15    3.84   10.88
   1  -3 -15   27.31    6.72
   1  -3 -15   16.05   12.80
  -1  -3  15   18.94    6.72
   1   3 -14  344.60   21.01
   1  -3 -14  370.02   16.06
   1  -3 -14  342.49   23.19
  -1  -3  14  332.77   18.78
   1   3 -13   97.50   12.88
   1  -3 -13  132.17   10.40
   1  -3 -13   98.77   14.80
  -1  -3  13  128.43    9.25
   1   3 -12   80.88   17.69
   1  -3 -12  116.55   20.32
  -1  -3  12   90.25   12.84
   1   3 -11  350.01   18.67
  -1   3  11  328.89   16.09
  -1  -3  11  366.07   15.01
   1  -3 -11  361.51   20.95
   1   3 -10    5.90   13.14
  -1   3  10   26.21    7.68
  -1  -3  10   22.26    6.77
   1  -3 -10   14.15   14.49
   1   3  -9  287.11   16.82
  -1   3   9  291.96   21.15
  -1  -3   9  306.91   19.10
   1  -3  -9  272.47   17.12
   1   3  -8   58.09   13.73
  -1   3   8   60.98   13.14
  -1  -3   8   61.50    7.37
   1  -3  -8   44.30   15.11
   1   3  -7   79.15    9.93
  -1   3   7   84.46    9.72
  -1  -3   7   72.86    7.83
   1  -3  -7   79.91    9.93
   1   3  -6  553.66   29.22
  -1   3   6  543.27   22.93
  -1  -3   6  576.97   21.41
   1  -3  -6  561.74   23.08
   1   3  -5   -1.92    7.56
  -1   3   5   18.08    7.60
  -1  -3   5   12.82    6.68
   1  -3  -5   23.36   12.42
   1   3  -4   12.65    6.92
  -1   3   4   -2.72    7.24
  -1  -3   4   -2.65    9.84
   1  -3  -4    5.22    7.39
   1   3  -3  410.93   18.64
  -1   3   3  393.97   18.64
  -1  -3   3  425.33   22.85
   1  -3  -3  401.15   18.93
   1   3  -2  132.04   10.15
  -1   3   2  105.82   10.34
   1  -3  -2  132.82   11.02
  -1  -3   2  140.53   15.45
   1   3  -1   67.03    8.40
  -1   3   1   53.18    8.81
   1  -3  -1   68.51    8.94
  -1  -3   1   79.07   12.51
   1   3   0   43.54    7.75
  -1   3   0   42.89    8.44
   1  -3   0   40.60    8.31
  -1  -3   0   73.05   12.54
   1   3   1  119.53   10.09
  -1   3  -1  109.63   11.00
   1  -3   1  134.99   10.42
  -1  -3  -1  176.67   15.59
   1   3   2  413.90   18.02
  -1   3  -2  399.73   19.21
   1  -3   2  426.71   18.50
  -1  -3  -2  511.02   25.72
   1   3   3  152.93   10.86
   1  -3   3  156.95   11.30
  -1   3  -4 5701.75  305.65
   1   3   4 5745.72  279.57
   1  -3   4 5867.42  281.53
  -1  -3  -4 5842.81  310.86
  -1   3  -5 1523.20   58.99
   1   3   5 1515.92   54.56
   1  -3   5 1569.89   53.97
  -1  -3  -5 1425.51   64.59
  -1   3  -6  247.83   14.28
   1   3   6  248.97   13.31
   1  -3   6  219.23   18.24
  -1  -3  -6  248.59   14.05
   1   3   7    5.37    6.99
  -1   3  -7    6.74   12.34
   1  -3   7   -1.90   10.24
  -1  -3  -7   13.93    5.36
  -1  -3  -7    7.65    7.29
   1   3   8   29.55    7.35
  -1   3  -8   21.69    9.09
   1  -3   8   34.11    7.46
  -1  -3  -8   25.74    8.90
  -1  -3  -8   47.97   12.89
   1   3   9    4.16    6.51
  -1   3  -9    5.86    8.06
  -1  -3  -9    6.23    4.91
  -1  -3  -9    3.17    7.83
   1   3  10   -1.13   10.20
  -1   3 -10    4.95    8.06
   1  -3  10   -1.19    6.22
  -1  -3 -10    2.42    7.12
  -1  -3 -10   -2.54   12.42
   1   3  11    5.68    6.46
  -1   3 -11    8.39   13.09
   1  -3  11    4.74    6.72
  -1  -3 -11    6.08    4.69
  -1  -3 -11   -3.10    8.58
  -1   3 -12   21.79    9.12
  -1  -3 -12   20.04    4.74
   1  -3  12   17.33    6.83
  -1  -3 -12    8.81   10.11
  -1   3 -13   65.13   11.43
  -1  -3 -13   70.24    8.46
   1  -3  13   50.30   11.39
  -1  -3 -13   52.89   18.09
  -1   3 -14   61.62   19.37
  -1  -3 -14   62.07    8.08
   1  -3  14   67.17    8.33
  -1  -3 -14   60.54   12.74
  -1   3 -15  471.39   26.82
  -1  -3 -15  479.50   14.17
   1  -3  15  464.34   24.43
  -1  -3 -15  500.94   28.61
  -1   3 -16  537.48   29.83
  -1  -3 -16  534.24   15.25
   1  -3  16  527.41   20.75
  -1  -3 -16  534.82   42.27
  -1   3 -17    1.19   10.75
  -1  -3 -17    2.02    2.90
   1  -3  17   -0.72    6.10
  -1  -3 -17   -7.10   16.80
  -1   3 -18   16.96   11.32
  -1  -3 -18    4.77    2.63
   1  -3  18    5.49    6.46
  -1  -3 -18  -11.23   11.30
  -1   3 -19   89.83   16.18
   1  -3  19   79.32   12.32
  -1  -3 -19   89.29   15.83
  -1   3 -20   36.37   23.45
  -1  -3 -20   58.82    7.47
   1  -3  20   66.98    8.45
  -1  -3 -20   55.71   15.25
  -1   3 -21  157.07   30.45
  -1  -3 -21  133.36    9.82
   1  -3  21  152.01   16.58
  -1  -3 -21  154.41   18.96
  -1   3 -22   53.37   25.99
  -1  -3 -22   65.14    8.25
   1  -3  22   75.00    8.99
  -1  -3 -22   74.41   17.29
  -1   3 -23    7.25   22.44
  -1  -3 -23    2.82    6.72
   1  -3  23   13.52    7.39
  -1  -3 -23   11.29   14.31
  -1   3 -24   31.58   27.04
  -1  -3 -24   49.12   12.75
   1  -3  24   59.51   13.17
  -1  -3 -24   52.06   17.12
  -1   3 -25   11.39   24.35
  -1  -3 -25    7.56    7.55
   1  -3  25    6.21    8.15
  -1  -3 -25   25.91   15.65
  -1   3 -26  -23.77   24.86
  -1  -3 -26   -5.47    7.65
   1  -3  26    7.42    7.82
  -1  -3 -26   10.74   15.57
  -1   3 -27  -13.91   27.50
  -1  -3 -27   -6.42   12.91
   1  -3  27   34.46   13.60
  -1  -3 -27   -1.99   17.46
   1   4 -25   11.30   20.22
   1  -4 -25   13.44   13.72
   1  -4 -25   74.64   31.52
  -1  -4  25   16.20    9.31
   1   4 -24    1.69   17.83
   1  -4 -24    1.59    7.91
   1  -4 -24   -2.15   18.24
  -1  -4  24    1.98   12.90
  -1  -4  24   -2.88    7.97
   1   4 -23   -0.52   16.81
   1  -4 -23   13.21   17.05
  -1  -4  23   11.34   20.69
  -1  -4  23   -0.47   12.70
   1   4 -22   58.04   19.91
   1  -4 -22   38.39   20.57
  -1  -4  22   67.52   15.50
  -1  -4  22   51.55   10.23
   1   4 -21   55.95   20.23
   1  -4 -21  102.24   20.97
  -1  -4  21   77.19   15.37
   1   4 -20   18.87   15.29
   1  -4 -20   -1.15    5.74
   1  -4 -20  -14.35   15.24
  -1  -4  20    0.24    7.74
   1   4 -19   51.38   18.48
   1  -4 -19   89.80   18.67
  -1  -4  19   86.44   10.16
   1   4 -18   99.10   28.90
   1  -4 -18   92.22   11.41
   1  -4 -18  125.96   20.60
  -1  -4  18  128.93   11.51
   1   4 -17   25.91   21.38
   1  -4 -17    1.83    8.69
   1  -4 -17   20.77   21.59
  -1  -4  17    3.18    7.70
   1   4 -16  258.27   24.28
   1  -4 -16  284.23   13.43
   1  -4 -16  289.87   26.29
  -1  -4  16  296.27   23.89
   1   4 -15  420.58   29.63
   1  -4 -15  495.45   19.52
   1  -4 -15  456.72   33.01
  -1  -4  15  460.32   22.93
   1   4 -14  408.08   30.19
   1  -4 -14  494.38   25.15
   1  -4 -14  480.34   31.37
  -1  -4  14  499.97   31.79
  -1   4  13  359.96   21.75
   1   4 -13  383.27   36.68
   1  -4 -13  402.21   39.66
  -1  -4  13  418.14   20.93
   1  -4 -13  438.10   18.43
   1   4 -12   76.93   15.01
  -1   4  12   73.74   12.47
  -1  -4  12   79.66   10.91
   1  -4 -12   70.66   15.56
   1   4 -11   18.39   12.01
  -1   4  11   16.73   10.43
  -1  -4  11   26.30    8.52
   1  -4 -11   11.93   12.43
   1   4 -10   59.72   18.80
  -1   4  10   50.90   11.66
  -1  -4  10   57.54   10.39
   1  -4 -10   42.83   20.16
   1   4  -9   64.36   12.36
  -1   4   9   68.38   18.62
  -1  -4   9   55.30   14.42
   1  -4  -9   47.06   12.88
   1   4  -8   -9.35   14.50
  -1   4   8    2.89    9.07
  -1  -4   8    3.92    7.96
   1  -4  -8    5.94   15.85
   1   4  -7   51.10   11.86
  -1   4   7   68.73   11.79
  -1  -4   7   46.74    9.56
   1  -4  -7   52.36   12.25
   1   4  -6  -28.77   15.54
   1  -4  -6   16.84   16.23
  -1  -4   6  -14.53   12.71
   1   4  -5  329.53   19.87
  -1   4   5  321.44   27.96
  -1  -4   5  343.84   18.05
   1  -4  -5  331.07   20.96
   1   4  -4   -1.59    9.73
  -1   4   4   32.32    9.90
  -1  -4   4   18.44    8.49
   1  -4  -4   19.21    9.94
  -1   4   3   20.10   10.16
  -1  -4   3   22.98   14.33
   1  -4  -3   53.41   16.81
   1   4  -2   89.17   11.77
   1  -4  -2   92.61   12.66
  -1  -4   2  136.62   19.21
   1   4  -1  236.25   16.35
   1  -4  -1  259.25   17.64
  -1  -4   1  250.46   16.19
   1   4   0  240.85   16.34
  -1   4   0  185.27   16.31
   1  -4   0  269.65   17.16
  -1  -4   0  202.41   14.95
   1   4   1  342.07   26.84
   1  -4   1  343.08   28.59
   1   4   2  464.23   33.54
  -1   4  -2  425.49   35.78
  -1  -4  -2  469.09   34.26
   1   4   3  466.43   23.84
  -1   4  -3  454.33   26.98
   1  -4   3  517.56   24.69
  -1  -4  -3  492.47   24.93
   1   4   4   42.65   10.20
  -1   4  -4   61.18   11.37
   1  -4   4   19.25   10.22
  -1  -4  -4   51.87   10.56
  -1   4  -5   28.09   18.29
   1   4   5   60.37   11.14
   1  -4   5   26.52   15.77
  -1  -4  -5   48.59   17.85
  -1   4  -6  234.22   18.18
   1   4   6  193.03   24.31
   1  -4   6  240.53   15.84
  -1  -4  -6  203.97   16.52
  -1   4  -7   65.77   12.91
   1   4   7   77.63   11.80
   1  -4   7   70.32   10.98
  -1  -4  -7   70.82   12.13
   1   4   8  -18.34    9.12
  -1   4  -8   13.56   10.31
   1  -4   8   10.53   13.35
  -1  -4  -8    5.65    6.65
  -1  -4  -8   -7.02    9.19
   1   4   9   75.09   16.94
  -1   4  -9   83.55   13.74
   1  -4   9   78.42   10.98
  -1  -4  -9   75.06   13.63
  -1  -4  -9   66.75   13.09
   1   4  10    2.03    9.11
  -1   4 -10  -10.24   10.88
   1  -4  10   12.90    8.05
  -1  -4 -10   -8.23    6.65
  -1  -4 -10   13.88    9.89
   1   4  11   49.37   10.55
  -1   4 -11   45.60   19.97
   1  -4  11   43.16   16.28
  -1  -4 -11   42.56    7.83
  -1  -4 -11   39.53   12.79
   1   4  12  419.02   29.80
  -1   4 -12  472.73   29.25
   1  -4  12  475.13   23.59
  -1  -4 -12  501.22   19.76
  -1  -4 -12  478.92   28.35
   1   4  13   76.04   11.14
  -1   4 -13   75.54   15.57
   1  -4  13   66.40   17.65
  -1  -4 -13   99.96   13.43
  -1  -4 -13   82.11   23.31
  -1   4 -14  699.88   55.11
  -1  -4 -14  769.25   27.36
   1  -4  14  744.21   32.93
  -1  -4 -14  747.32   40.81
  -1   4 -15  146.83   18.94
  -1  -4 -15  148.25   13.60
   1  -4  15  146.00   18.87
  -1  -4 -15  124.60   18.97
  -1   4 -16   32.27   15.41
  -1  -4 -16   51.79    7.31
   1  -4  16   51.31    9.95
  -1  -4 -16   41.70   15.45
  -1   4 -17  165.04   21.50
  -1  -4 -17  171.40    9.39
   1  -4  17  172.05   18.57
  -1  -4 -17  180.15   31.27
  -1   4 -18  207.81   25.29
  -1  -4 -18  212.38   13.84
   1  -4  18  234.75   15.13
  -1  -4 -18  198.46   34.15
  -1   4 -19   78.12   28.15
  -1  -4 -19   48.91    7.82
   1  -4  19   53.02   15.59
  -1  -4 -19   50.27   16.82
  -1   4 -20   36.99   27.34
  -1  -4 -20   28.46    7.08
   1  -4  20   41.81    9.40
  -1  -4 -20   20.34   16.96
  -1   4 -21    5.84   15.44
  -1  -4 -21    1.26    5.02
   1  -4  21    6.59   13.10
  -1  -4 -21   -1.43   15.07
  -1   4 -22   18.10   16.17
   1  -4  22   -3.60    7.85
  -1  -4 -22   -2.79   16.05
  -1   4 -23   23.57   17.48
  -1  -4 -23   -3.44    7.20
   1  -4  23    3.65    8.72
  -1  -4 -23    7.87   16.01
  -1   4 -24    0.19   19.26
  -1  -4 -24    0.44   12.24
   1  -4  24   20.34   13.39
  -1  -4 -24    9.91   17.99
  -1   4 -25   31.36   21.70
  -1  -4 -25   31.33    9.24
   1  -4  25   39.87   10.07
  -1  -4 -25   38.60   20.89
   1   5 -22   55.60   37.62
   1  -5 -22  105.94   38.52
  -1  -5  22   80.57   21.66
  -1  -5  22   66.42   12.90
   1   5 -21   13.03   20.99
   1  -5 -21   27.02   30.14
  -1  -5  21   44.63   16.51
  -1  -5  21    4.15   10.78
   1   5 -20   12.53   18.88
   1  -5 -20   21.88   11.76
   1  -5 -20    6.02   19.43
  -1  -5  20   14.98   15.95
   1   5 -19   11.70   18.63
   1  -5 -19    7.17   11.47
   1  -5 -19   35.64   18.10
  -1  -5  19    8.67    9.97
   1   5 -18   11.08   17.72
   1  -5 -18    2.78    7.88
   1  -5 -18   19.14   17.52
  -1  -5  18   23.21   14.31
   1   5 -17  199.81   26.37
   1  -5 -17  199.33   14.04
   1  -5 -17  191.57   26.33
  -1  -5  17  163.08   16.47
   1   5 -16    7.33   25.64
   1  -5 -16   35.47   13.82
   1  -5 -16   38.11   26.55
  -1  -5  16   15.51   10.49
  -1   5  15   12.85   10.57
   1   5 -15  -17.35   14.96
   1  -5 -15   33.28   16.05
  -1  -5  15   19.65    9.76
   1  -5 -15   -7.76    8.69
  -1   5  14  121.99   15.98
   1   5 -14  143.28   21.17
   1  -5 -14  145.08   22.15
  -1  -5  14  133.74   14.86
   1  -5 -14  146.31   20.72
  -1   5  13   29.83   13.17
   1   5 -13   32.33   16.19
   1  -5 -13   58.57   15.94
  -1  -5  13   35.57   12.13
   1  -5 -13   44.30   10.77
   1   5 -12  329.03   41.67
  -1   5  12  320.43   23.23
  -1  -5  12  390.06   23.14
   1  -5 -12  346.60   42.48
   1   5 -11   11.95   14.06
  -1   5  11   19.52   12.04
  -1  -5  11    6.88   10.48
   1  -5 -11   14.51   14.87
   1   5 -10   38.34   14.99
  -1   5  10   30.89   19.02
  -1  -5  10   61.26   17.42
   1  -5 -10   41.17   23.07
   1   5  -9   52.25   15.51
  -1   5   9   41.80   13.56
  -1  -5   9   68.52   12.71
   1  -5  -9   62.16   15.51
   1   5  -8   17.53   12.52
  -1   5   8   13.28   18.29
  -1  -5   8  -26.33   14.66
   1  -5  -8   -5.87   12.54
   1   5  -7  146.67   29.02
  -1   5   7  186.07   18.61
   1  -5  -7  192.64   20.88
  -1  -5   7  191.49   16.97
   1   5  -6   15.08   15.04
   1  -5  -6   68.85   15.52
  -1  -5   6   73.16   22.02
   1   5  -5 1090.19   73.69
  -1   5   5 1097.55   69.64
   1  -5  -5 1051.79   77.09
  -1  -5   5 1165.19   55.00
   1   5  -4  170.54   22.15
   1  -5  -4  242.14   31.74
  -1  -5   4  243.70   20.99
   1   5  -3  381.92   25.35
  -1   5   3  404.85   38.59
   1  -5  -3  370.98   26.17
  -1  -5   3  349.48   34.47
  -1   5   2  244.51   22.67
   1  -5  -2  235.50   23.14
   1   5  -1  713.57   38.44
  -1   5   1  608.89   37.26
   1  -5  -1  667.05   37.83
  -1  -5   1  758.09   49.38
   1   5   0  914.60   61.58
  -1   5   0  855.15   61.40
   1  -5   0  927.21   61.53
  -1  -5   0  875.07   45.42
  -1   5  -1  108.55   17.81
   1   5   1   98.58   15.11
   1  -5   1  100.74   16.19
   1   5   2  204.58   19.67
  -1   5  -2  223.96   31.92
   1  -5   2  192.04   29.91
  -1  -5  -2  272.49   28.91
  -1   5  -3  106.83   17.81
  -1  -5  -3   77.15   15.52
   1  -5   3  130.31   16.70
   1   5   4  334.11   22.25
  -1   5  -4  264.45   25.93
   1  -5   4  283.16   22.90
  -1  -5  -4  334.30   34.68
  -1   5  -5   58.54   17.86
   1   5   5   45.95   13.28
   1  -5   5  125.37   22.86
  -1   5  -6   14.95   14.36
   1   5   6  -29.79   11.93
   1  -5   6   -7.89   11.53
   1   5   7  398.02   25.33
  -1   5  -7  392.58   28.47
   1  -5   7  403.61   35.11
  -1  -5  -7  397.48   21.61
  -1  -5  -7  406.77   28.62
   1   5   8   35.54   18.64
  -1   5  -8   -9.48   22.91
   1  -5   8   29.88   12.34
  -1  -5  -8   18.90    9.86
  -1  -5  -8   45.25   21.66
   1   5   9   54.32   13.40
  -1   5  -9   56.52   16.28
   1  -5   9   41.27   13.08
  -1  -5  -9   86.52   17.19
  -1  -5  -9   43.21   15.34
   1   5  10  113.10   14.61
  -1   5 -10  100.00   29.38
   1  -5  10  117.81   16.10
  -1  -5 -10  139.11   12.65
  -1  -5 -10  113.93   26.91
   1   5  11   22.85   18.68
  -1   5 -11   28.57   15.87
   1  -5  11   11.05   12.64
  -1  -5 -11   51.30    9.99
  -1  -5 -11   47.55   14.51
   1   5  12   54.41   12.91
  -1   5 -12   68.23   17.54
   1  -5  12   57.90   20.06
  -1  -5 -12   65.70   15.85
  -1  -5 -12   42.81   16.13
   1   5  13   11.04   16.95
  -1   5 -13   12.23   23.75
   1  -5  13  -10.00   10.56
  -1  -5 -13   14.74    8.26
  -1  -5 -13   -1.22   20.63
   1   5  14  240.29   19.73
  -1   5 -14  289.40   27.91
   1  -5  14  235.61   30.08
  -1  -5 -14  296.76   24.21
  -1  -5 -14  277.73   26.40
  -1   5 -15   -3.64   15.27
  -1  -5 -15    5.39    8.14
   1  -5  15   -1.42   10.50
  -1  -5 -15   -0.25   14.10
  -1   5 -16  126.49   23.22
  -1  -5 -16  143.15   18.24
   1  -5  16  129.32   23.50
  -1  -5 -16  101.16   32.48
  -1   5 -17   76.75   32.02
  -1  -5 -17   62.62   10.01
   1  -5  17   68.74   13.54
  -1  -5 -17   85.29   28.61
  -1   5 -18   39.22   27.64
  -1  -5 -18   14.11   11.06
   1  -5  18    5.24   11.07
  -1  -5 -18   10.36   16.84
  -1   5 -19    4.14   18.79
  -1  -5 -19    9.70   12.09
   1  -5  19   19.65    9.88
  -1  -5 -19   29.55   17.27
  -1   5 -20   20.36   19.66
  -1  -5 -20   18.61    6.72
   1  -5  20    2.44   10.53
  -1  -5 -20   38.43   18.28
  -1   5 -21   57.59   22.39
   1  -5  21   27.60   17.06
  -1  -5 -21   31.40   20.12
  -1   5 -22  115.38   26.46
   1  -5  22   89.24   13.88
  -1  -5 -22  110.30   37.30
   1   6 -18   10.67   21.50
   1  -6 -18   17.58   16.48
   1  -6 -18   22.44   21.20
   1   6 -17   13.38   19.90
   1  -6 -17    9.84   10.90
   1  -6 -17    6.62   19.69
  -1  -6  17    6.16   12.18
   1   6 -16   16.90   19.93
   1  -6 -16   20.98   17.58
   1  -6 -16  -14.58   20.26
  -1  -6  16   15.53   12.93
  -1   6  15   59.51   14.53
   1   6 -15   55.83   21.84
   1  -6 -15   52.85   32.04
  -1  -6  15   39.38   14.09
   1  -6 -15   63.89   13.50
  -1   6  14   14.73   22.35
   1   6 -14   11.39   30.39
   1  -6 -14   13.44   29.50
  -1  -6  14   17.74   20.84
   1  -6 -14   34.57   12.23
  -1   6  13   82.95   17.01
   1   6 -13   78.59   23.26
   1  -6 -13   86.30   23.51
  -1  -6  13   86.40   15.95
   1  -6 -13  118.51   22.87
  -1   6  12  -16.76   21.33
   1   6 -12   13.02   17.53
   1  -6 -12    1.27   17.41
  -1  -6  12   18.62   20.50
   1  -6 -12   10.12   11.63
   1   6 -11   43.01   28.23
  -1   6  11   16.88   14.46
  -1  -6  11   31.67   13.62
   1  -6 -11   50.45   27.86
   1   6 -10   36.32   16.71
  -1   6  10   14.10   21.94
  -1  -6  10    5.45   18.26
   1  -6 -10  -11.93   16.87
   1   6  -9   21.64   16.66
  -1   6   9    5.79   13.39
  -1  -6   9   -0.72   12.38
   1  -6  -9    8.05   15.97
   1   6  -8  -34.49   26.73
  -1   6   8   48.92   23.79
   1  -6  -8    3.61   27.52
  -1  -6   8   36.50   20.73
   1   6  -7   87.86   25.37
  -1   6   7  159.29   21.07
   1  -6  -7  228.30   25.70
  -1  -6   7  152.18   21.90
   1   6  -6  263.90   44.06
  -1   6   6  388.80   42.09
   1  -6  -6  291.77   46.81
  -1  -6   6  325.81   37.75
   1   6  -5   17.78   18.03
   1  -6  -5   62.44   18.87
  -1  -6   5   14.00   15.84
   1   6  -4  209.73   25.47
  -1   6   4  269.68   25.28
   1  -6  -4  200.10   26.14
  -1  -6   4  249.05   33.26
   1   6  -3   80.55   18.09
   1  -6  -3   65.20   18.59
  -1  -6   3   59.45   17.03
   1   6  -2   34.50   17.97
  -1   6   2   42.68   17.02
   1  -6  -2   58.58   17.19
  -1  -6   2   34.48   24.28
  -1   6   1   32.11   16.90
  -1  -6   1   97.78   18.50
   1   6   0  520.70   37.60
  -1   6   0  531.76   39.26
   1  -6   0  580.51   41.39
  -1  -6   0  604.15   52.67
   1   6   1   89.66   17.97
   1  -6   1   93.48   19.35
   1   6   2  110.34   18.69
  -1   6  -2  102.89   19.90
   1  -6   2  108.25   19.48
  -1  -6  -2  101.39   28.82
   1   6   3   34.71   15.32
  -1   6  -3   49.04   17.80
  -1  -6  -3   41.00   16.12
   1   6   4   54.06   24.90
  -1   6  -4   16.39   27.91
   1  -6   4   32.76   16.30
  -1  -6  -4   62.48   24.80
   1   6   5  153.82   20.59
  -1   6  -5  140.22   23.15
   1  -6   5  146.73   22.00
  -1  -6  -5  148.32   22.56
  -1   6  -6  -13.75   30.24
   1   6   6  106.35   26.55
  -1  -6  -6   48.18   13.50
  -1  -6  -6  122.74   27.96
   1  -6   6   30.26   17.30
  -1   6  -7   60.94   21.12
   1   6   7   73.93   17.21
  -1  -6  -7   92.88   15.03
  -1  -6  -7   56.16   20.15
   1  -6   7   98.58   17.49
  -1   6  -8   46.45   18.98
   1   6   8   13.25   23.47
  -1  -6  -8   80.04   20.25
  -1  -6  -8   39.55   18.09
   1  -6   8   21.95   16.59
   1   6   9   33.89   14.92
  -1   6  -9   15.97   19.98
   1  -6   9   21.69   15.23
  -1  -6  -9   35.51   18.36
  -1  -6  -9   27.62   25.65
   1   6  10   98.11   27.38
  -1   6 -10  149.01   25.12
   1  -6  10  111.52   20.05
  -1  -6 -10  177.51   16.82
  -1  -6 -10  123.15   23.94
   1   6  11   24.77   14.18
  -1   6 -11   16.12   28.35
   1  -6  11   38.88   13.93
  -1  -6 -11   28.72   12.06
  -1  -6 -11    4.31   18.05
   1   6  12   -1.22   19.07
  -1   6 -12    4.06   27.71
   1  -6  12   16.25   13.63
  -1  -6 -12   14.22   16.94
  -1  -6 -12   20.45   24.99
   1   6  13    5.92   12.54
  -1   6 -13   11.07   17.97
   1  -6  13   33.99   19.25
  -1  -6 -13    0.64   11.03
  -1  -6 -13    9.62   17.19
   1   6  14   17.55   19.78
  -1   6 -14  -22.90   21.10
   1  -6  14   40.33   14.01
  -1  -6 -14   41.08   18.27
  -1  -6 -14   30.68   18.53
   1   6  15   17.61   12.24
  -1   6 -15   15.57   30.13
   1  -6  15    9.53   18.86
  -1  -6 -15   10.23   10.45
  -1  -6 -15  -11.18   28.10
  -1   6 -16  -17.69   19.13
  -1  -6 -16    4.92   10.30
   1  -6  16    0.90   11.81
  -1  -6 -16   17.70   17.54
  -1   6 -17  -15.16   20.39
  -1  -6 -17    7.05   15.56
   1  -6  17   16.82   20.30
  -1  -6 -17   23.36   19.10
  -1   6 -18   13.27   22.05
  -1  -6 -18   18.39   10.74
   1  -6  18   -0.24   12.93
  -1  -6 -18   26.70   20.01
  -1   7  12  -15.91   24.46
   1   7 -12    1.55   31.32
   1  -7 -12   -5.36   32.12
  -1  -7  12   37.72   23.72
   1  -7 -12    4.27   22.49
  -1   7  11    3.80   15.19
   1   7 -11  -20.65   19.68
   1  -7 -11  -15.23   19.01
  -1  -7  11   -2.61   14.45
   1  -7 -11   15.64   13.64
  -1   7  10   29.04   26.62
   1   7 -10   51.04   22.19
   1  -7 -10   23.90   22.47
  -1  -7  10   16.11   24.39
   1  -7 -10   21.37   15.30
   1   7  -9  -16.95   30.05
  -1   7   9   16.03   16.97
   1  -7  -9   23.31   30.22
  -1  -7   9    8.33   15.90
   1   7  -8    5.05   18.59
  -1   7   8    7.46   24.38
   1  -7  -8   12.66   19.07
  -1  -7   8    2.66   14.34
   1   7  -7   -7.47   18.57
  -1   7   7   -4.39   15.58
   1  -7  -7  -18.12   18.26
  -1  -7   7   11.03   15.23
   1   7  -6  -15.54   27.31
  -1   7   6   10.13   16.61
   1  -7  -6   13.35   26.53
  -1  -7   6    5.20   15.33
   1   7  -5   22.31   18.65
  -1   7   5    6.56   17.69
   1  -7  -5   16.78   19.05
  -1  -7   5   24.33   26.07
   1   7  -4   10.95   17.86
  -1   7   4   -0.61   16.68
   1  -7  -4   19.81   18.29
  -1  -7   4    9.60   16.01
   1   7  -3   15.21   17.27
  -1   7   3   20.34   17.80
   1  -7  -3    5.67   17.73
  -1  -7   3   21.38   24.34
   1   7  -2   -1.13   16.88
  -1   7   2    1.29   16.90
   1  -7  -2   36.51   17.79
  -1  -7   2  -15.51   15.95
   1   7  -1   40.35   26.83
  -1   7   1   23.82   28.20
   1  -7  -1   13.36   28.28
  -1  -7   1   -2.93   26.13
   1   7   0   36.66   19.18
  -1   7   0   72.26   20.19
   1  -7   0   27.83   20.05
  -1  -7   0   46.70   19.46
   1   7   1   39.59   28.17
  -1   7  -1   22.71   29.41
   1  -7   1   31.60   29.51
  -1  -7  -1   17.13   18.12
  -1   7  -2   -2.07   18.23
   1   7   2   28.12   16.89
  -1  -7  -2  -22.77   13.86
  -1  -7  -2   40.94   26.73
   1  -7   2   18.28   17.54
  -1   7  -3   76.84   22.44
   1   7   3   85.69   31.91
  -1  -7  -3   58.75   17.26
  -1  -7  -3   94.03   21.53
   1  -7   3   63.61   21.66
  -1   7  -4   67.00   32.87
   1   7   4   47.76   19.33
  -1  -7  -4   67.53   16.44
  -1  -7  -4   50.76   32.07
   1  -7   4   65.99   20.18
  -1   7  -5   -8.41   18.16
   1   7   5  -21.89   15.72
  -1  -7  -5   12.10   13.25
  -1  -7  -5   14.36   16.52
   1  -7   5    3.35   16.52
  -1   7  -6    0.05   28.39
   1   7   6   -0.70   15.62
  -1  -7  -6  -23.31   21.55
  -1  -7  -6    9.37   17.00
   1  -7   6  -23.89   24.76
  -1   7  -7   36.11   19.25
   1   7   7  -11.84   15.38
  -1  -7  -7  -23.39   19.82
  -1  -7  -7   -4.06   26.92
   1  -7   7   -8.14   16.38
  -1   7  -8   33.94   22.71
   1   7   8   67.87   18.59
  -1  -7  -8   44.50   16.48
  -1  -7  -8   57.68   21.54
   1  -7   8   -0.43   30.18
  -1   7  -9   42.46   31.09
   1   7   9   -3.74   17.12
  -1  -7  -9   27.46   14.51
  -1  -7  -9    8.21   19.51
   1  -7   9    5.95   16.39
  -1   7 -10  -32.57   20.64
   1   7  10   -2.99   15.01
  -1  -7 -10   -5.22   13.76
  -1  -7 -10   20.76   28.48
   1  -7  10   -4.59   25.43
  -1   7 -11   33.48   21.64
   1   7  11    4.02   15.91
  -1  -7 -11  -11.33   20.89
  -1  -7 -11    6.08   19.99
   1  -7  11   26.97   16.26
  -1   7 -12  -14.65   21.13
   1   7  12  -16.71   22.24
  -1  -7 -12    3.56   13.13
  -1  -7 -12    0.49   19.73
   1  -7  12   -4.98   15.59
   2   0 -29   18.39   19.77
   2   0 -28   17.96   12.50
   2   0 -27   -1.62   10.80
   2   0 -26  136.05   15.65
   2   0 -25   -6.61    9.96
   2   0 -24    8.15   12.96
   2   0 -23    0.41    7.73
   2   0 -22  288.66   15.35
   2   0 -21    6.11    7.16
   2   0 -20  440.51   24.17
   2   0 -19    0.17    8.69
   2   0 -18   73.20    7.34
   2   0 -17   11.22    5.18
   2   0 -16  344.46   12.04
   2   0 -15    4.98    6.94
   2   0 -14   13.89    6.23
   2   0 -13   -0.97    3.51
   2   0 -12 1060.41   25.83
   2   0 -11   -1.38    3.10
   2   0 -10 9513.89  472.85
   2   0  -9   -4.92    2.59
   2   0  -8  754.31   15.68
   2   0  -7   -1.18    1.65
   2   0  -7    0.68    2.20
   2   0  -6 1736.56   36.40
   2   0  -6 1834.98   43.49
   2   0  -5   -0.39    1.17
   2   0  -5    2.23    1.96
   2   0  -4  444.09    7.37
   2   0  -4  451.28    9.18
  -2   0   4  444.45    6.34
   2   0  -3   -0.81    1.06
   2   0  -3    0.22    1.21
  -2   0   3   -1.67    1.00
   2   0  -2  483.58    7.15
   2   0   1    2.09    0.93
  -2   0  -1    3.51    1.45
   2   0   2  407.16    5.27
  -2   0  -2  399.34    5.71
   2   0   3    1.65    1.70
  -2   0  -3   -0.64    1.87
   2   0   4  515.24    8.34
  -2   0  -4  533.16   10.72
   2   0   5   -1.11    2.82
  -2   0  -5   -0.56    1.95
   2   0   6 3945.45  115.11
  -2   0  -6 3837.78  115.47
   2   0   7   -0.74    1.98
  -2   0  -7    2.41    2.19
   2   0   8  944.07   16.65
   2   0   8  972.20   21.60
  -2   0  -8  944.81   20.23
   2   0   9    0.86    1.95
   2   0   9   -1.14    2.18
  -2   0  -9   -0.92    2.55
   2   0  10  708.82   13.06
   2   0  10  695.99   14.77
  -2   0 -10  688.47   15.69
   2   0  11   -2.51    2.03
  -2   0 -11   -0.63    3.03
   2   0  12    0.98    2.10
  -2   0 -12    3.45    4.90
   2   0  13   -0.41    1.87
  -2   0 -13    6.65    5.85
   2   0  14  561.21   11.01
  -2   0 -14  553.69   15.75
   2   0  15   -0.75    2.22
  -2   0 -15    0.54    4.35
   2   0  16   39.16    2.79
  -2   0 -16   45.07    5.86
   2   0  17   -1.47    2.30
  -2   0 -17    8.38    5.13
   2   0  18  430.36    9.46
  -2   0 -18  439.41   16.14
   2   0  19   -2.14    2.42
  -2   0 -19    5.18    9.26
   2   0  20  124.79    4.38
  -2   0 -20  147.27   16.30
  -2   0 -21   -1.30    7.51
  -2   0 -22   58.92    9.57
  -2   0 -23    5.22    8.34
  -2   0 -24   53.86   16.18
  -2   0 -25    9.21   15.79
  -2   0 -26  238.06   19.25
  -2   0 -27    8.81   11.42
  -2   0 -28    6.84   12.12
  -2   0 -29   11.29   12.92
   2   1 -29   18.33   14.61
   2  -1 -29    1.35   11.23
   2  -1 -29   -2.89   15.84
   2   1 -28   81.70   18.09
   2  -1 -28   76.87   13.32
   2  -1 -28   80.93   18.56
   2   1 -27    4.71   13.80
   2  -1 -27   19.68   15.70
   2  -1 -27   11.04   22.56
   2   1 -26   17.33   20.58
   2  -1 -26    6.43    9.18
   2  -1 -26   49.09   19.35
   2   1 -25   18.88   17.04
   2  -1 -25    3.77    8.15
   2  -1 -25   22.77   18.59
   2   1 -24   21.40   11.58
   2  -1 -24   27.23    8.24
   2  -1 -24   38.85   12.67
   2   1 -23   25.60    9.97
   2  -1 -23   17.40   10.92
   2  -1 -23   12.16   11.68
   2   1 -22   11.59    8.92
   2  -1 -22    5.41    6.33
   2  -1 -22    0.03   10.50
   2   1 -21   24.48    9.27
   2  -1 -21   17.23    6.68
   2  -1 -21   38.85   10.66
   2   1 -20   32.68    9.41
   2  -1 -20   45.09   10.47
   2  -1 -20   32.50   10.85
   2   1 -19  739.31   29.25
   2  -1 -19  734.26   23.67
   2  -1 -19  823.20   34.00
   2   1 -18  138.07   16.31
   2  -1 -18  114.68    8.02
   2  -1 -18  121.50   12.69
  -2  -1  18  114.09    7.87
   2   1 -17  853.83   37.10
   2  -1 -17  827.73   29.92
   2  -1 -17  812.38   31.94
  -2  -1  17  824.66   24.03
   2   1 -16    2.17   10.39
   2  -1 -16   12.79    4.57
   2  -1 -16    7.88    7.87
  -2  -1  16    3.78    2.84
  -2  -1  16    6.56    7.26
   2   1 -15   30.69    9.33
   2  -1 -15   22.12    4.62
   2  -1 -15   13.35    8.10
  -2  -1  15   28.00    3.42
  -2  -1  15   26.10    4.62
   2   1 -14  579.75   23.37
   2  -1 -14  630.91   20.59
   2  -1 -14  650.09   22.84
  -2  -1  14  607.07   14.61
  -2  -1  14  633.81   16.23
   2   1 -13    4.20    6.89
   2  -1 -13    4.56    3.67
   2  -1 -13   -3.15    6.11
  -2  -1  13    4.38    3.19
  -2  -1  13    2.33    5.09
   2   1 -12   89.62    9.45
   2  -1 -12   79.43    7.43
  -2  -1  12   68.04    4.67
  -2  -1  12   75.31    4.43
   2   1 -11  394.26   16.31
   2  -1 -11  361.71   13.17
  -2  -1  11  349.19   10.71
  -2  -1  11  372.43    9.50
   2   1 -10  225.44    8.51
   2  -1 -10  213.88   13.27
  -2  -1  10  204.37    6.01
  -2  -1  10  220.56    8.96
   2   1  -9  448.18   12.68
   2  -1  -9  456.10   14.45
  -2  -1   9  430.84   10.08
  -2  -1   9  441.43   10.17
   2   1  -8   19.15    3.95
   2  -1  -8   29.96    5.47
  -2  -1   8   18.91    4.70
   2   1  -7 1033.81   29.78
   2  -1  -7 1079.18   34.77
  -2  -1   7  946.32   21.90
  -2  -1   7  933.99   20.33
   2   1  -6   61.88    4.65
   2  -1  -6   73.14    6.40
  -2  -1   6   75.16    3.99
  -2  -1   6   76.81    3.71
   2   1  -5  531.61   13.21
  -2   1   5  484.85   17.24
   2  -1  -5  531.69   16.07
  -2  -1   5  530.92   11.51
  -2  -1   5  513.03   12.41
   2   1  -4  850.96   20.12
  -2   1   4  840.00   21.72
   2  -1  -4  855.82   23.58
  -2  -1   4  825.74   17.85
  -2  -1   4  850.08   19.79
   2   1  -3 3646.30  117.65
  -2   1   3 3607.24  130.21
   2  -1  -3 3889.59  142.21
  -2  -1   3 3857.92  124.76
  -2  -1   3 3846.66  129.98
   2   1  -2  257.71    7.86
   2   1  -2  274.30    7.42
  -2   1   2  276.35   13.30
   2  -1  -2  291.40   13.24
  -2  -1   2  287.06    9.39
  -2  -1   2  267.41    7.74
   2   1  -1   21.37    4.01
   2   1  -1   17.32    3.21
  -2  -1   1   12.94    3.84
  -2  -1   1   10.03    2.99
   2   1   034741.94 3603.39
  -2   1   034531.35 3629.83
   2   1   034205.79 3518.18
  -2  -1   033801.15 3510.94
  -2  -1   035028.42 3594.29
   2  -1   035716.41 3737.13
   2   1   1 3081.51   91.87
   2   1   1 2998.02   86.21
  -2   1  -1 3014.61   93.68
   2  -1   1 3025.77   92.49
  -2  -1  -1 3043.30   89.64
  -2  -1  -1 3124.35   89.13
   2   1   2 2690.67   81.56
   2   1   2 2751.81   76.30
  -2   1  -2 2689.58   81.26
   2  -1   2 2753.40   81.05
  -2  -1  -2 2684.19   75.60
  -2  -1  -2 2758.45   76.52
   2   1   3 1565.22   38.72
   2   1   3 1549.10   37.34
  -2   1  -3 1558.81   41.97
   2  -1   3 1648.89   47.18
  -2  -1  -3 1704.58   44.11
  -2  -1  -3 1561.08   43.11
   2   1   4  114.03    4.92
   2   1   4  115.51    7.32
  -2   1  -4  111.60    8.90
   2  -1   4  117.84    5.65
  -2  -1  -4  112.43    4.34
  -2  -1  -4  117.83    8.73
   2   1   5 1135.45   28.76
  -2   1  -5 1062.09   27.82
  -2  -1  -5 1095.76   23.19
   2  -1   5 1057.34   29.08
  -2  -1  -5 1111.26   26.73
   2   1   6   42.06    5.17
  -2   1  -6   32.55    7.24
  -2  -1  -6   31.85    3.66
   2  -1   6   37.46    3.79
  -2  -1  -6   32.67    6.74
   2   1   7 4275.33  147.79
  -2   1  -7 4206.19  160.72
  -2  -1  -7 4045.35  129.85
   2  -1   7 4080.22  139.97
  -2  -1  -7 4423.68  153.90
   2   1   8    1.82    4.04
  -2   1  -8    8.73    4.25
  -2  -1  -8    4.65    2.69
   2  -1   8    3.31    4.54
  -2  -1  -8    8.08    3.82
   2   1   9 1063.96   26.53
  -2   1  -9 1055.45   29.79
  -2  -1  -9 1069.23   22.17
   2  -1   9 1067.35   28.54
  -2  -1  -9 1094.95   28.65
   2   1  10   97.98    3.82
  -2   1 -10   90.29    9.16
   2  -1  10   92.03    4.62
  -2  -1 -10   91.46    4.13
  -2  -1 -10   91.41    3.67
   2   1  11   61.31    4.76
  -2   1 -11   73.95    6.19
  -2  -1 -11   61.53    5.66
   2  -1  11   62.56    5.94
   2   1  12   41.42    4.62
  -2   1 -12   42.33    5.96
  -2  -1 -12   40.46    3.53
   2  -1  12   45.40    3.99
   2   1  13    0.91    2.35
  -2   1 -13   -8.27    5.24
  -2  -1 -13    1.58    3.14
   2  -1  13    3.39    4.88
   2   1  14   15.42    3.90
  -2   1 -14   13.62    6.12
  -2  -1 -14   17.91    5.74
   2  -1  14    9.68    3.90
   2   1  15  156.61    5.10
  -2   1 -15  154.09    9.92
  -2  -1 -15  142.15    6.52
   2  -1  15  148.07    9.81
  -2   1 -16   12.74    7.02
  -2  -1 -16   16.28    6.80
   2  -1  16   26.80    4.72
  -2   1 -17   74.53    9.30
  -2  -1 -17   76.71    9.15
   2  -1  17   69.81    6.03
  -2   1 -18  676.93   26.63
  -2  -1 -18  623.27   19.71
   2  -1  18  678.02   25.03
  -2   1 -19  159.35   13.15
  -2  -1 -19  157.18    8.83
   2  -1  19  164.61    9.05
  -2   1 -20  173.10   14.46
  -2  -1 -20  173.59   14.33
   2  -1  20  179.48    9.54
  -2   1 -21  564.46   27.05
  -2  -1 -21  566.74   21.11
  -2   1 -22  107.02   13.38
  -2  -1 -22  104.91    9.28
  -2  -1 -22   93.36   12.88
  -2   1 -23    8.61   10.10
  -2  -1 -23    3.10    6.94
   2  -1  23    1.42    2.26
  -2  -1 -23   10.47    9.56
  -2   1 -24    0.47   10.49
  -2  -1 -24    3.29   12.07
  -2  -1 -24    2.16    9.98
  -2   1 -25   21.55   11.95
  -2  -1 -25   14.22    8.73
  -2  -1 -25   15.28   11.23
  -2   1 -26   10.55   19.23
  -2  -1 -26   15.93    9.39
  -2  -1 -26   21.44   11.88
  -2   1 -27   26.32   20.90
  -2  -1 -27   27.84   15.23
  -2  -1 -27   22.53   19.81
  -2   1 -28   12.87   22.70
  -2  -1 -28   10.17   18.20
  -2  -1 -28    5.21   20.55
   2   2 -28   37.50   26.80
   2  -2 -28   42.00   15.21
   2  -2 -28   36.14   28.46
   2   2 -27   35.21   24.56
   2  -2 -27   34.97    9.70
   2  -2 -27   28.60   17.62
   2   2 -26    4.54   13.66
   2  -2 -26   24.24    8.30
   2  -2 -26   -3.01   15.37
   2   2 -25   28.35   13.57
   2  -2 -25   26.11   12.97
   2  -2 -25   14.86   15.56
   2   2 -24    2.88   12.05
   2  -2 -24    1.15    6.88
   2  -2 -24   -0.99   13.17
  -2  -2  24   -0.17    6.84
   2   2 -23   79.20   15.54
   2  -2 -23   77.90    8.67
   2  -2 -23   86.75   17.31
  -2  -2  23   88.86    8.85
   2   2 -22   -1.59   10.93
   2  -2 -22   12.31    9.11
   2  -2 -22  -12.73   12.01
  -2  -2  22    0.27    4.65
  -2  -2  22   -4.13    9.56
   2   2 -21   30.65   12.96
   2  -2 -21   41.65    7.17
   2  -2 -21   55.31   13.47
  -2  -2  21   41.78    7.01
  -2  -2  21   54.04    7.16
   2   2 -20   46.72   12.11
   2  -2 -20   44.93    6.73
   2  -2 -20   45.66   12.94
  -2  -2  20   49.18    7.77
  -2  -2  20   47.99    6.67
   2   2 -19   20.39    9.79
   2  -2 -19    4.35    8.50
   2  -2 -19    3.28   10.66
  -2  -2  19   -0.69    4.54
  -2  -2  19    3.20    8.32
   2   2 -18    4.67    9.14
   2  -2 -18    2.37    5.80
   2  -2 -18   -9.32   10.11
  -2  -2  18   12.69    7.21
  -2  -2  18    5.17    5.35
   2   2 -17 1194.54   47.07
   2  -2 -17 1126.98   51.18
  -2  -2  17 1204.37   38.11
  -2  -2  17 1194.96   35.51
   2   2 -16  373.76   19.11
   2  -2 -16  338.86   21.62
  -2  -2  16  401.33   18.23
  -2  -2  16  410.27   18.10
   2   2 -15   44.46    8.83
   2  -2 -15   41.50    3.27
   2  -2 -15   55.22   16.14
  -2  -2  15   37.81    5.74
  -2  -2  15   43.35    5.50
   2   2 -14  149.95   16.53
   2  -2 -14  161.22    6.31
   2  -2 -14  155.71   22.42
  -2  -2  14  167.29   10.39
   2   2 -13  174.00   17.38
   2  -2 -13  186.05   14.21
  -2  -2  13  190.77    7.82
   2   2 -12    9.63    6.41
   2  -2 -12    3.18    8.13
  -2  -2  12   10.95    6.28
   2   2 -11   14.47    6.33
   2  -2 -11   -4.35   12.03
   2   2 -10  112.13   12.56
   2  -2 -10  130.18   10.88
  -2  -2  10  139.29    9.95
   2   2  -9  661.36   21.72
  -2   2   9  641.32   20.46
  -2  -2   9  655.52   17.81
   2  -2  -9  665.20   25.49
   2   2  -8 1900.99   63.10
  -2   2   8 1973.90   63.06
  -2  -2   8 2056.47   60.46
   2  -2  -8 2080.47   72.44
   2   2  -7    5.77    5.69
  -2   2   7    8.24    9.31
  -2  -2   7   10.35    4.45
   2  -2  -7    7.95   10.50
   2   2  -6 1438.84   51.75
  -2   2   6 1485.81   53.94
  -2  -2   6 1516.37   42.73
   2  -2  -6 1438.07   47.66
   2   2  -5  179.23   12.80
  -2   2   5  189.23   14.93
  -2  -2   5  183.09    7.93
   2  -2  -5  164.78   10.49
   2   2  -4   80.13   10.28
  -2   2   4   83.10    8.03
  -2  -2   4   89.06    6.32
   2  -2  -4   82.54    7.82
   2   2  -3  128.07   11.89
  -2   2   3  125.46    9.43
  -2  -2   3  145.85    7.20
   2  -2  -3  130.10    9.27
   2   2  -2 3032.45  108.32
  -2   2   2 3086.88  111.70
  -2  -2   2 3194.91  116.96
   2  -2  -2 3145.90  122.78
   2   2  -1  173.77   12.29
  -2   2   1  158.18    9.70
   2  -2  -1  167.94    9.91
  -2  -2   1  176.63    8.33
   2   2   0   -3.78    4.97
  -2   2   0    9.77    5.64
  -2  -2   0    2.49    7.58
  -2  -2   0    8.10    5.02
  -2   2  -1  796.80   32.37
   2   2   1  781.82   23.42
  -2  -2  -1  821.65   23.94
  -2  -2  -1  804.81   23.36
   2  -2   1  794.26   30.56
   2   2   2   80.67    9.83
  -2   2  -2   87.75    8.08
   2  -2   2   90.00    7.65
  -2  -2  -2   73.34    9.55
  -2  -2  -2   82.27    7.03
   2   2   3 2258.51   73.16
  -2   2  -3 2272.87   78.31
   2  -2   3 2284.85   75.45
  -2  -2  -3 2259.24   71.81
  -2  -2  -3 2318.06   82.41
   2   2   4 1398.81   47.32
  -2   2  -4 1441.62   46.70
   2  -2   4 1471.08   50.15
  -2  -2  -4 1488.47   48.06
  -2  -2  -4 1454.24   50.01
   2   2   5 1194.32   35.03
  -2   2  -5 1221.98   39.26
   2  -2   5 1235.02   37.00
  -2  -2  -5 1176.56   33.68
  -2  -2  -5 1204.93   37.25
   2   2   6   -0.60    4.58
  -2   2  -6    1.96    5.62
   2  -2   6    5.82    4.90
  -2  -2  -6    8.36    5.92
  -2  -2  -6    3.99    5.12
   2   2   7  670.48   19.44
  -2   2  -7  636.16   22.20
   2  -2   7  672.29   20.41
  -2  -2  -7  646.13   17.85
  -2  -2  -7  677.64   27.00
   2   2   8 2909.57   97.06
  -2   2  -8 2888.06  107.42
   2  -2   8 2812.60  103.07
  -2  -2  -8 2778.08   92.44
  -2  -2  -8 2933.57  106.06
  -2   2  -9  421.27   16.73
  -2  -2  -9  420.69   14.48
   2  -2   9  455.09   19.23
  -2  -2  -9  408.20   16.81
  -2   2 -10 1104.30   37.66
  -2  -2 -10 1071.83   28.06
   2  -2  10 1121.48   33.16
  -2  -2 -10 1169.05   47.10
  -2   2 -11  132.53   10.23
  -2  -2 -11  144.47    5.19
   2  -2  11  145.87    7.71
  -2  -2 -11  142.16   10.35
  -2   2 -12    0.70    7.05
  -2  -2 -12    5.14    2.37
   2  -2  12    7.16    6.63
  -2  -2 -12    9.70    7.17
  -2   2 -13  111.36   10.50
  -2  -2 -13   99.38    5.36
   2  -2  13  113.36    6.88
  -2  -2 -13  105.85   16.06
  -2   2 -14  428.98   25.59
  -2  -2 -14  428.42   10.89
   2  -2  14  446.44   14.02
  -2  -2 -14  420.18   27.29
  -2   2 -15   80.73   10.59
  -2  -2 -15   71.58    4.35
   2  -2  15   87.47    6.51
  -2  -2 -15   62.45   10.85
  -2   2 -16  974.00   39.20
   2  -2  16  984.54   28.95
  -2  -2 -16  994.04   28.69
  -2  -2 -16  916.83   21.16
  -2  -2 -16  992.92   41.09
  -2   2 -17   88.67   11.78
  -2  -2 -17   70.42   10.30
   2  -2  17   86.50    7.28
  -2  -2 -17   80.18   12.06
  -2   2 -18   84.86   12.50
  -2  -2 -18   79.07    6.71
   2  -2  18   74.08   10.35
  -2  -2 -18   87.04   12.40
  -2   2 -19  111.51   14.08
  -2  -2 -19  101.10    7.59
   2  -2  19  129.20    8.26
  -2  -2 -19  101.98   13.65
  -2   2 -20   75.30   12.74
  -2  -2 -20   58.83   10.35
   2  -2  20   59.38   11.15
  -2  -2 -20   76.14   12.42
  -2   2 -21   14.07   11.09
  -2  -2 -21    3.55    5.59
   2  -2  21   -2.10    5.86
  -2  -2 -21   -6.43   10.59
  -2   2 -22    4.72   12.19
  -2  -2 -22   -1.44    9.36
   2  -2  22    5.21    6.26
  -2  -2 -22   21.57   11.21
  -2   2 -23   96.70   16.39
  -2  -2 -23   98.94    9.56
   2  -2  23  111.20   13.59
  -2  -2 -23   86.43   15.88
  -2   2 -24    8.48   12.75
  -2  -2 -24   -3.96    7.01
   2  -2  24   -8.01    6.80
  -2  -2 -24   21.93   11.31
  -2   2 -25   12.90   13.43
  -2  -2 -25   21.26   11.49
   2  -2  25    2.92    7.12
  -2  -2 -25   -4.43   12.99
  -2   2 -26    4.18   14.45
  -2  -2 -26    0.86   13.33
  -2  -2 -26  -17.44   13.58
  -2   2 -27   55.90   19.36
  -2  -2 -27   75.41   11.60
  -2  -2 -27   66.89   17.68
  -2   2 -28   16.27   17.95
  -2  -2 -28   23.43   10.44
  -2  -2 -28   42.95   16.41
   2   3 -27   19.03   19.54
   2  -3 -27   35.51    9.98
   2  -3 -27   39.51   21.46
  -2  -3  27   37.63    9.80
   2   3 -26   32.49   17.95
   2  -3 -26   13.81   14.10
   2  -3 -26   28.32   19.82
  -2  -3  26   31.19   13.87
   2   3 -25  101.07   20.07
   2  -3 -25   55.53    9.67
   2  -3 -25   50.94   20.85
  -2  -3  25   72.02    9.70
   2   3 -24  -25.06   15.29
   2  -3 -24    6.17    6.93
   2  -3 -24    0.92   15.78
  -2  -3  24   -3.48    5.88
  -2  -3  24   -2.42    7.45
   2   3 -23   19.71   15.04
   2  -3 -23    4.61   11.12
   2  -3 -23   14.13   15.63
  -2  -3  23   14.69   11.54
  -2  -3  23   18.58   11.49
   2   3 -22   32.79   14.44
   2  -3 -22    4.15    7.21
   2  -3 -22   13.60   15.44
  -2  -3  22   25.83    7.92
  -2  -3  22   17.83    7.35
   2   3 -21   19.42   12.62
   2  -3 -21   -0.98    6.32
   2  -3 -21   -3.91   13.95
  -2  -3  21   -1.85   12.10
  -2  -3  21    3.72    6.30
   2   3 -20   -2.86   11.88
   2  -3 -20    1.07    1.72
   2  -3 -20   -1.27   12.97
  -2  -3  20    8.96    7.58
  -2  -3  20   -4.81    9.62
   2   3 -19   13.27   11.71
   2  -3 -19    6.67    3.19
   2  -3 -19    6.71   13.15
  -2  -3  19   17.73   12.18
  -2  -3  19   13.60    6.42
   2   3 -18    8.76   11.62
   2  -3 -18    6.81    4.82
   2  -3 -18  -23.83   19.28
  -2  -3  18   20.90    7.85
  -2  -3  18    5.77    5.95
   2   3 -17    8.56   16.55
   2  -3 -17   -0.26    5.15
   2  -3 -17   24.58   19.49
  -2  -3  17   13.15    7.27
  -2  -3  17    2.88    6.23
   2   3 -16  892.05   53.58
   2  -3 -16  948.68   30.28
   2  -3 -16  971.04   49.05
  -2  -3  16  932.14   31.52
   2   3 -15 2653.34  122.77
   2  -3 -15 2816.82  103.99
   2  -3 -15 2607.44  129.86
  -2  -3  15 2790.14  103.86
   2   3 -14   28.43   10.90
   2  -3 -14   37.67   13.02
  -2  -3  14   34.24    6.88
   2   3 -13  111.85   12.80
   2  -3 -13  104.13   22.93
  -2  -3  13  123.99    9.12
   2   3 -12  276.37   23.55
   2  -3 -12  294.64   21.10
  -2  -3  12  309.34   13.04
   2   3 -11   12.92    8.18
  -2   3  11   -0.15    7.40
  -2  -3  11    1.31    5.78
   2  -3 -11   -0.05    9.75
   2   3 -10    1.06    7.67
  -2   3  10   12.07    7.62
  -2  -3  10    7.78    8.39
   2  -3 -10   10.86   15.35
   2   3  -9  359.02   17.80
  -2   3   9  367.09   25.07
  -2  -3   9  391.13   15.05
   2  -3  -9  357.21   20.49
   2   3  -8  654.35   27.17
  -2   3   8  649.71   33.29
  -2  -3   8  730.59   24.52
   2  -3  -8  657.66   38.28
   2   3  -7    2.43    7.25
  -2   3   7   -3.47    7.42
  -2  -3   7    6.36    9.10
   2  -3  -7    5.60    7.85
   2   3  -6  456.27   26.40
  -2   3   6  449.11   19.95
  -2  -3   6  470.38   22.22
   2  -3  -6  453.05   20.89
   2   3  -5   33.90    7.71
  -2   3   5   29.47    8.59
  -2  -3   5   25.85    6.76
   2  -3  -5    7.86   13.52
   2   3  -4   89.84    9.32
  -2   3   4   79.82   10.25
  -2  -3   4  103.85    8.34
   2  -3  -4   75.22   10.35
   2   3  -3  152.21   11.04
  -2   3   3  180.73   12.12
  -2  -3   3  165.56   10.33
   2  -3  -3  164.06   12.79
   2   3  -2  172.63   11.57
  -2   3   2  183.73   12.32
  -2  -3   2  188.32   11.30
   2  -3  -2  175.49   12.87
   2   3  -1 2131.50   80.34
  -2   3   1 2256.87   95.67
   2  -3  -1 2309.69   86.92
  -2  -3   1 2202.08   80.03
   2   3   0  281.59   13.88
   2  -3   0  300.48   15.28
  -2  -3   0  296.54   13.85
   2   3   1   43.51    8.01
   2  -3   1   58.27    8.86
  -2  -3  -1   63.98    7.70
   2   3   2  279.23   14.13
  -2   3  -2  303.91   22.99
   2  -3   2  296.00   15.44
  -2  -3  -2  317.66   14.39
   2   3   3   31.93    7.77
  -2   3  -3   39.99    9.50
   2  -3   3   37.33    7.96
  -2  -3  -3   36.95    6.58
  -2  -3  -3   36.70    7.93
   2   3   4  291.72   19.28
  -2   3  -4  264.63   15.20
   2  -3   4  277.27   13.91
  -2  -3  -4  247.06   11.81
  -2  -3  -4  259.53   13.71
   2   3   5  674.63   32.79
  -2   3  -5  689.62   27.51
   2  -3   5  664.42   33.00
  -2  -3  -5  679.80   28.26
  -2  -3  -5  721.65   26.17
   2   3   6  106.07   14.25
  -2   3  -6   80.26   16.47
   2  -3   6   94.10   14.65
  -2  -3  -6  110.18    7.75
  -2  -3  -6  110.60    9.54
   2   3   7  309.85   14.77
  -2   3  -7  306.65   16.57
   2  -3   7  352.55   15.71
  -2  -3  -7  322.56   17.24
  -2  -3  -7  289.94   21.24
   2   3   8   86.18    8.66
  -2   3  -8   80.50   10.58
   2  -3   8   75.86    8.59
  -2  -3  -8   85.78    6.89
  -2  -3  -8   76.90    9.58
   2   3   9   12.45    6.25
  -2   3  -9    5.73   13.46
   2  -3   9    0.05    6.57
  -2  -3  -9    9.54    7.59
  -2  -3  -9   -2.56    7.82
   2   3  10   42.99    7.48
  -2   3 -10   55.31   10.16
   2  -3  10   59.07   11.67
  -2  -3 -10   58.40    5.97
  -2  -3 -10   68.02   15.35
  -2   3 -11  105.04   12.78
  -2  -3 -11  114.50   10.03
   2  -3  11  124.11    9.92
  -2  -3 -11  136.78   12.43
  -2   3 -12   14.54   14.84
  -2  -3 -12   34.63    5.09
   2  -3  12   35.34    7.20
  -2  -3 -12   19.25   10.30
  -2   3 -13   -9.74    9.62
  -2  -3 -13    0.90    3.94
   2  -3  13   -8.93   10.47
  -2  -3 -13    9.36   14.04
  -2   3 -14   14.59   10.53
  -2  -3 -14   13.41    5.90
   2  -3  14   14.37    6.96
  -2  -3 -14   16.77   10.35
  -2   3 -15   36.97   19.51
  -2  -3 -15   64.38    7.33
   2  -3  15   63.31   11.34
  -2  -3 -15   51.33   12.79
  -2   3 -16  449.37   37.49
  -2  -3 -16  493.86   13.95
   2  -3  16  512.29   19.72
  -2  -3 -16  500.56   40.35
  -2   3 -17    8.61   10.64
  -2  -3 -17    3.65    2.98
   2  -3  17   10.46    9.35
  -2  -3 -17  -13.43   16.17
  -2   3 -18   19.70   12.36
  -2  -3 -18   16.17    2.97
   2  -3  18   11.04    6.90
  -2  -3 -18   32.51   11.60
  -2   3 -19   -8.00   12.31
   2  -3  19    7.19   10.21
  -2  -3 -19    4.35    5.46
  -2  -3 -19   -1.30    2.34
  -2  -3 -19   -4.51   11.42
  -2   3 -20   13.87   12.81
   2  -3  20    4.19    6.38
  -2  -3 -20    3.75    5.98
  -2  -3 -20    2.33    2.13
  -2  -3 -20  -13.83   12.11
  -2   3 -21   12.54   13.75
  -2  -3 -21    7.13    9.86
   2  -3  21   13.20    7.10
  -2  -3 -21   23.22   13.16
  -2   3 -22   -5.42   14.01
  -2  -3 -22    1.88    6.31
   2  -3  22   -7.72    6.80
  -2  -3 -22    8.80   12.78
  -2   3 -23   71.37   19.62
  -2  -3 -23   75.59    8.78
   2  -3  23   78.88    9.63
  -2  -3 -23   93.02   17.70
  -2   3 -24   -1.39   15.06
  -2  -3 -24    5.90    7.25
   2  -3  24   21.25   11.91
  -2  -3 -24   -0.80   14.84
  -2   3 -25  -10.05   16.79
  -2  -3 -25    5.20    7.37
   2  -3  25    7.62    7.70
  -2  -3 -25  -15.27   15.49
  -2   3 -26   13.87   18.03
  -2  -3 -26    7.22   12.41
   2  -3  26    6.59    8.47
  -2  -3 -26   12.19   16.61
   2   4 -25   26.47   28.80
   2  -4 -25    5.88    8.56
   2  -4 -25    9.56   19.81
  -2  -4  25    4.74    8.91
   2   4 -24    0.63   20.33
   2  -4 -24   28.22    9.25
   2  -4 -24   10.55   21.34
  -2  -4  24   31.32   12.95
  -2  -4  24   40.98    9.15
   2   4 -23   35.87   21.16
   2  -4 -23   86.09   21.82
  -2  -4  23   78.44   22.96
  -2  -4  23   63.95   15.06
   2   4 -22    7.66   18.13
   2  -4 -22   -7.58   18.03
  -2  -4  22   14.49   12.36
  -2  -4  22   24.09    8.44
   2   4 -21  133.51   23.43
   2  -4 -21  125.44   23.39
  -2  -4  21  152.79   25.48
  -2  -4  21  143.48   11.95
   2   4 -20   47.04   17.88
   2  -4 -20   36.64    8.55
   2  -4 -20   56.38   19.05
  -2  -4  20   72.92   20.53
  -2  -4  20   61.30   14.65
   2   4 -19   81.07   18.31
   2  -4 -19   69.62   10.82
   2  -4 -19   85.37   19.59
  -2  -4  19   87.99   14.54
  -2  -4  19   78.68   10.12
   2   4 -18    9.23   13.10
   2  -4 -18   -0.53    8.36
   2  -4 -18    7.07   22.02
  -2  -4  18   -4.82   10.27
  -2  -4  18    1.84   10.75
   2   4 -17   59.83   23.92
   2  -4 -17   54.44   11.36
   2  -4 -17   46.43   28.08
  -2  -4  17   58.45    9.10
   2   4 -16   30.48   20.18
   2  -4 -16   11.48    9.72
   2  -4 -16   -2.57   14.09
  -2  -4  16   -1.50   11.32
   2   4 -15   32.95   14.88
   2  -4 -15   51.44    8.03
   2  -4 -15   40.25   15.91
  -2  -4  15   39.84    9.14
   2   4 -14  118.26   16.95
   2  -4 -14  123.51   18.39
  -2  -4  14  120.44   16.94
   2   4 -13   11.62   17.74
  -2   4  13    4.62    9.54
  -2  -4  13    8.12    8.11
   2  -4 -13    5.52   21.22
   2   4 -12  568.63   43.25
  -2   4  12  567.91   28.87
  -2  -4  12  573.44   31.98
   2  -4 -12  591.54   35.54
   2   4 -11    4.47   11.11
  -2   4  11   -0.80   10.17
  -2  -4  11    3.15    7.49
   2  -4 -11   -2.46   12.10
   2   4 -10   61.78   19.25
  -2   4  10   59.91   12.51
  -2  -4  10   59.41   14.91
   2  -4 -10   48.93   20.81
   2   4  -9   15.68   10.58
  -2   4   9   -9.84   17.64
  -2  -4   9   20.84    8.53
   2  -4  -9   34.13   11.42
   2   4  -8   20.96   15.62
  -2   4   8   21.28   11.33
  -2  -4   8   34.62    8.58
   2  -4  -8   43.01   18.19
   2   4  -7   69.45   12.02
  -2   4   7   73.58   12.47
  -2  -4   7   64.46   14.52
   2  -4  -7   69.08   13.17
   2   4  -6  259.79   25.45
  -2   4   6  245.79   27.81
  -2  -4   6  271.28   15.63
   2  -4  -6  286.75   28.27
   2   4  -5    1.71    9.20
   2  -4  -5   16.73   11.31
  -2  -4   5    3.59    7.90
   2   4  -4  112.30   14.23
  -2   4   4   92.93   13.67
  -2  -4   4  161.03   18.24
   2  -4  -4  108.36   13.77
   2   4  -3  324.05   26.83
  -2   4   3  266.86   18.27
   2  -4  -3  352.45   29.86
  -2  -4   3  243.75   24.92
   2   4  -2  138.64   13.09
  -2  -4   2  122.85   12.09
   2   4  -1    6.59    8.93
   2  -4  -1   35.12   10.11
  -2  -4   1   19.92    8.72
   2   4   0  230.83   15.67
  -2   4   0  235.29   17.14
   2  -4   0  263.18   24.32
  -2  -4   0  265.62   22.66
   2   4   1  195.38   21.80
   2  -4   1  209.15   24.14
  -2  -4  -1  208.88   20.94
   2   4   2   35.89   15.14
  -2   4  -2   44.75   16.62
   2  -4   2   41.66   10.61
  -2  -4  -2   32.26    9.92
   2   4   3    2.00    8.65
  -2   4  -3   -0.42   10.15
   2  -4   3   15.08    9.02
  -2  -4  -3    2.67    8.87
  -2   4  -4  211.06   19.24
   2  -4   4  205.82   23.49
  -2   4  -5  867.03   55.02
   2   4   5  883.26   37.40
  -2  -4  -5  915.70   34.28
  -2  -4  -5  881.12   40.26
   2  -4   5  911.01   39.29
  -2   4  -6   90.06   15.00
  -2  -4  -6  123.60   15.51
   2  -4   6  115.39   12.48
  -2  -4  -6  105.93   13.45
   2   4   7  526.16   36.25
  -2   4  -7  517.85   41.62
   2  -4   7  541.67   26.09
  -2  -4  -7  568.37   22.54
  -2  -4  -7  504.75   36.39
   2   4   8  176.64   15.09
  -2   4  -8  174.78   18.02
   2  -4   8  209.55   22.93
  -2  -4  -8  202.15   12.39
  -2  -4  -8  189.68   16.14
   2   4   9   -5.40    8.58
  -2   4  -9   16.03   16.33
   2  -4   9   -4.04    8.64
  -2  -4  -9    8.66    9.86
  -2  -4  -9    7.79   14.40
   2   4  10  246.64   22.74
  -2   4 -10  255.97   20.05
   2  -4  10  271.99   23.35
  -2  -4 -10  271.43   14.14
  -2  -4 -10  263.83   19.29
   2   4  11   12.06    9.23
  -2   4 -11    9.95   11.83
   2  -4  11   24.30    9.58
  -2  -4 -11   20.50   10.99
  -2  -4 -11   10.92   16.59
   2   4  12    2.17    7.72
  -2   4 -12    9.29   17.31
   2  -4  12   -1.52    8.48
  -2  -4 -12    2.13    6.23
  -2  -4 -12  -21.72   10.67
  -2   4 -13  343.49   25.32
  -2  -4 -13  380.75   21.63
   2  -4  13  376.30   28.23
  -2  -4 -13  323.54   24.21
  -2   4 -14  245.33   24.14
  -2  -4 -14  270.47   13.42
   2  -4  14  281.06   17.17
  -2  -4 -14  280.89   31.20
  -2   4 -15   57.37   24.16
  -2  -4 -15   51.39    9.99
   2  -4  15   27.48   15.72
  -2  -4 -15   45.42   14.01
  -2   4 -16   21.81   13.95
  -2  -4 -16   19.60    6.06
   2  -4  16   19.43    8.95
  -2  -4 -16   24.42   13.41
  -2   4 -17   15.88   16.10
  -2  -4 -17   32.15    5.95
   2  -4  17   23.33   15.55
  -2  -4 -17   21.49   23.04
  -2   4 -18  108.36   20.38
  -2  -4 -18  120.86   10.81
   2  -4  18  133.14   12.13
  -2  -4 -18  126.68   28.70
  -2   4 -19   -1.72   16.02
  -2  -4 -19   14.77    7.20
   2  -4  19    3.62   12.94
  -2  -4 -19   -2.72   14.16
  -2   4 -20  -11.76   23.93
  -2  -4 -20    3.05    5.97
   2  -4  20    1.19    7.70
  -2  -4 -20   11.11   13.99
  -2   4 -21   29.08   26.58
  -2  -4 -21   19.33    5.71
   2  -4  21   28.17    9.10
  -2  -4 -21   20.77   16.02
  -2   4 -22   86.34   30.56
  -2  -4 -22   51.81    9.08
   2  -4  22   63.14   10.02
  -2  -4 -22   61.24   18.97
  -2   4 -23   28.32   30.28
  -2  -4 -23   21.24    8.71
   2  -4  23   44.56    9.78
  -2  -4 -23   25.82   17.67
  -2   4 -24   24.71   28.24
  -2  -4 -24   -1.78   11.94
   2  -4  24   -2.52   13.05
  -2  -4 -24   14.80   16.83
   2   5 -22   10.74   30.30
   2  -5 -22   26.71   32.88
  -2  -5  22   24.45   16.38
  -2  -5  22    0.20   15.73
   2   5 -21    5.98   29.84
   2  -5 -21   -9.23   31.68
  -2  -5  21  -21.66   24.49
  -2  -5  21   13.95    9.50
   2   5 -20    8.66   19.17
   2  -5 -20    8.33   11.71
   2  -5 -20   18.28   19.79
  -2  -5  20   70.70   25.67
  -2  -5  20    2.10    9.27
   2   5 -19    6.77   17.69
   2  -5 -19   -0.07   11.41
   2  -5 -19   19.26   18.29
  -2  -5  19   16.91   14.60
  -2  -5  19   -0.73    9.54
   2   5 -18   23.29   17.30
   2  -5 -18   22.96    8.43
   2  -5 -18    9.51   18.54
  -2  -5  18    1.62   14.68
  -2  -5  18    4.30    9.26
   2   5 -17   15.21   16.90
   2  -5 -17   17.47    8.71
   2  -5 -17   14.70   17.67
  -2  -5  17    1.96   10.47
   2   5 -16   45.09   27.62
   2  -5 -16   67.20   15.67
   2  -5 -16   39.02   29.74
  -2  -5  16   39.56   11.45
  -2   5  15    5.27   11.59
   2   5 -15  -22.50   23.58
   2  -5 -15   16.53   16.60
  -2  -5  15    6.90   15.81
   2  -5 -15   11.63    9.44
   2   5 -14   10.94   14.69
  -2   5  14    4.72   11.18
  -2  -5  14    2.69    9.69
   2  -5 -14    4.50   15.67
   2   5 -13  -14.80   14.23
  -2   5  13   12.89   12.15
  -2  -5  13   13.93   16.34
   2  -5 -13   41.10   15.55
   2   5 -12   32.30   23.20
  -2   5  12   22.53   12.19
  -2  -5  12   20.87   10.45
   2  -5 -12   25.14   24.00
   2   5 -11   -3.28   13.58
  -2   5  11    3.91   11.96
  -2  -5  11   31.09   15.89
   2  -5 -11    4.17   14.04
   2   5 -10   42.59   14.73
  -2   5  10   31.94   19.77
  -2  -5  10   38.86   11.32
   2  -5 -10   60.71   23.36
   2   5  -9   45.53   25.02
  -2   5   9   75.09   15.18
  -2  -5   9   82.10   20.04
   2  -5  -9  101.06   18.01
   2   5  -8   -5.33   12.69
  -2   5   8  -23.13   19.00
  -2  -5   8    1.98    9.27
   2  -5  -8    7.58   13.62
   2   5  -7  219.11   29.67
  -2   5   7  180.58   19.98
  -2  -5   7  224.03   18.29
   2  -5  -7  202.96   31.38
   2   5  -6    6.28   12.27
  -2   5   6  -28.11   12.15
  -2  -5   6   19.21   15.64
   2   5  -5   -8.45   23.19
  -2   5   5   67.91   14.13
   2  -5  -5   72.58   25.22
  -2  -5   5   47.74   13.00
   2   5  -4  197.57   20.51
  -2   5   4  209.89   20.39
   2  -5  -4  236.69   23.10
  -2  -5   4  196.30   26.81
   2   5  -3   16.95   14.17
  -2  -5   3   45.53   12.67
   2   5  -2  144.24   17.93
  -2   5   2  149.13   18.86
   2  -5  -2  169.47   19.33
  -2  -5   2  185.65   18.06
   2   5  -1  277.59   24.14
  -2   5   1  372.05   26.78
   2  -5  -1  379.56   26.32
  -2  -5   1  410.66   35.14
   2   5   0  565.09   44.30
   2  -5   0  640.43   48.57
  -2   5  -1  202.54   20.67
   2   5   1  272.31   20.55
   2  -5   1  207.74   21.87
  -2   5  -2  256.98   34.72
  -2  -5  -2  314.90   22.69
   2  -5   2  287.03   34.49
  -2   5  -3   49.38   16.86
  -2  -5  -3  101.61   15.87
   2  -5   3   97.01   16.43
  -2   5  -4  133.64   32.84
   2   5   4  174.92   17.41
  -2  -5  -4  170.09   14.87
  -2  -5  -4  190.52   29.33
   2  -5   4  238.07   21.02
  -2   5  -5  198.12   24.43
   2   5   5  234.61   19.31
  -2  -5  -5  240.99   16.87
  -2  -5  -5  222.44   21.35
   2  -5   5  228.09   31.53
   2   5   6   47.91   19.15
   2  -5   6    9.21   12.44
  -2  -5  -6    5.58   15.45
  -2  -5  -6   50.72   20.39
  -2   5  -7   20.26   13.96
   2   5   7   17.02   11.81
  -2  -5  -7   24.43    9.97
  -2  -5  -7   30.90   12.94
   2  -5   7   -6.91   18.77
   2   5   8   58.02   13.48
  -2   5  -8   41.40   25.47
   2  -5   8   84.85   14.03
  -2  -5  -8   51.72   11.13
  -2  -5  -8   82.79   22.42
   2   5   9  159.78   24.24
  -2   5  -9  127.26   20.80
   2  -5   9  141.71   15.42
  -2  -5  -9  161.81   20.40
  -2  -5  -9  131.40   18.16
   2   5  10  -11.27   10.12
  -2   5 -10   -9.61   13.83
   2  -5  10   11.02   11.17
  -2  -5 -10   -3.47   12.99
  -2  -5 -10   -7.22   12.62
   2   5  11   60.70   16.77
  -2   5 -11   46.07   26.08
   2  -5  11   13.32   12.47
  -2  -5 -11   51.08   10.02
  -2  -5 -11   26.12   14.38
   2   5  12   10.69   10.25
  -2   5 -12   17.63   15.16
   2  -5  12    6.17   11.13
  -2  -5 -12   18.08   13.99
  -2  -5 -12    2.77   13.46
   2   5  13   -3.54    9.79
  -2   5 -13   14.76   15.21
   2  -5  13   14.42   10.27
  -2  -5 -13    3.34    8.44
  -2  -5 -13  -15.73   20.63
   2   5  14   15.82   10.44
  -2   5 -14   23.71   23.89
   2  -5  14    9.82   11.29
  -2  -5 -14   -1.77   13.69
  -2  -5 -14    8.18   14.02
  -2   5 -15  -19.94   16.38
  -2  -5 -15   -6.12    8.23
   2  -5  15   -1.66   10.47
  -2  -5 -15  -11.66   14.33
  -2   5 -16   38.92   18.79
  -2  -5 -16   51.41   14.37
   2  -5  16   33.75   12.40
  -2  -5 -16   39.76   16.72
  -2   5 -17   14.18   18.77
  -2  -5 -17   30.99    8.19
   2  -5  17   28.26   11.83
  -2  -5 -17   11.70   26.05
  -2   5 -18   45.32   30.44
  -2  -5 -18   55.36   13.64
   2  -5  18   46.26   12.54
  -2  -5 -18   34.03   18.75
  -2   5 -19    8.02   27.93
  -2  -5 -19   -6.50    7.01
   2  -5  19    8.60   14.46
  -2  -5 -19   -0.60   15.84
  -2   5 -20   40.24   20.36
  -2  -5 -20   20.46    6.73
   2  -5  20   21.48   11.02
  -2  -5 -20   16.30   18.84
  -2   5 -21   -8.73   20.90
  -2  -5 -21    8.18    8.31
   2  -5  21   16.94   15.37
  -2  -5 -21   30.19   18.66
  -2   5 -22   -4.51   21.85
   2  -5  22   12.37   10.32
  -2  -5 -22   26.95   19.08
   2   6 -18   -1.24   31.11
   2  -6 -18    1.50   10.85
   2  -6 -18   -2.56   20.93
  -2  -6  18   17.96   16.01
  -2  -6  18   10.86   12.07
   2   6 -17   13.55   19.77
   2  -6 -17   -3.05   18.19
   2  -6 -17   28.16   20.52
  -2  -6  17   -4.35   15.53
  -2  -6  17   12.05   12.36
   2   6 -16   25.61   20.46
  -2   6  16    6.69   13.89
   2  -6 -16   30.54   12.09
   2  -6 -16   20.28   21.03
  -2  -6  16    7.62   19.28
  -2  -6  16   12.15   15.18
   2   6 -15    3.76   18.52
  -2   6  15   -8.49   13.20
   2  -6 -15   16.19   19.21
   2  -6 -15    5.57   29.70
  -2  -6  15   19.11   11.93
  -2  -6  15   19.59   14.52
  -2   6  14   30.91   20.46
   2   6 -14  -20.26   27.93
   2  -6 -14  -20.12   29.11
  -2  -6  14    0.38   16.24
   2  -6 -14    8.78   11.40
   2   6 -13    0.11   17.45
  -2   6  13   -0.40   13.05
  -2  -6  13    0.60   11.85
   2  -6 -13   27.86   18.47
   2   6 -12   32.69   17.56
  -2   6  12   16.66   22.57
  -2  -6  12   -6.69   12.33
   2  -6 -12   39.50   18.49
   2   6 -11   19.74   30.35
  -2   6  11   43.63   15.90
  -2  -6  11   54.05   14.14
   2  -6 -11   69.20   30.86
   2   6 -10    3.61   16.22
  -2   6  10   10.23   22.10
  -2  -6  10   19.55   12.05
   2  -6 -10  -27.70   17.17
   2   6  -9   56.29   19.09
  -2   6   9   59.12   16.40
  -2  -6   9   35.07   14.62
   2  -6  -9   49.23   18.92
   2   6  -8   46.05   25.86
  -2   6   8   16.08   23.49
   2  -6  -8   13.80   26.11
  -2  -6   8   14.13   12.98
   2   6  -7   10.46   17.08
  -2   6   7   47.58   15.22
   2  -6  -7  -27.55   19.03
  -2  -6   7   32.60   14.07
   2   6  -6   83.71   31.61
  -2   6   6  111.53   31.03
   2  -6  -6   81.02   34.60
  -2  -6   6  112.57   17.32
   2   6  -5  105.00   20.66
  -2   6   5  156.37   21.46
   2  -6  -5  155.54   22.41
  -2  -6   5  116.62   18.27
   2   6  -4   15.91   16.04
  -2   6   4   23.06   24.73
   2  -6  -4   53.41   17.42
  -2  -6   4   -4.75   14.17
   2   6  -3   46.63   17.74
  -2   6   3   29.55   16.36
   2  -6  -3   79.68   18.51
  -2  -6   3   45.92   16.25
   2   6  -2  134.27   20.27
   2  -6  -2  104.84   21.97
  -2  -6   2  118.99   18.49
   2   6  -1  315.79   29.55
  -2   6   1  428.03   32.32
   2  -6  -1  455.78   47.87
  -2  -6   1  359.37   29.29
   2   6   0  262.40   25.93
  -2   6   0  365.00   42.56
   2  -6   0  307.96   29.16
  -2  -6   0  204.55   24.76
  -2   6  -1   92.89   20.33
   2   6   1  127.02   18.99
  -2  -6  -1  119.10   15.66
  -2  -6  -1  119.48   19.30
   2  -6   1  154.98   30.15
   2   6   2  101.09   28.28
  -2   6  -2   79.24   31.64
   2  -6   2  103.71   19.42
  -2  -6  -2  113.10   19.54
  -2   6  -3   11.91   16.38
   2   6   3   49.83   13.74
  -2  -6  -3   -4.08   11.95
  -2  -6  -3   32.36   15.03
   2  -6   3   -0.13   23.86
  -2   6  -4   59.64   27.37
   2   6   4   61.10   23.97
  -2  -6  -4   45.05   13.66
  -2  -6  -4   37.96   16.32
   2  -6   4   43.82   17.13
   2   6   5   30.58   13.21
  -2   6  -5   -7.81   16.84
   2  -6   5    3.18   22.27
  -2  -6  -5  -17.26   18.80
  -2   6  -6   34.18   26.76
   2   6   6   12.77   21.83
  -2  -6  -6   26.21   19.05
  -2  -6  -6   41.14   16.25
   2  -6   6   56.68   16.10
  -2   6  -7   15.26   15.91
   2   6   7   -1.06   13.35
  -2  -6  -7    6.72   11.24
  -2  -6  -7   24.19   23.14
   2  -6   7    3.95   21.41
  -2   6  -8    8.37   17.04
   2   6   8   18.27   13.04
  -2  -6  -8   10.09   11.05
  -2  -6  -8  -12.60   15.62
   2  -6   8   25.58   14.29
  -2   6  -9    0.46   30.28
   2   6   9   46.13   15.18
  -2  -6  -9   64.71   19.69
  -2  -6  -9   22.09   26.70
   2  -6   9   52.67   24.04
   2   6  10   -3.03   12.20
  -2   6 -10    4.18   17.14
   2  -6  10   -5.04   13.75
  -2  -6 -10    5.25   10.53
  -2  -6 -10   22.16   15.16
  -2   6 -11   12.54   16.95
   2   6  11    5.37   12.16
  -2  -6 -11    3.30   10.60
  -2  -6 -11    9.51   15.41
   2  -6  11  -28.26   19.69
  -2   6 -12   55.36   30.31
   2   6  12   37.58   13.56
  -2  -6 -12   30.27   18.46
  -2  -6 -12   41.67   26.65
   2  -6  12   26.22   14.91
   2   6  13   -3.21   12.54
  -2   6 -13   13.10   17.83
   2  -6  13  -10.18   19.37
  -2  -6 -13    8.72   10.73
  -2  -6 -13   21.45   16.11
   2   6  14   39.69   12.77
  -2   6 -14   -0.27   21.08
   2  -6  14   21.98   14.58
  -2  -6 -14   33.38   11.70
  -2  -6 -14   19.68   18.32
   2   6  15   -7.54   11.89
  -2   6 -15   -9.86   19.30
   2  -6  15    4.59   20.06
  -2  -6 -15    2.12   15.66
  -2  -6 -15   -7.28   17.56
  -2   6 -16   27.44   29.85
  -2  -6 -16   -0.29    9.93
   2  -6  16  -12.69   12.07
  -2  -6 -16   10.69   26.38
  -2   6 -17   15.72   21.35
  -2  -6 -17   15.05   16.67
   2  -6  17    8.54   20.69
  -2  -6 -17   19.48   18.24
  -2   6 -18   -5.83   22.42
  -2  -6 -18   17.48    9.80
   2  -6  18    9.82   12.85
  -2  -6 -18   10.47   19.92
   2   7 -12   35.83   30.87
  -2   7  12   20.23   25.00
   2  -7 -12   -6.23   14.68
  -2  -7  12    3.53   15.76
  -2  -7  12   14.90   20.55
   2  -7 -12  -25.68   32.76
  -2   7  11    7.08   16.52
   2   7 -11   23.71   20.62
  -2  -7  11    2.24   15.77
  -2  -7  11    7.09   14.64
   2  -7 -11    0.88   20.63
  -2   7  10    0.12   23.08
   2   7 -10  -16.04   19.15
  -2  -7  10   -0.04   15.05
  -2  -7  10   17.80   13.47
   2  -7 -10   -9.02   20.04
  -2   7   9   -4.84   17.12
   2   7  -9   46.71   30.42
  -2  -7   9    7.06   16.12
  -2  -7   9   26.08   23.25
   2  -7  -9   27.51   32.30
  -2   7   8   -7.66   24.43
   2   7  -8    4.82   18.13
  -2  -7   8   -8.87   15.31
  -2  -7   8   13.33   14.53
   2  -7  -8   20.61   19.26
  -2   7   7    6.71   16.92
   2   7  -7   -0.27   18.06
  -2  -7   7   -7.02   14.70
  -2  -7   7  -27.45   22.74
   2  -7  -7    4.40   19.11
  -2   7   6   22.21   18.14
   2   7  -6   30.47   29.82
  -2  -7   6   33.35   16.65
  -2  -7   6   33.96   16.79
   2  -7  -6   42.86   30.35
  -2   7   5    6.40   17.25
   2   7  -5   -2.83   17.65
  -2  -7   5    0.16   14.39
  -2  -7   5    6.98   22.33
   2  -7  -5  -22.87   18.36
  -2   7   4   39.54   19.58
   2   7  -4   38.49   19.75
  -2  -7   4   57.58   17.20
  -2  -7   4   27.30   18.05
   2  -7  -4   76.34   21.17
  -2   7   3   10.55   28.46
   2   7  -3   16.62   17.76
  -2  -7   3    7.03   15.39
  -2  -7   3   16.71   16.15
   2  -7  -3   52.21   30.07
  -2   7   2   -1.57   17.73
   2   7  -2   11.46   17.52
  -2  -7   2   15.82   15.19
  -2  -7   2   21.00   16.42
   2  -7  -2   32.59   18.86
   2   7  -1   62.08   28.17
   2  -7  -1  137.05   32.68
  -2  -7   1   12.98   15.74
  -2  -7   1    8.63   17.16
  -2   7   0  149.52   27.67
   2   7   0  139.04   25.34
  -2  -7   0  161.13   21.26
  -2  -7   0  167.83   37.03
   2  -7   0  142.05   26.84
  -2   7  -1  129.65   37.82
   2   7   1  109.59   34.47
  -2  -7  -1   85.66   19.20
  -2  -7  -1  129.50   23.95
   2  -7   1  152.57   25.73
  -2   7  -2   -3.15   17.99
   2   7   2  -11.70   16.94
  -2  -7  -2   10.16   22.01
  -2  -7  -2  -12.06   26.10
   2  -7   2  -12.20   17.87
  -2   7  -3    7.57   17.69
   2   7   3    2.06   24.77
  -2  -7  -3  -18.65   20.03
  -2  -7  -3   -6.08   16.90
   2  -7   3    3.10   17.33
  -2   7  -4  -13.07   29.95
   2   7   4   29.28   16.43
  -2  -7  -4    2.93   13.65
  -2  -7  -4   11.58   17.13
   2  -7   4   30.21   26.22
  -2   7  -5    7.23   23.23
   2   7   5   75.53   29.19
  -2  -7  -5   49.99   15.71
  -2  -7  -5   36.40   30.92
   2  -7   5   71.30   19.90
  -2   7  -6   46.18   23.77
   2   7   6   79.13   19.57
  -2  -7  -6   63.84   16.76
  -2  -7  -6   78.41   22.17
   2  -7   6   37.77   33.49
  -2   7  -7  -11.14   34.17
   2   7   7   31.81   26.98
  -2  -7  -7   20.07   14.68
  -2  -7  -7   65.61   29.84
   2  -7   7   26.89   20.18
  -2   7  -8   67.23   24.99
   2   7   8   70.78   19.92
  -2  -7  -8   66.83   26.94
  -2  -7  -8   92.14   23.38
   2  -7   8  100.28   33.05
  -2   7  -9  -19.76   21.55
   2   7   9    0.32   25.12
  -2  -7  -9   -2.73   13.41
  -2  -7  -9   -0.16   18.82
   2  -7   9  -22.21   16.51
  -2   7 -10   26.13   34.87
   2   7  10   20.69   16.69
  -2  -7 -10   29.19   14.35
  -2  -7 -10    0.56   31.24
   2  -7  10   37.56   17.65
  -2   7 -11   16.16   22.47
   2   7  11   20.73   16.18
  -2  -7 -11   24.89   13.86
  -2  -7 -11    5.86   20.07
   2  -7  11    3.36   17.06
  -2   7 -12   -7.41   21.92
   2   7  12   18.07   14.30
  -2  -7 -12   13.23   19.25
  -2  -7 -12  -16.26   19.58
   2  -7  12    6.03   15.42
   3   0 -29  110.38   25.16
   3   0 -28  -12.09   11.74
   3   0 -27   25.49   12.27
   3   0 -26   -3.74   10.79
   3   0 -25   15.11   16.57
   3   0 -24   22.94   13.56
   3   0 -23    6.03    7.95
   3   0 -22    4.32    7.75
   3   0 -21   85.59    9.69
   3   0 -20    1.36    9.44
   3   0 -20   -0.76    9.98
   3   0 -19   48.46    7.14
   3   0 -18    4.35    5.36
   3   0 -17    5.93    5.16
   3   0 -16  -13.57    7.99
   3   0 -15  236.24   11.87
   3   0 -14    0.78    3.70
   3   0 -13   16.32    3.85
   3   0 -12    4.20    3.28
   3   0 -11 8384.47  405.12
   3   0 -10    2.70    2.36
   3   0 -10    0.15    3.11
   3   0  -9 4283.87  133.79
   3   0  -9 4119.61  136.03
   3   0  -8   -1.39    1.39
   3   0  -8    4.05    2.29
   3   0  -7 1772.69   38.61
   3   0  -7 1559.33   38.06
   3   0  -6    0.42    2.21
   3   0  -6   -1.61    1.93
   3   0  -5  907.22   17.44
   3   0  -5  865.21   16.17
   3   0  -4   -1.18    2.73
   3   0  -4   -2.34    2.90
   3   0  -3   51.75    4.04
   3   0  -2    0.39    1.89
   3   0  -1 1696.70   38.85
   3   0  -1 1794.77   37.40
   3   0   0    4.18    2.09
   3   0   0   -0.12    1.46
  -3   0   0    4.95    1.31
   3   0   1 5753.78  199.07
   3   0   1 5451.75  174.04
  -3   0  -1 5812.38  189.93
   3   0   2    3.59    2.41
   3   0   2    0.31    1.38
  -3   0  -2   -0.15    1.85
   3   0   330594.14 2844.79
   3   0   330697.36 2767.84
  -3   0  -331571.54 2931.12
   3   0   4    4.29    2.46
   3   0   4    1.73    2.27
  -3   0  -4    2.92    2.79
   3   0   5  217.15    5.08
   3   0   5  237.89    5.68
  -3   0  -5  236.11    7.00
   3   0   6   -3.27    1.93
   3   0   6   -1.92    1.64
  -3   0  -6   -2.99    3.15
   3   0   7    3.97    1.87
   3   0   7   -0.70    1.89
  -3   0  -7    0.75    2.28
   3   0   8    1.49    1.69
   3   0   8    1.01    3.16
  -3   0  -8   -3.38    2.46
   3   0   9   48.68    3.56
   3   0   9   53.28    3.07
  -3   0  -9   50.88    3.55
   3   0  10   -0.18    1.73
   3   0  10    0.19    2.41
  -3   0 -10    1.92    2.90
   3   0  11   79.59    2.76
   3   0  11   74.49    3.79
  -3   0 -11   73.66    4.38
   3   0  12   -2.87    2.79
  -3   0 -12   -2.09    3.43
   3   0  13    0.22    1.74
  -3   0 -13   -1.55    3.65
   3   0  14   -3.66    2.71
  -3   0 -14   -2.53    4.00
   3   0  15  111.69    3.49
  -3   0 -15  110.17    9.42
   3   0  16    2.44    3.04
  -3   0 -16    0.95    7.16
   3   0  17   17.64    3.19
  -3   0 -17    7.27    9.57
   3   0  18    0.76    3.35
  -3   0 -18  -12.38    6.18
   3   0  19 3242.40  106.50
  -3   0 -19 3385.59  135.80
   3   0  20    0.83    3.30
  -3   0 -20   -2.51    7.04
   3   0  21  524.48   14.32
  -3   0 -21  635.23   24.59
   3   0  22    1.94    3.23
  -3   0 -22  -11.42   11.56
   3   0  23  335.00    9.08
  -3   0 -23  407.61   25.92
  -3   0 -24   -4.77   14.83
  -3   0 -25   18.14   10.41
  -3   0 -26  -16.73   11.07
  -3   0 -27   26.46   11.65
  -3   0 -28   12.36   18.55
   3   1 -29   60.67   18.53
   3  -1 -29   73.06   13.93
   3  -1 -29   62.88   18.83
   3   1 -28   63.95   17.48
   3  -1 -28   57.61   12.54
   3  -1 -28   46.94   17.34
   3   1 -27    8.76   20.74
   3  -1 -27   -4.97   14.25
   3  -1 -27   19.53   14.18
   3   1 -26   39.44   18.47
   3  -1 -26   12.02    9.23
   3  -1 -26   22.44   22.78
   3   1 -25  -10.53   10.92
   3  -1 -25   -0.41    7.96
   3  -1 -25  -19.36   20.62
   3   1 -24   57.12   12.49
   3  -1 -24   61.31   14.46
   3  -1 -24   61.68   21.68
   3   1 -23   14.54    9.92
   3  -1 -23    8.51    7.07
   3  -1 -23    8.85   11.15
   3   1 -22   81.47   11.73
   3  -1 -22   84.84    8.75
   3  -1 -22   82.32   13.63
   3   1 -21   13.99    8.53
   3  -1 -21   -6.73    5.99
   3  -1 -21   13.22    9.85
   3   1 -20   99.23   11.58
   3  -1 -20  108.58   11.42
   3  -1 -20  100.86   13.07
   3   1 -19  424.35   26.54
   3  -1 -19  389.49   14.86
   3  -1 -19  438.26   23.17
   3   1 -18   21.39   12.27
   3  -1 -18   26.96    5.74
   3  -1 -18   11.81    9.65
   3   1 -17 1219.70   48.36
   3  -1 -17 1247.09   42.68
   3  -1 -17 1345.57   50.04
  -3  -1  17 1342.43   38.64
   3   1 -16  143.65   12.91
   3  -1 -16  128.21    7.14
   3  -1 -16  140.21   11.52
  -3  -1  16  133.65    7.30
   3   1 -15  210.97   10.41
   3  -1 -15  226.98    8.52
   3  -1 -15  230.59   13.31
  -3  -1  15  215.29    6.04
  -3  -1  15  247.00   11.86
   3   1 -14  108.11    7.77
   3  -1 -14  128.78    9.16
   3  -1 -14  116.56   10.04
  -3  -1  14  117.59    4.97
  -3  -1  14  121.35    5.96
   3   1 -13   -2.26    4.44
   3  -1 -13    0.61    3.69
   3  -1 -13   -3.84    5.96
  -3  -1  13    0.90    1.93
  -3  -1  13    4.92    3.35
   3   1 -12   48.48    7.88
   3  -1 -12   42.09    1.30
   3  -1 -12   42.64    6.94
  -3  -1  12   38.47    3.68
  -3  -1  12   44.83    3.79
   3   1 -11 1244.18   39.07
   3  -1 -11 1292.54   45.91
  -3  -1  11 1292.98   33.26
  -3  -1  11 1325.84   31.84
   3   1 -10  102.01    9.39
   3  -1 -10  130.05    7.95
  -3  -1  10  109.25    4.17
  -3  -1  10  118.27    4.59
   3   1  -9 1164.50   30.42
   3  -1  -9 1166.76   33.48
  -3  -1   9 1075.64   24.97
  -3  -1   9 1209.23   29.98
   3   1  -8  547.53   14.18
   3  -1  -8  555.36   21.23
  -3  -1   8  550.46   14.70
  -3  -1   8  562.40   11.92
   3   1  -7   70.94    4.50
   3  -1  -7   77.98    6.54
  -3  -1   7   67.18    5.34
  -3  -1   7   82.57    5.23
   3   1  -6  517.25   12.84
   3  -1  -6  549.37   21.52
  -3  -1   6  518.34   14.37
  -3  -1   6  499.99   10.34
   3   1  -5  154.98    6.40
   3   1  -5  148.79    7.70
  -3   1   5  149.56    9.23
   3  -1  -5  159.54   12.17
  -3  -1   5  163.61    4.55
  -3  -1   5  149.38    5.33
   3   1  -4   63.42    4.92
   3   1  -4   67.69    5.98
  -3   1   4   69.93    5.30
   3  -1  -4   58.72    9.63
  -3  -1   4   68.33    3.33
  -3  -1   4   70.67    4.10
   3   1  -3  116.64    8.05
   3   1  -3  108.55    4.69
  -3   1   3  101.85    6.28
   3  -1  -3  106.63    6.87
  -3  -1   3  102.68    3.64
  -3  -1   3  114.48    5.08
   3   1  -2 1166.51   29.12
   3   1  -2 1202.24   27.13
  -3   1   2 1162.09   30.76
   3  -1  -2 1223.21   32.21
  -3  -1   2 1178.31   24.85
  -3  -1   2 1262.28   33.90
   3   1  -1 1041.40   29.44
   3   1  -1 1001.27   23.99
  -3   1   1  988.13   25.82
   3  -1  -1 1023.37   26.11
  -3  -1   1  982.36   21.78
  -3  -1   1  938.76   22.17
   3   1   0   55.84    4.61
   3   1   0   55.93    4.81
  -3   1   0   55.13    7.64
   3  -1   0   54.24    8.00
  -3  -1   0   55.18    4.55
  -3  -1   0   60.81    4.28
   3   1   1    8.32    4.07
  -3   1  -1   15.87    4.27
   3   1   1    5.76    4.18
  -3  -1  -1   12.20    5.89
  -3  -1  -1   13.11    3.81
   3  -1   1   16.35    4.07
   3   1   229214.31 2828.91
   3   1   230380.55 2856.90
  -3   1  -230130.69 2966.78
   3  -1   230448.79 2966.69
  -3  -1  -230204.51 2863.61
  -3  -1  -230880.04 2922.49
   3   1   3 2366.99   66.81
   3   1   3 2383.46   60.45
  -3   1  -3 2341.90   70.73
   3  -1   3 2415.05   69.66
  -3  -1  -3 2489.14   71.19
  -3  -1  -3 2415.27   64.15
   3   1   4  196.49    6.63
  -3   1  -4  178.05   10.52
  -3  -1  -4  190.87    5.44
   3  -1   4  195.54    6.67
  -3  -1  -4  199.36    6.11
   3   1   5 1904.00   49.64
  -3   1  -5 1752.26   50.36
  -3  -1  -5 1829.07   46.76
   3  -1   5 1967.94   56.65
  -3  -1  -5 1840.16   50.93
   3   1   6   73.94    4.10
  -3   1  -6   58.89    5.11
  -3  -1  -6   61.55    3.14
   3  -1   6   64.30    6.23
  -3  -1  -6   61.81    6.46
   3   1   7    3.02    2.90
  -3   1  -7   -2.55    6.24
  -3  -1  -7    2.61    2.03
   3  -1   7   -0.41    4.57
  -3  -1  -7   -0.79    3.48
   3   1   8    9.11    2.93
  -3   1  -8    8.47    4.39
  -3  -1  -8    8.60    3.06
   3  -1   8   14.07    5.32
  -3  -1  -8    8.34    3.77
   3   1   9   12.10    2.90
  -3   1  -9   11.58    6.82
   3  -1   9    8.46    3.29
  -3  -1  -9    9.97    2.50
  -3  -1  -9   11.20    3.19
  -3  -1  -9    5.12    4.09
   3   1  10 1118.34   29.57
  -3   1 -10 1146.49   33.82
   3  -1  10 1138.70   27.66
  -3  -1 -10 1133.23   28.05
  -3  -1 -10 1136.00   23.40
  -3  -1 -10 1209.42   32.16
   3   1  11 2480.91   75.64
  -3   1 -11 2470.42   82.27
  -3  -1 -11 2379.54   66.01
   3  -1  11 2386.52   71.72
   3   1  12   30.38    3.28
  -3   1 -12   21.36    8.68
  -3  -1 -12   28.71    4.89
   3  -1  12   29.96    3.72
   3   1  13  472.78   11.76
  -3   1 -13  442.14   20.77
  -3  -1 -13  473.39   11.97
   3  -1  13  490.01   15.00
   3   1  14   -3.90    4.41
  -3   1 -14   -7.34    5.73
  -3  -1 -14    0.94    3.31
   3  -1  14    0.63    3.61
   3   1  15   80.21    4.37
  -3   1 -15   69.06    8.20
  -3  -1 -15   80.83    7.57
   3  -1  15   79.96    8.26
   3   1  16    6.77    4.34
  -3   1 -16    1.91    6.87
  -3  -1 -16    5.39    4.23
   3  -1  16    3.58    4.32
   3   1  17  130.59    5.35
  -3   1 -17  123.85   10.85
  -3  -1 -17  127.85    7.31
   3  -1  17  134.60    7.24
   3   1  18  281.07   10.94
  -3   1 -18  265.51   15.63
  -3  -1 -18  268.84   14.63
   3  -1  18  304.29   15.31
  -3   1 -19    8.12    7.92
   3  -1  19    5.65    2.28
  -3  -1 -19   16.28    8.47
   3  -1  19   11.49    5.34
  -3   1 -20  605.28   26.74
   3  -1  20  551.71   15.09
  -3  -1 -20  612.06   21.18
   3  -1  20  648.98   20.19
  -3   1 -21   78.47   12.35
  -3  -1 -21   81.09    8.42
  -3  -1 -21   99.91   11.66
  -3   1 -22  201.56   15.75
  -3  -1 -22  181.97   16.26
  -3  -1 -22  214.70   15.88
  -3   1 -23   72.41   20.01
  -3  -1 -23   84.68   10.05
  -3  -1 -23   87.03   12.78
  -3   1 -24    1.09   16.17
  -3  -1 -24    3.67    7.81
   3  -1  24    7.06    2.98
  -3  -1 -24   -2.98   10.05
  -3   1 -25   11.65   19.25
  -3  -1 -25   11.64    8.39
  -3  -1 -25    8.68   10.73
  -3   1 -26   15.55   12.81
  -3  -1 -26   -0.50   13.34
  -3  -1 -26   -6.03   16.67
  -3   1 -27   13.86   13.81
  -3  -1 -27    9.08   11.04
  -3  -1 -27   11.51   17.94
  -3   1 -28   33.36   15.98
  -3  -1 -28   27.27   12.19
  -3  -1 -28   25.26   23.26
   3   2 -28   -8.60   23.95
   3  -2 -28  -16.59   14.24
   3  -2 -28   12.63   25.91
   3   2 -27    5.66   14.45
   3  -2 -27    5.32    8.44
   3  -2 -27   28.72   24.26
   3   2 -26   24.42   15.53
   3  -2 -26   47.85    9.20
   3  -2 -26   28.68   26.93
   3   2 -25   -5.03   12.67
   3  -2 -25   -8.60   11.00
   3  -2 -25   24.75   14.10
   3   2 -24   13.29   12.51
   3  -2 -24    4.38    7.06
   3  -2 -24    5.00   14.06
   3   2 -23   60.33   14.14
   3  -2 -23   33.48    8.04
   3  -2 -23   42.34   15.64
  -3  -2  23   57.74    8.02
   3   2 -22    8.04   10.47
   3  -2 -22  -11.44    9.43
   3  -2 -22   15.41   12.49
  -3  -2  22    3.28    3.47
  -3  -2  22  -10.84    6.12
   3   2 -21   34.78   11.16
   3  -2 -21   19.99    6.60
   3  -2 -21   19.09   13.21
  -3  -2  21   15.66    5.20
  -3  -2  21   24.77    9.82
   3   2 -20  403.38   22.72
   3  -2 -20  359.89   14.65
   3  -2 -20  394.02   25.86
  -3  -2  20  385.34   14.96
  -3  -2  20  401.47   15.01
   3   2 -19    8.14    9.74
   3  -2 -19   16.85    5.43
   3  -2 -19   -7.60   11.33
  -3  -2  19    4.93    5.75
  -3  -2  19    1.78    5.44
   3   2 -18  512.61   24.45
   3  -2 -18  453.02   17.11
   3  -2 -18  444.16   26.69
  -3  -2  18  490.35   19.00
  -3  -2  18  503.25   21.26
   3   2 -17   27.52    9.76
   3  -2 -17   37.66   17.45
  -3  -2  17   33.32    7.36
  -3  -2  17   31.40    5.88
   3   2 -16   28.09    8.12
   3  -2 -16    6.57    2.38
   3  -2 -16    6.15   16.98
  -3  -2  16    6.94    7.19
  -3  -2  16   12.22    5.03
   3   2 -15  348.85   16.85
   3  -2 -15  363.52   21.49
  -3  -2  15  349.30   12.19
  -3  -2  15  375.74   16.33
   3   2 -14  264.14   13.96
   3  -2 -14  269.47   18.85
  -3  -2  14  251.65   13.41
  -3  -2  14  288.95    9.85
   3   2 -13   37.70   11.23
   3  -2 -13   35.43    9.96
  -3  -2  13   35.07    7.74
  -3  -2  13   32.26    7.63
   3   2 -12  275.59   18.77
   3  -2 -12  280.54   23.61
  -3  -2  12  260.67   10.31
  -3  -2  12  293.87    9.34
   3   2 -11   46.52    7.12
   3  -2 -11   60.97    9.42
  -3  -2  11   46.54    5.32
  -3  -2  11   57.02    7.44
   3   2 -10   62.48    6.81
   3  -2 -10   73.62    9.51
  -3  -2  10   57.88    5.50
  -3  -2  10   71.07    4.88
   3   2  -9   77.74   11.36
  -3   2   9   95.31    6.92
   3  -2  -9   81.21   15.06
  -3  -2   9   81.83    5.57
  -3  -2   9   83.20    5.94
   3   2  -8  542.57   18.15
  -3   2   8  546.66   18.21
   3  -2  -8  558.76   21.94
  -3  -2   8  561.05   17.84
  -3  -2   8  542.25   16.42
   3   2  -7   95.43    7.40
  -3   2   7   85.08   11.94
   3  -2  -7   98.74    9.24
  -3  -2   7   90.98    5.55
  -3  -2   7   85.01    6.36
   3   2  -6 1855.41   65.28
  -3   2   6 1846.15   66.54
   3  -2  -6 1938.30   73.60
  -3  -2   6 1950.94   55.87
  -3  -2   6 1836.36   56.79
   3   2  -5  101.37   10.20
  -3   2   5   84.14   12.23
   3  -2  -5  111.43    8.70
  -3  -2   5  106.00    6.04
  -3  -2   5   96.97    6.81
   3   2  -4  194.30   12.46
  -3   2   4  196.98   15.20
   3  -2  -4  199.39   10.73
  -3  -2   4  206.04    7.79
  -3  -2   4  195.40    9.07
   3   2  -3  396.11   18.23
  -3   2   3  414.47   15.95
   3  -2  -3  417.74   16.22
  -3  -2   3  418.49   15.88
  -3  -2   3  411.18   13.69
   3   2  -2  458.53   15.09
  -3   2   2  490.84   17.25
   3  -2  -2  478.93   22.66
  -3  -2   2  483.21   14.59
  -3  -2   2  469.90   15.18
  -3   2   1   37.00    6.54
   3   2  -1   39.93    7.96
  -3  -2   1   34.68    8.09
  -3  -2   1   29.40    4.97
   3  -2  -1   35.18    6.81
  -3   2   0  171.36   14.12
   3   2   0  165.47   11.38
  -3  -2   0  178.51    8.49
  -3  -2   0  183.48    7.93
   3  -2   0  183.89    9.94
  -3   2  -1   38.33    6.85
   3   2   1   36.82    5.29
  -3  -2  -1   40.19    5.51
  -3  -2  -1   49.02    8.09
   3  -2   1   47.94   10.35
  -3   2  -2  831.05   27.20
   3   2   2  825.65   24.25
  -3  -2  -2  870.00   29.45
  -3  -2  -2  839.19   24.19
   3  -2   2  881.39   27.44
   3   2   3   10.76    7.00
  -3   2  -3   27.54    9.77
   3  -2   3    6.45    5.83
  -3  -2  -3   16.42    4.46
  -3  -2  -3   22.32    4.92
   3   2   4  158.78    7.47
  -3   2  -4  148.87   13.47
   3  -2   4  159.12   12.45
  -3  -2  -4  146.74    7.13
  -3  -2  -4  152.88    7.76
   3   2   5  882.15   29.58
  -3   2  -5  840.64   33.88
   3  -2   5  837.11   30.82
  -3  -2  -5  817.60   23.25
  -3  -2  -5  898.57   31.12
   3   2   6  149.70   10.08
  -3   2  -6  174.33   14.48
   3  -2   6  153.25   11.78
  -3  -2  -6  158.95    7.01
   3   2   7 1510.19   44.72
  -3   2  -7 1561.99   52.35
   3  -2   7 1577.55   53.92
  -3  -2  -7 1517.95   43.08
  -3  -2  -7 1665.39   59.13
  -3   2  -8   -0.86    6.05
  -3  -2  -8    7.57    5.39
   3  -2   8    6.30    7.17
  -3  -2  -8   -0.28    5.52
  -3   2  -9  921.60   38.33
  -3  -2  -9  891.68   22.92
   3  -2   9  946.91   32.94
  -3  -2  -9  889.76   29.45
  -3   2 -10    5.25    6.58
  -3  -2 -10   10.00    4.49
   3  -2  10    7.66    4.96
  -3  -2 -10   10.36    6.30
  -3   2 -11  103.30    9.55
  -3  -2 -11   96.73    6.36
   3  -2  11  106.94    6.78
  -3  -2 -11   99.83   13.73
  -3   2 -12   -2.51   10.92
  -3  -2 -12    7.71    2.77
   3  -2  12   18.09    7.85
  -3  -2 -12   11.40    7.05
  -3   2 -13   18.48    7.92
  -3  -2 -13   19.16    4.23
   3  -2  13   24.10    5.12
  -3  -2 -13   18.88    8.41
  -3   2 -14   -1.00    7.92
  -3  -2 -14    1.54    3.66
   3  -2  14    5.09    6.88
  -3  -2 -14    1.89   11.32
  -3   2 -15  148.02   12.98
   3  -2  15  154.92    8.29
  -3  -2 -15  136.79    7.19
  -3  -2 -15  141.34    6.27
  -3  -2 -15  130.24   18.20
  -3   2 -16  190.62   22.77
  -3  -2 -16  193.27   12.35
   3  -2  16  228.07   13.01
  -3  -2 -16  201.57   14.69
  -3   2 -17    6.68   15.99
  -3  -2 -17   38.72    5.44
   3  -2  17   37.10    5.88
  -3  -2 -17   27.07   10.20
  -3   2 -18   12.86   14.16
  -3  -2 -18    1.07    4.73
   3  -2  18    4.23    7.80
  -3  -2 -18    9.71    9.11
  -3   2 -19  231.74   17.54
  -3  -2 -19  212.88   14.11
   3  -2  19  226.86   10.50
  -3  -2 -19  220.47   16.47
  -3   2 -20   15.03   11.14
  -3  -2 -20   21.41    5.83
   3  -2  20   20.53    6.14
  -3  -2 -20   12.92   10.84
  -3   2 -21   94.18   15.31
  -3  -2 -21   91.67   11.71
   3  -2  21  106.96    8.45
  -3  -2 -21   93.69   14.29
  -3   2 -22  -10.87   11.58
  -3  -2 -22    5.14    6.14
   3  -2  22    7.71    5.96
  -3  -2 -22   -6.39   10.90
  -3   2 -23   16.31   14.02
  -3  -2 -23   30.24    7.23
   3  -2  23   25.31   11.28
  -3  -2 -23   27.41   12.56
  -3   2 -24   14.74   13.34
  -3  -2 -24    3.52   10.90
   3  -2  24    2.18    7.14
  -3  -2 -24   16.42   12.16
  -3   2 -25  121.73   18.85
  -3  -2 -25  104.05   16.90
   3  -2  25  114.61   10.85
  -3  -2 -25  111.13   17.63
  -3   2 -26   61.54   26.03
  -3  -2 -26   54.65    9.98
  -3  -2 -26   54.43   15.88
  -3   2 -27   31.89   24.55
  -3  -2 -27   22.54    9.27
  -3  -2 -27   -2.00   14.73
   3   3 -27   31.63   19.21
   3  -3 -27   28.25   10.06
   3  -3 -27   36.67   21.71
  -3  -3  27   39.91    9.96
   3   3 -26   24.80   18.20
   3  -3 -26   13.08   14.06
   3  -3 -26   27.87   20.19
  -3  -3  26   29.99    9.51
   3   3 -25    8.74   16.77
   3  -3 -25   13.89    8.36
   3  -3 -25   22.05   19.09
  -3  -3  25   37.14   12.80
   3   3 -24   28.11   16.90
   3  -3 -24   26.15    8.39
   3  -3 -24   50.89   18.38
  -3  -3  24   24.21    8.19
   3   3 -23   20.08   14.78
   3  -3 -23   32.02   11.24
   3  -3 -23   17.93   16.68
  -3  -3  23    5.06    6.13
  -3  -3  23   11.67    7.10
   3   3 -22    5.10   13.74
   3  -3 -22   12.61    7.08
   3  -3 -22   18.47   15.15
  -3  -3  22   12.66   10.75
  -3  -3  22    9.75   10.85
   3   3 -21    4.08   13.34
   3  -3 -21   12.28    6.57
   3  -3 -21    6.70   14.94
  -3  -3  21   12.61   11.07
  -3  -3  21   15.04    6.97
   3   3 -20    1.68   11.91
   3  -3 -20   -0.43    1.84
   3  -3 -20   11.49   12.71
  -3  -3  20    9.31   10.88
  -3  -3  20   -2.76    5.96
   3   3 -19    6.51   11.50
   3  -3 -19   28.13   19.78
  -3  -3  19    3.71    7.08
  -3  -3  19    8.19    9.68
   3   3 -18   13.19   11.50
   3  -3 -18   14.46    5.31
   3  -3 -18   -0.11   20.01
  -3  -3  18   11.66   10.88
  -3  -3  18   17.53    6.18
   3   3 -17  299.06   22.34
   3  -3 -17  345.96   11.09
   3  -3 -17  310.71   38.32
  -3  -3  17  359.08   17.30
  -3  -3  17  337.51   17.98
   3   3 -16  315.09   30.02
   3  -3 -16  318.86   26.07
  -3  -3  16  343.15   16.43
  -3  -3  16  351.77   14.34
   3   3 -15 1311.19   69.42
   3  -3 -15 1320.98   64.16
  -3  -3  15 1321.59   57.18
  -3  -3  15 1268.70   41.06
   3   3 -14    6.11    9.50
   3  -3 -14   -3.47   12.21
  -3  -3  14   16.20   10.59
  -3  -3  14    6.49    6.02
   3   3 -13  965.55   41.80
   3  -3 -13 1069.89   64.38
  -3  -3  13  983.59   36.40
  -3  -3  13  994.29   37.10
   3   3 -12   18.72   12.93
  -3   3  12    5.88    8.11
   3  -3 -12    9.64   11.19
  -3  -3  12    8.09    5.91
  -3  -3  12   11.01    6.49
   3   3 -11  119.85   12.03
  -3   3  11  128.87   11.22
   3  -3 -11  119.95   14.80
  -3  -3  11  128.18   11.95
  -3  -3  11  122.29    9.78
   3   3 -10   -3.08    7.63
  -3   3  10   -3.61    7.59
   3  -3 -10   -2.94   14.82
  -3  -3  10   -0.57    5.24
  -3  -3  10    1.26    5.92
   3   3  -9  456.89   27.52
  -3   3   9  444.97   28.14
   3  -3  -9  422.51   23.40
  -3  -3   9  469.11   17.30
  -3  -3   9  450.67   17.76
   3   3  -8  260.98   15.06
  -3   3   8  232.52   20.35
   3  -3  -8  273.68   24.10
  -3  -3   8  261.25   15.75
  -3  -3   8  267.17   12.79
   3   3  -7    2.03    6.87
  -3   3   7    4.76    7.50
   3  -3  -7   -4.41    7.92
  -3  -3   7    0.74    5.23
  -3  -3   7   -2.67    5.96
   3   3  -6   69.52   13.69
  -3   3   6   63.59   10.15
   3  -3  -6   88.29   10.38
  -3  -3   6   74.89    7.33
  -3  -3   6   84.16    7.95
   3   3  -5  330.52   16.03
  -3   3   5  347.53   17.44
   3  -3  -5  411.95   26.82
  -3  -3   5  383.93   15.20
  -3  -3   5  341.04   14.83
   3   3  -4 2448.07   96.20
  -3   3   4 2458.92  110.97
   3  -3  -4 2462.41   99.02
  -3  -3   4 2659.51   95.19
  -3  -3   4 2425.89   88.96
   3   3  -3  150.87   11.51
   3  -3  -3  160.46   13.20
  -3  -3   3  176.54   10.62
  -3  -3   3  188.01   16.02
   3   3  -2 1498.56   54.98
   3  -3  -2 1595.45   59.99
  -3  -3   2 1558.64   53.44
  -3  -3   2 1612.68   63.11
   3   3  -1 1787.31   67.11
  -3   3   1 2079.67   87.01
   3  -3  -1 1937.11   73.43
  -3  -3   1 1844.02   73.12
  -3   3   0  361.52   17.40
   3   3   0  341.12   14.82
  -3  -3   0  319.14   19.44
  -3  -3   0  364.78   15.08
   3  -3   0  345.09   17.35
  -3   3  -1   -4.72    7.11
   3   3   1    5.46    5.84
  -3  -3  -1    3.98    5.53
  -3  -3  -1    1.97    5.87
   3  -3   1   -4.92    7.07
  -3   3  -2   62.58    9.28
   3  -3   2   59.76    8.92
  -3  -3  -2   62.88    8.10
  -3  -3  -2   60.33    7.33
   3   3   3  450.52   23.76
  -3   3  -3  476.23   21.05
   3  -3   3  467.24   20.04
  -3  -3  -3  480.56   17.97
  -3  -3  -3  489.25   19.76
   3   3   4  237.68   16.20
  -3   3  -4  174.89   13.19
  -3  -3  -4  173.67   13.63
  -3  -3  -4  187.32   11.55
   3   3   5  131.71   14.44
  -3   3  -5  138.78   18.57
   3  -3   5  148.42   16.18
  -3  -3  -5  158.46    9.16
  -3  -3  -5  152.97   10.87
   3   3   6  328.46   19.11
  -3   3  -6  326.60   17.21
   3  -3   6  320.01   21.34
  -3  -3  -6  334.64   17.93
  -3  -3  -6  291.69   20.81
   3   3   7  253.71   17.40
  -3   3  -7  263.06   15.76
   3  -3   7  276.18   14.06
  -3  -3  -7  261.69   11.36
  -3  -3  -7  271.69   19.82
   3   3   8    1.97    9.49
  -3   3  -8   10.36   12.31
   3  -3   8    5.05    6.38
  -3  -3  -8   -1.48    4.99
  -3  -3  -8   -5.60    6.82
   3   3   9    5.27    6.23
  -3   3  -9   -2.81    8.38
   3  -3   9   13.80    6.49
  -3  -3  -9    3.21    5.08
  -3  -3  -9   12.00   11.22
   3   3  10   41.58    7.09
  -3   3 -10   34.40   15.17
   3  -3  10   45.65   12.28
  -3  -3 -10   39.74    5.97
  -3  -3 -10   36.87    9.15
  -3   3 -11   19.65    9.02
  -3  -3 -11    8.45    4.56
   3  -3  11   15.92    7.08
  -3  -3 -11    0.98   13.37
  -3   3 -12   14.93    9.43
  -3  -3 -12    0.38    7.09
   3  -3  12    6.37    6.65
  -3  -3 -12   17.89    8.92
  -3   3 -13   38.02   16.23
  -3  -3 -13   30.95    4.72
   3  -3  13   44.18   11.98
  -3  -3 -13   27.10   16.43
  -3   3 -14    9.58    9.82
  -3  -3 -14    9.23    5.69
   3  -3  14    4.22    6.77
  -3  -3 -14   -4.27    9.77
  -3   3 -15   -6.86   10.12
  -3  -3 -15    0.15    5.64
   3  -3  15   15.47   10.83
  -3  -3 -15   12.39    9.85
  -3   3 -16    2.75   10.65
  -3  -3 -16    5.07    3.46
   3  -3  16    2.71    6.21
  -3  -3 -16    0.96   10.19
  -3   3 -17    9.76   18.84
  -3  -3 -17   12.98    3.30
   3  -3  17   29.19   10.65
  -3  -3 -17   33.65   17.70
  -3   3 -18   86.03   22.14
  -3  -3 -18   67.35    5.91
   3  -3  18   81.14    8.66
  -3  -3 -18   55.10   20.18
  -3   3 -19   14.02   12.52
   3  -3  19    2.98   10.45
  -3  -3 -19    7.42    5.83
  -3  -3 -19    7.39    4.18
  -3  -3 -19   17.46   11.45
  -3   3 -20   19.53   12.69
  -3  -3 -20    4.07    9.40
   3  -3  20   11.87    6.77
  -3  -3 -20   -7.87   12.27
  -3   3 -21    7.97   14.67
  -3  -3 -21   18.65    6.39
  -3  -3 -21   15.12   13.51
  -3   3 -22   41.15   17.17
  -3  -3 -22   37.74    7.58
   3  -3  22   46.14    8.22
  -3  -3 -22   54.62   15.32
  -3   3 -23    4.62   16.51
  -3  -3 -23   33.13   11.60
   3  -3  23   31.47    8.42
  -3  -3 -23   15.14   14.28
  -3   3 -24   31.71   17.31
  -3  -3 -24   14.63    7.79
   3  -3  24   32.17   12.78
  -3  -3 -24   26.19   15.53
  -3   3 -25  -28.02   15.73
  -3  -3 -25    6.61   10.89
   3  -3  25    0.36    7.61
  -3  -3 -25   18.35   14.43
  -3   3 -26   10.31   17.18
  -3  -3 -26   13.71    7.95
   3  -3  26   -0.17    8.53
  -3  -3 -26   -7.31   16.27
   3   4 -25   37.95   30.97
   3  -4 -25   17.31    9.69
   3  -4 -25   42.07   21.70
  -3  -4  25   40.57   14.17
   3   4 -24   47.59   31.38
   3  -4 -24   49.70    9.79
   3  -4 -24   20.84   22.19
  -3  -4  24   30.47   11.75
  -3  -4  24   38.69    9.51
   3   4 -23   32.81   26.67
   3  -4 -23    3.37   18.78
  -3  -4  23    8.79   16.04
  -3  -4  23    1.31    7.46
   3   4 -22   33.71   17.21
   3  -4 -22   17.67   19.23
  -3  -4  22   19.62   11.73
  -3  -4  22   27.20   13.09
   3   4 -21   26.84   16.93
   3  -4 -21   21.34   17.87
  -3  -4  21   13.26   11.61
  -3  -4  21   23.70    7.92
   3   4 -20   19.29   14.77
   3  -4 -20    8.48    7.68
   3  -4 -20   14.55   15.92
  -3  -4  20   -5.06   15.75
  -3  -4  20   -6.92   11.13
   3   4 -19   15.84   13.60
   3  -4 -19    0.80    5.60
   3  -4 -19    8.79   15.77
  -3  -4  19    3.38    9.97
  -3  -4  19   -2.08    7.11
   3   4 -18   36.30   14.63
   3  -4 -18   15.29    6.72
   3  -4 -18   15.47   24.56
  -3  -4  18   19.67   10.64
  -3  -4  18   21.73    7.64
   3   4 -17   42.99   15.31
   3  -4 -17   57.16    8.30
   3  -4 -17   57.73   27.45
  -3  -4  17   55.08   17.44
  -3  -4  17   50.07   13.49
   3   4 -16   38.53   19.83
   3  -4 -16   14.92   14.80
  -3  -4  16   -1.10   15.67
  -3  -4  16    9.11    7.47
   3   4 -15   71.15   15.36
   3  -4 -15   80.79   17.92
  -3  -4  15   82.47   12.46
  -3  -4  15   80.79   15.25
   3   4 -14   80.88   16.23
   3  -4 -14   92.54   18.34
  -3  -4  14  108.95   12.83
  -3  -4  14  105.19   10.30
   3   4 -13  736.01   40.13
  -3   4  13  689.84   33.88
   3  -4 -13  766.42   60.64
  -3  -4  13  888.42   42.40
  -3  -4  13  825.96   36.11
   3   4 -12 1104.92   67.65
  -3   4  12 1077.89   48.37
   3  -4 -12 1068.38   57.60
  -3  -4  12 1142.82   44.61
  -3  -4  12 1147.03   47.56
   3   4 -11   26.26   12.28
  -3   4  11   26.41   11.71
   3  -4 -11   15.88   14.33
  -3  -4  11   35.25   13.74
  -3  -4  11   39.88    9.71
   3   4 -10  309.48   29.05
  -3   4  10  291.20   20.12
  -3  -4  10  281.55   15.98
   3  -4 -10  297.47   22.96
   3   4  -9   -5.38    9.39
  -3   4   9   15.52   16.20
  -3  -4   9    0.09    7.40
   3  -4  -9    0.98   10.63
   3   4  -8    7.23    9.25
  -3   4   8  -14.66   10.36
  -3  -4   8    0.71   11.17
   3  -4  -8  -23.44   17.11
   3   4  -7   14.26    9.94
  -3   4   7   22.59   10.80
  -3  -4   7   12.70    7.92
   3  -4  -7    4.48   10.84
   3   4  -6   13.61   14.78
  -3   4   6   12.51   16.54
  -3  -4   6   15.55    8.10
   3  -4  -6    7.06   10.92
   3   4  -5   -1.68    8.89
  -3   4   5    3.01    9.39
  -3  -4   5   -0.42   11.16
   3  -4  -5    0.75   10.06
  -3   4   4   35.04   11.31
   3   4  -4   26.48   10.23
  -3  -4   4   37.43    8.53
  -3  -4   4   32.45    8.74
   3  -4  -4   46.85   10.92
  -3   4   3   15.45   14.43
   3   4  -3   -5.09   13.10
  -3  -4   3  -14.15    7.31
  -3  -4   3   14.38    7.38
   3  -4  -3    2.69   14.93
   3   4  -2   -3.49    8.38
   3  -4  -2    9.81    9.78
  -3  -4   2   -3.20    7.47
  -3  -4   2   -7.28    8.11
   3   4  -1   32.90    9.65
  -3   4   1   51.77   11.26
   3  -4  -1   81.41   11.47
  -3  -4   1   36.63    9.31
   3   4   0  232.05   15.77
  -3   4   0  245.58   18.32
  -3  -4   0  240.94   15.81
  -3  -4   0  270.71   14.93
   3   4   1  118.60   11.97
  -3  -4  -1  107.52   11.07
  -3  -4  -1   98.00   11.19
  -3   4  -2  254.28   19.05
   3  -4   2  254.72   18.02
  -3  -4  -2  250.64   16.31
  -3  -4  -2  234.25   19.90
  -3   4  -3  639.42   33.54
  -3  -4  -3  640.27   25.91
   3  -4   3  659.04   30.73
  -3   4  -4  757.17   51.84
  -3  -4  -4  712.79   34.13
  -3   4  -5  415.52   26.20
   3   4   5  436.77   21.83
  -3  -4  -5  457.70   20.55
  -3  -4  -5  435.07   23.37
   3  -4   5  466.50   25.00
   3   4   6   63.51   10.93
  -3   4  -6   62.29   21.79
   3  -4   6   71.31   11.58
  -3  -4  -6   50.83   13.50
  -3  -4  -6  124.90   19.56
   3   4   7  359.88   28.57
  -3   4  -7  389.93   24.86
   3  -4   7  374.93   29.09
  -3  -4  -7  419.37   18.51
  -3  -4  -7  392.97   23.20
   3   4   8   12.53   13.58
  -3   4  -8   -0.68   10.61
   3  -4   8   -6.60    9.06
  -3  -4  -8    6.65    6.77
  -3  -4  -8   -3.22    8.81
   3   4   9   -3.53    8.39
  -3   4  -9   15.06   10.85
   3  -4   9    0.96    8.55
  -3  -4  -9   11.27   10.01
  -3  -4  -9    4.06   14.32
   3   4  10   -1.38    8.07
  -3   4 -10   16.40   17.01
   3  -4  10   16.15   12.80
  -3  -4 -10    5.22    6.59
  -3  -4 -10   -2.17    9.52
   3   4  11  106.47   18.43
  -3   4 -11  101.73   16.03
   3  -4  11  136.49   13.17
  -3  -4 -11  115.06   13.67
  -3  -4 -11  142.17   21.57
   3   4  12   32.35    9.14
  -3   4 -12   35.47   13.35
   3  -4  12   46.45    9.83
  -3  -4 -12   46.79    7.75
  -3  -4 -12   48.09   11.97
  -3   4 -13  116.70   26.19
  -3  -4 -13  124.59   14.06
   3  -4  13  106.40   12.86
  -3  -4 -13  112.28   14.96
  -3   4 -14   55.32   15.27
  -3  -4 -14   44.55    7.18
   3  -4  14   56.84   10.23
  -3  -4 -14   49.48   20.27
  -3   4 -15   77.18   17.67
  -3  -4 -15   79.80   10.88
   3  -4  15  112.68   17.69
  -3  -4 -15   91.08   15.68
  -3   4 -16  308.89   41.67
  -3  -4 -16  344.38   14.26
   3  -4  16  353.77   19.77
  -3  -4 -16  361.47   26.21
  -3   4 -17    5.69   20.70
  -3  -4 -17   -0.72    4.72
   3  -4  17    0.72   13.42
  -3  -4 -17   -3.33   12.63
  -3   4 -18  120.03   22.05
  -3  -4 -18  128.27   12.04
   3  -4  18  155.92   12.76
  -3  -4 -18  149.22   30.16
  -3   4 -19  314.66   32.55
  -3  -4 -19  349.40   13.35
   3  -4  19  391.05   20.22
  -3  -4 -19  352.93   41.49
  -3   4 -20    2.46   16.00
  -3  -4 -20    2.81    3.97
   3  -4  20    6.83    8.31
  -3  -4 -20    3.77   13.75
  -3   4 -21   15.31   18.81
   3  -4  21   39.52    9.52
  -3  -4 -21   21.82    7.83
  -3  -4 -21   23.48    4.11
  -3  -4 -21   50.95   16.35
  -3   4 -22   94.69   22.83
  -3  -4 -22   90.21    9.62
   3  -4  22   90.54   11.03
  -3  -4 -22   83.68   20.87
  -3   4 -23   29.85   28.44
  -3  -4 -23   14.41   11.28
   3  -4  23    0.53    8.64
  -3  -4 -23   -4.39   16.12
  -3   4 -24   51.92   29.84
  -3  -4 -24   -2.50    7.55
   3  -4  24    3.67   13.68
  -3  -4 -24  -27.42   16.88
   3   5 -22   46.32   31.90
   3  -5 -22   -2.22   34.70
  -3  -5  22   29.04   15.99
  -3  -5  22   26.76    9.95
   3   5 -21   33.95   32.80
   3  -5 -21   24.11   23.46
  -3  -5  21   92.54   24.89
  -3  -5  21   33.09   10.39
   3   5 -20  163.75   38.03
   3  -5 -20   82.19   17.23
   3  -5 -20  110.90   27.06
  -3  -5  20  162.15   30.61
  -3  -5  20  119.77   12.75
   3   5 -19    6.10   18.23
   3  -5 -19   10.66   12.33
   3  -5 -19   -1.33   19.07
  -3  -5  19   24.52   14.69
  -3  -5  19   -1.42   14.79
   3   5 -18  -11.03   17.07
   3  -5 -18   13.98    8.73
   3  -5 -18   -4.01   17.58
  -3  -5  18    5.84   13.48
  -3  -5  18   11.75    8.86
   3   5 -17    0.67   16.45
   3  -5 -17    2.48    9.34
   3  -5 -17    2.48   25.68
  -3  -5  17   14.58   19.50
  -3  -5  17    2.67   13.07
   3   5 -16   14.18   24.26
   3  -5 -16   47.91   28.49
  -3  -5  16   10.14   21.16
  -3  -5  16    9.66    9.94
   3   5 -15   20.42   23.09
  -3   5  15   12.89   11.60
   3  -5 -15   -6.07   17.17
  -3  -5  15   11.93    9.33
  -3  -5  15    3.19   12.70
   3   5 -14   87.86   19.36
  -3   5  14  106.14   15.12
   3  -5 -14   95.44   22.00
  -3  -5  14  118.99   13.44
  -3  -5  14  109.53   16.90
   3   5 -13   39.88   16.43
  -3   5  13   37.17   14.06
   3  -5 -13   58.67   27.57
  -3  -5  13   46.07   11.05
  -3  -5  13   62.64   14.14
   3   5 -12  387.21   41.07
  -3   5  12  355.69   25.01
   3  -5 -12  349.53   31.07
  -3  -5  12  398.78   24.17
  -3  -5  12  418.04   26.28
   3   5 -11   24.58   14.47
  -3   5  11   23.66   12.60
   3  -5 -11   19.49   15.99
  -3  -5  11   17.10   10.08
  -3  -5  11   30.90   12.02
   3   5 -10   37.54   15.08
  -3   5  10   41.48   20.03
   3  -5 -10   27.41   24.97
  -3  -5  10   51.94   11.32
  -3  -5  10   48.16   12.48
   3   5  -9   30.45   20.62
  -3   5   9   24.86   13.01
   3  -5  -9   31.67   15.56
  -3  -5   9    9.84   15.38
  -3  -5   9   13.36   11.24
   3   5  -8   -6.00   12.93
  -3   5   8  -17.72   19.81
   3  -5  -8   14.99   13.86
  -3  -5   8   13.00   10.02
  -3  -5   8   13.00   10.15
  -3   5   7  134.02   17.69
   3   5  -7  116.30   26.69
  -3  -5   7  136.58   14.66
  -3  -5   7  118.78   20.37
   3  -5  -7  134.68   27.44
   3   5  -6   28.03   13.77
   3  -5  -6   32.13   15.68
  -3  -5   6   56.76   11.45
  -3  -5   6   37.00   11.28
  -3   5   5  213.30   21.07
   3   5  -5  229.40   30.09
  -3  -5   5  227.20   17.37
  -3  -5   5  236.53   26.44
   3  -5  -5  234.30   33.55
   3   5  -4   -9.14   11.50
  -3   5   4  -11.36   12.23
   3  -5  -4  -13.91   15.30
  -3  -5   4    7.57    9.90
  -3   5   3  109.99   26.67
  -3  -5   3  130.79   15.83
  -3   5   2  275.82   23.22
   3   5  -2  285.29   30.26
  -3  -5   2  281.37   18.93
  -3  -5   2  242.81   28.09
   3  -5  -2  302.18   24.61
   3   5  -1   13.19   11.35
   3  -5  -1    2.69   12.48
  -3  -5   1   17.25    9.73
  -3  -5   1   13.88   10.64
   3   5   0   81.63   19.27
  -3   5   0   34.20   14.14
  -3  -5   0   33.10   10.74
   3   5   1  142.94   15.83
   3  -5   1  142.35   18.27
  -3  -5  -1  138.77   14.26
  -3  -5  -1  116.02   16.28
  -3   5  -2  363.39   27.96
   3   5   2  352.30   23.58
  -3  -5  -2  344.85   29.80
  -3  -5  -2  333.62   23.95
   3  -5   2  442.26   37.61
   3   5   3  265.54   28.25
   3  -5   3  227.50   22.16
  -3  -5  -3  299.01   31.25
   3   5   4   19.33   11.32
  -3  -5  -4   13.82    9.00
  -3  -5  -4  -11.21   11.43
  -3   5  -5  503.18   35.75
   3   5   5  557.64   29.52
  -3  -5  -5  573.88   27.41
  -3  -5  -5  537.00   44.69
   3  -5   5  571.55   32.83
  -3   5  -6  108.52   19.70
  -3  -5  -6   44.73   17.51
   3  -5   6   64.59   15.52
   3   5   7  942.50   44.74
  -3   5  -7  834.48   52.54
   3  -5   7  991.79   63.75
  -3  -5  -7  960.79   49.57
  -3  -5  -7  858.70   52.20
   3   5   8  173.14   16.98
  -3   5  -8  172.69   24.03
   3  -5   8  200.88   19.86
  -3  -5  -8  169.32   15.31
  -3  -5  -8  213.80   21.60
   3   5   9   94.60   20.80
  -3   5  -9   94.24   29.47
   3  -5   9   92.95   22.63
  -3  -5  -9  130.76   13.11
  -3  -5  -9   78.80   25.38
   3   5  10   84.46   13.49
  -3   5 -10   92.37   19.18
   3  -5  10   89.56   15.31
  -3  -5 -10   89.10   17.23
  -3  -5 -10   88.12   17.07
   3   5  11   87.13   13.03
  -3   5 -11   78.04   28.76
   3  -5  11   69.88   14.17
  -3  -5 -11   80.06   11.24
  -3  -5 -11   62.86   24.65
   3   5  12  329.20   31.11
  -3   5 -12  332.44   30.55
   3  -5  12  342.10   24.48
  -3  -5 -12  385.53   27.28
  -3  -5 -12  284.23   27.62
   3   5  13  175.29   16.20
  -3   5 -13  179.03   25.01
   3  -5  13  188.37   18.56
  -3  -5 -13  190.09   14.07
  -3  -5 -13  197.14   22.32
  -3   5 -14  177.52   25.96
  -3  -5 -14  227.54   14.73
   3  -5  14  169.39   18.94
  -3  -5 -14  166.15   32.30
  -3   5 -15   20.79   24.81
  -3  -5 -15   21.52   11.73
   3  -5  15    7.91   10.60
  -3  -5 -15  -15.01   13.82
  -3   5 -16   40.95   18.66
  -3  -5 -16   40.98    8.94
   3  -5  16   28.86   12.15
  -3  -5 -16   31.81   16.39
  -3   5 -17   -9.23   17.89
  -3  -5 -17    2.23   10.79
   3  -5  17  -19.80   10.65
  -3  -5 -17   -3.68   15.42
  -3   5 -18  157.13   26.38
  -3  -5 -18  147.58   16.80
   3  -5  18  142.73   17.01
  -3  -5 -18  167.21   34.26
  -3   5 -19  138.69   32.74
  -3  -5 -19   53.29    8.45
   3  -5  19   42.77   17.93
  -3  -5 -19   41.34   19.59
  -3   5 -20    2.15   28.75
  -3  -5 -20    4.47    9.04
   3  -5  20    6.84    9.91
  -3  -5 -20   -7.89   16.21
  -3   5 -21  101.33   39.84
  -3  -5 -21   91.95   12.34
   3  -5  21  122.87   21.33
  -3  -5 -21   95.98   23.56
   3   6 -18   21.54   32.42
   3  -6 -18   22.95   12.35
   3  -6 -18   33.33   21.96
  -3  -6  18   -1.61   17.68
  -3  -6  18    8.46   16.93
   3   6 -17   -7.50   20.22
   3  -6 -17   22.52   18.07
   3  -6 -17   40.40   21.08
  -3  -6  17   16.52   15.42
  -3  -6  17   -6.51   11.62
   3   6 -16   24.45   20.30
  -3   6  16   25.59   13.83
   3  -6 -16   11.87   12.51
   3  -6 -16   26.05   21.55
  -3  -6  16   13.48   11.45
  -3  -6  16   18.89   24.38
   3   6 -15   58.12   21.13
  -3   6  15   37.82   14.72
   3  -6 -15  108.86   33.50
  -3  -6  15   28.50   13.80
  -3  -6  15   43.86   25.27
   3   6 -14  -22.09   27.34
  -3   6  14   29.26   21.65
   3  -6 -14   25.23   29.39
  -3  -6  14   -1.39   11.30
  -3  -6  14    8.58   22.79
   3   6 -13   25.20   17.72
  -3   6  13   -6.45   13.22
   3  -6 -13  -20.76   18.54
  -3  -6  13    8.90   18.17
  -3  -6  13   18.63   13.91
   3   6 -12   26.51   19.12
  -3   6  12   14.26   23.39
   3  -6 -12   29.18   20.41
  -3  -6  12   35.74   12.44
  -3  -6  12   19.22   15.05
   3   6 -11   72.08   31.92
  -3   6  11  103.00   17.83
   3  -6 -11   56.97   34.23
  -3  -6  11   60.83   23.72
  -3  -6  11   79.13   17.57
  -3   6  10  135.49   34.97
   3   6 -10  189.93   25.72
  -3  -6  10  202.48   21.36
  -3  -6  10  180.64   20.23
   3  -6 -10  148.77   27.99
   3   6  -9    6.58   17.40
  -3   6   9   65.60   16.23
   3  -6  -9   11.87   20.01
  -3  -6   9    9.84   14.02
  -3   6   8   64.37   27.68
   3   6  -8   75.92   29.91
  -3  -6   8   87.16   16.11
  -3  -6   8   54.64   15.23
   3  -6  -8   67.69   32.41
  -3   6   7    8.16   14.13
   3   6  -7  -26.64   15.04
  -3  -6   7   11.14   12.50
  -3  -6   7   -6.58   17.90
   3  -6  -7  -13.96   17.68
   3   6  -6   95.15   27.71
   3  -6  -6  -34.41   29.78
  -3  -6   6   22.54   13.89
  -3   6   5  396.89   31.03
   3   6  -5  374.82   32.14
  -3  -6   5  397.76   27.74
  -3  -6   5  362.20   38.56
   3  -6  -5  281.27   35.82
   3   6  -4   69.74   21.88
  -3  -6   4  115.00   16.47
  -3  -6   4   69.63   17.10
  -3   6   3  136.41   20.74
   3   6  -3  106.13   19.09
  -3  -6   3   87.86   16.55
  -3  -6   3   98.02   26.96
   3  -6  -3  106.94   21.28
  -3   6   2   69.66   26.65
   3   6  -2   24.46   16.46
  -3  -6   2   26.15   14.24
  -3  -6   2   28.30   14.47
   3  -6  -2   64.59   18.52
   3   6  -1  108.79   20.08
  -3   6   1   47.28   19.16
  -3  -6   1  123.03   27.50
  -3   6   0  266.95   41.04
   3   6   0  257.26   36.05
  -3  -6   0  275.99   31.32
  -3  -6   0  239.86   24.64
   3  -6   0  292.91   29.49
  -3   6  -1  198.39   26.84
  -3  -6  -1  249.70   34.96
   3  -6   1  255.07   36.26
  -3   6  -2   -3.51   24.71
   3   6   2   23.22   20.94
  -3  -6  -2   -5.77   11.40
  -3  -6  -2   19.55   13.69
   3  -6   2   10.26   14.16
  -3   6  -3   48.32   18.34
   3   6   3    2.84   13.96
  -3  -6  -3   20.23   12.23
  -3  -6  -3   50.69   23.55
   3  -6   3   22.23   24.61
  -3   6  -4  118.48   33.09
   3   6   4  106.75   27.29
  -3  -6  -4  126.39   15.88
  -3  -6  -4  135.84   20.03
   3  -6   4  129.23   21.20
  -3   6  -5    4.93   16.54
   3   6   5   11.70   13.99
  -3  -6  -5    3.63   11.38
  -3  -6  -5   44.23   22.94
   3  -6   5  -18.03   23.62
  -3   6  -6   60.01   19.82
   3   6   6   73.66   16.06
  -3  -6  -6   78.21   21.35
  -3  -6  -6   81.71   17.87
   3  -6   6   63.02   16.97
  -3   6  -7  -50.04   26.40
   3   6   7   12.17   13.28
  -3  -6  -7    5.50   11.30
  -3  -6  -7    3.37   23.47
   3  -6   7   42.65   22.06
  -3   6  -8  112.64   23.73
   3   6   8  139.41   18.54
  -3  -6  -8  139.25   15.50
  -3  -6  -8  125.90   21.98
   3  -6   8  114.79   20.94
  -3   6  -9   19.23   18.47
   3   6   9    7.07   20.97
  -3  -6  -9   27.91   11.82
  -3  -6  -9    0.27   16.37
   3  -6   9    7.73   22.24
   3   6  10   22.29   12.67
  -3   6 -10  -10.52   17.77
   3  -6  10   13.01   14.15
  -3  -6 -10   14.59   16.66
  -3  -6 -10  -13.00   23.52
   3   6  11   69.02   23.55
  -3   6 -11   60.30   21.68
   3  -6  11   75.61   24.54
  -3  -6 -11   72.79   13.35
  -3  -6 -11   50.18   18.89
   3   6  12   -4.28   12.05
  -3   6 -12   11.92   18.07
   3  -6  12    1.74   13.97
  -3  -6 -12    9.19   10.68
  -3  -6 -12   16.37   15.23
   3   6  13   24.23   18.49
  -3   6 -13    7.92   30.54
   3  -6  13   30.66   23.67
  -3  -6 -13   24.01   16.82
  -3  -6 -13   20.88   25.88
   3   6  14   -9.18   11.37
  -3   6 -14   -5.66   19.22
   3  -6  14    9.60   12.71
  -3  -6 -14   -2.01   10.08
  -3  -6 -14    6.79   16.39
  -3   6 -15  109.17   26.20
  -3  -6 -15  113.85   21.74
   3  -6  15   87.26   27.57
  -3  -6 -15   86.44   22.75
  -3   6 -16    6.03   20.24
  -3  -6 -16    7.38    9.76
   3  -6  16   -4.55   12.50
  -3  -6 -16   10.24   26.96
  -3   6 -17   57.14   32.95
  -3  -6 -17   19.47   10.32
   3  -6  17    9.53   13.88
  -3  -6 -17   -5.55   28.53
  -3   7  12   19.94   25.76
   3   7 -12   21.25   31.95
  -3  -7  12   13.18   24.11
  -3  -7  12    2.37   13.84
   3  -7 -12    8.26   33.99
  -3   7  11   18.60   16.49
   3   7 -11    4.25   20.69
  -3  -7  11    9.60   24.23
  -3  -7  11  -24.64   22.25
   3  -7 -11   13.09   21.54
  -3   7  10  -38.12   25.12
   3   7 -10    8.19   19.54
  -3  -7  10   17.53   22.81
  -3  -7  10   -9.27   14.07
   3  -7 -10   11.95   21.59
  -3   7   9   27.36   21.05
   3   7  -9   59.02   35.31
  -3  -7   9   92.55   28.77
  -3  -7   9   64.37   25.21
   3  -7  -9   47.82   37.55
  -3   7   8   14.20   25.73
   3   7  -8    3.31   18.81
  -3  -7   8   31.82   24.76
  -3  -7   8   11.17   15.13
   3  -7  -8   -9.97   19.95
  -3   7   7    4.61   16.80
   3   7  -7  -21.44   17.72
  -3  -7   7    4.99   23.32
  -3  -7   7   23.19   13.90
   3  -7  -7  -25.55   18.81
  -3   7   6   24.92   16.27
   3   7  -6   -3.72   26.16
  -3  -7   6  -26.41   23.00
  -3  -7   6   -2.32   15.05
   3  -7  -6   21.44   28.95
  -3   7   5    4.99   17.19
   3   7  -5    0.00   17.24
  -3  -7   5   16.69   22.49
  -3  -7   5    4.45   14.45
   3  -7  -5  -17.12   18.52
  -3   7   4  -11.38   17.04
   3   7  -4   38.95   26.02
  -3  -7   4  -49.76   21.73
  -3  -7   4   17.80   22.81
   3  -7  -4    7.75   18.17
  -3   7   3   13.43   27.69
   3   7  -3   15.63   16.89
  -3  -7   3  -12.55   21.74
  -3  -7   3   12.48   15.50
   3  -7  -3  -23.35   29.09
  -3   7   2   10.08   20.14
   3   7  -2   16.02   17.89
  -3  -7   2   18.34   15.39
  -3  -7   2   55.28   25.75
   3  -7  -2   56.73   20.92
  -3   7   1   15.05   31.39
   3   7  -1   46.81   18.78
  -3  -7   1   35.82   15.91
  -3  -7   1   32.29   18.30
   3  -7  -1   81.76   31.97
  -3   7   0   49.95   19.47
   3   7   0   18.59   18.57
  -3  -7   0    9.49   15.00
  -3  -7   0   69.58   27.48
   3  -7   0   23.52   19.41
  -3   7  -1   58.51   23.32
   3   7   1   77.48   31.21
  -3  -7  -1   89.08   17.43
  -3  -7  -1   76.85   21.22
   3  -7   1   83.32   22.72
  -3   7  -2   82.22   34.08
   3   7   2   62.84   19.84
  -3  -7  -2   52.81   16.53
  -3  -7  -2   55.92   20.19
   3  -7   2   41.88   21.29
  -3   7  -3    9.79   18.61
   3   7   3   16.00   24.44
  -3  -7  -3    7.44   13.94
  -3  -7  -3   -4.14   27.23
   3  -7   3   25.90   19.17
  -3   7  -4   -7.68   30.05
   3   7   4   24.79   16.57
  -3  -7  -4    4.03   22.28
  -3  -7  -4   26.57   17.34
   3  -7   4   16.70   27.42
  -3   7  -5   13.46   19.52
   3   7   5   14.58   23.08
  -3  -7  -5   -6.65   19.86
  -3  -7  -5    7.71   27.00
   3  -7   5   12.02   17.04
  -3   7  -6   31.96   20.35
   3   7   6   11.17   16.28
  -3  -7  -6    8.38   13.38
  -3  -7  -6   13.52   17.35
   3  -7   6   -1.10   28.49
  -3   7  -7  -20.99   31.14
   3   7   7   28.58   24.61
  -3  -7  -7   16.62   14.25
  -3  -7  -7   37.16   18.53
   3  -7   7   16.08   18.34
  -3   7  -8   14.58   21.60
   3   7   8   35.80   16.55
  -3  -7  -8    9.26   14.26
  -3  -7  -8   52.28   29.21
   3  -7   8   30.64   18.91
  -3   7  -9   15.89   19.56
   3   7   9   12.21   20.97
  -3  -7  -9  -11.97   19.91
  -3  -7  -9  -13.21   17.96
   3  -7   9   -9.83   15.30
  -3   7 -10   29.88   31.90
   3   7  10    4.32   15.16
  -3  -7 -10   16.61   13.12
  -3  -7 -10   11.08   18.43
   3  -7  10    0.69   16.57
  -3   7 -11    1.39   21.77
   3   7  11   33.20   23.29
  -3  -7 -11   -4.14   12.74
  -3  -7 -11   22.63   29.11
   3  -7  11   17.04   24.51
   4   0 -29   12.12   12.61
   4   0 -29    6.78   14.78
   4   0 -28  462.62   28.80
   4   0 -27   -4.92   11.21
   4   0 -26  312.22   21.47
   4   0 -25  -13.10   13.89
   4   0 -24   -2.69    8.31
   4   0 -23   -0.69    7.67
   4   0 -22   25.92    8.06
   4   0 -21   -3.39   10.92
   4   0 -20   25.44   10.28
   4   0 -19    3.09    5.78
   4   0 -18   12.14    5.87
   4   0 -17   -2.06    5.06
   4   0 -16   -1.18    7.43
   4   0 -15   -3.40    6.53
   4   0 -14   10.07    4.00
   4   0 -13    7.02    3.53
   4   0 -12   12.03    2.87
   4   0 -12    6.70    3.40
   4   0 -11   -0.51    2.82
   4   0 -11   11.04    4.69
   4   0 -10 4266.49  137.12
   4   0 -10 3822.70  128.12
   4   0  -9    2.19    2.90
   4   0  -9    4.79    2.67
   4   0  -8  794.90   16.58
   4   0  -8  771.84   18.24
   4   0  -7    0.07    2.58
   4   0  -7    0.66    3.12
   4   0  -6  292.77    7.21
   4   0  -6  278.98    5.71
   4   0  -5    2.75    3.22
   4   0  -5    4.08    2.74
   4   0  -4  534.07    9.99
   4   0  -4  511.73    8.74
   4   0  -3   -0.12    3.66
   4   0  -3   -0.04    2.24
   4   0  -2 3873.50  120.39
   4   0  -2 4349.49  133.69
   4   0  -1    9.13    2.87
   4   0  -1    4.04    2.71
   4   0   037503.01 4024.07
   4   0   037993.33 3969.37
  -4   0   037628.10 3847.81
  -4   0  -1   -2.07    2.07
   4   0   236947.11 3900.71
   4   0   236803.94 3712.30
  -4   0  -237405.20 3897.10
   4   0   3   -4.73    2.64
   4   0   3   -0.26    1.55
  -4   0  -3    0.08    2.42
   4   0   417320.29 1146.19
   4   0   417587.24 1110.95
  -4   0  -416837.81 1117.35
   4   0   5    0.38    2.34
   4   0   5    0.25    2.06
  -4   0  -5   -1.71    3.03
   4   0   6  347.56    7.44
   4   0   6  352.87    7.24
  -4   0  -6  362.65    9.54
   4   0   7   -0.96    3.30
   4   0   7   -0.23    1.61
  -4   0  -7   -4.14    3.64
   4   0   8   82.37    4.93
   4   0   8   82.40    4.25
  -4   0  -8   84.34    3.92
   4   0   9    0.46    2.17
   4   0   9    6.09    2.09
  -4   0  -9   -0.96    2.86
   4   0  10   36.96    2.65
   4   0  10   39.79    2.98
  -4   0 -10   33.53    3.89
   4   0  11   -4.61    3.20
   4   0  11   -2.19    2.53
  -4   0 -11    4.31    3.52
   4   0  12  156.95    6.11
  -4   0 -12  167.14    6.98
   4   0  13   -0.52    2.10
  -4   0 -13   -4.40    4.10
   4   0  14    2.40    3.34
  -4   0 -14    7.25    4.61
   4   0  15   -3.97    3.68
  -4   0 -15    3.35    4.75
   4   0  16  315.72    9.00
  -4   0 -16  302.95   12.49
   4   0  17   -2.25    3.84
  -4   0 -17   11.06    5.49
   4   0  18    8.98    3.95
  -4   0 -18   12.67    6.51
   4   0  19    3.86    2.86
  -4   0 -19    3.91   10.14
   4   0  20    1.70    4.54
  -4   0 -20    6.34   10.03
   4   0  21    0.41    4.26
  -4   0 -21   -3.58   11.79
   4   0  22  408.93   11.46
  -4   0 -22  440.99   21.67
   4   0  23    0.14    2.70
  -4   0 -23   -1.85    8.59
  -4   0 -24   -8.81    9.49
  -4   0 -25    1.19    9.66
  -4   0 -26   88.03   20.06
  -4   0 -27  -13.12   18.88
  -4   0 -28   14.83   13.11
   4   1 -28   55.78   15.61
   4  -1 -28   41.92   18.32
   4  -1 -28   31.43   17.37
   4   1 -27   27.86   21.91
   4  -1 -27   14.24   15.11
   4  -1 -27   20.44   15.32
   4   1 -26   17.66   16.91
   4  -1 -26    4.91    8.15
   4  -1 -26  -25.36   13.55
   4   1 -25   66.21   13.12
   4  -1 -25   53.83   10.01
   4  -1 -25   52.51   15.86
   4   1 -24   -6.46   10.62
   4  -1 -24    8.91   12.21
   4  -1 -24   23.57   19.92
   4   1 -23   13.51   10.16
   4  -1 -23   16.98    7.18
   4  -1 -23   11.73   20.19
   4   1 -22  159.47   14.25
   4  -1 -22  150.34   10.28
   4  -1 -22  142.16   23.59
   4   1 -21    3.10    8.74
   4  -1 -21    9.92    6.28
   4  -1 -21    8.43   15.78
   4   1 -20   28.96   13.96
   4  -1 -20   37.45    9.78
   4  -1 -20   45.49   10.70
   4   1 -19  136.21   17.19
   4  -1 -19  131.79    8.44
   4  -1 -19  140.26   13.72
   4   1 -18  235.53   18.33
   4  -1 -18  222.88   10.51
   4  -1 -18  237.40   16.37
   4   1 -17  491.18   24.74
   4  -1 -17  518.53   20.47
   4  -1 -17  500.54   23.20
   4   1 -16  218.15   11.09
   4  -1 -16  229.53    9.19
   4  -1 -16  222.92   14.31
  -4  -1  16  207.99    5.30
  -4  -1  16  234.80    8.98
   4   1 -15  135.11    8.39
   4  -1 -15  126.92    6.83
   4  -1 -15  139.55   16.72
  -4  -1  15  122.82    3.48
  -4  -1  15  142.82    7.03
   4   1 -14  845.47   26.03
   4  -1 -14  850.73   22.91
   4  -1 -14  891.33   15.40
   4  -1 -14  900.56   38.80
  -4  -1  14  855.11   18.87
  -4  -1  14  902.01   23.21
   4   1 -13    6.90    4.80
   4  -1 -13   11.36    3.92
   4  -1 -13   11.43    1.53
   4  -1 -13   10.70   11.64
  -4  -1  13    8.58    2.07
  -4  -1  13    6.20    5.64
   4   1 -12   -0.35    4.18
   4  -1 -12   -0.78    1.52
   4  -1 -12    9.41    6.16
  -4  -1  12    3.75    2.87
  -4  -1  12    0.13    3.16
   4   1 -11 1102.75   30.97
   4  -1 -11 1233.96   38.60
  -4  -1  11 1196.07   30.45
  -4  -1  11 1226.38   28.91
   4   1 -10  701.30   21.84
   4  -1 -10  695.86   22.38
  -4  -1  10  711.35   16.20
  -4  -1  10  746.97   18.64
   4   1  -9 2114.72   65.87
   4  -1  -9 1972.12   70.56
  -4  -1   9 1984.65   52.60
  -4  -1   9 2141.70   54.60
   4   1  -8 1466.02   40.62
   4   1  -8 1540.82   40.53
   4  -1  -8 1549.97   46.49
  -4  -1   8 1479.43   35.87
  -4  -1   8 1511.33   34.70
   4   1  -7    5.46    5.33
   4   1  -7    2.41    3.20
   4  -1  -7    7.93    7.36
  -4  -1   7    5.49    2.60
  -4  -1   7   13.01    3.53
   4   1  -6   37.01    6.63
   4   1  -6   45.60    5.86
   4  -1  -6   49.70    5.81
  -4  -1   6   47.46    3.30
  -4  -1   6   44.08    2.60
   4   1  -5   33.11    4.15
   4   1  -5   38.30    4.94
  -4   1   5   28.63    6.40
   4  -1  -5   38.39    5.28
  -4  -1   5   35.39    2.43
  -4  -1   5   36.18    3.34
   4   1  -4    6.81    5.97
   4   1  -4   23.04    2.98
  -4   1   4   25.32    6.79
   4  -1  -4   30.30    4.88
  -4  -1   4   19.35    3.29
  -4  -1   4   24.38    3.26
   4   1  -3  151.29    6.38
   4   1  -3  145.56    6.67
  -4   1   3  147.77    6.62
   4  -1  -3  146.28   10.94
  -4  -1   3  158.93    5.12
  -4  -1   3  147.48    5.52
   4   1  -2 2179.47   67.02
   4   1  -2 2119.15   56.49
  -4   1   2 2106.16   66.67
   4  -1  -2 2062.39   67.22
  -4  -1   2 2063.12   47.97
  -4  -1   2 2194.31   58.22
   4   1  -117831.32 1249.89
   4   1  -117915.88 1216.26
  -4   1   117144.15 1235.70
   4  -1  -117988.46 1299.03
  -4  -1   116987.24 1111.76
  -4  -1   116727.26 1158.86
   4   1   0  637.90   16.12
  -4   1   0  606.68   20.17
   4   1   0  618.11   13.62
  -4  -1   0  607.65   14.09
  -4  -1   0  615.89   12.12
   4  -1   0  649.65   20.68
   4   1   1   23.45    6.74
  -4   1  -1   25.93    4.36
   4   1   1   22.65    3.05
  -4  -1  -1   25.04    3.42
  -4  -1  -1   21.03    2.92
   4  -1   1   16.03    4.08
   4   1   2  678.00   19.96
   4   1   2  675.17   13.73
  -4   1  -2  711.11   18.53
   4  -1   2  692.06   17.73
  -4  -1  -2  671.75   17.74
  -4  -1  -2  707.16   15.21
   4   1   3    6.76    3.41
  -4   1  -3    0.31    3.72
  -4  -1  -3   -1.15    2.78
   4  -1   3    0.47    3.33
  -4  -1  -3   -1.19    3.59
   4   1   4  744.76   18.03
  -4   1  -4  741.39   24.04
  -4  -1  -4  783.24   19.49
   4  -1   4  723.43   17.80
  -4  -1  -4  724.71   17.61
   4   1   5   43.89    4.01
  -4   1  -5   46.60    4.89
  -4  -1  -5   41.04    3.08
   4  -1   5   39.55    4.04
  -4  -1  -5   39.65    3.51
   4   1   6    4.94    3.37
  -4   1  -6    5.46    4.01
  -4  -1  -6    6.02    2.45
   4  -1   6    4.82    4.64
  -4  -1  -6    5.09    3.15
   4   1   7  717.71   17.37
  -4   1  -7  684.58   23.22
   4  -1   7  697.28   19.28
  -4  -1  -7  715.10   13.57
  -4  -1  -7  721.53   14.97
  -4  -1  -7  766.05   17.67
   4   1   8 1059.01   26.07
  -4   1  -8 1071.12   34.95
   4  -1   8 1166.73   30.85
  -4  -1  -8  981.53   22.48
  -4  -1  -8 1066.87   25.38
  -4  -1  -8 1069.66   29.78
   4   1   9   71.66    4.30
  -4   1  -9   79.53    6.09
   4  -1   9   81.97    4.33
  -4  -1  -9   72.55    3.05
  -4  -1  -9   74.40    3.30
  -4  -1  -9   81.94    5.15
   4   1  10  469.88   14.37
  -4   1 -10  504.68   16.03
  -4  -1 -10  473.12   12.14
   4  -1  10  502.37   12.14
  -4  -1 -10  523.93   14.28
   4   1  11    9.71    5.12
  -4   1 -11    0.33    7.57
  -4  -1 -11    5.67    2.64
   4  -1  11    8.47    5.06
   4   1  12  161.29    8.50
  -4   1 -12  153.48    8.73
  -4  -1 -12  153.98    5.38
   4  -1  12  167.73    6.08
   4   1  13  930.39   23.83
  -4   1 -13  949.49   31.32
  -4  -1 -13  915.86   25.29
   4  -1  13  944.74   26.51
   4   1  14  261.37   10.52
  -4   1 -14  281.80   13.31
  -4  -1 -14  268.70    8.58
   4  -1  14  273.38    8.76
   4   1  15  196.08    9.26
  -4   1 -15  191.45   16.88
  -4  -1 -15  184.59    7.47
   4  -1  15  207.77   10.77
   4   1  16  215.45    7.49
  -4   1 -16  258.15   19.40
  -4  -1 -16  228.21    8.75
   4  -1  16  235.38    8.75
   4   1  17  353.57   13.96
  -4   1 -17  392.07   25.19
  -4  -1 -17  368.54   16.93
   4  -1  17  390.02   12.43
   4   1  18  293.16    9.78
  -4   1 -18  319.76   24.54
  -4  -1 -18  304.70   12.02
   4  -1  18  319.71   15.36
   4   1  19   37.39    6.64
  -4   1 -19   49.99   14.97
   4  -1  19   28.34    4.62
  -4  -1 -19   26.79    6.05
   4  -1  19   36.65    6.00
   4   1  20    1.82    5.82
  -4   1 -20   -0.91   14.14
   4  -1  20    5.33    2.70
  -4  -1 -20    2.15    8.79
   4  -1  20    6.28    5.29
  -4  -1 -20   15.82    7.92
   4   1  21  248.04    9.38
  -4   1 -21  271.91   27.19
  -4  -1 -21  250.87   19.03
  -4  -1 -21  291.64   16.86
  -4   1 -22  224.77   17.65
  -4  -1 -22  178.51   12.28
  -4  -1 -22  194.61   15.60
  -4   1 -23  194.99   18.37
  -4  -1 -23  181.58   12.33
  -4  -1 -23  212.10   16.33
  -4   1 -24   76.79   14.25
  -4  -1 -24   61.06   13.97
  -4  -1 -24   52.13   12.67
  -4   1 -25    5.63   11.64
  -4  -1 -25    1.67   14.12
  -4  -1 -25   -7.42   10.12
  -4   1 -26   -1.09   12.66
  -4  -1 -26   10.86    9.58
  -4  -1 -26    1.17   16.60
  -4   1 -27  -13.43   13.24
  -4  -1 -27    3.71   10.21
  -4  -1 -27   -8.95   18.75
  -4   1 -28    6.26   14.25
  -4  -1 -28   -2.20   10.66
  -4  -1 -28   -7.41   13.02
   4   2 -28   17.01   15.07
   4  -2 -28   -1.81    9.24
   4  -2 -28  -35.28   27.97
   4   2 -27   82.25   18.97
   4  -2 -27   87.20   11.26
   4  -2 -27  119.13   35.58
   4   2 -26   -8.38   13.87
   4  -2 -26    4.32    8.09
   4  -2 -26  -20.75   22.95
   4   2 -25   -4.72   13.64
   4  -2 -25   13.84   11.51
   4  -2 -25   23.19   23.23
   4   2 -24   11.02   12.83
   4  -2 -24   12.13    7.02
   4  -2 -24    0.67   22.38
   4   2 -23   22.44   11.98
   4  -2 -23   11.60    6.80
   4  -2 -23  -13.71   20.57
  -4  -2  23    5.36    1.54
   4   2 -22   50.33   13.80
   4  -2 -22   37.84   11.89
   4  -2 -22   67.30   23.79
  -4  -2  22   64.30    7.65
   4   2 -21  181.15   16.56
   4  -2 -21  147.61   10.12
   4  -2 -21  142.55   27.95
  -4  -2  21  171.49   10.12
   4   2 -20  286.43   18.33
   4  -2 -20  243.18   16.80
   4  -2 -20  228.99   29.81
  -4  -2  20  282.93   16.43
   4   2 -19   31.96   10.98
   4  -2 -19   42.84    6.38
   4  -2 -19   38.43   18.67
  -4  -2  19   36.96    5.65
  -4  -2  19   33.35    6.11
   4   2 -18  776.73   33.38
   4  -2 -18  718.15   24.55
   4  -2 -18  863.90   54.93
  -4  -2  18  724.52   21.46
  -4  -2  18  809.40   24.15
   4   2 -17   -7.00    8.07
   4  -2 -17    0.93    1.13
   4  -2 -17    0.02    2.14
   4  -2 -17   -0.01   17.60
  -4  -2  17    4.49    5.68
  -4  -2  17    7.83    7.78
   4   2 -16  311.00   16.87
   4  -2 -16  324.45   21.18
  -4  -2  16  305.05   10.95
  -4  -2  16  318.81   11.63
   4   2 -15  440.85   19.72
   4  -2 -15  440.49   24.74
  -4  -2  15  436.07   13.91
  -4  -2  15  478.29   14.21
   4   2 -14   10.34    6.99
   4  -2 -14   30.20    9.67
  -4  -2  14    0.86    6.94
  -4  -2  14   10.86    6.93
   4   2 -13   -1.81   10.18
   4  -2 -13   18.11    9.13
  -4  -2  13    6.91    4.26
  -4  -2  13    6.78    4.03
   4   2 -12    3.44    9.44
   4  -2 -12    3.05   13.30
  -4  -2  12   -3.37    3.97
  -4  -2  12    5.02    6.06
   4   2 -11   11.69    6.07
   4  -2 -11   18.04    8.58
  -4  -2  11   11.87    4.38
  -4  -2  11   15.63    3.93
   4   2 -10  105.16    7.99
   4  -2 -10  100.27   15.59
  -4  -2  10   91.20    6.13
  -4  -2  10  109.91    7.95
   4   2  -9  435.71   20.24
  -4   2   9  419.35   15.10
   4  -2  -9  436.78   19.76
  -4  -2   9  433.06   11.45
  -4  -2   9  402.55   16.61
   4   2  -8    6.20    5.26
  -4   2   8   11.68    8.92
   4  -2  -8    5.69   10.41
  -4  -2   8    4.52    3.57
  -4  -2   8    3.68    6.61
   4   2  -7   95.03   10.54
  -4   2   7   94.07   11.30
   4  -2  -7  100.21    9.39
  -4  -2   7  100.23    7.30
  -4  -2   7   96.49    8.92
   4   2  -6  823.55   28.82
  -4   2   6  795.30   30.67
   4  -2  -6  839.87   28.02
  -4  -2   6  780.87   19.95
  -4  -2   6  815.22   27.49
   4   2  -5  112.68    6.80
  -4   2   5  100.28    8.14
   4  -2  -5  102.34   13.53
  -4  -2   5  109.02    5.38
  -4  -2   5  111.20    9.57
   4   2  -4    4.67    6.82
  -4   2   4    7.06    8.50
   4  -2  -4    0.07    9.18
  -4  -2   4    0.51    3.57
  -4  -2   4    9.26    4.35
   4   2  -3   14.62    7.28
  -4   2   3   29.44    9.10
   4  -2  -3   19.19    9.85
  -4  -2   3   22.99    5.92
  -4  -2   3   24.35    4.88
   4   2  -2   78.36    5.71
  -4   2   2   76.10   11.37
   4  -2  -2   70.51    8.02
  -4  -2   2   81.78    5.22
  -4  -2   2   73.94    6.10
   4   2  -1  425.49   15.09
   4   2  -1  431.96   13.87
  -4   2   1  434.74   15.97
   4  -2  -1  452.32   17.12
  -4  -2   1  465.77   16.13
  -4  -2   1  450.70   14.62
   4   2   0   37.04    6.45
  -4   2   0   44.47    6.40
   4   2   0   36.18    7.08
  -4  -2   0   52.48    8.42
  -4  -2   0   39.95    4.83
   4  -2   0   45.99    6.86
   4   2   1   -5.35    5.11
  -4   2  -1    6.35    8.19
   4   2   1   -1.24    5.77
  -4  -2  -1    9.52    4.29
  -4  -2  -1   -6.26    6.01
   4  -2   1   -2.52    8.07
   4   2   2   38.03    6.21
  -4   2  -2   29.47   10.12
   4   2   2   31.54    7.18
  -4  -2  -2   36.26    5.25
  -4  -2  -2   47.44    7.34
   4  -2   2   42.90    6.44
   4   2   3  370.96   17.55
   4   2   3  325.92   10.75
  -4   2  -3  330.83   14.20
   4  -2   3  355.78   13.41
  -4  -2  -3  371.85   15.69
  -4  -2  -3  350.81   11.63
   4   2   4  151.57   11.55
   4   2   4  125.93    9.03
  -4   2  -4  131.67    9.27
   4  -2   4  151.73   12.63
  -4  -2  -4  139.18    6.57
  -4  -2  -4  158.28   10.26
   4   2   5  527.12   21.81
   4   2   5  546.64   15.64
  -4   2  -5  515.77   19.21
   4  -2   5  533.19   22.04
  -4  -2  -5  542.51   15.56
  -4  -2  -5  549.27   17.00
   4   2   6 2059.76   68.08
   4   2   6 2151.09   69.54
  -4   2  -6 2033.78   72.21
   4  -2   6 2047.79   73.74
  -4  -2  -6 2060.45   65.63
  -4  -2  -6 2129.03   68.86
   4   2   7  224.15    9.68
  -4   2  -7  237.84   16.16
  -4  -2  -7  219.85    8.21
   4  -2   7  219.12   13.58
  -4  -2  -7  236.61   10.25
   4   2   8  228.45   12.88
  -4   2  -8  229.35   12.03
  -4  -2  -8  211.84    9.56
   4  -2   8  267.14   14.25
  -4  -2  -8  220.02   10.52
   4   2   9   12.20    7.00
  -4   2  -9    3.34    6.35
  -4  -2  -9   -0.90    3.13
   4  -2   9    1.36    4.70
  -4  -2  -9    7.93    8.66
   4   2  10    8.34    7.69
  -4   2 -10    7.94    6.88
  -4  -2 -10   16.88    5.03
   4  -2  10   16.29    5.05
  -4  -2 -10    9.50    6.12
   4   2  11  250.98   13.73
  -4   2 -11  219.46   13.08
  -4  -2 -11  245.18    9.75
   4  -2  11  245.05   10.11
  -4  -2 -11  245.59   17.77
   4   2  12    4.24    4.90
  -4   2 -12    5.70    7.19
  -4  -2 -12    6.15    2.95
   4  -2  12    4.31    7.94
  -4  -2 -12    8.59    6.93
   4   2  13  729.58   23.76
  -4   2 -13  770.42   38.07
  -4  -2 -13  742.88   20.79
   4  -2  13  782.62   23.49
  -4  -2 -13  788.49   30.82
  -4   2 -14    0.51   11.79
   4  -2  14    4.70    6.87
  -4  -2 -14    1.92    3.79
  -4  -2 -14   -2.21    4.39
  -4  -2 -14   -6.33   11.72
  -4   2 -15   18.83    8.18
   4  -2  15    3.45    5.01
  -4  -2 -15   11.64    6.31
  -4  -2 -15    7.44    2.80
  -4  -2 -15    5.72   12.08
  -4   2 -16  103.55   12.10
  -4  -2 -16   94.64    6.22
   4  -2  16   94.72   10.40
  -4  -2 -16   99.15   16.93
  -4   2 -17   55.80   11.34
  -4  -2 -17   58.62    8.23
   4  -2  17   52.96    6.51
  -4  -2 -17   47.08   10.34
  -4   2 -18  494.61   26.80
  -4  -2 -18  525.91   17.20
   4  -2  18  544.00   22.06
  -4  -2 -18  496.45   25.27
  -4   2 -19   38.65   17.85
  -4  -2 -19   26.73    5.37
   4  -2  19   16.91    5.94
  -4  -2 -19   37.07   10.34
  -4   2 -20   26.66   18.66
  -4  -2 -20   19.90    8.99
   4  -2  20   31.55    6.35
  -4  -2 -20   36.77   10.75
  -4   2 -21    2.64   17.81
  -4  -2 -21    6.34    5.88
   4  -2  21   13.72    5.95
  -4  -2 -21   11.52   10.46
  -4   2 -22  165.54   28.56
  -4  -2 -22  157.34   10.74
   4  -2  22  163.68   10.33
  -4  -2 -22  160.17   16.81
  -4   2 -23   12.45   20.79
  -4  -2 -23   -0.45   10.11
   4  -2  23   12.56   10.21
  -4  -2 -23   21.92   11.17
  -4   2 -24   17.68   21.28
   4  -2  24    3.24    3.15
  -4  -2 -24   -0.06    7.43
   4  -2  24    4.53    7.12
  -4  -2 -24   16.14   11.46
  -4   2 -25   53.28   23.46
  -4  -2 -25    9.72    8.54
   4  -2  25   13.55    7.59
  -4  -2 -25   21.46   13.18
  -4   2 -26   92.29   26.53
  -4  -2 -26   33.06    9.78
  -4  -2 -26   36.07   15.08
  -4   2 -27   18.23   17.10
  -4  -2 -27   15.97   16.04
  -4  -2 -27   44.63   22.08
   4   3 -26  -10.71   16.21
   4  -3 -26   -2.99   12.83
   4  -3 -26   19.98   18.31
  -4  -3  26   -3.74    8.29
   4   3 -25   96.36   20.71
   4  -3 -25   64.24   10.64
   4  -3 -25   71.88   23.06
  -4  -3  25   91.59   10.44
   4   3 -24   30.54   16.19
   4  -3 -24   24.20    8.47
   4  -3 -24   27.17   18.47
  -4  -3  24   30.78   12.62
   4   3 -23    3.54   14.88
   4  -3 -23   26.68   11.55
   4  -3 -23   17.21   16.68
  -4  -3  23    5.49    8.24
  -4  -3  23   14.19    7.08
   4   3 -22   42.36   14.22
   4  -3 -22   22.46    7.19
   4  -3 -22    5.20   16.15
  -4  -3  22    6.88    9.00
  -4  -3  22   18.15    6.98
   4   3 -21    7.27   12.34
   4  -3 -21    7.98   14.58
  -4  -3  21    1.73    6.40
  -4  -3  21   12.51    9.95
   4   3 -20   33.43   13.50
   4  -3 -20   23.21    3.21
   4  -3 -20   19.26   22.75
  -4  -3  20   36.33   10.72
  -4  -3  20   34.59    6.69
   4   3 -19  149.48   17.17
   4  -3 -19  134.76    5.93
   4  -3 -19  161.91   29.62
  -4  -3  19  150.92   15.97
  -4  -3  19  149.29    9.34
   4   3 -18   33.97   12.37
   4  -3 -18   36.36    7.31
   4  -3 -18   30.47   22.91
  -4  -3  18   44.32    7.91
  -4  -3  18   39.94    6.91
   4   3 -17  514.53   28.46
   4  -3 -17  479.66   31.77
  -4  -3  17  511.48   26.94
  -4  -3  17  524.20   18.08
   4   3 -16   87.16   19.80
   4  -3 -16   82.41   16.82
  -4  -3  16  101.05   13.53
  -4  -3  16   97.04   12.06
   4   3 -15   41.20   17.36
   4  -3 -15   37.66   14.31
  -4  -3  15   35.34    7.82
  -4  -3  15   52.29    6.74
   4   3 -14   17.46    9.78
   4  -3 -14    3.56   19.06
  -4  -3  14    9.90    6.76
  -4  -3  14   15.30    8.41
   4   3 -13   47.90   11.10
   4  -3 -13   60.38   14.54
  -4  -3  13   50.93   11.99
  -4  -3  13   64.37    7.00
   4   3 -12  212.02   14.79
   4  -3 -12  229.74   19.21
  -4  -3  12  219.63   16.45
  -4  -3  12  215.57   13.69
   4   3 -11    9.71    8.39
  -4   3  11   10.70    7.98
   4  -3 -11   12.01   15.92
  -4  -3  11    2.34    5.35
  -4  -3  11   23.09    9.83
   4   3 -10   58.55    9.58
  -4   3  10   58.03    9.68
   4  -3 -10   61.76   11.55
  -4  -3  10   67.48   10.37
  -4  -3  10   70.16   11.41
   4   3  -9  127.91   16.23
  -4   3   9  103.15   18.16
   4  -3  -9  126.30   13.23
  -4  -3   9  127.38    8.10
  -4  -3   9  130.72    9.56
   4   3  -8    4.78    6.96
  -4   3   8   -3.64    7.34
   4  -3  -8   -4.23    8.80
  -4  -3   8   -3.83    5.11
  -4  -3   8    3.35    6.08
   4   3  -7  731.75   29.70
  -4   3   7  697.15   28.68
   4  -3  -7  712.18   39.36
  -4  -3   7  808.62   31.13
  -4  -3   7  730.62   25.74
   4   3  -6  184.66   16.73
  -4   3   6  176.28   12.46
   4  -3  -6  170.07   13.43
  -4  -3   6  173.58   12.91
  -4  -3   6  163.62   10.62
   4   3  -5  260.73   13.15
  -4   3   5  257.85   22.50
   4  -3  -5  252.76   15.03
  -4  -3   5  261.45   11.44
  -4  -3   5  256.50   12.52
   4   3  -4  402.57   17.98
  -4   3   4  442.57   27.38
   4  -3  -4  432.69   28.78
  -4  -3   4  450.44   16.32
  -4  -3   4  434.28   22.53
   4   3  -3  192.30   11.71
  -4   3   3  176.34   13.38
   4  -3  -3  207.88   14.59
  -4  -3   3  205.36   10.35
  -4  -3   3  218.27   16.00
   4   3  -2   21.51    6.82
  -4   3   2   26.44    8.31
   4  -3  -2   46.19    8.25
  -4  -3   2   32.61    6.43
  -4  -3   2   26.44   10.09
  -4   3   1  275.74   15.14
   4   3  -1  280.46   13.77
  -4  -3   1  290.94   13.01
  -4  -3   1  284.85   12.94
   4  -3  -1  282.48   15.92
  -4   3   0   38.67    8.51
   4   3   0   37.99   10.35
  -4  -3   0   38.61    6.86
  -4  -3   0   44.67    6.66
   4  -3   0   33.33    8.62
  -4   3  -1   -3.92    7.07
   4   3   1   10.11    8.75
  -4  -3  -1    1.23    5.98
  -4  -3  -1    8.48    5.47
   4  -3   1    3.15    6.82
  -4   3  -2   21.44    8.36
   4   3   2   19.71    6.48
  -4  -3  -2   29.89   10.16
  -4  -3  -2   38.84    6.52
   4  -3   2   30.90    8.08
  -4   3  -3   25.80   13.15
   4   3   3   36.92    6.64
  -4  -3  -3   32.21    6.35
  -4  -3  -3   32.76   10.58
   4  -3   3   33.13    8.01
  -4   3  -4  -18.50   12.68
   4   3   4   10.75    5.96
  -4  -3  -4   11.59    5.49
  -4  -3  -4    6.53    9.91
   4  -3   4    4.62   10.69
   4   3   5  116.29    8.82
  -4   3  -5  105.16   11.10
   4  -3   5  106.78   13.82
  -4  -3  -5  107.36    8.18
  -4  -3  -5  116.76   13.94
   4   3   6   17.12    6.34
  -4   3  -6   24.11    8.17
   4  -3   6   32.93   11.30
  -4  -3  -6   11.98    8.51
  -4  -3  -6   11.74    6.83
   4   3   7   10.77    6.25
  -4   3  -7   18.89   12.78
   4  -3   7   19.80    7.06
  -4  -3  -7   18.26    5.57
  -4  -3  -7    8.63    7.05
   4   3   8   37.30    6.64
  -4   3  -8   39.96    9.56
   4  -3   8   32.25    7.64
  -4  -3  -8   43.96    9.08
  -4  -3  -8   32.95    7.96
   4   3   9    6.37    5.54
  -4   3  -9    0.48   12.82
   4  -3   9    4.43    6.61
  -4  -3  -9    1.36    4.75
  -4  -3  -9   16.11   11.21
  -4   3 -10   11.26    8.91
  -4  -3 -10    9.92    7.63
   4  -3  10   11.63   10.79
  -4  -3 -10    2.27    7.98
  -4   3 -11   19.44   14.73
  -4  -3 -11   16.40    4.85
   4  -3  11   15.87    7.10
  -4  -3 -11   11.09   13.28
  -4   3 -12  101.17   12.92
  -4  -3 -12  106.59    9.78
   4  -3  12   86.91    9.12
  -4  -3 -12   96.47   11.85
  -4   3 -13    1.65   10.15
  -4  -3 -13   12.76    4.32
   4  -3  13   20.49    7.19
  -4  -3 -13   10.27    9.38
  -4   3 -14    3.25   15.87
  -4  -3 -14   -0.35    5.90
   4  -3  14    6.18    6.36
  -4  -3 -14  -12.82   13.51
  -4   3 -15   19.43   10.74
  -4  -3 -15   12.59    4.21
   4  -3  15    7.13   11.44
  -4  -3 -15   19.20    9.66
  -4   3 -16    1.38   11.36
  -4  -3 -16    6.47    3.66
   4  -3  16   16.07    6.42
  -4  -3 -16    1.37    9.93
  -4   3 -17   34.70   13.32
  -4  -3 -17   31.14    5.95
   4  -3  17   36.83   11.70
  -4  -3 -17   35.41   11.91
  -4   3 -18   16.68   12.94
   4  -3  18   10.78    6.86
  -4  -3 -18    8.04    5.46
  -4  -3 -18    6.12    5.23
  -4  -3 -18   22.90   17.42
  -4   3 -19   12.36   20.34
   4  -3  19   10.44   10.98
  -4  -3 -19   25.37    8.65
  -4  -3 -19    5.46    3.19
  -4  -3 -19   -8.68   17.40
  -4   3 -20   -6.71   20.44
  -4  -3 -20    1.80    5.53
   4  -3  20    0.78    6.55
  -4  -3 -20   13.81   17.36
  -4   3 -21   -0.74   21.47
  -4  -3 -21   11.27    6.17
   4  -3  21   11.43    7.25
  -4  -3 -21   29.87   12.44
  -4   3 -22   14.15   21.17
  -4  -3 -22   -1.77   10.07
   4  -3  22    5.22    6.63
  -4  -3 -22   -4.31   12.57
  -4   3 -23  108.06   19.92
  -4  -3 -23  106.01   10.10
   4  -3  23  119.26   10.87
  -4  -3 -23  125.11   18.29
  -4   3 -24   -2.63   15.64
  -4  -3 -24  -11.74   10.90
   4  -3  24  -10.98   11.61
  -4  -3 -24   18.14   14.20
  -4   3 -25   12.87   16.20
  -4  -3 -25    2.04    7.74
   4  -3  25    6.41    7.74
  -4  -3 -25  -15.06   14.60
  -4   3 -26   42.71   17.58
  -4  -3 -26   -0.70    8.49
   4  -3  26    5.86    8.49
  -4  -3 -26    5.71   15.62
   4   4 -24   93.54   33.19
   4  -4 -24   60.07   10.52
   4  -4 -24  104.73   23.25
  -4  -4  24   39.94   11.38
  -4  -4  24   58.24   15.15
   4   4 -23   39.95   26.42
   4  -4 -23  -15.40   18.60
  -4  -4  23   22.52   14.97
  -4  -4  23    6.21    8.07
   4   4 -22   43.65   19.02
   4  -4 -22   53.57   21.02
  -4  -4  22   31.78   18.35
  -4  -4  22   37.89    8.58
   4   4 -21   26.03   18.12
   4  -4 -21   30.29   19.59
  -4  -4  21   53.44   12.23
  -4  -4  21   53.07    8.76
   4   4 -20   31.80   14.56
   4  -4 -20    3.40    5.30
   4  -4 -20   13.00   16.48
  -4  -4  20    3.94   14.58
  -4  -4  20   -1.77    7.06
   4   4 -19  -11.48   13.86
   4  -4 -19    0.95    9.04
   4  -4 -19   14.81   23.36
  -4  -4  19    1.13   15.19
  -4  -4  19   13.19   10.03
   4   4 -18  150.35   19.73
   4  -4 -18  153.84   35.10
  -4  -4  18  126.66   14.73
  -4  -4  18  158.42   11.31
   4   4 -17   43.49   14.46
   4  -4 -17   34.31   16.79
  -4  -4  17   47.45   10.56
  -4  -4  17   28.30    7.79
   4   4 -16  204.74   28.78
   4  -4 -16  149.67   23.23
  -4  -4  16  197.72   21.64
  -4  -4  16  195.72   12.31
   4   4 -15   47.00   14.29
   4  -4 -15   26.03   16.34
  -4  -4  15   55.20   16.60
  -4  -4  15   59.46    8.28
   4   4 -14   25.79   13.39
   4  -4 -14   17.12   22.92
  -4  -4  14   39.17    9.85
  -4  -4  14   25.85    8.30
   4   4 -13  238.79   20.39
  -4   4  13  223.34   17.63
   4  -4 -13  230.68   24.33
  -4  -4  13  236.84   13.87
  -4  -4  13  259.88   16.81
   4   4 -12  574.11   43.42
  -4   4  12  519.92   29.18
   4  -4 -12  543.82   35.36
  -4  -4  12  597.45   25.35
  -4  -4  12  589.84   27.69
   4   4 -11   32.35   12.53
  -4   4  11   20.94   11.66
   4  -4 -11   54.02   21.91
  -4  -4  11   34.41    7.95
  -4  -4  11   38.21    9.75
   4   4 -10  506.76   38.51
  -4   4  10  525.28   28.65
   4  -4 -10  526.62   31.18
  -4  -4  10  556.27   24.01
  -4  -4  10  533.81   24.33
   4   4  -9   57.84   11.64
  -4   4   9   24.39   18.68
   4  -4  -9   56.23   14.18
  -4  -4   9   53.75   12.60
  -4  -4   9   59.92    9.61
   4   4  -8   -3.87   14.12
  -4   4   8    4.08   10.25
   4  -4  -8   18.18   11.31
  -4  -4   8    3.29    7.13
  -4  -4   8    0.68    7.77
   4   4  -7   72.50   12.22
  -4   4   7   79.29   13.98
   4  -4  -7   74.41   14.40
  -4  -4   7  103.28   14.66
  -4  -4   7   87.32   10.58
   4   4  -6   -5.93   13.69
  -4   4   6   -1.02   15.54
   4  -4  -6  -12.76   11.04
  -4  -4   6   -0.68    7.05
  -4  -4   6   -0.87    7.45
   4   4  -5   80.90   11.87
  -4   4   5   78.18   13.06
   4  -4  -5   88.24   13.40
  -4  -4   5   84.38    9.76
  -4  -4   5   85.15    9.94
   4   4  -4    5.69    8.92
  -4   4   4   18.75   10.25
   4  -4  -4    9.36   10.15
  -4  -4   4    2.24    7.59
  -4  -4   4   12.11    7.91
  -4   4   3  -15.85   15.70
   4   4  -3   -4.36   13.40
  -4  -4   3   11.44    7.52
  -4  -4   3   14.84   11.49
   4  -4  -3   24.73   17.43
  -4   4   2   98.74   12.76
   4   4  -2   65.14   17.83
  -4  -4   2   83.42    9.99
  -4  -4   2   91.93   10.10
   4  -4  -2   86.03   12.77
  -4   4   1   61.78   12.31
   4   4  -1   71.69   10.46
  -4  -4   1   72.87    9.87
  -4  -4   1   77.40    9.85
   4  -4  -1   62.79   12.34
   4   4   0   45.92    9.60
  -4  -4   0   49.40    9.28
  -4  -4   0   51.94    9.54
   4   4   1   75.60   10.67
  -4   4  -1  112.99   13.70
  -4  -4  -1   91.15   15.62
   4   4   2  601.73   27.26
  -4   4  -2  599.98   31.70
   4  -4   2  662.88   30.99
  -4  -4  -2  598.24   24.59
   4  -4   3  508.92   26.10
  -4  -4  -3  507.49   22.47
  -4  -4  -3  515.06   25.29
  -4   4  -4  320.83   22.72
   4   4   4  305.58   24.38
   4  -4   4  276.17   29.11
   4  -4   5   66.91   12.69
  -4  -4  -5   70.72   14.55
  -4   4  -6 1883.24   89.53
   4   4   6 1894.81   79.84
  -4  -4  -6 1875.54   73.15
  -4  -4  -6 1956.87   88.58
   4  -4   6 2034.09   83.97
   4   4   7  350.84   19.13
  -4   4  -7  313.16   24.94
   4  -4   7  395.47   31.55
  -4  -4  -7  347.77   17.36
  -4  -4  -7  365.81   21.82
   4   4   8  217.39   14.66
  -4   4  -8  232.01   28.22
   4  -4   8  237.43   17.29
  -4  -4  -8  215.57   19.34
  -4  -4  -8  203.08   24.05
   4   4   9    7.30   13.13
  -4   4  -9   -3.04   10.76
   4  -4   9    8.07    8.59
  -4  -4  -9    4.74    6.53
  -4  -4  -9  -10.09    9.22
   4   4  10   27.84    9.06
  -4   4 -10   13.91   12.97
   4  -4  10   39.63   14.84
  -4  -4 -10   31.05    7.66
  -4  -4 -10   34.84   15.73
   4   4  11    0.95    7.44
  -4   4 -11    8.11   17.80
   4  -4  11   -5.84    8.56
  -4  -4 -11   13.26    9.52
  -4  -4 -11   10.95    9.48
  -4   4 -12   25.71   12.09
  -4  -4 -12    8.02    6.75
   4  -4  12   16.50    9.09
  -4  -4 -12   13.59   15.69
  -4   4 -13   55.91   14.94
  -4  -4 -13   46.00   11.32
   4  -4  13   52.35   10.63
  -4  -4 -13   40.12   12.43
  -4   4 -14   47.90   20.45
  -4  -4 -14   11.35    6.06
   4  -4  14    5.34    8.85
  -4  -4 -14   23.77   11.35
  -4   4 -15   21.14   14.11
  -4  -4 -15   12.59    9.41
   4  -4  15   20.42   14.22
  -4  -4 -15   -5.85   17.89
  -4   4 -16  189.86   24.37
  -4  -4 -16  215.24   10.50
   4  -4  16  219.70   15.79
  -4  -4 -16  189.70   20.45
  -4   4 -17  290.41   28.71
  -4  -4 -17  302.26   16.97
   4  -4  17  311.62   26.64
  -4  -4 -17  287.36   25.63
   4  -4  18  132.76   12.11
  -4  -4 -18  115.23    8.06
  -4  -4 -18  118.35   19.18
  -4   4 -19   65.54   28.01
  -4  -4 -19   53.22    5.77
   4  -4  19   56.85   10.90
  -4  -4 -19   80.44   25.16
  -4   4 -20   -6.24   15.64
  -4  -4 -20    0.57    6.22
   4  -4  20   -9.99    8.07
  -4  -4 -20   -0.97   20.93
  -4   4 -21   53.93   20.49
   4  -4  21   59.61   10.49
  -4  -4 -21   59.39    8.56
  -4  -4 -21   41.37    7.54
  -4  -4 -21   56.25   25.43
  -4   4 -22   11.98   18.86
  -4  -4 -22   20.16   11.33
   4  -4  22   11.52    8.77
  -4  -4 -22    9.46   15.65
  -4   4 -23   59.62   22.18
  -4  -4 -23   45.51    9.20
   4  -4  23   65.16   10.51
  -4  -4 -23   68.23   19.07
  -4   4 -24    7.14   19.46
  -4  -4 -24   11.89    7.93
   4  -4  24   12.09   14.13
  -4  -4 -24    7.96   16.79
   4   5 -22  -23.70   29.24
   4  -5 -22   24.23   22.01
  -4  -5  22   12.43   13.82
  -4  -5  22    2.11    8.92
   4  -5 -21  171.15   31.38
  -4  -5  21  176.37   32.37
  -4  -5  21  167.41   20.54
   4   5 -20   46.34   33.79
   4  -5 -20   66.61   24.34
  -4  -5  20   45.56   15.74
  -4  -5  20   63.80   10.96
   4   5 -19   -6.18   17.28
   4  -5 -19    4.88   13.33
   4  -5 -19   -9.34   18.35
  -4  -5  19    9.85   12.72
  -4  -5  19  -11.42    8.50
   4   5 -18   40.83   18.62
   4  -5 -18   28.15   10.54
   4  -5 -18   38.93   21.03
  -4  -5  18   29.00   13.99
  -4  -5  18   35.29   10.21
   4   5 -17   59.60   18.64
   4  -5 -17   -6.84   31.20
  -4  -5  17   34.34   21.65
  -4  -5  17   37.61    9.76
   4   5 -16   28.15   23.90
   4  -5 -16  -24.05   18.44
  -4  -5  16   18.15   18.95
  -4  -5  16   10.96   14.50
   4   5 -15   23.59   22.73
  -4   5  15   -4.09   11.50
   4  -5 -15   23.71   17.50
  -4  -5  15    3.04    8.85
  -4  -5  15    9.77   12.12
   4   5 -14   18.74   15.94
  -4   5  14   33.59   12.34
   4  -5 -14   17.84   18.62
  -4  -5  14   43.76   14.49
  -4  -5  14   35.18   13.27
   4   5 -13   -6.72   13.80
  -4   5  13    9.86   12.02
   4  -5 -13    8.05   24.08
  -4  -5  13    3.85    8.88
  -4  -5  13   13.78   11.54
   4   5 -12   86.59   25.54
  -4   5  12   85.42   14.73
   4  -5 -12   79.77   19.39
  -4  -5  12   69.97   17.12
  -4  -5  12   81.88   14.28
   4   5 -11   21.31   15.07
  -4   5  11   40.65   13.67
   4  -5 -11   26.48   16.71
  -4  -5  11   39.55   10.71
  -4  -5  11   40.98   12.24
   4   5 -10   38.52   14.70
  -4   5  10   16.24   13.57
   4  -5 -10   58.32   24.87
  -4  -5  10   39.61   15.48
  -4  -5  10   42.81   11.93
   4   5  -9  165.39   28.41
  -4   5   9  151.57   18.80
   4  -5  -9  160.88   22.69
  -4  -5   9  141.46   14.88
  -4  -5   9  182.03   15.86
   4   5  -8    6.40   12.70
  -4   5   8  -49.83   19.94
   4  -5  -8  -34.49   15.67
  -4  -5   8  -36.25   15.97
  -4  -5   8   -5.27   15.84
   4   5  -7   92.44   25.05
  -4   5   7  123.10   16.58
   4  -5  -7   95.90   19.98
  -4  -5   7  110.67   13.74
  -4  -5   7  114.85   21.31
   4   5  -6  170.35   18.68
  -4   5   6  210.59   28.66
   4  -5  -6  151.85   21.63
  -4  -5   6  169.90   23.12
  -4  -5   6  144.35   22.19
   4   5  -5  -23.21   18.38
   4  -5  -5   13.71   12.87
  -4  -5   5    0.46   10.00
  -4  -5   5  -22.18   10.11
   4   5  -4    9.51   11.36
   4  -5  -4    8.93   13.50
  -4  -5   4   -4.88   10.21
  -4  -5   4   35.46   11.45
  -4   5   3  208.01   19.88
  -4  -5   3  187.01   16.58
  -4   5   2  727.04   40.43
   4   5  -2  620.95   51.89
  -4  -5   2  589.59   30.47
  -4  -5   2  585.97   33.26
   4  -5  -2  737.52   41.95
   4   5  -1  239.12   20.19
   4  -5  -1  267.90   22.70
  -4  -5   1  251.58   18.70
  -4  -5   1  269.84   20.20
  -4   5   0   -8.50   12.07
  -4  -5   0    3.67    9.22
   4   5   1  443.87   38.32
  -4   5  -1  462.01   42.74
  -4   5  -2  426.61   31.92
  -4  -5  -2  444.40   39.24
   4  -5   2  497.03   42.61
   4   5   3   53.34   12.47
  -4   5  -3  142.30   26.74
  -4  -5  -3   45.58   16.83
  -4   5  -4  -10.43   13.70
   4   5   4   47.51   17.10
  -4  -5  -4    8.59    9.32
  -4  -5  -4   34.07   12.30
   4  -5   4   17.50   13.78
  -4   5  -5   73.29   26.83
   4   5   5  105.94   13.56
  -4  -5  -5  106.24   12.62
  -4  -5  -5  106.86   15.92
   4  -5   5  102.29   16.57
   4   5   6   74.75   13.31
  -4   5  -6   38.60   17.04
  -4  -5  -6   59.94   11.20
  -4   5  -7  654.83   59.98
   4   5   7  697.23   46.21
  -4  -5  -7  751.52   42.25
  -4  -5  -7  748.03   55.71
   4  -5   7  782.39   55.56
  -4   5  -8   43.90   17.32
   4   5   8   46.16   12.89
  -4  -5  -8   20.31    9.93
  -4  -5  -8   21.89   13.65
   4  -5   8   50.38   14.14
  -4   5  -9   40.27   26.45
   4   5   9   92.81   12.26
  -4  -5  -9   66.56   11.55
  -4  -5  -9   69.25   22.97
   4  -5   9   58.18   20.70
   4   5  10   18.14   17.19
  -4   5 -10   40.92   15.88
   4  -5  10   31.61   12.50
  -4  -5 -10   21.14   14.01
  -4  -5 -10   26.20   13.29
   4   5  11    5.25    9.80
  -4   5 -11    3.13   14.92
   4  -5  11   -3.47   11.24
  -4  -5 -11   12.96    8.78
  -4  -5 -11   -4.74   12.49
   4   5  12   23.40   14.88
  -4   5 -12   28.19   24.80
   4  -5  12   22.44   11.72
  -4  -5 -12   13.16    9.21
  -4  -5 -12   17.26   20.45
   4   5  13   42.68   11.45
  -4   5 -13   33.36   18.65
   4  -5  13   53.44   12.89
  -4  -5 -13   64.25   14.29
  -4  -5 -13   50.27   15.46
  -4   5 -14  197.99   27.15
  -4  -5 -14  250.48   15.15
   4  -5  14  208.23   20.44
  -4  -5 -14  228.02   23.46
  -4   5 -15    7.73   18.58
  -4  -5 -15   38.01   12.72
   4  -5  15   47.30   11.53
  -4  -5 -15   27.14   23.84
  -4   5 -16  194.87   40.63
  -4  -5 -16  199.93   13.79
   4  -5  16  196.82   19.41
  -4  -5 -16  186.50   24.15
  -4   5 -17   11.46   18.66
  -4  -5 -17   31.71   12.56
   4  -5  17   33.70   11.52
  -4  -5 -17    5.99   16.41
  -4   5 -18  -10.86   18.22
  -4  -5 -18    1.94    6.73
   4  -5  18   15.04   10.52
  -4  -5 -18   12.54   15.53
  -4   5 -19   -6.23   17.98
  -4  -5 -19   10.47    9.78
   4  -5  19   -5.58   15.23
  -4  -5 -19    1.76   23.92
  -4   5 -20   36.96   21.86
  -4  -5 -20   33.88    7.53
   4  -5  20   51.43   11.77
  -4  -5 -20   44.58   28.33
  -4   5 -21   18.01   31.72
  -4  -5 -21    6.24    5.72
   4  -5  21   41.98   16.69
  -4  -5 -21    2.14   17.34
   4   6 -18   14.04   30.99
   4  -6 -18   14.46   19.07
  -4  -6  18    3.07   10.39
   4   6 -17   15.78   20.97
   4  -6 -17   26.79   13.61
   4  -6 -17   23.22   23.82
  -4  -6  17    4.16   25.88
  -4  -6  17   26.28   19.59
   4   6 -16    7.75   18.75
  -4   6  16   -9.19   13.13
   4  -6 -16  -19.89   20.93
  -4  -6  16    6.51   10.70
  -4  -6  16   26.26   24.56
   4   6 -15    0.52   18.13
  -4   6  15    9.42   13.00
   4  -6 -15  -36.83   29.80
  -4  -6  15   16.89   15.76
  -4  -6  15   -2.35   22.99
   4   6 -14    8.27   27.68
  -4   6  14  -12.83   22.11
   4  -6 -14   19.93   20.83
  -4  -6  14   10.75   11.11
  -4  -6  14    5.84   14.81
   4   6 -13   10.76   17.05
  -4   6  13    8.30   13.55
   4  -6 -13   23.16   18.57
  -4  -6  13   -7.98   10.72
  -4  -6  13   13.83   14.10
   4   6 -12   -0.28   16.55
  -4   6  12  -28.80   22.59
   4  -6 -12   13.93   18.60
  -4  -6  12  -10.57   11.91
  -4  -6  12   -3.65   13.64
   4   6 -11  373.24   48.73
  -4   6  11  322.97   29.62
   4  -6 -11  384.07   53.13
  -4  -6  11  346.53   26.44
  -4  -6  11  419.68   29.79
   4   6 -10   22.45   18.91
  -4   6  10   24.09   24.38
   4  -6 -10   27.92   21.38
  -4  -6  10   29.47   13.97
  -4  -6  10   50.88   14.95
   4   6  -9   99.14   22.14
  -4   6   9  118.80   19.74
   4  -6  -9   65.43   24.05
  -4  -6   9   89.48   17.32
  -4  -6   9  131.02   17.83
  -4   6   8    4.99   21.44
   4   6  -8  -20.64   23.78
  -4  -6   8   13.38   12.71
  -4  -6   8   10.60   18.64
   4  -6  -8   -9.20   26.92
  -4   6   7   53.54   16.28
   4   6  -7   36.66   17.22
  -4  -6   7   57.99   14.52
  -4  -6   7   21.99   13.66
   4  -6  -7   50.35   19.65
  -4   6   6  -31.77   24.20
   4   6  -6    6.82   24.96
  -4  -6   6  -24.24   13.46
  -4  -6   6  -34.47   20.94
   4  -6  -6  -33.02   29.70
  -4   6   5   96.34   19.72
   4   6  -5   57.24   19.52
  -4  -6   5  107.45   16.60
  -4  -6   5   90.21   16.54
   4  -6  -5  107.96   22.05
   4   6  -4  109.69   28.38
   4  -6  -4   34.98   20.01
  -4  -6   4   48.79   14.29
  -4  -6   4   36.44   24.82
  -4   6   3  249.09   24.69
   4   6  -3  204.40   23.38
  -4  -6   3  222.49   20.75
  -4  -6   3  207.16   22.31
   4  -6  -3  211.16   25.97
   4   6  -2   -5.81   25.37
  -4  -6   2   11.56   12.41
  -4   6   1  193.17   25.04
   4   6  -1  214.11   23.31
  -4  -6   1  230.81   20.77
  -4  -6   1  224.20   22.99
   4  -6  -1  256.23   40.87
  -4   6   0  232.12   37.34
   4   6   0  155.85   33.03
   4  -6   0  166.68   25.26
  -4   6  -1  159.36   23.69
   4   6   1  125.17   18.87
  -4  -6  -1  116.84   24.99
  -4  -6  -1  120.11   19.38
   4  -6   1  178.32   33.91
  -4   6  -2  136.14   22.25
   4   6   2  113.75   26.40
  -4  -6  -2   66.34   21.60
  -4  -6  -2   49.25   18.04
   4  -6   2  126.54   20.48
  -4   6  -3   16.01   15.88
   4   6   3   35.30   13.94
  -4  -6  -3    0.50   11.27
  -4  -6  -3   27.99   14.66
   4  -6   3   26.14   24.41
  -4   6  -4    1.73   15.24
   4   6   4   -0.64   12.59
  -4  -6  -4    0.32   10.49
  -4  -6  -4    1.95   13.90
   4  -6   4   23.03   14.69
  -4   6  -5   10.25   24.38
   4   6   5   10.84   20.00
  -4  -6  -5    9.22   11.27
  -4  -6  -5    5.63   13.81
   4  -6   5   15.60   21.81
  -4   6  -6    6.32   15.59
   4   6   6   -4.32   12.42
  -4  -6  -6   -0.23   10.71
  -4  -6  -6    0.87   21.39
   4  -6   6    8.28   13.85
  -4   6  -7   35.61   25.12
   4   6   7  -18.53   19.31
  -4  -6  -7   11.74   16.70
  -4  -6  -7   25.67   14.78
   4  -6   7   30.05   22.57
  -4   6  -8   22.54   17.45
   4   6   8   12.77   12.45
  -4  -6  -8   15.35   10.78
  -4  -6  -8  -33.09   22.18
   4  -6   8   -8.82   14.32
  -4   6  -9  -33.45   16.60
   4   6   9    1.00   17.59
  -4  -6  -9   21.26   10.56
  -4  -6  -9   -6.59   14.46
   4  -6   9   -8.31   20.14
  -4   6 -10   42.20   30.82
   4   6  10   22.29   13.49
  -4  -6 -10   57.36   19.15
  -4  -6 -10   36.38   17.38
   4  -6  10   36.47   15.53
  -4   6 -11   10.38   18.15
   4   6  11   -0.04   11.52
  -4  -6 -11    4.32   16.12
  -4  -6 -11   29.03   22.73
   4  -6  11    8.21   20.62
  -4   6 -12    0.20   18.71
   4   6  12   -2.64   11.89
  -4  -6 -12   23.14   11.08
  -4  -6 -12    8.82   15.55
   4  -6  12    4.44   13.75
  -4   6 -13   12.57   31.28
   4   6  13   26.06   12.27
  -4  -6 -13   29.91   11.73
  -4  -6 -13   15.46   17.08
   4  -6  13   19.05   23.30
   4   6  14   25.31   12.28
  -4   6 -14   39.68   32.19
   4  -6  14   14.22   14.04
  -4  -6 -14   26.81   15.98
  -4  -6 -14    1.87   27.01
  -4   6 -15   11.53   21.47
  -4  -6 -15   20.81   10.97
   4  -6  15   -7.32   22.15
  -4  -6 -15   48.09   18.26
  -4   6 -16   19.52   22.25
  -4  -6 -16   16.95   17.15
   4  -6  16   25.50   13.62
  -4  -6 -16   20.41   18.94
  -4   6 -17   32.84   22.09
  -4  -6 -17    4.06    9.60
   4  -6  17  -10.96   13.50
  -4  -6 -17   39.57   28.00
  -4   7  11    6.91   18.72
   4   7 -11   48.10   21.89
  -4  -7  11   40.45   17.69
  -4  -7  11   39.83   14.95
   4  -7 -11    5.98   25.17
  -4   7  10  -40.82   26.60
   4   7 -10    2.28   20.08
  -4  -7  10   14.12   15.91
  -4  -7  10  -33.56   15.04
   4  -7 -10  -16.35   22.28
  -4   7   9   77.65   22.81
   4   7  -9   47.35   36.40
  -4  -7   9  117.95   20.41
  -4  -7   9   79.79   18.59
   4  -7  -9  108.98   40.10
  -4   7   8   13.59   17.46
   4   7  -8  -16.87   17.97
  -4  -7   8   15.59   15.28
  -4  -7   8   -2.75   21.93
   4  -7  -8  -33.05   19.64
  -4   7   7    1.09   17.91
   4   7  -7    5.83   17.89
  -4  -7   7   10.95   15.23
  -4  -7   7    8.91   14.37
   4  -7  -7   18.87   20.26
  -4   7   6    3.14   17.86
   4   7  -6   12.50   27.67
  -4  -7   6   14.36   14.73
  -4  -7   6    9.88   21.88
   4  -7  -6    8.82   30.69
  -4   7   5   28.60   28.26
   4   7  -5  -24.92   18.13
  -4  -7   5   12.14   14.93
  -4  -7   5  -24.97   15.42
   4  -7  -5  -15.63   19.57
  -4   7   4   56.91   21.93
   4   7  -4   48.00   31.98
  -4  -7   4   61.92   17.40
  -4  -7   4   54.32   18.41
   4  -7  -4   53.37   23.22
  -4   7   3   25.26   32.12
   4   7  -3   53.18   19.59
  -4  -7   3   31.67   16.58
  -4  -7   3   38.88   17.78
   4  -7  -3   94.08   34.91
  -4   7   2   64.24   22.19
   4   7  -2   39.11   30.48
  -4  -7   2   34.12   25.05
  -4  -7   2   32.34   18.48
   4  -7  -2   87.94   22.46
  -4   7   1   43.60   21.50
   4   7  -1   28.53   18.55
  -4  -7   1   29.94   24.18
  -4  -7   1   49.66   28.56
   4  -7  -1   54.63   32.56
  -4   7   0    9.88   21.53
   4   7   0   38.05   18.81
  -4  -7   0   36.66   23.05
  -4  -7   0   39.00   18.06
   4  -7   0   49.40   20.05
  -4   7  -1   -8.43   18.98
   4   7   1   12.94   15.61
  -4  -7  -1    2.38   13.50
  -4  -7  -1   25.22   24.99
   4  -7   1   11.67   19.33
  -4   7  -2   39.08   30.30
   4   7   2    2.80   17.49
  -4  -7  -2    9.35   14.85
  -4  -7  -2   70.84   18.94
   4  -7   2   43.94   21.30
  -4   7  -3   88.46   24.65
   4   7   3  104.89   20.65
  -4  -7  -3   90.81   18.70
  -4  -7  -3  102.66   32.86
   4  -7   3  115.07   23.95
  -4   7  -4   22.63   20.66
   4   7   4   25.12   17.49
  -4  -7  -4   14.04   14.23
  -4  -7  -4   27.71   18.25
   4  -7   4  -24.86   28.52
  -4   7  -5   51.54   33.95
   4   7   5   41.25   17.48
  -4  -7  -5   48.20   15.72
  -4  -7  -5   26.23   20.00
   4  -7   5   49.14   19.81
  -4   7  -6   -4.92   20.68
   4   7   6    2.99   16.34
  -4  -7  -6   19.28   20.95
  -4  -7  -6   42.46   27.30
   4  -7   6   21.94   28.83
  -4   7  -7   38.48   22.00
   4   7   7    9.29   16.51
  -4  -7  -7   38.25   20.90
  -4  -7  -7   23.88   19.05
   4  -7   7   21.76   18.49
  -4   7  -8   -9.03   30.49
   4   7   8   10.73   15.38
  -4  -7  -8   -1.44   12.44
  -4  -7  -8    6.87   17.28
   4  -7   8    4.74   16.79
  -4   7  -9   -0.02   19.55
   4   7   9   -8.29   13.73
  -4  -7  -9   -0.14   12.72
  -4  -7  -9    0.50   26.96
   4  -7   9    9.03   15.79
  -4   7 -10   -7.99   20.50
   4   7  10   11.23   14.21
  -4  -7 -10   32.01   20.26
  -4  -7 -10   -6.69   17.82
   4  -7  10  -12.50   16.67
   5   0 -28    7.43   11.98
   5   0 -28  -18.37   14.21
   5   0 -27   44.55   13.07
   5   0 -26  -17.24   17.51
   5   0 -25    9.36   13.81
   5   0 -24   10.75    8.41
   5   0 -23   35.42    9.18
   5   0 -22    3.29    7.46
   5   0 -21   29.81   12.04
   5   0 -20    0.00    8.99
   5   0 -19   39.78    6.97
   5   0 -18    2.73    5.43
   5   0 -17    7.87    5.48
   5   0 -16   12.80    8.00
   5   0 -15  219.87    8.53
   5   0 -14    2.55    3.88
   5   0 -13   95.93    5.23
   5   0 -13  106.92    5.45
   5   0 -12   -2.14    3.31
   5   0 -12    2.84    5.12
   5   0 -11  534.25   12.97
   5   0 -11  491.28   14.55
   5   0 -10    1.59    2.17
   5   0 -10   -3.02    2.79
   5   0  -9  415.47   10.32
   5   0  -9  405.31    9.29
   5   0  -8    5.71    3.18
   5   0  -8   -0.22    2.23
   5   0  -7  156.34    5.94
   5   0  -7  146.78    5.37
   5   0  -6    2.13    2.18
   5   0  -6    2.76    1.80
   5   0  -5   21.64    4.08
   5   0  -5   15.46    1.80
   5   0  -4    1.52    2.26
   5   0  -4   -1.20    2.20
   5   0  -4    2.38    2.35
   5   0  -3 5204.98  187.13
   5   0  -3 4961.02  158.33
   5   0  -3 5161.01  181.59
   5   0  -2   -2.43    2.59
   5   0  -2   -0.85    3.26
   5   0  -1 1527.85   35.46
   5   0  -1 1589.06   34.57
   5   0   0   -1.28    2.71
   5   0   0    2.24    1.65
   5   0   1  352.76    8.21
   5   0   1  347.23    5.12
  -5   0  -1  345.32    5.46
   5   0   2   -1.90    4.55
   5   0   2    0.71    0.97
  -5   0  -2    3.93    1.92
   5   0   3   63.84    5.64
   5   0   3   63.68    1.86
  -5   0  -3   61.39    3.26
   5   0   4    1.02    4.03
   5   0   4    1.92    1.45
  -5   0  -4   -0.79    2.88
   5   0   5    0.99    4.22
   5   0   5    2.52    1.84
  -5   0  -5    2.89    3.14
   5   0   6   -5.14    3.98
   5   0   6   -0.42    1.30
  -5   0  -6   -1.44    3.38
   5   0   7   16.85    4.47
   5   0   7   21.77    2.72
  -5   0  -7   16.57    4.49
   5   0   8   -4.26    2.66
   5   0   8   -2.39    2.82
  -5   0  -8   -2.32    2.71
   5   0   9  917.13   20.20
   5   0   9  910.77   18.71
  -5   0  -9  906.97   22.13
   5   0  10    4.82    2.59
   5   0  10    0.84    2.28
  -5   0 -10   -3.40    5.08
   5   0  11   79.32    5.49
  -5   0 -11   91.75    7.56
   5   0  12    1.96    3.97
  -5   0 -12   -5.35    6.07
   5   0  13    1.62    2.69
  -5   0 -13    5.61    6.15
   5   0  14   -2.06    3.83
  -5   0 -14    5.39    6.50
   5   0  15   -0.67    4.43
  -5   0 -15    5.56    7.79
   5   0  16    3.54    2.92
  -5   0 -16    4.93    8.64
   5   0  17  334.46   11.47
  -5   0 -17  340.79   19.13
   5   0  18    2.53    2.86
  -5   0 -18    0.55    6.49
   5   0  19   13.29    4.92
  -5   0 -19   26.35    7.47
   5   0  20    3.98    3.23
  -5   0 -20    9.80    7.23
   5   0  21  318.99   12.97
  -5   0 -21  344.10   17.58
   5   0  22   -0.40    5.18
  -5   0 -22    9.50    8.21
   5   0  23  106.70    5.92
  -5   0 -23  119.02   18.36
  -5   0 -24   -1.55   13.79
  -5   0 -25    7.87   16.99
  -5   0 -26    6.43   11.10
  -5   0 -27   14.29   12.43
   5   1 -28   30.81   26.06
   5  -1 -28   28.95   18.92
   5  -1 -28   68.57   17.97
   5   1 -27   23.67   20.58
   5  -1 -27   14.52   10.08
   5  -1 -27   27.10   16.15
   5   1 -26   21.35   18.21
   5  -1 -26   10.11    8.81
   5  -1 -26   20.85   14.50
   5   1 -25   21.25   11.23
   5  -1 -25    8.44    8.36
   5  -1 -25   -4.91   13.33
   5   1 -24   -9.77   10.33
   5  -1 -24    5.61   12.04
   5  -1 -24    4.26   12.69
   5   1 -23   27.06   10.92
   5  -1 -23   21.03    7.38
   5  -1 -23   35.96   13.10
   5   1 -22    1.15    8.93
   5  -1 -22    5.40    6.38
   5  -1 -22    5.98   11.43
   5   1 -21  288.94   17.93
   5  -1 -21  295.89   19.16
   5  -1 -21  311.21   29.88
   5   1 -20   19.09   13.91
   5  -1 -20   16.14    8.89
   5  -1 -20   37.27   17.30
   5   1 -19  197.61   17.51
   5  -1 -19  199.23    9.84
   5  -1 -19  228.81   25.00
   5   1 -18  392.67   22.94
   5  -1 -18  375.50   14.07
   5  -1 -18  393.48   31.75
   5   1 -17   54.39    7.83
   5  -1 -17   43.73    9.00
   5  -1 -17   89.84   17.67
   5   1 -16  177.86   10.70
   5  -1 -16  194.16    8.67
   5  -1 -16  200.24    4.01
   5  -1 -16  205.38   22.79
   5   1 -15   29.09    6.02
   5  -1 -15   25.97    4.85
   5  -1 -15   24.80    2.28
   5  -1 -15   34.25    8.85
  -5  -1  15   23.03    3.26
   5   1 -14  387.43   13.91
   5  -1 -14  384.98   11.95
   5  -1 -14  411.51    8.00
   5  -1 -14  423.74   18.85
  -5  -1  14  384.09    8.32
  -5  -1  14  435.10   12.19
   5   1 -13   98.88    6.75
   5  -1 -13   95.11    5.73
   5  -1 -13  105.08    3.62
   5  -1 -13   96.56    9.80
  -5  -1  13   88.04    4.50
  -5  -1  13   98.81    5.49
   5   1 -12  810.78   23.13
   5  -1 -12  854.86   16.87
   5  -1 -12  847.79   29.42
  -5  -1  12  832.74   20.58
  -5  -1  12  863.02   21.07
   5   1 -11    8.66    4.11
   5  -1 -11    9.02    2.53
   5  -1 -11   19.80    9.46
  -5  -1  11    9.63    2.33
  -5  -1  11   13.35    4.82
   5   1 -10   52.01    4.71
   5   1 -10   45.24    6.69
   5  -1 -10   32.22   10.98
  -5  -1  10   45.85    4.26
  -5  -1  10   48.92    3.47
   5   1  -9  546.00   19.07
   5   1  -9  646.00   19.94
   5  -1  -9  587.43   19.69
  -5  -1   9  562.53   14.81
  -5  -1   9  594.05   12.74
   5   1  -8  869.34   27.06
   5   1  -8  864.88   21.43
   5  -1  -8  827.80   31.40
  -5  -1   8  894.63   23.00
  -5  -1   8  875.95   20.37
   5   1  -7 1131.39   31.06
   5   1  -7 1104.97   27.62
   5  -1  -7 1196.68   36.15
  -5  -1   7 1182.86   30.92
  -5  -1   7 1224.17   27.60
   5   1  -6  174.55    9.23
   5   1  -6  176.87    7.93
   5  -1  -6  183.55    8.86
  -5  -1   6  179.07    7.64
  -5  -1   6  173.47    4.21
   5   1  -5   -2.80    3.66
   5   1  -5    1.73    3.67
  -5   1   5    2.14    3.39
   5  -1  -5   -6.17    4.44
  -5  -1   5    0.44    2.38
  -5  -1   5   -1.19    4.28
   5   1  -4   80.59    7.72
   5   1  -4   94.85    5.42
  -5   1   4   83.12    5.02
   5  -1  -4   95.53    6.33
  -5  -1   4   88.73    2.49
  -5  -1   4   98.33    6.38
   5   1  -3   30.51    4.49
   5   1  -3   28.42    4.27
  -5   1   3   31.04    6.05
   5  -1  -3   33.73    4.70
  -5  -1   3   36.23    2.40
  -5  -1   3   28.85    5.08
   5   1  -2  201.18   10.93
   5   1  -2  197.73    4.97
  -5   1   2  196.20    7.35
   5  -1  -2  187.31    7.97
  -5  -1   2  203.95    4.32
  -5  -1   2  197.16    6.16
   5   1  -1   51.41    4.77
  -5   1   1   57.93    7.19
   5  -1  -1   47.86    5.01
  -5  -1   1   61.50    2.38
  -5  -1   1   55.53    4.30
   5   1   0  405.42   11.49
  -5   1   0  388.30   14.52
   5   1   0  403.31    8.18
  -5  -1   0  427.82   10.31
  -5  -1   0  399.57    6.81
   5  -1   0  400.04   12.02
   5   1   1 8937.98  447.28
  -5   1  -1 8362.89  443.45
   5   1   1 9219.51  406.67
  -5  -1  -1 9390.04  458.16
  -5  -1  -1 9124.06  404.85
   5  -1   1 8603.09  438.86
   5   1   2  172.60    7.08
  -5   1  -2  171.00    9.92
   5  -1   2  170.09    9.00
  -5  -1  -2  169.94    4.61
  -5  -1  -2  161.47    5.46
   5   1   3  328.03   13.30
  -5   1  -3  320.56   13.22
  -5  -1  -3  309.38    7.94
   5  -1   3  323.49    9.24
  -5  -1  -3  327.64    7.70
   5   1   4  679.93   20.35
  -5   1  -4  696.65   22.53
  -5  -1  -4  736.51   19.07
   5  -1   4  710.45   17.37
  -5  -1  -4  713.40   16.19
   5   1   5  293.39   11.52
  -5   1  -5  277.92   12.75
   5  -1   5  318.07   11.28
  -5  -1  -5  296.63    4.98
  -5  -1  -5  303.05    7.58
  -5  -1  -5  329.52    9.55
   5   1   6 1844.58   55.29
  -5   1  -6 1819.06   55.26
   5  -1   6 1826.31   52.19
  -5  -1  -6 1912.54   43.20
  -5  -1  -6 1920.95   48.55
  -5  -1  -6 1942.69   52.51
   5   1   7  288.74   11.14
  -5   1  -7  270.03   13.02
   5  -1   7  297.98   10.06
  -5  -1  -7  292.41    5.59
  -5  -1  -7  292.94    9.31
  -5  -1  -7  301.56   10.18
   5   1   8    0.08    4.91
  -5   1  -8    7.27    6.55
   5  -1   8    2.64    4.79
  -5  -1  -8    1.48    2.81
  -5  -1  -8    5.47    2.66
  -5  -1  -8   -1.57    3.31
   5   1   9   96.84    7.56
  -5   1  -9   89.87    6.60
  -5  -1  -9   95.84    3.33
   5  -1   9   99.22    4.52
  -5  -1  -9   90.13    7.43
   5   1  10  962.37   25.01
  -5   1 -10  904.37   32.57
  -5  -1 -10  929.41   22.18
   5  -1  10  963.50   23.08
  -5  -1 -10  965.30   25.38
   5   1  11    4.32    3.47
  -5   1 -11    2.03    5.13
  -5  -1 -11   -5.89    4.04
   5  -1  11    9.47    4.51
  -5  -1 -11    3.94    4.20
   5   1  12  517.43   14.27
  -5   1 -12  544.11   19.07
  -5  -1 -12  527.88   12.86
   5  -1  12  559.49   13.97
  -5  -1 -12  565.13   16.64
   5   1  13   -3.16    5.19
  -5   1 -13   -4.80    9.26
  -5  -1 -13    4.79    3.04
   5  -1  13    0.34    5.16
   5   1  14   77.71    7.73
  -5   1 -14   76.97   12.15
  -5  -1 -14   75.59    6.97
   5  -1  14   87.54    5.16
   5   1  15   58.59    5.01
  -5   1 -15   59.62    8.39
  -5  -1 -15   58.97    7.68
   5  -1  15   60.88    7.72
   5   1  16  863.58   28.89
  -5   1 -16  886.26   33.85
  -5  -1 -16  921.94   26.69
   5  -1  16  978.88   26.57
   5   1  17   69.10    8.16
  -5   1 -17   73.79   10.13
  -5  -1 -17   65.42    6.32
   5  -1  17   83.59    6.08
   5   1  18   23.40    4.49
  -5   1 -18   15.64    9.11
   5  -1  18   24.06    3.42
  -5  -1 -18   12.82    8.11
   5  -1  18   33.43    8.00
   5   1  19  717.54   26.46
  -5   1 -19  715.58   31.48
   5  -1  19  733.70   22.16
  -5  -1 -19  733.25   31.15
   5  -1  19  781.42   23.58
  -5  -1 -19  776.75   29.42
   5   1  20    4.31    4.11
  -5   1 -20    7.60    8.74
   5  -1  20   -4.03    2.93
  -5  -1 -20    2.77    5.60
   5  -1  20    0.59    5.10
  -5  -1 -20   -0.34    7.41
   5   1  21   45.79    8.19
  -5   1 -21   47.61   11.45
  -5  -1 -21   37.59    7.56
   5  -1  21   38.19    5.79
  -5  -1 -21   54.62    9.65
   5   1  22   -0.01    6.76
  -5   1 -22    6.50   10.05
  -5  -1 -22    2.60   10.03
   5  -1  22   -6.43    4.35
  -5  -1 -22    7.66    8.62
  -5   1 -23  231.01   19.55
  -5  -1 -23  258.37   22.05
  -5  -1 -23  244.92   16.92
  -5   1 -24   -2.08   10.97
  -5  -1 -24   15.80    8.43
   5  -1  24   -4.94    4.88
  -5  -1 -24   10.48    9.80
  -5   1 -25   27.58   19.70
  -5  -1 -25   15.84    9.69
  -5  -1 -25   28.81   16.87
  -5   1 -26   30.56   20.91
  -5  -1 -26   31.03   10.45
  -5  -1 -26    4.63   20.13
  -5   1 -27   -4.43   21.68
  -5  -1 -27   -4.28   15.35
  -5  -1 -27    9.83   12.73
   5   2 -27   87.22   20.00
   5  -2 -27   84.38   12.09
   5  -2 -27  111.56   22.90
   5   2 -26   -5.59   14.15
   5  -2 -26  -13.05   13.56
   5  -2 -26   -0.36   17.01
   5   2 -25   74.89   17.19
   5  -2 -25   78.03   14.52
   5  -2 -25   78.96   31.29
   5   2 -24   10.65   12.99
   5  -2 -24   21.68    7.68
   5  -2 -24   33.15   24.64
   5   2 -23   19.66   12.95
   5  -2 -23   23.51    7.48
   5  -2 -23   21.45   24.19
   5   2 -22   18.32   11.35
   5  -2 -22    3.78    9.87
   5  -2 -22   73.10   22.50
   5   2 -21    2.15   10.51
   5  -2 -21    1.82    5.92
   5  -2 -21   23.83   20.63
  -5  -2  21    1.63    3.74
  -5  -2  21    4.81    5.88
   5   2 -20  161.52   14.96
   5  -2 -20  136.19   13.67
   5  -2 -20  129.86   27.80
  -5  -2  20  140.86    9.24
   5   2 -19    2.79    9.26
   5  -2 -19   13.65    5.67
   5  -2 -19   -2.94   12.32
  -5  -2  19    2.64    3.04
  -5  -2  19   27.63    8.45
   5   2 -18    2.93    8.78
   5  -2 -18    6.99    5.55
   5  -2 -18    1.16    1.23
   5  -2 -18   -5.29   11.43
  -5  -2  18   -0.75    4.73
  -5  -2  18    7.86    5.03
   5   2 -17  842.04   34.26
   5  -2 -17  829.87   42.63
  -5  -2  17  784.69   22.53
  -5  -2  17  875.00   25.37
   5   2 -16  290.48   16.15
   5  -2 -16  287.23   21.26
  -5  -2  16  269.55   12.49
  -5  -2  16  310.04   14.63
   5   2 -15  263.77   15.07
   5  -2 -15  259.14   19.45
  -5  -2  15  270.48   13.26
  -5  -2  15  292.89   10.37
   5   2 -14  171.31   11.84
   5  -2 -14  187.15   22.03
  -5  -2  14  171.23    8.02
  -5  -2  14  191.89    7.82
   5   2 -13  583.11   22.66
   5  -2 -13  651.35   40.80
  -5  -2  13  621.98   18.24
  -5  -2  13  703.51   22.23
   5   2 -12  331.35   20.18
   5  -2 -12  305.12   18.93
  -5  -2  12  324.06   13.97
  -5  -2  12  339.04   10.14
   5   2 -11   97.09    8.12
   5  -2 -11   56.84   10.79
  -5  -2  11   87.73    9.11
  -5  -2  11   91.98    7.07
   5   2 -10  157.95    9.13
   5  -2 -10  154.24   12.55
  -5  -2  10  165.90   11.05
  -5  -2  10  164.94    6.20
   5   2  -9   10.30    8.14
  -5   2   9    4.17    5.27
   5  -2  -9   -2.13    7.15
  -5  -2   9   -6.17    4.60
  -5  -2   9   -1.51    4.32
   5   2  -8  814.96   25.70
  -5   2   8  779.03   30.47
   5  -2  -8  822.36   30.27
  -5  -2   8  864.27   20.80
  -5  -2   8  845.56   24.76
   5   2  -7   33.51    8.49
  -5   2   7   36.80    6.37
   5  -2  -7   34.87   11.78
  -5  -2   7   51.04    6.11
  -5  -2   7   33.60    5.25
   5   2  -6   14.90    7.28
  -5   2   6    8.27    5.77
   5  -2  -6    6.89    6.70
  -5  -2   6   14.62    4.84
  -5  -2   6   10.95    4.52
   5   2  -5   41.79    8.22
  -5   2   5   41.70    6.80
   5  -2  -5   54.31    7.52
  -5  -2   5   43.40    3.92
  -5  -2   5   52.28    5.70
   5   2  -4 2440.04   83.71
   5   2  -4 2428.22   84.79
  -5   2   4 2359.76   83.49
   5  -2  -4 2450.25   88.62
  -5  -2   4 2353.57   69.40
  -5  -2   4 2553.70   82.35
   5   2  -3  110.86    8.53
   5   2  -3  112.90    6.49
  -5   2   3   97.05    8.53
   5  -2  -3  114.16    8.75
  -5  -2   3  112.46    7.09
  -5  -2   3  124.81   10.56
   5   2  -2  205.18   14.80
   5   2  -2  178.45   10.96
  -5   2   2  175.07    9.92
   5  -2  -2  185.02   11.02
  -5  -2   2  208.08    9.18
  -5  -2   2  204.50   11.20
   5   2  -1   79.89    7.27
  -5   2   1   78.75   11.13
   5   2  -1   71.27    5.25
  -5  -2   1   77.22    5.88
  -5  -2   1   78.86    4.61
   5  -2  -1   84.46    7.76
   5   2   0   -4.61    5.50
  -5   2   0    0.94    8.56
   5   2   0    7.58    3.62
  -5  -2   0    0.06    4.49
  -5  -2   0   -0.07    5.21
   5  -2   0    3.98    8.91
   5   2   1 1565.39   49.78
  -5   2  -1 1480.32   50.02
   5   2   1 1565.54   43.64
  -5  -2  -1 1576.15   45.98
  -5  -2  -1 1629.89   48.70
   5  -2   1 1499.20   50.78
   5   2   2 1848.30   60.48
  -5   2  -2 1777.52   61.88
   5   2   2 1801.33   51.88
  -5  -2  -2 1909.32   62.35
  -5  -2  -2 1877.30   59.58
   5  -2   2 1803.06   61.16
   5   2   3 2682.49  100.59
   5   2   3 2409.74   78.48
  -5   2  -3 2505.13   92.67
   5  -2   3 2541.30   90.48
  -5  -2  -3 2544.79   81.04
  -5  -2  -3 2694.20   86.48
   5   2   4   57.13   10.21
   5   2   4   67.91    6.90
  -5   2  -4   73.72    7.69
   5  -2   4   71.56   10.57
  -5  -2  -4   67.11    5.48
  -5  -2  -4   66.41    5.68
   5   2   5   94.13   10.04
   5   2   5   77.55    4.81
  -5   2  -5   85.65    8.16
   5  -2   5   77.82    9.80
  -5  -2  -5   87.06    8.31
  -5  -2  -5   90.84    8.68
   5   2   6   37.97    8.64
   5   2   6   35.07    3.87
  -5   2  -6   31.38    6.83
   5  -2   6   19.47    8.24
  -5  -2  -6   27.18    4.22
  -5  -2  -6   37.05    7.85
   5   2   7  453.72   19.47
  -5   2  -7  449.59   17.91
  -5  -2  -7  450.25   12.80
   5  -2   7  454.18   19.57
   5   2   8  401.14   18.63
  -5   2  -8  411.96   22.32
  -5  -2  -8  418.22   14.52
   5  -2   8  415.21   17.93
  -5  -2  -8  427.23   19.63
   5   2   9  110.36   10.64
  -5   2  -9   99.42    9.75
  -5  -2  -9  115.92    5.64
   5  -2   9  116.27   11.00
  -5  -2  -9  108.98    8.13
   5   2  10  465.72   20.81
  -5   2 -10  449.29   25.07
  -5  -2 -10  445.54   14.79
   5  -2  10  496.98   16.32
  -5  -2 -10  445.91   21.84
   5   2  11  582.54   24.48
  -5   2 -11  580.55   24.40
  -5  -2 -11  594.38   15.60
   5  -2  11  593.46   18.94
  -5  -2 -11  602.68   22.65
   5   2  12    2.69    5.05
  -5   2 -12    8.80   11.83
   5  -2  12   -7.98    8.15
  -5  -2 -12    6.47    3.26
  -5  -2 -12    6.13    5.12
  -5  -2 -12   13.98   10.21
   5   2  13  644.93   21.77
  -5   2 -13  611.97   26.84
   5  -2  13  648.13   20.26
  -5  -2 -13  625.33   16.66
  -5  -2 -13  629.92   19.38
  -5  -2 -13  605.58   25.11
   5   2  14    9.22    8.27
  -5   2 -14   16.84    8.65
   5  -2  14    6.00    7.45
  -5  -2 -14    8.08    6.02
  -5  -2 -14   12.73    3.42
  -5  -2 -14   23.25    8.03
   5   2  15   11.30    8.86
  -5   2 -15   23.89    9.17
  -5  -2 -15   13.44    4.03
   5  -2  15   18.68    5.34
  -5  -2 -15   18.78    8.39
   5   2  16    8.52    5.59
  -5   2 -16   -6.65   13.38
  -5  -2 -16    0.82    6.01
   5  -2  16    5.87    7.61
  -5  -2 -16    4.96   13.24
   5   2  17  214.04   10.94
  -5   2 -17  227.03   23.82
  -5  -2 -17  207.39    8.84
   5  -2  17  239.60   10.30
  -5  -2 -17  226.83   20.64
  -5   2 -18   -8.42    9.95
  -5  -2 -18   -1.88    4.43
   5  -2  18    9.97    7.54
  -5  -2 -18   15.42   12.63
  -5   2 -19  -10.37   10.53
  -5  -2 -19    4.79    7.33
   5  -2  19    0.47    5.16
  -5  -2 -19    0.84    8.70
  -5   2 -20   16.39   11.27
  -5  -2 -20    3.86    5.30
   5  -2  20   16.76    9.05
  -5  -2 -20   16.85    9.38
  -5   2 -21   23.38   12.43
  -5  -2 -21   16.75    6.01
   5  -2  21   28.41    6.40
  -5  -2 -21    7.87   10.86
  -5   2 -22   -7.63   12.28
  -5  -2 -22    0.55    9.83
   5  -2  22   -3.32    5.99
  -5  -2 -22    3.50   10.04
  -5   2 -23    1.66   12.73
  -5  -2 -23   -5.72    6.48
   5  -2  23   -1.20    9.97
  -5  -2 -23    6.49   10.63
  -5   2 -24   70.31   15.91
  -5  -2 -24   35.39    8.34
   5  -2  24   42.89    8.34
  -5  -2 -24   40.96   20.17
  -5   2 -25   22.44   15.55
  -5  -2 -25   30.68   12.47
   5  -2  25   16.33    8.05
  -5  -2 -25    4.13   20.03
  -5   2 -26   32.94   16.21
  -5  -2 -26   23.34    9.46
  -5  -2 -26   10.76   21.19
   5   3 -26   30.01   18.93
   5  -3 -26   24.95   14.59
   5  -3 -26   56.36   33.49
  -5  -3  26   54.58    9.68
   5   3 -25  225.68   27.41
   5  -3 -25  194.57   14.58
   5  -3 -25  253.65   44.36
  -5  -3  25  249.52   15.03
   5   3 -24   -5.76   15.11
   5  -3 -24    3.92    7.77
   5  -3 -24   10.42   27.02
  -5  -3  24   19.53    7.44
   5   3 -23   50.46   15.82
   5  -3 -23   10.74   12.41
   5  -3 -23   58.35   28.19
  -5  -3  23   46.27   11.87
   5   3 -22    7.67   13.46
   5  -3 -22    2.62    7.25
   5  -3 -22   11.65   23.98
  -5  -3  22    6.53    5.32
  -5  -3  22   19.61    6.79
   5   3 -21   -4.58   12.19
   5  -3 -21   18.74   23.47
  -5  -3  21   -8.60    8.82
  -5  -3  21    1.06    6.06
   5   3 -20   15.42   13.20
   5  -3 -20   20.63    4.31
   5  -3 -20   38.05   25.03
  -5  -3  20   25.03    6.55
  -5  -3  20   25.26   10.08
   5   3 -19   12.57   11.78
   5  -3 -19   16.13   14.22
  -5  -3  19    0.28    9.29
  -5  -3  19   13.50    5.83
   5   3 -18    0.31   10.86
   5  -3 -18    4.18   13.05
  -5  -3  18    3.57    6.62
  -5  -3  18   16.68    8.16
   5   3 -17    3.53   10.37
   5  -3 -17   10.77   13.06
  -5  -3  17    7.63    6.40
  -5  -3  17    1.50    5.34
   5   3 -16   -2.16   14.64
   5  -3 -16   -2.25   12.29
  -5  -3  16   14.32    9.50
  -5  -3  16   -1.52    5.16
   5   3 -15   17.11   15.60
   5  -3 -15   -6.06   18.39
  -5  -3  15    4.71   10.14
  -5  -3  15    9.52    8.37
   5   3 -14  639.30   31.69
   5  -3 -14  665.27   36.85
  -5  -3  14  641.30   25.07
  -5  -3  14  670.64   21.69
   5   3 -13  281.90   18.44
   5  -3 -13  306.34   24.35
  -5  -3  13  313.51   14.79
  -5  -3  13  294.11   15.70
   5   3 -12  531.47   31.79
   5  -3 -12  489.61   29.22
  -5  -3  12  517.22   20.18
  -5  -3  12  526.36   17.65
   5   3 -11   87.37   11.03
  -5   3  11   96.75   10.58
   5  -3 -11  109.76   21.59
  -5  -3  11   99.60    9.40
  -5  -3  11   82.16    8.54
   5   3 -10   49.28    9.56
  -5   3  10   50.79    9.69
   5  -3 -10   63.79   12.09
  -5  -3  10   58.44    6.26
  -5  -3  10   57.43   10.97
   5   3  -9  152.30   17.77
  -5   3   9  138.26   17.65
   5  -3  -9  140.81   21.96
  -5  -3   9  167.58   12.24
  -5  -3   9  160.28   13.33
   5   3  -8   14.67    6.82
  -5   3   8    7.42    7.88
   5  -3  -8    4.79    8.89
  -5  -3   8   -2.56    4.84
  -5  -3   8   -0.81    9.02
   5   3  -7  192.46   12.63
  -5   3   7  177.99   13.92
   5  -3  -7  194.34   21.30
  -5  -3   7  199.69    9.33
  -5  -3   7  198.38   14.89
   5   3  -6  367.65   23.13
  -5   3   6  383.26   27.47
   5  -3  -6  382.32   20.28
  -5  -3   6  423.01   19.31
  -5  -3   6  391.05   19.96
   5   3  -5  449.80   24.07
  -5   3   5  414.88   27.47
   5  -3  -5  459.76   21.92
  -5  -3   5  465.67   20.02
  -5  -3   5  419.41   22.17
   5   3  -4   33.54    6.99
  -5   3   4   23.80    8.30
   5  -3  -4   17.95    9.06
  -5  -3   4   18.73    8.32
  -5  -3   4   22.50    6.38
   5   3  -3   51.06    7.22
  -5   3   3   42.92    9.05
   5  -3  -3    7.98   15.01
  -5  -3   3   46.50    6.26
  -5  -3   3   44.62    7.04
   5   3  -2   89.81   11.64
  -5   3   2   55.73    9.71
   5  -3  -2   76.77   10.47
  -5  -3   2   88.59    7.04
  -5  -3   2   72.40    7.78
   5   3  -1    2.02    8.79
  -5   3   1    0.34    7.65
   5  -3  -1   -0.48    7.86
  -5  -3   1    8.70    5.89
  -5   3   0  184.84   18.58
   5   3   0  164.14   14.01
  -5  -3   0  186.80   10.57
  -5  -3   0  206.72   14.11
   5  -3   0  185.80   12.82
   5   3   1   35.81    6.50
   5  -3   1   36.49    8.48
  -5  -3  -1   32.04   11.09
  -5  -3  -1   40.35    9.83
  -5   3  -2   45.42    8.77
   5   3   2   53.96    6.93
  -5  -3  -2   51.20    7.08
  -5  -3  -2   51.10   10.23
   5  -3   2   53.60    9.00
  -5   3  -3  166.07   13.06
   5   3   3  169.64   14.24
  -5  -3  -3  182.72    9.83
  -5  -3  -3  209.20   15.62
   5  -3   3  176.46   12.07
  -5   3  -4    9.89    7.83
   5   3   4   -0.62    8.29
  -5  -3  -4    5.16    5.48
  -5  -3  -4    7.08    6.07
   5  -3   4   -6.12    7.00
  -5   3  -5   12.82   12.60
   5   3   5   -0.34    8.22
  -5  -3  -5   -0.09    8.85
  -5  -3  -5    1.65    7.97
   5  -3   5    8.90   10.78
  -5  -3  -5    2.43    6.08
   5   3   6  380.57   20.08
  -5   3  -6  422.32   21.11
   5  -3   6  417.25   25.29
  -5  -3  -6  422.07   15.73
  -5  -3  -6  434.06   23.58
   5   3   7  257.51   16.16
  -5   3  -7  254.87   16.42
   5  -3   7  266.68   14.83
  -5  -3  -7  287.37   11.90
  -5  -3  -7  255.57   19.17
   5   3   8  131.35   13.41
  -5   3  -8  130.40   18.76
   5  -3   8  143.33   10.58
  -5  -3  -8  122.20   11.23
  -5  -3  -8  144.15   10.90
  -5   3  -9  223.02   15.98
  -5  -3  -9  244.04   10.42
   5  -3   9  222.46   13.30
  -5  -3  -9  220.09   13.46
  -5   3 -10   42.61   16.75
  -5  -3 -10   51.11    9.40
   5  -3  10   61.71   12.94
  -5  -3 -10   51.13   13.52
  -5   3 -11  146.92   15.14
  -5  -3 -11  156.89    7.92
   5  -3  11  163.75   11.26
  -5  -3 -11  154.32   12.79
  -5   3 -12   41.31   16.51
  -5  -3 -12   26.98    7.73
   5  -3  12   12.59    6.99
  -5  -3 -12    5.51   13.46
  -5   3 -13  148.11   15.66
  -5  -3 -13  156.30    7.92
   5  -3  13  157.32   16.50
  -5  -3 -13  170.35   13.51
  -5   3 -14    1.74   10.91
  -5  -3 -14    6.77    6.55
   5  -3  14    4.44    6.73
  -5  -3 -14    5.04    9.00
  -5   3 -15    0.30   11.20
  -5  -3 -15    5.15    3.99
   5  -3  15    8.33   10.73
  -5  -3 -15    6.33   13.80
  -5   3 -16   21.68   18.04
  -5  -3 -16   13.10    6.08
   5  -3  16    1.20    6.72
  -5  -3 -16   21.86   10.01
  -5   3 -17   -2.09   11.92
   5  -3  17    7.59    9.26
  -5  -3 -17    0.21    4.92
  -5  -3 -17    5.19    3.67
  -5  -3 -17   -8.52    9.95
  -5   3 -18  291.32   24.77
   5  -3  18  334.33   15.43
  -5  -3 -18  316.24   16.89
  -5  -3 -18  275.42    9.72
  -5  -3 -18  291.05   21.96
  -5   3 -19   85.91   17.21
  -5  -3 -19   69.68    7.62
   5  -3  19   93.44   13.97
  -5  -3 -19   97.97   14.86
  -5   3 -20   48.90   16.24
  -5  -3 -20   52.90    7.01
   5  -3  20   52.86    8.31
  -5  -3 -20   41.23   21.76
  -5   3 -21    3.83   14.09
  -5  -3 -21   13.21    9.33
   5  -3  21    5.17   10.63
  -5  -3 -21   -4.98   18.51
  -5   3 -22   -3.57   14.94
  -5  -3 -22  -11.09    6.54
   5  -3  22   -6.36    7.05
  -5  -3 -22   33.93   19.41
  -5   3 -23   56.72   28.95
  -5  -3 -23   54.00   12.98
   5  -3  23   73.44    9.35
  -5  -3 -23   66.97   24.33
  -5   3 -24   75.93   32.09
  -5  -3 -24   83.07    9.75
   5  -3  24   76.62   14.73
  -5  -3 -24   26.16   25.80
  -5   3 -25   12.34   26.92
  -5  -3 -25   15.08    8.19
   5  -3  25    5.30    8.24
  -5  -3 -25   17.21   22.46
   5   4 -24   -6.50   28.06
   5  -4 -24    5.75    8.99
   5  -4 -24   -1.96   21.25
  -5  -4  24   11.44    8.22
   5   4 -23   -3.79   25.79
   5  -4 -23   -5.56   18.60
  -5  -4  23   -4.58    8.53
  -5  -4  23    5.38   11.69
   5   4 -22   48.69   28.32
   5  -4 -22   29.79   20.35
  -5  -4  22   39.63   17.18
  -5  -4  22   36.65    8.42
   5   4 -21   21.92   16.50
   5  -4 -21    4.44   18.31
  -5  -4  21   16.65   10.08
  -5  -4  21   11.55   10.71
   5   4 -20   -5.71   14.56
   5  -4 -20    6.44    9.41
   5  -4 -20   36.26   24.90
  -5  -4  20    3.61   14.23
  -5  -4  20    0.01    7.00
   5   4 -19   27.23   15.67
   5  -4 -19    1.21   29.74
  -5  -4  19   24.69   16.27
  -5  -4  19   36.24    7.64
   5   4 -18  -23.03   13.46
   5  -4 -18   -4.55   15.37
  -5  -4  18   -3.17    9.15
  -5  -4  18    4.08   10.78
   5   4 -17   38.29   15.35
   5  -4 -17   39.08   17.75
  -5  -4  17   58.90   10.71
  -5  -4  17   47.91    8.01
   5   4 -16   24.29   19.34
   5  -4 -16    6.15   15.14
  -5  -4  16    1.52   13.77
  -5  -4  16    9.98   10.32
   5   4 -15  178.62   20.31
   5  -4 -15  198.13   23.86
  -5  -4  15  225.66   22.25
  -5  -4  15  215.43   12.77
   5   4 -14  425.64   28.68
   5  -4 -14  474.11   47.86
  -5  -4  14  498.11   32.10
  -5  -4  14  475.76   19.49
   5   4 -13   98.14   15.02
  -5   4  13   74.40   12.68
   5  -4 -13   74.61   17.40
  -5  -4  13   86.08    9.28
  -5  -4  13   98.81   11.27
   5   4 -12  124.98   24.76
  -5   4  12  124.61   22.16
   5  -4 -12  157.82   18.98
  -5  -4  12  139.95   10.40
  -5  -4  12  147.32   12.87
   5   4 -11   15.00   11.84
  -5   4  11   24.92   10.79
   5  -4 -11   24.62   21.19
  -5  -4  11   23.06    7.67
  -5  -4  11   31.52    8.82
   5   4 -10   43.89   20.31
  -5   4  10   87.25   13.36
   5  -4 -10   97.49   16.25
  -5  -4  10   73.48   13.45
  -5  -4  10  102.12   10.70
   5   4  -9   37.63   10.71
  -5   4   9   15.14   11.43
   5  -4  -9   14.30   19.86
  -5  -4   9   33.41    7.86
  -5  -4   9   39.95    9.11
   5   4  -8   27.08   14.70
  -5   4   8    7.76   10.65
   5  -4  -8    6.29   11.75
  -5  -4   8    7.74   11.45
  -5  -4   8    9.31    8.24
   5   4  -7   43.71   10.83
  -5   4   7   43.77   19.54
   5  -4  -7   38.02   19.86
  -5  -4   7   35.01    8.18
  -5  -4   7   52.27    9.30
   5   4  -6  254.64   24.70
  -5   4   6  232.00   18.60
   5  -4  -6  270.68   19.57
  -5  -4   6  240.26   14.78
  -5  -4   6  251.11   14.64
   5   4  -5    3.30    8.85
  -5   4   5   14.82   10.15
   5  -4  -5  -18.99   16.54
  -5  -4   5   -0.07   10.33
  -5  -4   5    1.11    7.69
   5   4  -4    9.10    8.87
  -5   4   4    5.47   16.63
   5  -4  -4   16.64   10.59
  -5  -4   4    5.18    7.41
  -5  -4   4   25.65    7.95
   5   4  -3   13.69    9.12
  -5   4   3   19.11   11.03
  -5  -4   3   18.77    7.80
  -5  -4   3   22.69    8.47
  -5   4   2  116.75   13.97
   5   4  -2   78.16   17.95
  -5  -4   2  125.76   11.30
  -5  -4   2  102.78   16.23
   5  -4  -2  132.15   22.31
   5   4  -1   23.58   14.86
  -5   4   1   69.96   18.84
   5  -4  -1   28.67   11.50
  -5  -4   1   38.43    9.22
   5   4   0   28.40   13.66
  -5   4   0   35.89   10.70
  -5  -4   0    7.67    7.87
  -5  -4   0   16.99   12.47
   5   4   1   71.96   10.74
  -5   4  -1   87.87   13.34
  -5  -4  -1   82.65   10.54
  -5  -4  -1   86.51   14.14
   5   4   2  213.67   14.10
   5  -4   2  230.62   17.46
  -5  -4  -2  195.64   13.09
  -5  -4  -2  219.84   15.20
  -5   4  -3  212.97   18.95
   5   4   3  161.29   13.76
  -5  -4  -3  177.54   12.91
  -5  -4  -3  277.07   22.90
   5  -4   3  176.92   15.79
  -5   4  -4   49.76   13.28
   5   4   4   68.07   10.24
  -5  -4  -4   66.38    9.53
  -5  -4  -4  116.84   17.50
   5  -4   4  133.31   19.02
   5   4   5    5.06    8.11
   5  -4   5  -17.47    9.77
  -5  -4  -5   14.43   11.81
  -5  -4  -5   13.84    8.55
  -5   4  -6  407.31   26.22
   5   4   6  418.06   28.64
  -5  -4  -6  431.65   19.29
  -5  -4  -6  370.35   24.47
   5  -4   6  433.25   23.09
   5   4   7  408.79   29.86
  -5   4  -7  428.72   37.80
   5  -4   7  443.89   32.95
  -5  -4  -7  430.17   19.82
  -5  -4  -7  413.19   33.95
   5   4   8    2.41    7.71
  -5   4  -8    0.54   11.29
   5  -4   8    8.40    9.52
  -5  -4  -8   -4.33   11.37
  -5  -4  -8    4.21    9.36
   5   4   9   13.30    8.10
  -5   4  -9   30.26   18.90
   5  -4   9   29.47    9.66
  -5  -4  -9   19.19    7.27
  -5  -4  -9   19.72   10.01
   5   4  10   12.38   11.11
  -5   4 -10    4.04   11.89
   5  -4  10   -3.24   13.58
  -5  -4 -10   12.51    6.76
  -5  -4 -10   15.80    9.95
   5   4  11   -0.67    6.89
  -5   4 -11    8.84   11.66
   5  -4  11   11.84    8.80
  -5  -4 -11    2.22   10.33
  -5  -4 -11   -0.94    9.47
  -5   4 -12   89.38   24.03
  -5  -4 -12   90.24    8.24
   5  -4  12   77.35   11.65
  -5  -4 -12   72.47   13.20
  -5   4 -13  348.56   28.91
  -5  -4 -13  442.83   23.05
   5  -4  13  405.14   30.83
  -5  -4 -13  385.24   33.71
  -5   4 -14  184.84   20.87
  -5  -4 -14  174.66   10.16
   5  -4  14  186.36   14.39
  -5  -4 -14  171.59   17.64
  -5   4 -15    7.48   22.08
  -5  -4 -15   13.34    9.18
   5  -4  15   18.95   14.49
  -5  -4 -15   14.01   11.69
  -5   4 -16   15.94   15.55
  -5  -4 -16   31.22    6.16
   5  -4  16   43.83    9.60
  -5  -4 -16   26.89   19.63
  -5   4 -17   62.58   19.14
  -5  -4 -17   82.69   11.19
   5  -4  17   64.41   17.80
  -5  -4 -17   75.39   15.88
  -5   4 -18  191.19   25.71
  -5  -4 -18  197.00    9.95
   5  -4  18  195.26   15.00
  -5  -4 -18  189.11   21.77
  -5   4 -19  128.24   22.97
  -5  -4 -19  112.74   10.79
   5  -4  19  149.79   18.83
  -5  -4 -19  123.58   19.22
  -5   4 -20   -4.64   26.01
   5  -4  20   -8.00    8.51
  -5  -4 -20    8.76    6.38
  -5  -4 -20    3.27    4.42
  -5  -4 -20   18.70   21.24
  -5   4 -21  -16.74   25.46
   5  -4  21   -1.07    8.23
  -5  -4 -21    7.66   10.14
  -5  -4 -21    0.63    4.02
  -5  -4 -21   -6.40   21.78
  -5   4 -22   22.84   28.02
  -5  -4 -22   20.18    7.50
   5  -4  22   18.72    9.13
  -5  -4 -22    9.37   23.63
  -5   4 -23   46.64   20.55
  -5  -4 -23   35.28    8.61
   5  -4  23   36.01    9.98
  -5  -4 -23   57.20   26.63
   5   5 -21  -11.34   30.55
   5  -5 -21   -9.07   21.21
  -5  -5  21   31.47   21.49
  -5  -5  21    6.24    8.79
   5   5 -20  -18.32   27.09
   5  -5 -20  -13.13   19.86
  -5  -5  20   -0.91   12.67
  -5  -5  20    6.62   13.66
   5   5 -19   24.54   17.02
   5  -5 -19    4.50   18.67
  -5  -5  19   12.97   12.27
  -5  -5  19   -6.39    8.26
   5   5 -18   37.43   18.66
   5  -5 -18   -2.10   30.94
  -5  -5  18   32.49   19.66
  -5  -5  18   24.35   13.66
   5   5 -17   22.74   16.31
   5  -5 -17  -14.30   28.17
  -5  -5  17   19.49   18.46
  -5  -5  17   -5.28    8.50
   5   5 -16   -9.66   23.70
   5  -5 -16   10.84   17.82
  -5  -5  16    1.95   11.63
  -5  -5  16    5.50    7.98
   5   5 -15  115.77   30.84
  -5   5  15  113.76   16.50
   5  -5 -15  140.72   24.32
  -5  -5  15  118.17   20.00
  -5  -5  15  127.24   16.51
   5   5 -14   60.15   17.35
  -5   5  14   57.78   13.63
   5  -5 -14   56.21   19.61
  -5  -5  14   46.78   10.77
  -5  -5  14   64.84   13.39
   5   5 -13   15.99   14.11
  -5   5  13   -4.21   12.20
   5  -5 -13   32.42   24.16
  -5  -5  13   -1.30   14.21
  -5  -5  13   11.49   11.01
   5   5 -12   48.14   23.91
  -5   5  12   32.14   13.51
   5  -5 -12   52.29   17.94
  -5  -5  12   35.40   10.45
  -5  -5  12   44.71   11.99
   5   5 -11    3.68   12.77
  -5   5  11   -2.89   11.69
   5  -5 -11  -11.45   15.17
  -5  -5  11   20.83   14.04
  -5  -5  11   -9.81   10.10
   5   5 -10   17.46   13.90
  -5   5  10   26.91   12.42
   5  -5 -10   36.74   24.66
  -5  -5  10    7.38    9.45
  -5  -5  10   32.96   16.79
   5   5  -9   -3.48   12.55
  -5   5   9    3.82   12.05
   5  -5  -9   -4.69   14.16
  -5  -5   9   18.13   14.17
  -5  -5   9   -2.01   15.06
   5   5  -8    8.01   11.99
  -5   5   8  -11.60   11.76
   5  -5  -8  -14.74   20.81
  -5  -5   8    3.34    8.65
  -5  -5   8   19.59   14.51
   5   5  -7   -1.64   12.40
  -5   5   7    9.81   12.60
   5  -5  -7   10.92   14.22
  -5  -5   7   27.26   14.88
  -5  -5   7   19.99   15.32
   5   5  -6   15.15   12.35
   5  -5  -6   23.58   14.13
  -5  -5   6   24.86   15.34
  -5  -5   6   22.29    9.85
  -5   5   5  322.59   25.80
   5   5  -5  345.54   24.34
  -5  -5   5  358.13   29.10
  -5  -5   5  337.51   22.91
   5  -5  -5  339.99   28.40
  -5   5   4  -37.68   25.82
   5   5  -4   69.73   21.43
  -5  -5   4   39.34   10.95
  -5  -5   4   -0.57   18.09
   5  -5  -4   46.09   17.36
  -5   5   3  154.82   18.97
   5   5  -3  137.79   16.73
  -5  -5   3  153.39   15.07
  -5  -5   3  145.23   15.13
   5  -5  -3  216.70   21.86
   5   5  -2   81.77   27.78
  -5  -5   2   88.00   12.74
  -5   5   1  741.04   41.60
   5   5  -1  629.09   51.65
  -5  -5   1  655.96   32.41
  -5  -5   1  588.92   35.38
   5  -5  -1  845.22   45.63
   5   5   0  154.10   16.84
  -5   5   0  187.01   20.43
  -5  -5   0  193.97   17.23
  -5  -5   0  160.12   15.82
  -5   5  -1  139.27   18.31
   5   5   1   72.03   13.85
  -5  -5  -1   93.48   13.46
  -5  -5  -1  161.30   22.44
   5  -5   1   65.27   16.91
  -5   5  -2   22.61   13.97
   5   5   2   43.72   17.62
  -5  -5  -2    6.16   15.42
  -5  -5  -2   -1.25   11.34
   5  -5   2   49.93   20.56
  -5   5  -3   49.48   15.06
   5   5   3   59.05   12.14
  -5  -5  -3   69.46   16.60
  -5  -5  -3   51.23   12.85
   5  -5   3   40.33   14.16
  -5   5  -4   11.71   13.01
   5   5   4    2.55   10.04
  -5  -5  -4    1.52    8.87
  -5  -5  -4   10.87   16.75
   5  -5   4   17.84   12.16
  -5   5  -5   12.01   12.22
   5   5   5   -2.97   14.64
  -5  -5  -5  -14.11    8.93
  -5  -5  -5   12.75   11.13
   5  -5   5   -4.62   18.61
  -5   5  -6   24.82   16.57
   5   5   6   45.80   11.79
  -5  -5  -6   47.97   11.02
  -5  -5  -6   47.54   20.55
   5  -5   6   75.02   14.23
  -5   5  -7   72.22   17.97
   5   5   7   72.69   12.41
  -5  -5  -7   72.94   17.66
  -5  -5  -7   52.57   15.33
   5  -5   7   77.31   23.34
  -5   5  -8  -19.98   13.73
   5   5   8   13.54   14.57
  -5  -5  -8    7.54    8.64
  -5  -5  -8    3.42   17.96
   5  -5   8    8.96   11.65
   5   5   9   14.95   10.25
  -5   5  -9   37.36   14.61
   5  -5   9   11.74   18.08
  -5  -5  -9   23.40    9.66
  -5  -5  -9   17.22   12.62
  -5   5 -10   12.27   21.83
   5   5  10    0.37    9.13
  -5  -5 -10   17.14   13.81
  -5  -5 -10   11.46   17.71
   5  -5  10  -10.53   11.06
   5   5  11   26.86   16.85
  -5   5 -11   42.85   17.07
   5  -5  11   24.46   12.42
  -5  -5 -11   43.04    9.25
  -5  -5 -11   26.16   14.67
   5   5  12  103.59   13.40
  -5   5 -12  129.37   21.48
   5  -5  12  144.46   17.12
  -5  -5 -12  126.28   12.54
  -5  -5 -12  114.52   18.97
  -5   5 -13   35.96   27.93
  -5  -5 -13   39.94   14.75
   5  -5  13   40.71   12.30
  -5  -5 -13    9.79   22.06
  -5   5 -14  -17.23   16.29
  -5  -5 -14   -4.85    7.67
   5  -5  14   -1.71   11.18
  -5  -5 -14    6.37   13.03
  -5   5 -15   35.29   19.61
  -5  -5 -15   54.70   14.39
   5  -5  15   57.74   12.88
  -5  -5 -15   40.09   16.33
  -5   5 -16  178.69   27.19
  -5  -5 -16  195.76   12.60
   5  -5  16  152.55   18.66
  -5  -5 -16  168.32   32.88
  -5   5 -17   38.45   34.65
  -5  -5 -17   71.97    9.46
   5  -5  17   73.03   13.72
  -5  -5 -17   80.06   18.86
  -5   5 -18  178.63   44.53
  -5  -5 -18  199.93   12.73
   5  -5  18  213.65   19.62
  -5  -5 -18  235.61   26.44
  -5   5 -19   41.10   20.98
  -5  -5 -19   32.86   11.76
   5  -5  19    5.18   16.82
  -5  -5 -19   18.95   17.02
  -5   5 -20    2.29   20.00
  -5  -5 -20    9.96    6.24
   5  -5  20   15.67   10.47
  -5  -5 -20    0.47   25.89
   5   6 -17   -1.26   20.62
   5  -6 -17   -3.87   23.40
  -5  -6  17   48.98   25.40
  -5  -6  17   15.11   10.72
   5   6 -16   77.27   25.05
   5  -6 -16   81.17   27.60
  -5  -6  16  127.96   20.06
  -5  -6  16   79.50   15.72
   5   6 -15   -7.76   18.35
  -5   6  15    2.94   13.77
   5  -6 -15   11.29   31.64
  -5  -6  15    9.26   10.95
  -5  -6  15    4.44   14.74
   5   6 -14   46.40   31.89
  -5   6  14   36.22   24.63
   5  -6 -14   50.05   22.65
  -5  -6  14   30.06   20.22
  -5  -6  14   47.90   16.77
   5   6 -13    4.91   18.03
  -5   6  13    0.75   13.71
   5  -6 -13    1.55   20.22
  -5  -6  13    6.64   11.07
  -5  -6  13   17.29   14.06
   5   6 -12   22.50   19.62
  -5   6  12   15.45   22.78
   5  -6 -12   19.29   32.44
  -5  -6  12   37.10   18.28
  -5  -6  12   51.79   15.06
   5   6 -11   31.01   26.62
  -5   6  11   21.83   15.48
   5  -6 -11   40.65   20.36
  -5  -6  11   17.70   12.20
  -5  -6  11   33.43   14.79
   5   6 -10   -8.02   16.71
  -5   6  10  -20.87   22.18
   5  -6 -10  -12.28   18.85
  -5  -6  10  -13.98   17.89
  -5  -6  10  -17.18   13.36
   5   6  -9   64.71   18.79
  -5   6   9   71.41   18.22
   5  -6  -9   60.63   21.34
  -5  -6   9   45.11   14.44
  -5  -6   9   37.01   23.00
  -5   6   8  133.17   21.75
   5   6  -8  144.75   22.75
  -5  -6   8  151.52   26.27
  -5  -6   8  123.28   17.60
   5  -6  -8  152.59   25.99
  -5   6   7   21.40   16.18
   5   6  -7   43.34   17.04
  -5  -6   7   31.67   20.77
  -5  -6   7   33.51   13.19
   5  -6  -7   12.50   20.41
  -5   6   6   11.80   16.13
   5   6  -6   -8.87   23.81
  -5  -6   6   42.64   19.40
  -5  -6   6   24.44   13.08
   5  -6  -6   -6.23   29.55
  -5   6   5   70.96   21.49
   5   6  -5  109.60   18.43
  -5  -6   5   98.04   15.54
  -5  -6   5   33.67   17.27
   5  -6  -5   78.14   23.19
  -5   6   4  163.47   23.17
   5   6  -4  130.45   30.91
  -5  -6   4  138.95   17.41
  -5  -6   4  112.31   19.37
   5  -6  -4  169.51   25.63
   5   6  -3  -18.03   14.75
  -5  -6   3    4.93   12.21
  -5  -6   3  -35.74   14.97
  -5   6   2  125.11   23.35
   5   6  -2  159.44   30.01
  -5  -6   2  152.67   17.71
  -5  -6   2  173.47   20.03
   5  -6  -2  138.61   23.66
  -5   6   1   17.90   17.13
   5   6  -1   55.81   15.55
  -5  -6   1    3.06   12.96
  -5  -6   1   20.06   14.42
   5  -6  -1   32.48   17.49
  -5   6   0   52.57   17.93
   5   6   0   64.82   15.62
  -5  -6   0   45.21   14.07
  -5  -6   0   65.25   22.97
   5  -6   0   38.22   19.03
  -5   6  -1   23.60   25.72
   5   6   1   -5.86   21.63
  -5  -6  -1    8.44   12.37
  -5  -6  -1   20.21   13.59
   5  -6   1   44.35   24.73
  -5   6  -2   10.10   15.05
   5   6   2   -9.97   12.97
  -5  -6  -2    7.59   17.77
  -5  -6  -2    3.11   20.40
   5  -6   2   28.64   15.45
  -5   6  -3  -10.39   25.63
   5   6   3   44.53   21.03
  -5  -6  -3   11.69   18.88
  -5  -6  -3   19.04   14.89
   5  -6   3   26.22   23.61
  -5   6  -4   -4.04   16.91
   5   6   4   15.38   13.13
  -5  -6  -4   28.20   11.12
  -5  -6  -4   10.63   22.37
   5  -6   4   20.29   15.52
  -5   6  -5   25.29   25.57
   5   6   5   34.22   19.28
  -5  -6  -5    9.50   11.05
  -5  -6  -5   15.83   14.07
   5  -6   5   16.97   23.23
  -5   6  -6   -4.29   15.91
   5   6   6   -8.88   12.10
  -5  -6  -6   -2.41   10.86
  -5  -6  -6    9.56   13.54
   5  -6   6   -1.13   13.93
  -5   6  -7   -3.05   16.17
   5   6   7   -3.43   12.17
  -5  -6  -7   12.49   11.17
  -5  -6  -7   13.13   14.25
   5  -6   7    8.00   21.57
  -5   6  -8    3.07   27.05
   5   6   8   22.04   19.91
  -5  -6  -8    2.22   16.34
  -5  -6  -8    8.24   14.61
   5  -6   8   16.11   14.56
  -5   6  -9   49.66   20.32
   5   6   9   26.36   13.59
  -5  -6  -9   58.05   12.75
  -5  -6  -9   33.58   26.19
   5  -6   9   37.60   23.94
   5   6  10   21.00   16.93
  -5   6 -10    4.71   16.98
   5  -6  10   -4.22   14.13
  -5  -6 -10  -20.71   15.34
  -5   6 -11   51.89   32.59
   5   6  11   46.31   14.14
  -5  -6 -11  104.09   20.84
  -5  -6 -11   56.60   28.48
   5  -6  11   57.34   25.31
   5   6  12    5.88   15.77
  -5   6 -12   -9.55   18.23
   5  -6  12   -9.55   13.69
  -5  -6 -12   11.06    9.82
  -5  -6 -12   -6.70   23.08
   5   6  13    3.49   10.94
  -5   6 -13    9.83   19.18
   5  -6  13   35.68   19.51
  -5  -6 -13    1.62   10.41
  -5  -6 -13   -4.32   15.82
  -5   6 -14   46.90   33.44
  -5  -6 -14   36.37   18.19
   5  -6  14   29.05   15.18
  -5  -6 -14   45.80   18.10
  -5   6 -15  -23.76   31.63
  -5  -6 -15    4.31    9.33
   5  -6  15  -11.65   20.03
  -5  -6 -15   -9.39   25.30
  -5   6 -16   96.84   26.30
  -5  -6 -16   77.11   12.72
   5  -6  16   54.34   16.30
  -5  -6 -16   48.03   21.25
  -5   7  10   26.44   19.91
   5   7 -10   82.78   23.30
  -5  -7  10   59.03   18.23
  -5  -7  10   42.15   24.20
   5  -7 -10   54.74   27.04
  -5   7   9   34.07   19.74
   5   7  -9    6.97   30.59
  -5  -7   9   25.04   16.52
  -5  -7   9   20.24   16.10
   5  -7  -9    7.95   35.22
  -5   7   8   56.70   21.47
   5   7  -8   76.15   22.01
  -5  -7   8   62.09   18.95
  -5  -7   8   49.11   18.41
   5  -7  -8   81.56   25.40
  -5   7   7   14.25   28.16
   5   7  -7  -19.57   27.60
  -5  -7   7    9.19   14.27
  -5  -7   7   -8.96   22.69
   5  -7  -7    4.53   20.44
  -5   7   6  -12.00   18.00
   5   7  -6  -14.10   17.12
  -5  -7   6    9.79   14.36
  -5  -7   6    1.72   14.45
   5  -7  -6   -5.72   30.06
  -5   7   5   22.28   32.49
   5   7  -5   55.15   20.51
  -5  -7   5   61.79   17.52
  -5  -7   5   33.58   28.08
   5  -7  -5   71.27   24.72
  -5   7   4   81.12   23.94
   5   7  -4   71.11   32.42
  -5  -7   4   79.23   17.92
  -5  -7   4   57.86   20.20
   5  -7  -4   83.02   25.73
  -5   7   3   93.86   21.94
   5   7  -3   53.73   20.63
  -5  -7   3   35.86   17.14
  -5  -7   3   48.07   27.44
   5  -7  -3   43.36   22.78
  -5   7   2    5.91   18.53
   5   7  -2   17.51   25.07
  -5  -7   2    9.76   13.92
  -5  -7   2  -12.38   15.51
   5  -7  -2   -1.28   19.67
  -5   7   1   36.40   20.42
   5   7  -1   24.96   17.75
  -5  -7   1   32.75   14.84
  -5  -7   1   16.12   17.07
   5  -7  -1   37.98   32.45
  -5   7   0   49.63   28.38
   5   7   0   -3.53   25.18
  -5  -7   0  -11.77   13.51
  -5  -7   0   -3.66   16.16
   5  -7   0   -8.18   17.76
  -5   7  -1   40.36   19.95
   5   7   1   22.12   16.66
  -5  -7  -1    1.87   21.82
  -5  -7  -1   10.09   17.13
   5  -7   1   -0.38   19.96
  -5   7  -2   31.77   23.44
   5   7   2  154.84   32.16
  -5  -7  -2   32.10   24.90
  -5  -7  -2  137.97   34.02
   5  -7   2  104.73   24.69
  -5   7  -3  154.76   31.51
   5   7   3  197.07   26.81
  -5  -7  -3  165.45   31.15
  -5  -7  -3  209.81   29.77
   5  -7   3  192.71   29.54
  -5   7  -4  134.03   31.73
   5   7   4  192.73   39.38
  -5  -7  -4  178.48   20.18
  -5  -7  -4  152.13   42.31
   5  -7   4  195.15   40.92
  -5   7  -5   62.80   41.41
   5   7   5  163.88   22.56
  -5  -7  -5   68.54   17.69
  -5  -7  -5  115.62   25.37
   5  -7   5  126.43   26.85
  -5   7  -6  139.86   30.13
   5   7   6  172.58   36.14
  -5  -7  -6  186.77   21.59
  -5  -7  -6  165.30   28.41
   5  -7   6  125.90   42.52
  -5   7  -7   32.63   22.16
   5   7   7   21.74   15.73
  -5  -7  -7   -6.85   21.47
  -5  -7  -7    8.37   29.71
   5  -7   7   13.56   18.63
  -5   7  -8   37.74   33.62
   5   7   8   33.68   25.74
  -5  -7  -8   38.34   21.51
  -5  -7  -8   22.92   19.38
   5  -7   8   11.31   29.61
  -5   7  -9  -25.69   20.32
   5   7   9    0.40   14.17
  -5  -7  -9   -3.60   12.75
  -5  -7  -9    4.72   16.79
   5  -7   9   14.15   16.52
   6   0 -28   45.03   13.97
   6   0 -28   47.00   16.54
   6   0 -27  -10.32   11.78
   6   0 -27   -5.67   13.25
   6   0 -26    0.78   16.71
   6   0 -25   19.01   14.00
   6   0 -24   10.72    8.73
   6   0 -23    1.69    7.73
   6   0 -22   -2.25    7.59
   6   0 -21    4.73   11.02
   6   0 -20   -4.28    9.29
   6   0 -19   -1.10    5.80
   6   0 -18   45.48    6.65
   6   0 -17   -1.77    5.13
   6   0 -16   28.43    8.65
   6   0 -15   -0.46    4.37
   6   0 -15   -5.99    6.47
   6   0 -14   -1.45    4.18
   6   0 -14    1.05    3.77
   6   0 -13   -2.71    4.06
   6   0 -13   -0.82    3.61
   6   0 -12   40.21    3.30
   6   0 -12   42.84    4.15
   6   0 -11    7.54    3.99
   6   0 -11    0.78    4.92
   6   0 -10 3296.77  103.37
   6   0 -10 3048.88   94.01
   6   0  -9    0.71    4.08
   6   0  -9   -2.35    2.55
   6   0  -8  212.87    5.88
   6   0  -8  211.58    5.57
   6   0  -7   -0.22    3.85
   6   0  -7    2.80    3.13
   6   0  -6  110.18    4.35
   6   0  -6  107.01    4.30
   6   0  -6  112.86    4.80
   6   0  -5   -3.29    4.12
   6   0  -5   -0.05    1.53
   6   0  -5    2.18    4.35
   6   0  -4  134.46    4.65
   6   0  -4  142.50    3.88
   6   0  -4  151.27    6.87
   6   0  -3    1.03    2.59
   6   0  -3   -0.53    1.66
   6   0  -3    0.32    2.31
   6   0  -2  609.11   16.45
   6   0  -2  620.54   13.84
   6   0  -1   -2.13    2.80
   6   0  -1    0.19    2.34
   6   0   0 1045.58   23.60
   6   0   0 1009.56   18.44
   6   0   1    3.67    2.87
   6   0   1    1.68    0.96
  -6   0  -1    0.33    1.27
   6   0   2  138.04    5.16
  -6   0  -2  135.19    3.29
   6   0   3    0.93    2.93
   6   0   3    0.63    1.05
  -6   0  -3    1.19    2.37
   6   0   4  512.35   12.12
   6   0   4  536.61    8.44
  -6   0  -4  512.98   11.50
   6   0   5   -6.15    2.96
   6   0   5    1.97    1.61
  -6   0  -5   -0.34    3.19
   6   0   6   41.81    3.66
   6   0   6   36.61    2.56
  -6   0  -6   37.04    3.03
   6   0   7    0.96    2.98
   6   0   7    1.78    2.34
  -6   0  -7    3.19    2.67
   6   0   8   -2.66    2.92
   6   0   8   -0.97    1.75
  -6   0  -8    9.85    4.62
   6   0   9   -4.66    3.02
   6   0   9    0.52    2.00
  -6   0  -9   -0.85    3.14
   6   0  10  131.15    7.25
  -6   0 -10  122.93    6.02
   6   0  11   -3.66    4.78
  -6   0 -11    2.77    6.17
   6   0  12   81.96    4.51
  -6   0 -12   77.72    7.81
   6   0  13    3.93    3.11
  -6   0 -13   -3.50    6.71
   6   0  14   79.72    6.31
  -6   0 -14   76.24    6.39
   6   0  15    6.36    5.29
  -6   0 -15    4.03    5.23
   6   0  16  280.12    8.48
  -6   0 -16  249.72   11.84
   6   0  17    9.99    5.40
  -6   0 -17   -9.20    8.95
   6   0  18   45.12    4.34
  -6   0 -18   22.47   11.18
   6   0  19    3.11    5.59
  -6   0 -19   18.29   10.76
   6   0  20  901.37   29.92
  -6   0 -20  949.04   46.42
   6   0  21    1.13    5.94
  -6   0 -21   13.20   12.91
   6   0  22  446.14   14.47
  -6   0 -22  485.84   23.77
   6   0  23   -1.16    6.16
  -6   0 -23   13.39    9.49
   6   0  24   56.06    5.70
  -6   0 -24   47.91   12.27
  -6   0 -25   14.48   11.17
  -6   0 -26    4.85   11.12
  -6   0 -27   -3.27   17.86
   6   1 -28   26.73   24.10
   6  -1 -28   22.69   17.77
   6  -1 -28   11.47   25.56
   6   1 -27   23.78   19.43
   6  -1 -27    8.77    9.49
   6  -1 -27   -5.34   22.97
   6   1 -26   75.23   23.38
   6  -1 -26   83.05   11.71
   6  -1 -26   95.81   18.24
   6   1 -25   11.11   11.83
   6  -1 -25   23.21    8.81
   6  -1 -25   -0.93   14.12
   6   1 -24    4.74   10.29
   6  -1 -24    2.09   11.40
   6  -1 -24  -10.97   12.22
   6   1 -23   45.45   12.10
   6  -1 -23   57.75    8.73
   6  -1 -23   68.97   14.89
   6   1 -22   27.56   10.17
   6  -1 -22   15.22    7.12
   6  -1 -22   11.06   12.29
   6   1 -21   76.33   11.87
   6  -1 -21   88.74    8.46
   6  -1 -21   87.44   14.22
   6   1 -20   -1.06   13.42
   6  -1 -20   16.54    8.70
   6  -1 -20   12.02   10.40
   6   1 -19    3.43   12.48
   6  -1 -19    9.85    5.68
   6  -1 -19   17.24   10.18
   6   1 -18    0.98   10.24
   6  -1 -18   -0.49    5.08
   6  -1 -18    8.32    9.21
   6   1 -17  238.66   17.61
   6  -1 -17  250.32   14.17
   6  -1 -17  251.77    6.48
   6  -1 -17  229.17   17.47
   6   1 -16    0.57    5.84
   6  -1 -16    1.31    4.63
   6  -1 -16   -2.00    2.90
   6  -1 -16    5.00    8.77
  -6  -1  16   -2.99    2.01
   6   1 -15  375.98   14.23
   6  -1 -15  391.46   12.24
   6  -1 -15  381.02    7.83
   6  -1 -15  382.91   19.75
  -6  -1  15  349.43    9.55
   6   1 -14   31.90    5.79
   6  -1 -14   17.69    7.28
   6  -1 -14   29.61    3.32
   6  -1 -14   26.50    8.75
  -6  -1  14   27.52    2.58
   6   1 -13    4.25    4.74
   6  -1 -13   -2.24    3.87
   6  -1 -13   -1.66    2.95
   6  -1 -13   -0.12   10.82
  -6  -1  13    2.49    3.36
   6   1 -12    9.12    4.47
   6  -1 -12    6.10    3.13
   6  -1 -12    2.56   11.69
  -6  -1  12    9.52    3.82
   6   1 -11  258.00   12.37
   6   1 -11  281.66   11.97
   6  -1 -11  263.79    5.84
   6  -1 -11  260.52   13.15
  -6  -1  11  255.44    6.66
  -6  -1  11  273.47    7.54
   6   1 -10    2.95    3.99
   6   1 -10   -4.16    5.49
   6  -1 -10    2.93    2.01
   6  -1 -10   -6.20    5.67
  -6  -1  10    0.10    2.39
  -6  -1  10    3.64    2.76
   6   1  -9  437.08   13.57
   6   1  -9  484.41   16.30
   6  -1  -9  498.04   23.46
  -6  -1   9  450.74   10.36
  -6  -1   9  485.78   10.68
   6   1  -8   43.87    7.36
   6   1  -8   53.90    4.18
   6  -1  -8   43.65    6.62
  -6  -1   8   43.42    4.87
  -6  -1   8   49.80    4.21
   6   1  -7   -1.69    3.92
   6   1  -7    0.23    2.88
   6  -1  -7   -1.63    5.26
  -6  -1   7    4.12    3.92
  -6  -1   7    4.35    3.07
   6   1  -6  250.53   12.12
   6   1  -6  240.32    9.08
   6  -1  -6  220.58   14.32
  -6  -1   6  237.44    8.53
  -6  -1   6  250.74    5.14
   6   1  -5    5.71    3.90
   6   1  -5    0.73    3.68
  -6   1   5   -1.41    3.34
   6  -1  -5    4.37    6.98
  -6  -1   5    2.27    1.52
  -6  -1   5   10.53    4.13
   6   1  -4   75.68    5.38
   6   1  -4   76.12    4.69
  -6   1   4   67.59    4.68
   6  -1  -4   55.09    9.19
  -6  -1   4   76.84    2.84
  -6  -1   4   81.66    5.84
   6   1  -3   -0.92    5.62
   6   1  -3    3.40    2.16
  -6   1   3    2.67    3.44
   6  -1  -3    5.71    4.27
  -6  -1   3    7.19    1.70
  -6  -1   3    5.75    2.97
   6   1  -2    7.71    3.99
   6   1  -2   10.43    2.96
  -6   1   2   -0.67    5.54
  -6  -1   2    7.33    3.32
   6  -1  -2   12.46    6.24
   6   1  -1 2020.48   58.52
   6   1  -1 2052.57   48.24
  -6   1   1 1937.85   56.97
   6  -1  -1 2061.65   64.94
  -6  -1   1 1929.94   38.23
  -6  -1   1 1977.87   52.70
   6   1   0 2917.37   98.63
  -6   1   0 2754.75   93.86
   6   1   0 2867.43   70.35
  -6  -1   0 2852.80   83.74
  -6  -1   0 2665.45   58.57
   6  -1   0 2805.66   95.31
   6   1   1    0.78    6.13
  -6   1  -1   14.69    5.79
  -6  -1  -1   -2.74    5.24
   6  -1   1   13.35    5.56
   6   1   2 2767.80   86.60
  -6   1  -2 2872.24   96.20
   6  -1   2 2758.52   90.74
  -6  -1  -2 2648.55   56.96
  -6  -1  -2 2916.02   88.85
   6   1   3   63.88    5.21
  -6   1  -3   63.11    7.78
   6  -1   3   69.85    6.31
  -6  -1  -3   64.71    1.44
  -6  -1  -3   71.34    4.45
  -6  -1  -3   71.86    3.71
   6   1   4 1663.71   47.45
  -6   1  -4 1631.78   49.66
   6  -1   4 1688.05   46.01
  -6  -1  -4 1730.90   34.19
  -6  -1  -4 1699.52   43.95
  -6  -1  -4 1799.21   42.88
   6   1   5  378.90   11.32
  -6   1  -5  368.19   14.96
   6  -1   5  353.67   11.86
  -6  -1  -5  369.10    6.42
  -6  -1  -5  373.85   12.67
  -6  -1  -5  398.61   10.38
   6   1   6 2153.18   64.59
  -6   1  -6 2040.13   71.10
   6  -1   6 2125.72   63.68
  -6  -1  -6 2194.29   51.57
  -6  -1  -6 2164.32   59.06
  -6  -1  -6 2232.44   59.62
   6   1   7  838.18   22.53
  -6   1  -7  801.94   28.62
   6  -1   7  859.61   23.21
  -6  -1  -7  875.30   18.08
  -6  -1  -7  868.70   20.44
  -6  -1  -7  889.13   20.75
   6   1   8  517.89   14.43
  -6   1  -8  522.12   20.36
  -6  -1  -8  509.31    9.93
   6  -1   8  496.55   14.04
  -6  -1  -8  525.41   15.46
   6   1   9  260.92    8.94
  -6   1  -9  266.97   10.84
  -6  -1  -9  267.68    6.02
   6  -1   9  284.46   10.14
  -6  -1  -9  286.48    8.77
   6   1  10    1.19    5.54
  -6   1 -10    6.57    7.53
  -6  -1 -10   -0.19    3.43
   6  -1  10    4.64    2.95
  -6  -1 -10   -0.61    5.68
   6   1  11   33.60    6.50
  -6   1 -11   34.51    6.40
  -6  -1 -11   39.42    4.99
   6  -1  11   31.24    5.33
  -6  -1 -11   38.55    4.97
   6   1  12   37.66    7.02
  -6   1 -12   10.27   10.37
  -6  -1 -12   28.68    3.52
   6  -1  12   27.41    3.72
  -6  -1 -12   23.14    5.36
   6   1  13   -1.44    4.06
  -6   1 -13    0.03    9.06
  -6  -1 -13    8.87    3.17
   6  -1  13    2.52    3.36
  -6  -1 -13    3.49    4.93
   6   1  14   33.21    4.92
  -6   1 -14   49.46    7.73
  -6  -1 -14   39.70    4.33
   6  -1  14   41.83    4.36
  -6  -1 -14   41.27    6.51
   6   1  15   -4.27    6.13
  -6   1 -15    1.12    6.88
  -6  -1 -15    0.78    5.82
   6  -1  15    2.25    5.95
  -6  -1 -15   -6.90    5.79
   6   1  16  141.57   10.89
  -6   1 -16  131.15   11.54
  -6  -1 -16  141.15   10.82
   6  -1  16  156.58    7.21
  -6  -1 -16  156.31    9.92
   6   1  17   29.94    5.30
  -6   1 -17   35.65   13.89
   6  -1  17   30.62    4.36
  -6  -1 -17   35.48    5.59
   6  -1  17   31.44    7.94
  -6  -1 -17   35.08    7.32
   6   1  18  109.45   10.01
  -6   1 -18  141.18   18.51
   6  -1  18  133.99    8.09
  -6  -1 -18  127.85    8.10
   6  -1  18  116.45    7.61
  -6  -1 -18  145.63   10.16
   6   1  19    5.71    4.65
  -6   1 -19   -9.38   13.86
   6  -1  19    0.58    3.58
  -6  -1 -19    9.05    5.41
   6  -1  19    5.53    5.28
  -6  -1 -19    6.13    7.40
   6   1  20   92.25   10.05
  -6   1 -20   94.84   19.17
  -6  -1 -20   93.42   11.88
   6  -1  20   94.59    7.83
  -6  -1 -20  115.72   10.79
   6   1  21   17.62    5.59
  -6   1 -21   25.13   17.00
  -6  -1 -21   14.60   11.65
   6  -1  21   21.99    3.95
  -6  -1 -21   16.99    9.02
   6   1  22   16.33    8.13
  -6   1 -22    4.14   17.08
  -6  -1 -22   15.66    7.83
   6  -1  22   11.81    5.65
  -6  -1 -22   22.45    9.08
   6   1  23   12.56    5.55
  -6   1 -23   29.09   18.39
  -6  -1 -23   22.51    8.36
   6  -1  23   17.62    4.22
  -6  -1 -23   33.47   14.75
  -6   1 -24   -6.35   12.29
  -6  -1 -24   13.22    8.65
   6  -1  24   12.20    6.13
  -6  -1 -24    4.46   14.91
  -6   1 -25   -3.05   12.62
  -6  -1 -25    4.74   13.37
  -6  -1 -25    8.80   17.34
  -6   1 -26    5.29   13.13
  -6  -1 -26   -4.99   15.83
  -6  -1 -26    5.01   11.39
  -6   1 -27   -7.54   13.89
  -6  -1 -27   -5.48   10.39
  -6  -1 -27    6.16   12.37
   6   2 -27    3.20   16.84
   6  -2 -27   29.56    9.76
   6  -2 -27   28.27   19.67
   6   2 -26   16.24   13.99
   6  -2 -26   -1.96    8.38
   6  -2 -26   13.70   17.42
   6   2 -25   25.80   15.54
   6  -2 -25   38.44   13.25
   6  -2 -25   55.33   18.52
   6   2 -24    4.04   12.13
   6  -2 -24   -6.66    7.09
   6  -2 -24   22.40   14.59
   6   2 -23   10.47   12.22
   6  -2 -23    5.76    6.98
   6  -2 -23   16.13   14.96
   6   2 -22   62.40   14.00
   6  -2 -22   56.91   12.04
   6  -2 -22   59.58   16.91
   6   2 -21   39.79   11.18
   6  -2 -21    9.78    6.54
   6  -2 -21   -0.38   14.14
  -6  -2  21   12.15    3.90
   6   2 -20   12.40    9.93
   6  -2 -20   -1.76    5.86
   6  -2 -20    1.39   12.88
  -6  -2  20    2.22    2.71
  -6  -2  20   13.60    5.65
   6   2 -19    3.80    9.86
   6  -2 -19   10.71    5.78
   6  -2 -19    6.80    1.65
   6  -2 -19   14.06   12.26
  -6  -2  19   10.22    4.69
  -6  -2  19    3.67    5.52
   6   2 -18  134.62   13.52
   6  -2 -18  120.92    8.66
   6  -2 -18  129.49   16.66
  -6  -2  18  119.45    7.46
  -6  -2  18  144.71   11.67
   6   2 -17 1154.21   45.67
   6  -2 -17 1182.31   55.80
  -6  -2  17 1068.18   35.36
  -6  -2  17 1228.79   41.15
   6   2 -16    4.51    8.46
   6  -2 -16    7.87    3.10
   6  -2 -16   13.26   17.18
  -6  -2  16   15.02    3.85
  -6  -2  16    9.14    5.01
   6   2 -15  184.57   13.00
   6  -2 -15  188.78   26.30
  -6  -2  15  167.60    9.88
  -6  -2  15  190.74    8.15
   6   2 -14  656.42   25.78
   6  -2 -14  655.46   32.51
  -6  -2  14  675.55   24.27
  -6  -2  14  740.08   23.93
   6   2 -13  178.62   15.60
   6  -2 -13  172.66   15.76
  -6  -2  13  182.91    7.99
  -6  -2  13  188.39    7.51
   6   2 -12   32.11   10.78
   6  -2 -12   43.89    9.99
  -6  -2  12   24.07    4.54
  -6  -2  12   28.10    6.06
   6   2 -11  112.74    8.45
   6  -2 -11   93.83   18.15
  -6  -2  11   94.99    6.13
  -6  -2  11  113.14    5.32
   6   2 -10    9.97    5.41
   6  -2 -10   -4.41    8.05
  -6  -2  10    1.01    5.85
  -6  -2  10    3.16    3.03
   6   2  -9    4.23    8.45
   6  -2  -9    5.10   12.57
  -6  -2   9    6.57    6.32
  -6  -2   9   11.57    4.98
   6   2  -8  147.37    7.92
  -6   2   8  114.65    8.10
   6  -2  -8  118.81   11.21
  -6  -2   8  137.86    4.99
  -6  -2   8  128.71    9.41
   6   2  -7   15.25    5.02
  -6   2   7   14.37    5.79
   6  -2  -7   10.54    7.32
  -6  -2   7   17.93    3.10
  -6  -2   7   17.33    6.53
   6   2  -6  127.94    8.24
   6   2  -6   94.68   10.32
  -6   2   6  120.20    8.40
   6  -2  -6  110.83   13.78
  -6  -2   6  114.26    6.05
  -6  -2   6   97.37    8.91
   6   2  -5  108.01   12.61
   6   2  -5  102.12    9.68
  -6   2   5  110.91    8.22
   6  -2  -5  100.10    9.06
  -6  -2   5  110.67    4.55
  -6  -2   5  111.56    9.10
   6   2  -4  365.09   14.52
   6   2  -4  402.65   16.34
  -6   2   4  396.27   20.45
   6  -2  -4  358.41   16.34
  -6  -2   4  404.04    9.69
  -6  -2   4  373.59   15.43
   6   2  -3   -2.77    5.64
   6   2  -3   -5.29    3.79
  -6   2   3   -8.94    9.29
   6  -2  -3    7.78    5.97
  -6  -2   3    3.97    2.65
  -6  -2   3    2.77    4.17
   6   2  -2 1349.09   42.84
   6   2  -2 1312.54   36.66
  -6   2   2 1278.76   42.30
   6  -2  -2 1226.00   52.13
  -6  -2   2 1273.03   31.55
  -6  -2   2 1313.50   37.01
   6   2  -1 1375.23   50.05
  -6   2   1 1360.72   45.77
   6   2  -1 1379.17   41.24
  -6  -2   1 1419.65   40.85
  -6  -2   1 1464.83   40.21
   6  -2  -1 1294.78   54.83
   6   2   0  231.34   11.45
  -6   2   0  214.07   11.20
   6   2   0  225.94    7.48
  -6  -2   0  249.58    9.59
  -6  -2   0  245.35    8.92
   6  -2   0  215.88   11.35
   6   2   1  403.04   15.58
  -6   2  -1  359.91   15.08
   6   2   1  386.01   10.62
  -6  -2  -1  426.08   16.77
  -6  -2  -1  412.08   11.05
   6  -2   1  370.45   15.15
   6   2   2  766.69   24.77
  -6   2  -2  730.14   25.26
   6   2   2  730.64   21.23
  -6  -2  -2  720.67   24.11
  -6  -2  -2  732.62   19.56
   6  -2   2  741.30   25.22
   6   2   3  576.93   20.18
  -6   2  -3  604.15   27.90
   6   2   3  565.22   13.82
  -6  -2  -3  560.58   16.23
  -6  -2  -3  574.44   16.29
   6  -2   3  522.47   24.65
   6   2   4  544.76   18.96
   6   2   4  524.82   14.81
  -6   2  -4  508.05   25.91
   6  -2   4  515.66   23.33
  -6  -2  -4  550.55   15.61
  -6  -2  -4  583.43   19.13
   6   2   5   28.05    9.21
   6   2   5   16.84    3.04
  -6   2  -5   14.87   10.57
   6  -2   5   26.46    5.32
  -6  -2  -5   26.16    6.45
  -6  -2  -5   19.06    6.78
   6   2   6   23.52    9.23
  -6   2  -6   29.62   10.57
  -6  -2  -6   27.88    4.42
   6  -2   6   21.00    5.35
  -6  -2  -6   33.91    7.00
   6   2   7   50.03    9.83
  -6   2  -7   58.63    7.74
  -6  -2  -7   53.94    4.87
   6  -2   7   41.66    5.80
  -6  -2  -7   50.18    5.55
   6   2   8  253.73   11.24
  -6   2  -8  232.97   13.57
  -6  -2  -8  246.69   11.02
   6  -2   8  240.53   13.60
  -6  -2  -8  240.88   14.01
   6   2   9   71.51    6.91
  -6   2  -9   52.82   13.09
  -6  -2  -9   67.21    5.01
   6  -2   9   78.54   10.00
  -6  -2  -9   59.21    9.90
   6   2  10  332.04   13.63
  -6   2 -10  311.27   16.47
  -6  -2 -10  336.40   13.73
   6  -2  10  340.24   12.75
  -6  -2 -10  349.27   13.90
   6   2  11   27.48    5.95
  -6   2 -11   35.37   12.59
   6  -2  11   31.03    5.55
  -6  -2 -11   31.40    3.35
  -6  -2 -11   27.26    4.30
  -6  -2 -11   34.93   10.04
   6   2  12    0.67    5.28
  -6   2 -12   -0.69    7.47
   6  -2  12    0.40    6.79
  -6  -2 -12   -7.21    4.65
  -6  -2 -12    7.09    5.73
  -6  -2 -12  -11.02    6.50
   6   2  13  282.47   16.91
  -6   2 -13  280.44   17.52
   6  -2  13  306.99   11.80
  -6  -2 -13  295.11    8.98
  -6  -2 -13  301.65    9.69
  -6  -2 -13  300.33   21.30
   6   2  14  295.56   17.59
  -6   2 -14  280.55   25.43
  -6  -2 -14  287.70   11.72
   6  -2  14  295.37   11.34
  -6  -2 -14  290.42   15.69
   6   2  15  306.12   13.86
  -6   2 -15  292.45   18.67
  -6  -2 -15  304.19   10.10
   6  -2  15  320.34   12.21
  -6  -2 -15  291.83   16.68
   6   2  16    2.54    5.76
  -6   2 -16    1.52    9.50
  -6  -2 -16    2.40    3.91
   6  -2  16   11.63    4.88
  -6  -2 -16   14.23    7.79
   6   2  17   88.87   12.37
  -6   2 -17   93.57   13.61
  -6  -2 -17   94.30    8.74
   6  -2  17  119.95    7.60
  -6  -2 -17  103.05   11.55
   6   2  18   10.83    9.60
  -6   2 -18   -6.47   10.87
  -6  -2 -18    9.56    4.53
   6  -2  18    8.60    7.89
  -6  -2 -18   19.74   13.91
   6   2  19    8.27    6.39
  -6   2 -19   -2.20   17.28
  -6  -2 -19    9.44    4.97
   6  -2  19   10.58    5.44
  -6  -2 -19   21.17   14.63
  -6   2 -20  226.89   29.59
  -6  -2 -20  200.40   14.25
   6  -2  20  266.85   16.23
  -6  -2 -20  236.46   25.99
  -6   2 -21    8.17   18.19
  -6  -2 -21   -3.60    5.93
   6  -2  21   10.19    5.78
  -6  -2 -21   11.92   14.35
  -6   2 -22   -1.03   18.68
  -6  -2 -22    3.30    6.29
   6  -2  22    5.19    5.97
  -6  -2 -22   -3.02   15.18
  -6   2 -23   73.38   22.63
   6  -2  23   44.26    5.35
  -6  -2 -23   33.63   11.91
   6  -2  23   43.68   11.96
  -6  -2 -23   39.97   20.54
  -6   2 -24   18.11   21.23
   6  -2  24   15.10    6.65
  -6  -2 -24    6.57   12.07
   6  -2  24   -4.65    7.20
  -6  -2 -24   15.27   19.02
  -6   2 -25    7.43   22.04
   6  -2  25    4.53    4.00
  -6  -2 -25   -2.87    8.01
   6  -2  25    5.44    7.23
  -6  -2 -25   13.68   19.65
  -6   2 -26    4.42   22.22
  -6  -2 -26   -1.81    8.14
  -6  -2 -26   -0.38   20.21
   6   3 -26   59.68   20.96
   6  -3 -26   63.95   16.38
   6  -3 -26   73.62   36.97
   6   3 -25   40.46   18.62
   6  -3 -25   36.39    9.34
   6  -3 -25   12.63   33.74
  -6  -3  25   39.49    9.18
   6   3 -24    3.48   14.39
   6  -3 -24    4.43    7.42
   6  -3 -24   -1.91   28.07
  -6  -3  24   -0.69    7.31
   6   3 -23   -3.83   14.09
   6  -3 -23   11.07   10.85
   6  -3 -23   -5.89   26.17
  -6  -3  23    0.54    5.82
  -6  -3  23    6.60    6.69
   6   3 -22   34.43   15.02
   6  -3 -22   17.76    8.07
   6  -3 -22   28.79   27.00
  -6  -3  22   18.55    5.15
  -6  -3  22   40.72   10.98
   6   3 -21   26.73   13.58
   6  -3 -21   14.21    7.25
   6  -3 -21    3.77   16.46
  -6  -3  21   13.10    7.68
  -6  -3  21   13.20    6.35
   6   3 -20   10.07   12.00
   6  -3 -20    2.75    2.28
   6  -3 -20   -5.21   14.84
  -6  -3  20    5.29    5.33
  -6  -3  20   -1.46    5.83
   6   3 -19   30.09   12.27
   6  -3 -19    0.57   15.25
  -6  -3  19   13.48    9.18
  -6  -3  19   14.31    9.33
   6   3 -18   25.28   11.40
   6  -3 -18   27.17   14.47
  -6  -3  18   15.74   10.24
  -6  -3  18   16.47    5.86
   6   3 -17   27.13   11.93
   6  -3 -17   23.05   14.45
  -6  -3  17   37.36    7.37
  -6  -3  17   45.45    6.20
   6   3 -16  198.94   24.50
   6  -3 -16  182.86   29.98
  -6  -3  16  204.43   11.96
  -6  -3  16  229.42   13.87
   6   3 -15  308.61   28.82
   6  -3 -15  292.35   24.57
  -6  -3  15  324.10   19.16
  -6  -3  15  323.54   12.23
   6   3 -14   52.00   11.88
   6  -3 -14   44.69   14.67
  -6  -3  14   79.15   12.74
  -6  -3  14   62.14    9.23
   6   3 -13 1439.41   63.06
   6  -3 -13 1481.55   71.78
  -6  -3  13 1543.27   56.52
  -6  -3  13 1587.19   50.10
   6   3 -12  444.25   30.21
   6  -3 -12  452.77   39.82
  -6  -3  12  470.91   19.60
  -6  -3  12  471.49   19.67
   6   3 -11  643.18   29.47
  -6   3  11  631.17   27.18
   6  -3 -11  637.79   34.31
  -6  -3  11  686.16   21.32
  -6  -3  11  649.48   24.57
   6   3 -10  974.29   39.29
  -6   3  10  981.98   49.04
   6  -3 -10  971.95   56.44
  -6  -3  10  974.27   33.90
  -6  -3  10  994.84   34.88
   6   3  -9  232.87   14.87
  -6   3   9  203.39   15.18
   6  -3  -9  223.36   17.85
  -6  -3   9  262.83   10.50
  -6  -3   9  242.08   12.42
   6   3  -8   25.77    7.85
  -6   3   8   27.19    8.67
   6  -3  -8   28.25   15.56
  -6  -3   8   42.26    8.14
  -6  -3   8   20.07    6.86
   6   3  -7   93.79    9.69
  -6   3   7   72.67   17.28
   6  -3  -7   83.80   12.19
  -6  -3   7   93.69    6.48
  -6  -3   7   92.38    8.28
   6   3  -6  485.84   27.41
  -6   3   6  485.21   23.31
   6  -3  -6  502.10   33.42
  -6  -3   6  549.91   17.56
  -6  -3   6  534.38   19.83
   6   3  -5   62.03   12.19
  -6   3   5   68.29   10.18
   6  -3  -5   57.36   10.89
  -6  -3   5   61.47    9.25
  -6  -3   5   58.04    7.76
   6   3  -4  409.53   22.76
  -6   3   4  410.73   20.07
  -6  -3   4  450.48   17.28
   6  -3  -4  420.68   21.37
   6   3  -3   48.55   11.41
  -6   3   3   52.88   15.91
   6  -3  -3   56.90   10.15
  -6  -3   3   46.22    8.64
  -6  -3   3   68.01    7.46
   6   3  -2   13.66    9.16
  -6  -3   2    4.02    6.47
  -6  -3   2   26.33    7.85
  -6   3   1  484.52   21.97
   6   3  -1  484.74   18.18
  -6  -3   1  537.39   19.60
  -6  -3   1  446.82   22.37
   6  -3  -1  496.83   33.03
   6   3   0   92.41    8.20
  -6   3   0   85.73   11.09
   6  -3   0   93.04   11.63
  -6  -3   0   95.59   11.38
  -6   3  -1  662.01   28.81
   6   3   1  680.62   28.48
  -6  -3  -1  698.56   29.06
  -6  -3  -1  750.29   31.04
   6  -3   1  679.00   28.57
   6   3   2  806.10   32.37
  -6   3  -2  791.34   33.54
   6  -3   2  838.08   34.03
  -6  -3  -2  827.58   27.42
   6   3   3   12.75    5.73
   6  -3   3   24.49    7.85
  -6  -3  -3   26.36    6.09
  -6  -3  -3   15.95    6.14
  -6   3  -4    9.64   12.93
   6   3   4    9.96    5.40
  -6  -3  -4    4.80    5.69
  -6  -3  -4    9.16    6.06
   6  -3   4   -0.02    7.19
  -6   3  -5    1.99    7.87
   6   3   5  -13.37    8.37
  -6  -3  -5    1.81    7.83
  -6  -3  -5    9.50    5.88
   6  -3   5   -2.73    6.78
   6   3   6  421.23   20.37
  -6   3  -6  419.99   22.37
   6  -3   6  401.91   23.97
  -6  -3  -6  419.24   15.76
  -6  -3  -6  422.38   19.46
   6   3   7   -9.94    7.96
  -6   3  -7    6.16   13.65
   6  -3   7   -0.57   11.22
  -6  -3  -7   -3.79    5.30
  -6  -3  -7    2.59    6.23
   6   3   8  195.59    9.54
  -6   3  -8  176.86   14.90
   6  -3   8  173.67   12.24
  -6  -3  -8  183.79   12.63
  -6  -3  -8  198.33   16.98
  -6   3  -9   32.97   15.21
  -6  -3  -9   34.32    5.79
   6  -3   9   32.27    7.96
  -6  -3  -9   46.48   12.42
  -6   3 -10    4.28    9.45
  -6  -3 -10   12.85    7.77
   6  -3  10    9.99   10.51
  -6  -3 -10    7.94    7.22
  -6   3 -11  118.85   19.84
  -6  -3 -11  112.48    7.51
   6  -3  11  119.89   10.49
  -6  -3 -11  108.07   16.26
  -6   3 -12   -2.32    9.97
  -6  -3 -12    6.49    4.77
   6  -3  12   -0.96    6.82
  -6  -3 -12   10.75    7.93
  -6   3 -13  124.37   15.71
  -6  -3 -13  135.34   10.03
   6  -3  13  151.24   16.08
  -6  -3 -13  125.53   18.28
   6  -3  14   37.93    7.77
  -6  -3 -14   30.02    4.96
  -6  -3 -14   42.63    9.79
  -6   3 -15   39.42   12.87
  -6  -3 -15   45.51    7.74
   6  -3  15   37.76   11.12
  -6  -3 -15   43.21   10.59
  -6   3 -16  -20.35   11.12
   6  -3  16    3.19    6.37
  -6  -3 -16   -0.23    4.19
  -6  -3 -16   -3.63    4.10
  -6  -3 -16   17.39   14.77
  -6   3 -17   -5.63   11.99
   6  -3  17   -5.87    9.37
  -6  -3 -17    7.60    6.77
  -6  -3 -17    0.09    3.87
  -6  -3 -17   -0.23   14.37
  -6   3 -18   90.24   24.35
  -6  -3 -18   69.04    6.38
   6  -3  18   69.63    8.62
  -6  -3 -18   63.55   13.44
  -6   3 -19   16.29   20.44
  -6  -3 -19    9.69    7.65
   6  -3  19   -3.66    9.85
  -6  -3 -19    8.92   11.00
  -6   3 -20   45.50   21.99
  -6  -3 -20   16.15    5.57
   6  -3  20    4.93    7.09
  -6  -3 -20   12.06   12.01
  -6   3 -21   28.64   15.70
  -6  -3 -21   23.09    6.34
   6  -3  21   37.34   12.20
  -6  -3 -21   36.34   13.22
  -6   3 -22   10.41   17.71
  -6  -3 -22   48.20   11.42
   6  -3  22   42.03    8.42
  -6  -3 -22   52.94   22.49
  -6   3 -23   42.37   17.72
  -6  -3 -23   37.27    7.78
   6  -3  23   27.68    8.62
  -6  -3 -23   39.22   23.32
  -6   3 -24   47.93   19.09
  -6  -3 -24   31.87    7.97
   6  -3  24   49.75   13.48
  -6  -3 -24   27.11   24.88
   6   4 -24  243.33   46.41
   6   4 -23    2.43   25.75
   6  -4 -23   13.66   19.17
  -6  -4  23    0.39    7.32
  -6  -4  23   -5.88   11.09
   6   4 -22   31.91   16.94
   6  -4 -22   -4.43   29.98
  -6  -4  22    6.48   14.20
  -6  -4  22   10.27    7.64
   6   4 -21  161.65   23.59
   6  -4 -21  130.86   38.05
  -6  -4  21  150.65   14.75
  -6  -4  21  160.11   11.51
   6   4 -20   10.34   15.04
   6  -4 -20    8.05   27.32
  -6  -4  20    9.07   13.86
  -6  -4  20   11.52   10.35
   6   4 -19   97.83   17.98
   6  -4 -19  125.29   21.31
  -6  -4  19   68.30   18.90
  -6  -4  19   71.19    9.02
   6   4 -18   80.57   17.08
   6  -4 -18   97.50   20.33
  -6  -4  18   84.27   12.28
  -6  -4  18   70.60    8.57
   6   4 -17   18.94   21.34
   6  -4 -17   11.61   16.86
  -6  -4  17   22.30    9.83
  -6  -4  17   24.23   10.98
   6   4 -16  233.44   32.30
   6  -4 -16  236.86   26.07
  -6  -4  16  231.94   16.13
  -6  -4  16  219.30   12.68
   6   4 -15  287.46   24.36
   6  -4 -15  293.11   41.73
  -6  -4  15  323.76   24.58
  -6  -4  15  305.86   18.85
   6   4 -14   26.58   12.88
   6  -4 -14   47.83   15.66
  -6  -4  14   39.62   14.66
  -6  -4  14   24.01    6.98
   6   4 -13   74.40   20.83
  -6   4  13   65.55   11.69
   6  -4 -13   75.08   17.16
  -6  -4  13   62.25    7.76
  -6  -4  13   67.52   10.79
   6   4 -12   14.73   12.47
  -6   4  12   28.32   15.39
   6  -4 -12   29.88   22.26
  -6  -4  12   34.05    7.26
  -6  -4  12   27.87    9.17
   6   4 -11   -2.95   11.00
  -6   4  11   -3.27    9.76
   6  -4 -11   14.59   12.68
  -6  -4  11   14.14    6.42
  -6  -4  11   15.70    8.11
   6   4 -10  462.50   37.44
  -6   4  10  471.61   38.82
   6  -4 -10  519.79   32.43
  -6  -4  10  565.92   22.07
  -6  -4  10  508.87   23.72
   6   4  -9  165.82   16.20
  -6   4   9  154.67   16.55
   6  -4  -9  146.16   28.33
  -6  -4   9  167.14   15.62
  -6  -4   9  186.73   13.22
   6   4  -8   97.89   19.60
  -6   4   8   90.51   14.45
   6  -4  -8   78.71   15.95
  -6  -4   8   96.69    9.42
  -6  -4   8  102.30   10.73
   6   4  -7   35.10   10.73
  -6   4   7   22.40   17.88
   6  -4  -7   10.70   20.98
  -6  -4   7   39.68   12.26
  -6  -4   7   45.22    8.99
   6   4  -6   43.88   10.95
  -6   4   6   46.31   12.68
   6  -4  -6   47.73   13.53
  -6  -4   6   55.81    8.17
  -6  -4   6   49.76    9.23
   6   4  -5    5.04   13.97
  -6   4   5  -12.25   17.17
   6  -4  -5   22.53   10.96
  -6  -4   5    5.18    6.95
  -6  -4   5   10.52    7.85
  -6   4   4   -5.60    9.78
   6   4  -4   -0.49    8.26
  -6  -4   4   -0.77    7.51
  -6  -4   4  -14.14   10.51
   6  -4  -4   10.74   10.51
  -6   4   3    3.78   10.35
   6   4  -3   11.16    8.72
  -6  -4   3    5.74    8.11
  -6  -4   3    4.95    6.89
   6  -4  -3   16.55   11.03
  -6   4   2   95.54   21.74
   6   4  -2   89.38   10.94
  -6  -4   2   98.23   10.54
  -6  -4   2   81.20    9.98
   6  -4  -2  102.65   21.09
  -6   4   1  101.25   13.97
   6   4  -1   55.49   10.19
  -6  -4   1   52.99   10.11
  -6  -4   1   55.95    9.87
   6  -4  -1  100.15   14.36
  -6   4   0  533.61   29.70
   6   4   0  535.10   32.45
  -6  -4   0  602.98   33.10
  -6  -4   0  577.53   35.54
   6  -4   0  530.26   29.32
  -6   4  -1  566.95   41.42
   6   4   1  473.66   30.80
   6  -4   1  557.75   40.28
  -6  -4  -2    7.92    7.92
  -6  -4  -2   13.60    8.17
  -6   4  -3  349.23   23.83
   6   4   3  388.86   27.13
  -6  -4  -3  405.48   18.90
  -6  -4  -3  378.30   20.64
   6  -4   3  356.36   22.72
   6   4   4   74.34   15.84
   6  -4   4   93.12   12.76
  -6  -4  -4   46.67    9.40
  -6  -4  -4   33.05   10.44
  -6   4  -5  155.71   17.13
   6   4   5  180.54   12.91
  -6  -4  -5  190.07   18.94
  -6  -4  -5  148.85   21.44
   6  -4   5  150.80   23.28
   6   4   6    6.16    7.88
   6  -4   6   15.19    9.97
  -6  -4  -6   13.24    7.46
  -6  -4  -6   10.11   15.94
  -6   4  -7 1074.87   56.44
   6   4   7 1161.04   45.75
  -6  -4  -7 1261.00   47.40
  -6  -4  -7 1188.45   55.57
   6  -4   7 1129.63   51.85
   6   4   8  119.40   17.35
  -6   4  -8  151.00   27.01
   6  -4   8  197.99   22.84
  -6  -4  -8  153.98   12.12
  -6  -4  -8  114.10   22.40
   6   4   9  401.63   25.54
  -6   4  -9  364.01   26.89
   6  -4   9  391.34   22.17
  -6  -4  -9  376.47   22.96
  -6  -4  -9  363.09   24.10
   6   4  10  247.03   13.93
  -6   4 -10  228.57   30.73
   6  -4  10  238.13   24.19
  -6  -4 -10  246.35   13.15
  -6  -4 -10  250.26   18.31
  -6   4 -11   19.27   12.97
  -6  -4 -11   16.64   11.20
   6  -4  11   18.75   10.18
  -6  -4 -11   46.77   15.87
  -6   4 -12   12.12   13.57
  -6  -4 -12   13.00    6.31
   6  -4  12   28.56    9.31
  -6  -4 -12   14.02   10.31
  -6   4 -13   58.20   24.03
  -6  -4 -13   69.16    7.64
   6  -4  13   64.40   17.06
  -6  -4 -13   58.55   12.79
  -6   4 -14   11.55   13.74
  -6  -4 -14   12.43    9.22
   6  -4  14   22.22    9.09
  -6  -4 -14    6.74   16.65
  -6   4 -15   20.07   13.49
  -6  -4 -15    2.11    5.47
   6  -4  15   -7.44   13.51
  -6  -4 -15   -4.10   11.06
  -6   4 -16   23.41   24.51
  -6  -4 -16   20.52    8.78
   6  -4  16   36.60    9.29
  -6  -4 -16   23.26   12.29
  -6   4 -17  103.00   31.07
  -6  -4 -17   96.67    8.09
   6  -4  17   99.30   18.86
  -6  -4 -17  117.67   23.94
  -6   4 -18    8.69   16.12
  -6  -4 -18   15.76    8.14
   6  -4  18    5.52    8.52
  -6  -4 -18    8.74   19.09
  -6   4 -19   22.84   16.31
   6  -4  19    9.54   13.29
  -6  -4 -19   -4.07    6.12
  -6  -4 -19    7.09    5.04
  -6  -4 -19    2.05   12.72
  -6   4 -20   23.97   18.23
   6  -4  20   14.02    8.92
  -6  -4 -20   20.08   10.47
  -6  -4 -20   14.75    5.10
  -6  -4 -20   22.02   14.41
  -6   4 -21    1.14   18.50
  -6  -4 -21    9.08    6.95
   6  -4  21   17.06   13.92
  -6  -4 -21   10.01   15.04
  -6   4 -22   17.03   18.46
  -6  -4 -22    9.00    6.99
   6  -4  22   -6.25    8.23
  -6  -4 -22   11.36   14.84
   6   5 -21    3.18   31.96
   6  -5 -21   41.39   22.75
  -6  -5  21   25.58   22.31
  -6  -5  21   25.49    8.91
   6   5 -20   53.01   21.76
   6  -5 -20   62.89   24.40
  -6  -5  20   49.69   15.78
  -6  -5  20   57.47    9.97
   6   5 -19   18.16   18.23
   6  -5 -19   80.25   31.24
  -6  -5  19    9.98   12.51
  -6  -5  19    7.33   13.45
   6   5 -18    4.21   17.03
   6  -5 -18   18.64   31.30
  -6  -5  18    8.66   18.14
  -6  -5  18   14.60    8.21
   6   5 -17   28.44   17.54
   6  -5 -17   34.20   20.05
  -6  -5  17   20.63   19.25
  -6  -5  17   17.84   12.73
   6   5 -16   -1.51   25.49
   6  -5 -16   27.24   19.27
  -6  -5  16   28.15   12.29
  -6  -5  16   20.43    8.70
   6   5 -15  -15.79   14.87
   6  -5 -15    3.27   17.09
  -6  -5  15   -2.07   10.84
  -6  -5  15   15.23    7.69
   6   5 -14   24.44   15.33
  -6   5  14   10.28   11.91
   6  -5 -14   18.92   26.56
  -6  -5  14   11.75    9.10
  -6  -5  14   28.24   11.43
   6   5 -13   12.27   14.00
  -6   5  13   27.82   19.06
   6  -5 -13    9.37   16.19
  -6  -5  13    0.19    8.47
  -6  -5  13    1.55   10.51
   6   5 -12   17.62   21.52
  -6   5  12   15.90   12.19
   6  -5 -12    7.03   15.92
  -6  -5  12    5.33   13.71
  -6  -5  12    7.77   10.60
   6   5 -11    9.10   12.75
  -6   5  11  -22.16   19.20
   6  -5 -11    0.74   22.80
  -6  -5  11    1.73    8.13
  -6  -5  11  -14.60   14.86
   6   5 -10    4.97   21.68
  -6   5  10   32.76   13.19
   6  -5 -10    7.54   15.89
  -6  -5  10   30.16   14.91
  -6  -5  10   23.04   16.15
   6   5  -9   46.28   15.17
  -6   5   9   55.15   22.91
   6  -5  -9   54.37   17.58
  -6  -5   9   43.44   10.26
  -6  -5   9   41.17   17.10
   6   5  -8   63.28   22.72
  -6   5   8   48.49   14.99
   6  -5  -8   42.35   25.90
  -6  -5   8   48.34   17.24
  -6  -5   8   63.70   17.77
  -6   5   7  -13.72   20.90
   6   5  -7   10.71   12.81
  -6  -5   7   29.29   15.44
  -6  -5   7   22.49    9.65
   6  -5  -7    1.15   15.32
   6   5  -6   41.56   20.00
  -6   5   6   39.51   13.96
   6  -5  -6   31.16   24.45
  -6  -5   6   31.60   10.58
  -6  -5   6   25.99   15.80
  -6   5   5  -37.10   13.72
   6   5  -5   -1.86   11.50
  -6  -5   5   -6.18   14.54
  -6  -5   5    9.33    9.38
   6  -5  -5  -20.76   14.15
  -6   5   4   54.03   15.64
   6   5  -4   77.20   20.30
  -6  -5   4   70.89   17.64
  -6  -5   4   59.07   12.54
   6  -5  -4   76.97   26.12
   6   5  -3   -6.62   11.34
  -6   5   3   20.22   15.58
  -6  -5   3   25.02    9.86
  -6   5   2  370.26   38.99
   6   5  -2  385.94   24.85
  -6  -5   2  380.48   22.16
  -6  -5   2  409.56   24.18
   6  -5  -2  387.94   42.11
   6  -5  -1   24.73   14.88
  -6  -5   1   26.06   10.90
  -6   5   0  253.38   33.72
   6   5   0  288.32   29.49
  -6  -5   0  274.00   19.30
  -6  -5   0  272.11   28.84
   6  -5   0  313.84   36.13
   6   5   1   40.45   11.70
  -6   5  -1   85.05   16.08
  -6  -5  -1   31.69   12.02
  -6  -5  -1   39.76   11.27
   6   5   2   67.95   12.40
  -6   5  -2   57.29   25.35
   6  -5   2   51.78   15.45
  -6  -5  -2   67.32   20.22
  -6   5  -3   96.51   16.54
   6   5   3   73.26   20.15
  -6  -5  -3   99.66   18.97
  -6  -5  -3  100.98   14.85
   6  -5   3   75.98   16.81
  -6   5  -4   -2.12   20.83
   6   5   4   -0.61    9.25
  -6  -5  -4    8.22   13.48
  -6  -5  -4   12.14   11.15
   6  -5   4   -6.23   12.06
  -6   5  -5   32.57   15.26
   6   5   5   42.83   11.09
  -6  -5  -5   39.62   10.90
  -6  -5  -5   37.16   19.54
   6  -5   5   43.98   21.69
  -6   5  -6  102.64   24.51
  -6  -5  -6   12.02   13.51
   6  -5   6   34.50   13.43
  -6   5  -7  267.18   27.79
   6   5   7  318.94   28.84
  -6  -5  -7  341.28   27.64
  -6  -5  -7  288.94   35.55
   6  -5   7  296.83   33.11
  -6   5  -8   16.25   16.18
   6   5   8    7.39    9.65
  -6  -5  -8    2.62   13.32
  -6  -5  -8    3.59   13.05
   6  -5   8   40.57   13.19
  -6   5  -9   21.12   15.77
   6   5   9   17.24   14.95
  -6  -5  -9   37.88    9.47
  -6  -5  -9    5.13   20.86
   6  -5   9   26.14   12.19
  -6   5 -10   31.11   15.75
   6   5  10   32.71    9.83
  -6  -5 -10   16.42    9.51
  -6  -5 -10   17.92   13.26
   6  -5  10   16.62   12.83
  -6   5 -11   -4.71   22.77
   6   5  11    8.12    8.69
  -6  -5 -11   13.04   11.90
  -6  -5 -11    2.29   18.94
   6  -5  11   -0.07   11.56
  -6   5 -12   97.55   20.73
  -6  -5 -12  124.08   11.99
   6  -5  12  111.05   16.31
  -6  -5 -12  108.04   18.49
  -6   5 -13    5.28   15.53
  -6  -5 -13    7.74    7.90
   6  -5  13   -4.95   10.57
  -6  -5 -13   -4.09   12.85
  -6   5 -14   35.23   26.54
  -6  -5 -14    7.17   11.67
   6  -5  14   19.07   18.60
  -6  -5 -14   13.90   19.93
  -6   5 -15   58.57   27.47
  -6  -5 -15   21.42    8.13
   6  -5  15   27.90   11.76
  -6  -5 -15   19.20   14.81
  -6   5 -16    2.95   17.75
  -6  -5 -16    3.82   11.79
   6  -5  16  -16.33   11.10
  -6  -5 -16  -16.93   14.26
  -6   5 -17   51.07   21.98
  -6  -5 -17   41.04    8.94
   6  -5  17   58.60   12.84
  -6  -5 -17   47.09   25.71
  -6   5 -18   10.35   18.89
  -6  -5 -18    3.02   11.14
   6  -5  18    1.55   11.49
  -6  -5 -18    9.78   14.80
  -6   5 -19   33.52   31.11
  -6  -5 -19   15.75    7.35
   6  -5  19   20.11   10.87
  -6  -5 -19   16.03   16.33
   6   6 -16   25.59   18.73
   6  -6 -16   17.26   32.33
  -6  -6  16    7.43   14.52
  -6  -6  16   -8.77   15.21
   6   6 -15    3.12   29.99
  -6   6  15    0.53   14.23
   6  -6 -15   18.61   22.13
  -6  -6  15   19.45   11.23
  -6  -6  15    9.15   14.68
   6   6 -14   11.26   20.08
  -6   6  14   44.15   23.12
   6  -6 -14   42.83   23.11
  -6  -6  14   27.60   11.72
  -6  -6  14   40.42   15.32
   6   6 -13    6.00   17.86
  -6   6  13    6.86   14.50
   6  -6 -13    1.89   19.81
  -6  -6  13  -11.82   17.27
  -6  -6  13   13.05   13.36
   6   6 -12   -1.33   16.62
  -6   6  12   -0.49   13.63
   6  -6 -12    6.70   29.43
  -6  -6  12    4.21   10.53
  -6  -6  12    7.89   19.28
   6   6 -11    6.09   26.53
  -6   6  11   15.73   15.37
   6  -6 -11   21.25   20.02
  -6  -6  11   14.28   16.82
  -6  -6  11   30.20   20.36
   6   6 -10   49.53   18.79
  -6   6  10   38.23   16.65
   6  -6 -10   41.12   21.44
  -6  -6  10   53.66   13.58
  -6  -6  10   66.58   22.40
   6   6  -9   48.04   28.83
  -6   6   9   58.55   18.15
   6  -6  -9   65.74   33.52
  -6  -6   9   46.20   20.60
  -6  -6   9   85.31   23.72
  -6   6   8  -11.14   15.31
   6   6  -8  -16.58   15.41
  -6  -6   8    1.39   19.65
  -6  -6   8   -7.38   11.76
   6  -6  -8    4.13   17.75
  -6   6   7   22.09   23.89
   6   6  -7   10.22   15.44
  -6  -6   7   -5.92   20.10
  -6  -6   7    3.88   17.80
   6  -6  -7   19.38   17.40
  -6   6   6    7.47   15.20
   6   6  -6   24.61   15.10
  -6  -6   6   30.85   19.51
  -6  -6   6    1.29   13.17
   6  -6  -6  -30.21   27.88
  -6   6   5  119.26   31.33
   6   6  -5  119.82   19.50
  -6  -6   5  109.58   25.19
  -6  -6   5   82.41   24.01
   6  -6  -5   60.28   24.04
   6   6  -4   23.20   18.78
  -6   6   4   80.21   18.82
  -6  -6   4   73.99   21.43
  -6   6   3  311.43   42.30
   6   6  -3  219.82   37.18
  -6  -6   3  265.00   31.20
  -6  -6   3  241.25   34.52
   6  -6  -3  258.44   29.97
  -6   6   2  233.15   27.01
  -6  -6   2  144.47   22.15
   6  -6  -2  221.44   27.74
  -6   6   1  342.41   44.48
   6   6  -1  237.37   37.38
  -6  -6   1  258.81   20.73
  -6  -6   1  202.50   35.80
   6  -6  -1  286.57   30.46
   6   6   0   84.78   18.06
  -6   6   0  194.52   23.80
  -6  -6   0  117.68   18.75
  -6  -6   0   95.61   15.77
  -6   6  -1  134.34   30.21
   6   6   1   86.31   24.28
  -6  -6  -1   39.80   13.54
  -6  -6  -1   94.69   25.37
   6  -6   1   50.67   19.05
  -6   6  -2   20.29   16.76
   6   6   2   -1.86   13.62
  -6  -6  -2    7.92   11.52
  -6  -6  -2    7.66   14.24
   6  -6   2   36.97   15.90
  -6   6  -3   -8.72   15.93
   6   6   3   15.61   12.36
  -6  -6  -3    4.50   11.80
  -6  -6  -3   -1.24   21.46
   6  -6   3   27.34   15.78
  -6   6  -4   42.12   18.01
   6   6   4   32.32   20.99
  -6  -6  -4   25.11   19.38
  -6  -6  -4   30.76   15.70
   6  -6   4   30.51   16.65
  -6   6  -5    3.75   16.61
   6   6   5    5.98   12.67
  -6  -6  -5    8.48   16.60
  -6  -6  -5   34.93   22.66
   6  -6   5   16.86   15.30
  -6   6  -6   18.61   24.01
   6   6   6   17.47   17.58
  -6  -6  -6   -9.84   10.77
  -6  -6  -6   12.49   14.05
   6  -6   6  -10.94   13.91
  -6   6  -7    3.51   18.15
   6   6   7   30.54   13.01
  -6  -6  -7   35.10   12.35
  -6  -6  -7   14.22   23.63
   6  -6   7   16.08   15.75
  -6   6  -8   21.94   17.04
   6   6   8   13.54   11.45
  -6  -6  -8    5.80   11.06
  -6  -6  -8   -2.47   14.30
   6  -6   8  -12.74   14.49
  -6   6  -9    6.32   30.48
   6   6   9   34.48   20.51
  -6  -6  -9   59.47   16.99
  -6  -6  -9   26.60   16.19
   6  -6   9   13.61   15.78
  -6   6 -10   26.76   19.56
   6   6  10   18.50   12.05
  -6  -6 -10   24.87   11.21
  -6  -6 -10   16.89   25.20
   6  -6  10    4.72   15.11
  -6   6 -11   51.41   22.71
   6   6  11   53.79   20.64
  -6  -6 -11   50.96   12.99
  -6  -6 -11   40.19   18.87
   6  -6  11   73.34   24.44
  -6   6 -12   -1.11   28.95
   6   6  12   -0.18   10.68
  -6  -6 -12   -4.09   16.49
  -6  -6 -12  -15.42   15.61
   6  -6  12   -9.12   13.81
  -6   6 -13    7.75   22.34
  -6  -6 -13   48.21   11.26
   6  -6  13   30.16   23.54
  -6  -6 -13   -3.67   27.68
  -6   6 -14  121.99   30.85
   6  -6  14  175.14   22.21
  -6  -6 -14  143.84   25.83
  -6  -6 -14  197.20   16.83
  -6   6 -15   26.05   23.18
   6  -6  15   44.65   24.28
  -6  -6 -15   27.11   18.40
  -6  -6 -15   35.60   17.61
   6   7  -9   66.66   23.73
   6  -7  -9   85.39   40.83
  -6  -7   9   88.42   27.81
  -6  -7   9   49.41   25.87
  -6   7   8   14.69   18.71
   6   7  -8    8.48   18.86
  -6  -7   8    1.39   22.90
  -6  -7   8    6.75   14.84
   6  -7  -8   -1.86   21.90
  -6   7   7   44.60   27.83
   6   7  -7    9.88   28.36
  -6  -7   7    0.04   23.02
  -6  -7   7   18.69   14.66
   6  -7  -7    1.87   21.02
  -6   7   6   26.51   19.17
   6   7  -6   13.98   17.99
  -6  -7   6  -21.58   22.05
  -6  -7   6   15.55   23.20
   6  -7  -6   19.33   31.09
  -6   7   5   13.35   18.49
   6   7  -5  -42.03   26.54
  -6  -7   5    0.92   20.45
  -6  -7   5    4.36   13.92
   6  -7  -5    8.82   19.83
  -6   7   4  -17.12   18.12
   6   7  -4    6.10   16.96
  -6  -7   4   20.26   13.00
  -6  -7   4  -17.34   23.45
   6  -7  -4   -3.01   29.12
  -6   7   3   55.62   19.10
   6   7  -3    2.98   17.16
  -6  -7   3    2.93   14.51
  -6  -7   3   -5.06   16.09
   6  -7  -3   19.83   21.65
  -6   7   2   97.84   34.36
   6   7  -2   45.00   19.66
  -6  -7   2   57.06   16.41
  -6  -7   2   52.33   28.21
   6  -7  -2   64.66   23.23
  -6   7   1   49.76   19.53
   6   7  -1    1.81   17.40
  -6  -7   1  -11.67   14.12
  -6  -7   1   23.46   16.94
   6  -7  -1   72.42   29.89
  -6   7   0   -6.50   31.43
   6   7   0   31.36   17.43
  -6  -7   0   28.99   14.45
  -6  -7   0  -16.31   26.85
   6  -7   0   40.84   20.52
  -6   7  -1   19.39   20.88
   6   7   1   35.48   17.74
  -6  -7  -1   12.22   14.97
  -6  -7  -1   39.01   18.15
   6  -7   1   58.31   31.20
  -6   7  -2   23.21   20.70
   6   7   2   25.96   17.02
  -6  -7  -2   31.81   14.63
  -6  -7  -2   10.77   18.29
   6  -7   2   41.18   20.25
  -6   7  -3   59.02   35.29
   6   7   3   68.86   18.60
  -6  -7  -3   83.03   26.09
  -6  -7  -3   29.46   32.24
   6  -7   3   55.05   22.07
  -6   7  -4   25.23   22.27
   6   7   4   34.60   16.47
  -6  -7  -4   12.02   21.59
  -6  -7  -4   43.72   19.00
   6  -7   4    0.72   30.33
  -6   7  -5   -4.23   20.98
   6   7   5   36.45   16.66
  -6  -7  -5   40.18   14.05
  -6  -7  -5    2.36   29.02
   6  -7   5   30.86   19.51
  -6   7  -6  -32.46   30.82
   6   7   6   13.29   14.30
  -6  -7  -6   -1.32   12.37
  -6  -7  -6   -6.71   17.44
   6  -7   6   -5.66   26.23
  -6   7  -7   43.71   20.95
   6   7   7    1.20   15.83
  -6  -7  -7   13.15   13.39
  -6  -7  -7   11.86   18.79
   6  -7   7   24.75   18.54
  -6  -7  -8   17.34   28.91
   7   0 -28  -14.08   12.46
   7   0 -27    9.17   11.84
   7   0 -27   16.73   13.79
   7   0 -26    1.45   10.47
   7   0 -26    4.77   12.53
   7   0 -25   85.66   18.80
   7   0 -25   36.79   14.19
   7   0 -24   -4.66    8.08
   7   0 -24    4.12   10.73
   7   0 -23   82.22   10.37
   7   0 -22    0.10    7.18
   7   0 -21  227.21   13.69
   7   0 -20   -0.83    9.30
   7   0 -19   18.78    6.05
   7   0 -18   -1.90    5.41
   7   0 -17    5.56    5.37
   7   0 -16    5.76    5.26
   7   0 -16   -0.45    7.75
   7   0 -15   47.75    6.08
   7   0 -15   45.44    7.91
   7   0 -14    5.24    3.20
   7   0 -14    0.52    4.13
   7   0 -13   58.42    5.99
   7   0 -13   46.60    4.73
   7   0 -12    1.63    4.62
   7   0 -12    1.36    3.38
   7   0 -11   11.52    5.10
   7   0 -11    8.50    5.00
   7   0 -10    3.40    3.12
   7   0 -10   -1.67    4.28
   7   0  -9 3615.17  121.60
   7   0  -9 3393.70  107.27
   7   0  -8   -1.71    3.00
   7   0  -8   -0.19    2.32
   7   0  -8   -0.75    3.92
   7   0  -7 5382.80  215.00
   7   0  -7 5341.44  195.65
   7   0  -7 5486.12  223.29
   7   0  -6    0.99    3.06
   7   0  -6   -4.77    2.79
   7   0  -6    0.09    3.23
   7   0  -5 1230.23   33.23
   7   0  -5 1154.68   24.16
   7   0  -5 1164.77   28.48
   7   0  -4   -0.90    2.94
   7   0  -4    0.56    1.30
   7   0  -4   -0.96    2.80
   7   0  -3 1479.72   37.27
   7   0  -3 1468.95   29.54
   7   0  -3 1610.16   40.84
   7   0  -2   -1.06    3.21
   7   0  -2    2.11    1.32
   7   0  -2    2.52    3.04
   7   0  -1  688.00   20.11
   7   0  -1  690.53   13.93
   7   0   0   -3.34    5.25
   7   0   0    5.98    1.45
   7   0   1  292.49    8.51
   7   0   1  286.64    3.77
   7   0   2   -6.21    3.37
  -7   0  -2    0.30    1.06
   7   0   3  192.51    6.73
   7   0   3  204.72    2.95
  -7   0  -3  191.76    4.86
   7   0   4   -3.38    3.31
   7   0   4    1.05    1.18
  -7   0  -4   -2.92    2.75
   7   0   5 1212.64   29.86
   7   0   5 1125.02   21.13
  -7   0  -5 1212.78   29.04
   7   0   6    1.26    3.40
   7   0   6   -1.35    1.87
  -7   0  -6   -0.10    2.41
   7   0   7  711.51   17.93
   7   0   7  723.40   13.07
  -7   0  -7  742.80   17.44
   7   0   8    4.00    5.21
  -7   0  -8    4.69    3.14
   7   0   9  370.04   13.42
  -7   0  -9  346.26   12.59
   7   0  10   -1.48    5.70
  -7   0 -10    8.54    3.78
   7   0  11    3.15    3.67
  -7   0 -11    3.25    6.54
   7   0  12    0.63    3.50
  -7   0 -12   -1.20    6.25
   7   0  13  138.26    6.12
  -7   0 -13  136.55    7.80
   7   0  14   -4.39    6.11
  -7   0 -14   -6.38    5.05
   7   0  15    3.61    3.69
  -7   0 -15   -6.44    5.46
   7   0  16    1.10    3.69
  -7   0 -16   -1.80    5.83
   7   0  17  572.91   19.44
  -7   0 -17  573.38   22.21
   7   0  18    4.10    4.18
  -7   0 -18    8.44    6.99
   7   0  19 1645.35   50.96
  -7   0 -19 1651.85   64.06
   7   0  20   -0.04    7.16
  -7   0 -20    3.33    8.09
   7   0  21  234.10    9.83
  -7   0 -21  221.00   15.53
   7   0  22   -1.33    7.37
  -7   0 -22   -3.13    9.07
   7   0  23  675.51   23.31
  -7   0 -23  731.34   42.67
   7   0  24   -5.63    8.30
  -7   0 -24   -2.34   15.51
  -7   0 -25  490.26   40.26
  -7   0 -26    4.11   12.05
   7   1 -27   21.24   23.27
   7  -1 -27   37.03   15.58
   7  -1 -27    3.85   27.85
   7   1 -26  110.29   24.00
   7  -1 -26  103.46   12.51
   7  -1 -26  107.48   31.53
   7   1 -25   56.36   13.92
   7  -1 -25   75.52   11.05
   7  -1 -25   76.19   25.58
   7   1 -24   21.05   11.16
   7  -1 -24   12.40   13.01
   7  -1 -24   19.97   20.40
   7   1 -23   30.27   11.15
   7  -1 -23   22.40    8.06
   7  -1 -23   59.55   20.79
   7   1 -22  167.78   14.58
   7  -1 -22  156.48   11.20
   7  -1 -22  175.86   17.95
   7   1 -21    9.31    8.50
   7  -1 -21   -3.11    6.18
   7  -1 -21  -17.66   10.72
   7   1 -20   25.34   13.51
   7  -1 -20   18.74    9.39
   7  -1 -20   27.65   11.16
   7   1 -19    9.33   12.39
   7  -1 -19   10.07    5.43
   7  -1 -19   15.15   10.18
   7   1 -18    1.17   10.49
   7  -1 -18   11.57    5.11
   7  -1 -18    7.20    2.24
   7  -1 -18   10.37    9.45
   7   1 -17  166.97   15.63
   7  -1 -17  180.84   12.75
   7  -1 -17  179.87    6.77
   7  -1 -17  161.33   21.72
   7   1 -16    3.60    9.41
   7  -1 -16    3.85    4.63
   7  -1 -16    6.51    3.86
   7  -1 -16    8.99   13.58
   7   1 -15  849.56   33.88
   7  -1 -15  844.82   25.31
   7  -1 -15  947.48   23.59
   7  -1 -15  952.10   50.23
   7   1 -14  162.31   12.61
   7  -1 -14  170.20   10.94
   7  -1 -14  185.24    6.81
   7  -1 -14  188.13   13.16
  -7  -1  14  161.41    5.41
   7   1 -13   16.61    5.00
   7   1 -13    5.83    7.76
   7  -1 -13   14.42    4.42
   7  -1 -13   23.99    4.15
   7  -1 -13   23.33    8.37
  -7  -1  13   22.30    4.42
   7   1 -12  292.91   11.14
   7   1 -12  286.20   13.88
   7  -1 -12  269.17    9.28
   7  -1 -12  300.21    7.11
   7  -1 -12  291.21   15.06
  -7  -1  12  278.84    9.87
   7   1 -11    5.55    6.76
   7   1 -11    9.10    6.15
   7  -1 -11    0.09    2.41
   7  -1 -11  -12.62   10.27
  -7  -1  11    4.40    2.79
   7   1 -10   23.66    5.06
   7   1 -10   32.18    7.06
   7  -1 -10   24.45    4.60
   7  -1 -10   28.05    7.37
  -7  -1  10   27.84    3.25
   7   1  -9  976.89   32.76
   7   1  -9 1035.30   26.50
   7  -1  -9  957.52   21.73
   7  -1  -9  953.55   32.99
  -7  -1   9  933.89   22.33
   7   1  -8   28.77    5.15
   7   1  -8   34.28    3.82
   7  -1  -8   28.86    6.74
  -7  -1   8   32.57    5.18
   7   1  -7    6.92    6.45
   7   1  -7    6.17    4.47
   7  -1  -7    0.01    8.38
  -7  -1   7    3.74    4.56
   7   1  -6 1457.87   43.37
   7   1  -6 1440.75   36.31
   7  -1  -6 1492.39   46.88
  -7  -1   6 1476.71   40.86
   7   1  -5   53.55    8.40
   7   1  -5   51.48    5.07
   7  -1  -5   44.88    5.92
  -7  -1   5   49.20    5.84
   7   1  -4   22.11    4.50
   7   1  -4   21.71    2.61
  -7   1   4   15.06    3.61
  -7  -1   4   16.98    5.36
   7  -1  -4   24.78    7.40
   7   1  -3  314.55   10.36
  -7   1   3  272.94   11.45
  -7  -1   3  325.64   11.29
   7  -1  -3  299.58   14.59
   7   1  -2  530.84   15.58
   7   1  -2  554.72   11.48
  -7   1   2  515.55   17.61
  -7  -1   2  520.38   12.96
   7  -1  -2  489.60   18.75
   7   1  -1   20.23    6.91
   7   1  -1   25.16    1.80
  -7   1   1   22.83    3.80
   7  -1  -1   24.94    4.20
  -7  -1   1   12.95    4.00
   7   1   0 1676.48   48.94
  -7   1   0 1692.04   55.75
  -7  -1   0 1833.52   48.35
   7  -1   0 1752.02   50.49
   7   1   1  123.41    7.11
  -7   1  -1  126.05    8.73
  -7  -1  -1  128.37    6.08
   7  -1   1  141.42    8.52
   7   1   2 6544.23  293.17
  -7   1  -2 6095.47  308.23
  -7  -1  -2 6860.02  298.55
   7  -1   2 6641.81  294.71
   7   1   3 1514.85   43.33
  -7   1  -3 1457.03   44.65
  -7  -1  -3 1488.69   43.39
   7  -1   3 1483.70   40.16
   7   1   4 3629.69  132.45
  -7   1  -4 3620.50  146.82
  -7  -1  -4 3837.27  105.12
  -7  -1  -4 3580.84  122.09
  -7  -1  -4 3837.47  116.18
   7   1   5  294.78   10.50
  -7   1  -5  290.81   10.97
   7  -1   5  285.81    8.35
  -7  -1  -5  296.05    5.38
  -7  -1  -5  295.38    9.07
  -7  -1  -5  319.82    8.13
   7   1   6 1625.72   48.04
  -7   1  -6 1544.46   54.08
  -7  -1  -6 1697.32   37.60
   7  -1   6 1616.80   43.59
  -7  -1  -6 1678.58   43.01
   7   1   7   37.37    5.11
  -7   1  -7   34.16    8.48
  -7  -1  -7   35.12    3.10
   7  -1   7   36.76    3.52
  -7  -1  -7   39.59    3.42
   7   1   8   97.72    6.34
  -7   1  -8  105.06   10.06
  -7  -1  -8  102.33    4.66
   7  -1   8  100.13    4.35
  -7  -1  -8  100.83    4.83
   7   1   9  238.58    9.20
  -7   1  -9  220.50   10.70
  -7  -1  -9  250.05    7.73
   7  -1   9  232.38    8.73
  -7  -1  -9  228.79   10.27
   7   1  10  332.30   11.64
  -7   1 -10  330.38   17.93
  -7  -1 -10  353.09   10.62
   7  -1  10  365.38   12.11
  -7  -1 -10  369.07   11.04
   7   1  11  212.30    8.77
  -7   1 -11  212.95   11.53
  -7  -1 -11  218.05    8.49
   7  -1  11  228.42    6.96
  -7  -1 -11  232.27   12.60
   7   1  12  126.78    9.97
  -7   1 -12  133.82   13.49
  -7  -1 -12  133.56    5.57
   7  -1  12  161.74    8.31
  -7  -1 -12  138.87   10.65
   7   1  13  155.77   11.64
  -7   1 -13  159.50   10.89
  -7  -1 -13  156.16    6.53
   7  -1  13  177.40    6.52
  -7  -1 -13  170.22   11.87
   7   1  14  193.39    9.14
  -7   1 -14  210.04   12.68
  -7  -1 -14  203.85    7.82
   7  -1  14  212.17   10.58
  -7  -1 -14  206.41    9.90
   7   1  15  202.61    9.61
  -7   1 -15  235.08   19.60
   7  -1  15  254.71    8.84
  -7  -1 -15  201.71    8.37
   7  -1  15  232.68    8.35
  -7  -1 -15  227.88   10.90
   7   1  16   27.21    8.06
  -7   1 -16   49.89   13.24
   7  -1  16   35.95    4.81
  -7  -1 -16   21.18    7.46
   7  -1  16   35.04    4.85
  -7  -1 -16   36.34    6.81
   7   1  17  125.09   11.68
  -7   1 -17  107.48   17.36
   7  -1  17  154.12    9.51
  -7  -1 -17  124.43   12.24
   7  -1  17  130.15   10.17
  -7  -1 -17  125.42    9.66
   7   1  18   71.17    7.18
  -7   1 -18   77.59   11.17
   7  -1  18   83.75    5.72
  -7  -1 -18   89.95    7.73
   7  -1  18   77.10    6.54
  -7  -1 -18   71.89    8.57
   7   1  19    9.88    7.87
  -7   1 -19    3.71    8.75
   7  -1  19   -1.23    4.11
  -7  -1 -19    5.65    5.95
   7  -1  19   -0.96    5.06
  -7  -1 -19    2.08    6.98
   7   1  20   97.74    8.13
  -7   1 -20   90.07   12.71
  -7  -1 -20   88.32    9.35
   7  -1  20   95.34    8.82
  -7  -1 -20   76.97   15.38
   7   1  21  102.75   12.17
  -7   1 -21  123.95   14.41
  -7  -1 -21  118.17    9.91
   7  -1  21  118.25    6.53
  -7  -1 -21  112.61   16.99
   7   1  22   34.56   10.50
  -7   1 -22   48.84   12.17
  -7  -1 -22   32.74   12.85
   7  -1  22   46.98    7.80
  -7  -1 -22   27.48   14.66
   7   1  23   21.99    9.82
  -7   1 -23   19.74   12.61
  -7  -1 -23   31.64   14.00
   7  -1  23   23.68    4.72
  -7  -1 -23   21.61   16.04
  -7   1 -24  181.30   19.50
  -7  -1 -24  188.68   15.12
   7  -1  24  165.31   12.40
  -7  -1 -24  220.60   17.17
  -7   1 -25    0.73   12.47
  -7  -1 -25    4.25    9.35
  -7  -1 -25   -7.70   10.58
  -7   1 -26   -3.33   20.58
  -7  -1 -26   12.93   10.41
  -7  -1 -26   12.23   12.05
   7   2 -26   29.04   15.23
   7  -2 -26   14.77    9.04
   7  -2 -26   22.74   18.34
   7   2 -25   -4.28   13.61
   7  -2 -25    7.79   11.55
   7  -2 -25    2.17   15.59
   7   2 -24   22.90   13.81
   7  -2 -24   21.79    7.95
   7  -2 -24   34.52   16.87
   7   2 -23   -2.36   11.96
   7  -2 -23    5.34    6.76
   7  -2 -23   -3.58   14.67
   7   2 -22   16.90   11.41
   7  -2 -22    1.81   10.01
   7  -2 -22   12.79   13.95
   7   2 -21   33.03   12.03
   7  -2 -21   28.39    6.71
   7  -2 -21   31.08   15.20
   7   2 -20    9.67   10.28
   7  -2 -20   11.17    6.07
   7  -2 -20   -2.69   12.75
  -7  -2  20    5.44    2.74
   7   2 -19  273.14   19.49
   7  -2 -19  278.52   17.18
   7  -2 -19  312.12   23.48
  -7  -2  19  258.96   10.77
   7   2 -18  469.78   23.42
   7  -2 -18  412.95   16.48
   7  -2 -18  476.27   39.93
  -7  -2  18  482.41   16.20
   7   2 -17  356.60   19.16
   7  -2 -17  372.61   36.11
  -7  -2  17  310.88   13.85
  -7  -2  17  372.60   13.11
   7   2 -16  453.12   21.09
   7  -2 -16  407.81   11.40
   7  -2 -16  428.09   26.32
  -7  -2  16  402.06   12.77
  -7  -2  16  483.95   18.60
   7   2 -15   11.17    7.80
   7  -2 -15   12.53    2.73
   7  -2 -15   -0.21   11.23
  -7  -2  15   17.22    4.11
  -7  -2  15    9.38    4.67
   7   2 -14 1139.85   42.32
   7  -2 -14 1182.33   53.76
  -7  -2  14 1099.20   37.32
  -7  -2  14 1295.53   34.98
   7   2 -13    0.35    9.84
   7  -2 -13   17.28   14.46
  -7  -2  13   -0.35    6.37
  -7  -2  13    6.75    5.92
   7   2 -12   22.50    7.09
   7  -2 -12   31.50   10.46
  -7  -2  12   19.89    4.68
  -7  -2  12   31.45    6.23
   7   2 -11  180.45   10.78
   7  -2 -11  167.25   14.83
  -7  -2  11  177.88    7.79
  -7  -2  11  197.97    6.93
   7   2 -10  293.10   16.96
   7  -2 -10  301.43   25.61
  -7  -2  10  280.52   10.11
  -7  -2  10  318.85   10.79
   7   2  -9   63.57    7.02
   7  -2  -9   72.85   10.45
  -7  -2   9   56.39    5.63
  -7  -2   9   67.90    3.96
   7   2  -8   77.81    8.08
   7   2  -8   82.54    9.89
  -7   2   8   70.23    7.63
   7  -2  -8   89.68   15.73
  -7  -2   8   85.49    3.99
  -7  -2   8   78.37    5.88
   7   2  -7   75.96   11.86
   7   2  -7   63.52    6.23
  -7   2   7   63.89   11.54
   7  -2  -7   64.46    9.12
  -7  -2   7   77.88    5.40
  -7  -2   7   67.97    5.44
   7   2  -6  145.26    9.66
   7   2  -6  160.69    8.13
  -7   2   6  116.59   12.69
   7  -2  -6  152.86   10.96
  -7  -2   6  159.91    4.84
  -7  -2   6  144.03    7.05
   7   2  -5   12.72    6.37
   7   2  -5   10.10    4.46
  -7   2   5    9.27    5.74
   7  -2  -5   13.75    7.00
  -7  -2   5   13.79    2.51
  -7  -2   5   13.70    4.26
   7   2  -4   16.31    9.57
   7   2  -4   10.01    4.13
  -7   2   4    2.69    5.91
   7  -2  -4    3.24   10.10
  -7  -2   4   10.52    3.92
  -7  -2   4   11.89    4.24
   7   2  -3   15.14    5.83
   7   2  -3   10.17    5.96
  -7   2   3    8.95    5.83
   7  -2  -3   -2.39   10.03
  -7  -2   3   10.73    3.45
  -7  -2   3    0.04    4.46
   7   2  -2 1635.59   55.26
   7   2  -2 1746.26   52.16
  -7   2   2 1500.34   54.86
   7  -2  -2 1526.94   57.60
  -7  -2   2 1638.45   42.60
  -7  -2   2 1660.23   48.45
   7   2  -1   41.57    6.98
  -7   2   1   36.02    6.92
   7   2  -1   39.73    5.71
  -7  -2   1   29.75    5.44
  -7  -2   1   42.56    4.52
   7  -2  -1   37.22    7.19
   7   2   0    8.53    9.01
   7   2   0    1.70    2.91
   7  -2   0   10.15    5.70
  -7  -2   0    1.88    4.65
  -7  -2   0    2.09    3.49
   7   2   1 2471.53   97.80
  -7   2  -1 2481.43  101.50
   7   2   1 2601.58   80.08
  -7  -2  -1 2728.64   93.57
  -7  -2  -1 2535.50   75.24
   7  -2   1 2398.52  103.09
   7   2   2 1202.80   46.67
  -7   2  -2 1299.36   52.91
   7   2   2 1222.19   31.75
  -7  -2  -2 1179.95   33.18
  -7  -2  -2 1284.24   32.53
   7  -2   2 1122.00   47.12
   7   2   3   77.03    7.67
   7   2   3   67.22    4.99
   7  -2   3   70.35    7.12
  -7  -2  -3   73.16    5.89
  -7  -2  -3   82.33    6.25
   7   2   4   11.43    6.39
  -7   2  -4   -0.14   10.15
   7  -2   4   12.73    5.40
  -7  -2  -4   17.22    5.37
  -7  -2  -4   18.08    4.59
   7   2   5   -4.97    5.75
  -7   2  -5   -1.08    9.49
  -7  -2  -5    8.80    6.75
   7  -2   5   -0.42    4.95
  -7  -2  -5    2.80    3.71
   7   2   6   -0.30    5.94
  -7   2  -6    7.50   10.11
  -7  -2  -6    8.21    4.06
   7  -2   6    7.73    4.92
  -7  -2  -6    3.17    6.32
   7   2   7  212.96   11.10
  -7   2  -7  205.05   17.25
  -7  -2  -7  219.70    8.43
   7  -2   7  197.90    9.98
  -7  -2  -7  216.80    9.20
   7   2   8   -2.37    5.55
  -7   2  -8    5.06    6.29
  -7  -2  -8   -6.64    6.28
   7  -2   8    5.56    4.74
  -7  -2  -8    1.08    4.48
   7   2   9  479.37   18.16
  -7   2  -9  463.70   27.17
   7  -2   9  475.89   20.24
  -7  -2  -9  468.05   10.86
  -7  -2  -9  501.17   14.60
  -7  -2  -9  481.47   17.24
   7   2  10   46.20    9.73
  -7   2 -10   21.78    8.65
   7  -2  10   35.11    8.99
  -7  -2 -10   39.09    4.45
  -7  -2 -10   37.89    4.81
  -7  -2 -10   43.00    9.55
   7   2  11  194.53   14.99
  -7   2 -11  186.92   13.62
   7  -2  11  216.36    9.93
  -7  -2 -11  199.29    6.01
  -7  -2 -11  190.17   10.81
  -7  -2 -11  208.71   11.07
   7   2  12   26.26    9.92
  -7   2 -12   18.48    8.75
   7  -2  12   16.15    4.99
  -7  -2 -12   15.33    4.52
  -7  -2 -12   15.54    4.40
  -7  -2 -12    6.88   10.17
   7   2  13    1.03    5.97
  -7   2 -13    0.11   12.81
  -7  -2 -13    3.52    3.02
   7  -2  13    6.29    4.82
  -7  -2 -13    8.11    6.75
   7   2  14   21.07    6.42
  -7   2 -14   26.47    9.39
  -7  -2 -14   16.95    3.54
   7  -2  14   19.07    5.27
  -7  -2 -14   21.43   11.75
   7   2  15  127.84   10.01
  -7   2 -15  109.92   14.45
  -7  -2 -15  163.97    9.20
   7  -2  15  167.85   11.96
  -7  -2 -15  143.18   16.08
   7   2  16   24.22   10.22
  -7   2 -16   12.99   16.54
  -7  -2 -16   22.53    4.31
   7  -2  16   25.87    5.48
  -7  -2 -16   34.55    8.28
   7   2  17    2.27   10.02
  -7   2 -17    8.42   15.18
  -7  -2 -17    6.04    4.09
   7  -2  17    6.65    8.23
  -7  -2 -17   12.56    8.02
   7   2  18   11.56    7.00
  -7   2 -18   18.90   10.86
  -7  -2 -18   15.30    7.12
   7  -2  18   18.87    5.41
  -7  -2 -18   14.91    8.71
   7   2  19   -5.51    9.80
  -7   2 -19   -3.36   10.61
  -7  -2 -19   -1.53    4.99
   7  -2  19    2.85    5.22
  -7  -2 -19    3.94    8.69
   7   2  20    4.46   11.19
  -7   2 -20   12.96   11.98
  -7  -2 -20    1.81    5.56
   7  -2  20   17.27    8.85
  -7  -2 -20   10.73    9.64
   7   2  21   14.91    7.58
  -7   2 -21    6.78   13.07
  -7  -2 -21   16.02    9.27
   7  -2  21   22.35    6.27
  -7  -2 -21    2.84   10.53
  -7   2 -22   25.90   13.62
   7  -2  22   13.89    5.06
  -7  -2 -22   19.90   11.16
   7  -2  22   22.96   10.56
  -7  -2 -22   18.45   11.29
  -7   2 -23   78.50   17.46
   7  -2  23   60.89    9.35
  -7  -2 -23   74.20    9.47
   7  -2  23   85.16    8.96
  -7  -2 -23   95.80   14.57
  -7   2 -24   -1.95   14.28
   7  -2  24    2.38    4.61
  -7  -2 -24   11.70    7.37
   7  -2  24   -7.88    7.02
  -7  -2 -24   -0.64   11.80
  -7   2 -25    7.02   15.00
  -7  -2 -25    2.33   12.16
   7  -2  25    3.15    6.96
  -7  -2 -25   17.03   12.82
   7   3 -25   26.01   16.14
   7  -3 -25    0.27    7.98
   7  -3 -25   -0.14   19.21
   7   3 -24   -6.35   15.09
   7  -3 -24   -3.14    7.56
   7  -3 -24   19.46   17.43
   7   3 -23   14.51   15.93
   7  -3 -23   20.29   12.55
   7  -3 -23   15.75   19.23
  -7  -3  23   15.67    6.04
  -7  -3  23   37.30    7.86
   7   3 -22    5.23   13.75
   7  -3 -22    5.50    7.29
   7  -3 -22   15.54   16.64
  -7  -3  22    1.85    4.46
  -7  -3  22   12.90    6.61
   7   3 -21   14.30   12.98
   7  -3 -21    4.18    7.05
   7  -3 -21   31.26   15.94
  -7  -3  21   11.66    7.10
  -7  -3  21   19.75   10.01
   7   3 -20   38.45   13.75
   7  -3 -20   34.89   16.66
  -7  -3  20   29.00    5.97
  -7  -3  20   35.04    6.69
   7   3 -19   77.05   15.01
   7  -3 -19   85.08   17.51
  -7  -3  19   53.16    6.90
  -7  -3  19   78.96    7.25
   7   3 -18   95.11   15.14
   7  -3 -18   84.89   27.77
  -7  -3  18  103.16   12.81
  -7  -3  18  102.61   11.32
   7   3 -17   48.74   18.70
   7  -3 -17   56.62   25.88
  -7  -3  17   53.08    7.51
  -7  -3  17   61.78    6.54
   7   3 -16  494.55   36.11
   7  -3 -16  475.25   32.48
  -7  -3  16  493.88   19.71
  -7  -3  16  519.83   17.02
   7   3 -15   12.61   10.10
   7  -3 -15   -1.34   12.66
  -7  -3  15   15.57    9.26
  -7  -3  15    9.59    7.69
   7   3 -14   -8.09    8.94
   7  -3 -14    0.86   11.88
  -7  -3  14   -0.16    8.77
  -7  -3  14   -0.63    4.60
   7   3 -13  270.12   17.89
   7  -3 -13  297.04   32.65
  -7  -3  13  279.23   19.24
  -7  -3  13  277.05   10.56
   7   3 -12   38.54   16.38
   7  -3 -12   36.89   14.03
  -7  -3  12   57.93    7.96
  -7  -3  12   51.86    6.02
   7   3 -11  950.84   40.24
  -7   3  11  871.98   37.26
   7  -3 -11  900.51   45.23
  -7  -3  11  999.56   28.51
  -7  -3  11  983.12   34.63
   7   3 -10  134.03   17.17
  -7   3  10  102.64   17.18
   7  -3 -10  114.82   15.59
  -7  -3  10  136.83   10.81
  -7  -3  10  135.50    9.91
   7   3  -9   39.28    8.69
  -7   3   9   30.55    9.50
   7  -3  -9   37.82   11.44
  -7  -3   9   38.90    4.90
  -7  -3   9   35.73    7.22
   7   3  -8   69.41   13.64
  -7   3   8   44.60   16.54
   7  -3  -8   45.51   18.60
  -7  -3   8   71.60    5.86
  -7  -3   8   65.66    7.82
   7   3  -7    3.01    6.95
  -7   3   7    6.45    8.15
   7  -3  -7   13.16    9.10
  -7  -3   7   -7.58    6.30
  -7  -3   7    8.67    6.02
   7   3  -6    4.91    6.53
  -7   3   6   14.01    8.46
   7  -3  -6    9.78    9.28
  -7  -3   6    7.41    4.13
  -7  -3   6    1.54    6.01
   7   3  -5   48.96    7.78
  -7   3   5   39.04   10.48
   7  -3  -5   41.94   16.47
  -7  -3   5   54.17    8.15
  -7  -3   5   61.84    7.45
   7   3  -4   -0.03    5.99
  -7   3   4  -33.49   12.38
   7  -3  -4    8.81    8.46
  -7  -3   4    8.68    6.48
  -7  -3   4   -4.97    6.01
   7   3  -3   21.16    6.56
  -7   3   3   37.27    9.22
   7  -3  -3   41.78    9.30
  -7  -3   3   30.53    7.28
  -7  -3   3   42.45    6.95
  -7   3   2  111.88   11.46
   7   3  -2  113.20    8.32
  -7  -3   2  118.31    8.99
  -7  -3   2  108.60   10.14
   7  -3  -2  109.70   12.58
  -7   3   1  173.48   13.43
   7   3  -1  170.59   13.75
  -7  -3   1  184.84   10.73
  -7  -3   1  142.89   11.87
   7  -3  -1  175.81   13.72
   7   3   0   46.39    9.62
   7   3   0   60.07    6.68
   7   3   1  933.34   36.96
   7   3   1  864.27   29.80
  -7   3  -1 1143.72   52.81
  -7  -3  -1  950.94   36.93
  -7  -3  -1  893.04   36.43
   7   3   2  458.44   21.45
  -7   3  -2  428.26   23.46
   7   3   2  459.10   21.12
  -7  -3  -2  467.36   17.81
  -7  -3  -2  518.98   23.86
   7  -3   2  472.16   30.49
   7   3   3   10.16    8.15
  -7   3  -3   -3.70    8.50
   7  -3   3    6.86    7.86
  -7  -3  -3    6.86    5.46
  -7  -3  -3   18.17    6.10
   7   3   4    6.55    7.31
  -7   3  -4   -8.09    8.31
   7   3   4    0.50    4.73
  -7  -3  -4    0.37    5.61
  -7  -3  -4   -0.15    5.46
   7  -3   4    0.01    7.01
   7   3   5   30.51    8.17
  -7   3  -5   16.78   14.03
   7   3   5   11.43    5.00
  -7  -3  -5    1.32    8.49
  -7  -3  -5    4.11    6.44
   7  -3   5   11.80    7.47
   7   3   6  264.20   15.78
  -7   3  -6  225.76   16.80
   7   3   6  257.27   10.75
  -7  -3  -6  248.99   11.57
  -7  -3  -6  275.80   13.95
   7  -3   6  236.52   14.17
   7   3   7    5.40    7.75
   7   3   7    1.87    4.53
  -7   3  -7    9.18    8.75
   7  -3   7   18.24   10.62
  -7  -3  -7   -0.33    5.21
  -7  -3  -7   -0.95    6.70
   7   3   8  181.59   13.27
  -7   3  -8  177.63   22.12
  -7  -3  -8  192.60   13.95
   7  -3   8  162.65   12.23
  -7  -3  -8  174.92   11.81
   7   3   9   24.35    7.82
  -7   3  -9    0.99    9.59
  -7  -3  -9   13.53    5.51
   7  -3   9    6.70    7.33
  -7  -3  -9   16.95    7.27
   7   3  10   47.53    9.23
  -7   3 -10   47.70   17.23
  -7  -3 -10   53.97    6.33
   7  -3  10   44.97    8.16
  -7  -3 -10   52.03   13.30
   7   3  11    1.07    7.79
  -7   3 -11    3.97    9.76
  -7  -3 -11    1.22    7.15
   7  -3  11    3.32   11.20
  -7  -3 -11    9.85    7.37
   7   3  12    4.97    7.56
  -7   3 -12   -0.28   10.15
  -7  -3 -12    1.07    4.52
   7  -3  12   12.63    6.67
  -7  -3 -12   -0.40   11.67
  -7   3 -13   23.16   17.64
  -7  -3 -13   27.26    8.05
   7  -3  13   27.99   10.88
  -7  -3 -13   21.39    8.85
  -7   3 -14   73.66   14.01
   7  -3  14   73.90    8.86
  -7  -3 -14   58.48    5.12
  -7  -3 -14   61.18    6.00
  -7  -3 -14   58.94   16.05
  -7   3 -15   64.11   15.80
   7  -3  15   74.31    8.53
  -7  -3 -15   81.82    8.00
  -7  -3 -15   77.79    6.42
  -7  -3 -15   66.49   11.56
   7  -3  16   31.72    7.43
  -7  -3 -16   24.63    5.10
  -7  -3 -16   30.09    4.59
  -7  -3 -16   21.10   10.23
  -7   3 -17    3.32   12.64
  -7  -3 -17   11.45    4.49
   7  -3  17    0.50    6.64
  -7  -3 -17    9.78   15.68
  -7   3 -18    3.88   13.44
  -7  -3 -18    3.75    7.50
   7  -3  18   17.00    6.91
  -7  -3 -18    9.45   15.52
  -7   3 -19   -1.03   13.44
  -7  -3 -19   -2.19    4.84
   7  -3  19    0.14    6.43
  -7  -3 -19   -1.40   15.96
  -7   3 -20    6.37   15.46
  -7  -3 -20   32.17    8.61
   7  -3  20   15.73    7.27
  -7  -3 -20   18.92   12.55
  -7   3 -21   16.03   24.09
  -7  -3 -21   10.96    6.01
   7  -3  21    0.58   10.44
  -7  -3 -21    8.53   12.23
  -7   3 -22   22.32   24.12
  -7  -3 -22    5.53    6.19
   7  -3  22    8.25    7.15
  -7  -3 -22  -10.15   12.51
  -7   3 -23   27.22   27.69
  -7  -3 -23   38.28   11.30
   7  -3  23   19.58   12.92
  -7  -3 -23   32.44   14.69
  -7   3 -24   75.75   31.66
  -7  -3 -24   63.46    9.68
   7  -3  24   85.91   10.34
  -7  -3 -24   71.14   17.78
   7   4 -23   10.89   17.93
   7  -4 -23   21.50   31.32
  -7  -4  23    5.12    7.33
  -7  -4  23   13.38    7.90
   7   4 -22  102.76   21.48
   7  -4 -22   73.56   37.89
  -7  -4  22   55.81   16.51
  -7  -4  22   94.82    9.76
   7   4 -21    8.38   15.41
   7  -4 -21  -12.35   28.89
  -7  -4  21   10.84    8.13
  -7  -4  21  -14.45   10.49
   7   4 -20    9.82   14.83
   7  -4 -20   -6.28   16.68
  -7  -4  20   -1.99   12.49
  -7  -4  20    4.63    6.65
   7   4 -19   33.49   16.99
   7  -4 -19   41.74   20.06
  -7  -4  19   52.80   16.48
  -7  -4  19   61.52   11.57
   7   4 -18   64.33   17.26
   7  -4 -18   93.06   21.31
  -7  -4  18   71.68   12.06
  -7  -4  18   85.68    8.65
   7   4 -17   37.79   22.56
   7  -4 -17   54.64   17.62
  -7  -4  17   39.48    9.91
  -7  -4  17   31.80    7.30
   7   4 -16   92.21   24.10
   7  -4 -16   49.44   30.43
  -7  -4  16   65.08   11.13
  -7  -4  16   78.04   11.47
   7   4 -15   37.34   13.64
   7  -4 -15   20.38   16.11
  -7  -4  15   26.19   13.51
  -7  -4  15   28.31    6.78
   7   4 -14  157.16   17.65
   7  -4 -14  163.97   21.85
  -7  -4  14  183.68   20.43
  -7  -4  14  140.46    9.95
   7   4 -13  405.48   37.38
  -7   4  13  345.84   22.57
   7  -4 -13  364.99   42.37
  -7  -4  13  408.13   17.57
  -7  -4  13  432.95   21.39
   7   4 -12  138.91   16.80
  -7   4  12  103.06   13.85
   7  -4 -12  137.73   19.62
  -7  -4  12  135.58    9.37
  -7  -4  12  130.05   12.69
   7   4 -11    9.08   10.60
  -7   4  11  -14.31   10.08
   7  -4 -11   -5.24   12.66
  -7  -4  11   13.96    9.43
  -7  -4  11    3.31    8.05
   7   4 -10  125.03   14.46
  -7   4  10   94.35   19.89
   7  -4 -10   87.45   25.86
  -7  -4  10  119.02    9.31
  -7  -4  10  120.81   12.10
   7   4  -9   69.58   11.60
  -7   4   9   38.11   11.80
   7  -4  -9   45.99   14.42
  -7  -4   9   39.94    7.57
  -7  -4   9   47.71    9.62
   7   4  -8   47.88   11.18
  -7   4   8   30.19   17.60
   7  -4  -8   40.55   13.91
  -7  -4   8   45.77    7.16
  -7  -4   8   38.36    9.38
   7   4  -7   98.48   18.26
  -7   4   7   50.38   13.52
   7  -4  -7   87.43   15.58
  -7  -4   7   82.70    8.52
  -7  -4   7   93.98   10.50
   7   4  -6   62.23   10.83
  -7   4   6   40.64   13.28
   7  -4  -6   24.77   21.21
  -7  -4   6   51.97   11.01
  -7  -4   6   49.69    9.39
  -7   4   5   75.81   14.73
   7   4  -5  108.52   12.26
  -7  -4   5  104.25   11.21
  -7  -4   5  113.51    9.76
   7  -4  -5  116.16   15.56
  -7   4   4   11.40   10.34
   7   4  -4    0.99   12.89
  -7  -4   4    3.06    8.12
  -7  -4   4   -0.12    6.38
   7  -4  -4   -2.31   19.07
  -7   4   3   44.29   22.03
   7   4  -3   58.08   16.61
  -7  -4   3   81.14   10.27
  -7  -4   3   80.54   14.08
   7  -4  -3   79.06   14.28
  -7   4   2  171.41   17.86
   7   4  -2  127.12   20.03
  -7  -4   2  171.77   13.06
  -7  -4   2  156.71   12.25
   7  -4  -2  187.82   19.19
   7   4  -1  147.95   12.55
  -7   4   1  135.09   16.71
  -7  -4   1  147.19   11.50
  -7  -4   1  168.69   12.91
  -7   4   0  263.48   28.37
   7   4   0  175.81   13.60
  -7  -4   0  122.14   22.42
  -7  -4   0  191.03   13.60
   7  -4   0  172.31   17.30
   7   4   1  103.90   11.00
   7  -4   1  117.98   14.58
  -7  -4  -1   94.74   15.86
   7   4   2   13.82    7.92
  -7  -4  -2   12.31    8.11
  -7   4  -3  541.43   42.90
   7   4   3  589.62   25.32
  -7  -4  -3  609.17   25.41
  -7  -4  -3  537.47   28.06
   7  -4   3  614.31   31.55
  -7   4  -4   22.48   12.53
   7   4   4   27.95    8.13
  -7  -4  -4   16.93    8.56
  -7  -4  -4   26.43    9.29
   7  -4   4   42.56   10.57
   7   4   5    9.83    7.53
   7  -4   5   20.97   15.82
  -7  -4  -5   29.46   12.32
  -7  -4  -5    4.86    9.06
  -7   4  -6  101.48   15.26
   7   4   6   84.56   14.06
  -7  -4  -6   74.52   13.96
  -7  -4  -6   63.75   18.82
   7  -4   6   92.60   12.67
  -7   4  -7  121.09   25.52
   7   4   7  128.82   15.27
  -7  -4  -7  158.27   11.41
  -7  -4  -7  121.63   22.15
   7  -4   7  163.25   14.87
  -7   4  -8   53.24   15.50
   7   4   8   56.04   13.57
  -7  -4  -8   86.09    9.12
  -7  -4  -8   80.69   12.38
   7  -4   8   72.70   18.45
   7   4   9  460.93   19.49
  -7   4  -9  425.00   42.42
   7  -4   9  481.24   25.99
  -7  -4  -9  513.22   27.97
  -7  -4  -9  474.96   36.20
  -7   4 -10   48.46   14.86
  -7  -4 -10   42.39    7.88
   7  -4  10   36.15   10.83
  -7  -4 -10   54.42   11.54
  -7   4 -11   38.89   20.11
  -7  -4 -11   11.57    6.92
   7  -4  11   -6.39   15.33
  -7  -4 -11   19.52    9.90
  -7   4 -12  -11.18   12.84
  -7  -4 -12   10.69    9.35
   7  -4  12   11.99    8.98
  -7  -4 -12    5.78    9.92
  -7   4 -13   20.10   13.17
  -7  -4 -13    0.64    6.05
   7  -4  13    6.04   12.93
  -7  -4 -13    3.94   14.91
  -7   4 -14   26.84   22.37
  -7  -4 -14   17.11    9.83
   7  -4  14   16.52    9.30
  -7  -4 -14    2.33   10.75
  -7   4 -15    9.62   21.32
  -7  -4 -15   -6.59    5.61
   7  -4  15  -19.50   13.28
  -7  -4 -15    8.87   16.99
  -7   4 -16   60.41   18.49
  -7  -4 -16   86.20    7.74
   7  -4  16   88.24   11.99
  -7  -4 -16   67.58   14.58
  -7   4 -17   -0.09   15.35
  -7  -4 -17    4.05    8.85
   7  -4  17   10.59   12.28
  -7  -4 -17    5.12   11.64
  -7   4 -18   89.68   30.11
   7  -4  18   87.60   11.24
  -7  -4 -18   68.12    7.49
  -7  -4 -18   75.55    7.76
  -7  -4 -18   69.45   15.89
  -7   4 -19  116.30   33.95
   7  -4  19  109.92   17.19
  -7  -4 -19  111.06   12.41
  -7  -4 -19  105.43   11.60
  -7  -4 -19   95.05   26.87
  -7   4 -20   71.59   30.81
  -7  -4 -20   39.61    7.09
   7  -4  20   39.41   10.40
  -7  -4 -20   30.30   23.29
  -7   4 -21   41.18   20.43
  -7  -4 -21   41.97   11.12
   7  -4  21   56.65   16.24
  -7  -4 -21   39.15   16.15
  -7   4 -22   -7.23   19.14
  -7  -4 -22   15.48   15.06
   7   5 -20    9.52   18.38
   7  -5 -20   -2.33   31.25
  -7  -5  20    6.55   11.82
  -7  -5  20    2.56    8.08
   7   5 -19   -0.02   16.98
   7  -5 -19    3.68   30.58
  -7  -5  19    9.80   16.86
  -7  -5  19   -4.50    7.53
   7   5 -18    3.98   16.87
   7  -5 -18  -14.35   19.09
  -7  -5  18   21.36   17.80
  -7  -5  18   -2.12   12.36
   7   5 -17   -9.62   24.82
   7  -5 -17   24.38   19.24
  -7  -5  17   -2.97   11.59
  -7  -5  17    8.09    7.83
   7   5 -16   23.53   26.17
   7  -5 -16   17.14   20.08
  -7  -5  16   31.49   12.26
  -7  -5  16   24.25   12.44
   7   5 -15    1.42   14.70
   7  -5 -15   -1.66   26.36
  -7  -5  15   -0.71   10.38
  -7  -5  15    0.18    7.80
   7   5 -14  301.58   27.95
  -7   5  14  271.07   22.70
   7  -5 -14  353.76   47.27
  -7  -5  14  257.60   17.24
  -7  -5  14  351.22   22.32
   7   5 -13   -7.45   21.34
  -7   5  13   22.22   17.41
   7  -5 -13   -7.36   17.16
  -7  -5  13    6.53   13.13
  -7  -5  13   12.29   10.21
   7   5 -12   -1.20   14.03
  -7   5  12   12.44   12.10
   7  -5 -12    6.06   16.62
  -7  -5  12    3.92    8.11
  -7  -5  12    5.25   15.71
   7   5 -11   33.94   14.56
  -7   5  11   17.51   19.79
   7  -5 -11   20.66   27.15
  -7  -5  11   22.79   14.18
  -7  -5  11   27.20   16.30
   7   5 -10  122.16   28.30
  -7   5  10   93.10   17.47
   7  -5 -10  160.59   22.22
  -7  -5  10  108.71   12.74
  -7  -5  10  153.35   22.38
   7   5  -9  102.75   17.43
  -7   5   9   73.44   23.56
   7  -5  -9   88.89   21.74
  -7  -5   9   90.37   18.09
  -7  -5   9  121.69   20.87
   7   5  -8    7.60   18.30
  -7   5   8   -7.98   12.11
   7  -5  -8    4.21   14.62
  -7  -5   8    3.14    8.27
  -7  -5   8    0.03   15.26
   7   5  -7   29.94   13.09
  -7   5   7   33.15   20.19
   7  -5  -7   21.22   15.53
  -7  -5   7   36.22   15.54
  -7  -5   7   24.31   16.75
  -7   5   6   -9.49   12.80
   7   5  -6    3.44   18.70
  -7  -5   6    4.34   15.74
  -7  -5   6  -15.95    9.07
   7  -5  -6  -64.01   23.47
  -7   5   5  107.48   26.02
   7   5  -5  125.35   16.43
  -7  -5   5  118.08   21.36
  -7  -5   5   96.65   20.36
   7  -5  -5  136.26   19.66
  -7   5   4   36.48   14.43
   7   5  -4   36.96   11.87
  -7  -5   4   15.93   17.12
  -7  -5   4   22.41   10.62
   7  -5  -4   12.04   24.55
  -7   5   3   20.12   21.38
   7   5  -3  -16.41   17.18
  -7  -5   3   -1.81   14.01
  -7  -5   3    4.29   10.63
   7  -5  -3  -22.86   13.78
  -7   5   2  175.27   19.59
   7   5  -2  173.30   16.77
  -7  -5   2  171.02   22.43
  -7  -5   2  132.55   22.59
   7  -5  -2  183.50   31.11
   7   5  -1   46.89   11.93
  -7  -5   1   50.85   11.54
  -7  -5   1   56.76   11.91
   7   5   0   87.53   19.09
  -7   5   0   45.11   15.65
  -7  -5   0   67.13   13.31
  -7  -5   0   27.36   11.43
  -7   5  -1  132.58   28.86
   7   5   1  129.67   22.49
  -7  -5  -1  135.60   14.28
  -7  -5  -1  107.23   22.78
   7  -5   1  155.00   20.08
   7   5   2    8.38    9.92
   7  -5   2   11.77   13.03
  -7  -5  -2    0.21    9.73
  -7  -5  -2   18.24   10.35
  -7   5  -3    2.72   13.60
   7   5   3    2.42    9.65
  -7  -5  -3   -6.82    9.60
  -7  -5  -3   36.09   17.23
   7  -5   3   26.60   20.24
  -7   5  -4   50.75   15.37
   7   5   4   37.90   16.57
  -7  -5  -4   50.86   15.16
  -7  -5  -4   37.74   13.31
   7  -5   4   42.77   14.30
  -7   5  -5   31.18   23.22
   7   5   5   36.07   17.27
  -7  -5  -5    1.84    9.77
  -7  -5  -5   43.82   13.38
   7  -5   5    5.85   20.94
  -7   5  -6  137.40   20.71
   7   5   6  132.70   14.71
  -7  -5  -6  169.87   14.02
  -7  -5  -6  194.07   28.01
   7  -5   6  144.84   18.66
  -7   5  -7  225.35   37.46
   7   5   7  257.21   17.95
  -7  -5  -7  265.96   17.62
  -7  -5  -7  264.52   24.20
   7  -5   7  264.03   22.24
  -7   5  -8   -3.74   15.98
   7   5   8   12.71   15.01
  -7  -5  -8    0.52   14.51
  -7  -5  -8   22.09   19.80
   7  -5   8   33.49   13.49
  -7   5  -9   -8.34   15.27
   7   5   9    2.09    9.33
  -7  -5  -9   14.24    8.44
  -7  -5  -9    5.98   13.12
   7  -5   9   13.31   12.56
   7   5  10  265.45   17.91
  -7   5 -10  240.93   27.82
   7  -5  10  274.90   33.57
  -7  -5 -10  302.25   17.86
  -7  -5 -10  249.64   34.88
  -7   5 -11   94.36   20.52
   7  -5  11   63.94   15.52
  -7  -5 -11   99.60   17.22
  -7  -5 -11  104.69   11.83
  -7   5 -12  -26.54   24.80
   7  -5  12   17.66   18.77
  -7  -5 -12   15.99   19.90
  -7  -5 -12   17.31   12.13
  -7   5 -13   34.30   18.31
  -7  -5 -13   44.28    9.11
   7  -5  13   41.88   12.61
  -7  -5 -13   36.45   14.96
  -7   5 -14   -6.83   17.12
  -7  -5 -14   12.17   12.21
   7  -5  14   41.95   18.47
  -7  -5 -14   -0.35   14.01
  -7   5 -15   49.87   18.26
  -7  -5 -15   20.61    7.90
   7  -5  15    3.53   11.61
  -7  -5 -15   26.64   21.61
  -7   5 -16   28.28   29.24
  -7  -5 -16   23.37    7.77
   7  -5  16   43.31   18.65
  -7  -5 -16    0.91   14.53
  -7   5 -17   33.18   19.20
  -7  -5 -17    0.56   10.71
   7  -5  17   15.15   11.00
  -7  -5 -17   -6.28   14.72
  -7   5 -18  161.47   29.69
  -7  -5 -18  177.24   12.07
   7  -5  18  179.78   27.26
  -7  -5 -18  176.96   35.06
  -7   5 -19   30.24   22.32
   7   6 -15   24.40   31.29
  -7   6  15   15.48   14.21
   7  -6 -15   32.87   23.74
  -7  -6  15   18.31   15.52
  -7  -6  15   27.28   14.71
   7   6 -14   -6.99   17.92
  -7   6  14    9.57   13.38
   7  -6 -14   -5.27   20.18
  -7  -6  14   -0.28   10.62
  -7  -6  14    5.25   19.58
   7   6 -13  102.04   22.84
  -7   6  13   67.78   18.53
   7  -6 -13  104.03   39.37
  -7  -6  13   66.52   14.05
  -7  -6  13  120.44   26.80
   7   6 -12   37.78   26.15
  -7   6  12   -6.89   14.61
   7  -6 -12   21.99   29.61
  -7  -6  12  -11.89   16.85
  -7  -6  12   20.22   20.17
   7   6 -11   25.19   16.22
  -7   6  11   15.42   22.04
   7  -6 -11   -3.37   19.35
  -7  -6  11   -9.31   10.52
  -7  -6  11    6.68   19.70
   7   6 -10   10.86   15.66
  -7   6  10  -10.82   13.28
   7  -6 -10   -3.12   18.26
  -7  -6  10    4.91   15.64
  -7  -6  10   -4.42   12.18
  -7   6   9   55.27   28.28
   7   6  -9   74.24   29.82
  -7  -6   9   94.05   16.02
  -7  -6   9   58.41   14.82
   7  -6  -9   73.87   34.86
  -7   6   8   -5.05   15.09
   7   6  -8    8.78   14.99
  -7  -6   8    4.89   11.81
  -7  -6   8   -1.23   16.49
   7  -6  -8  -13.15   18.22
  -7   6   7   11.04   22.54
   7   6  -7   23.41   22.14
  -7  -6   7    0.22   12.20
  -7  -6   7   -2.99   11.68
   7  -6  -7    9.73   26.90
  -7   6   6    9.89   15.69
   7   6  -6   18.25   14.84
  -7  -6   6   15.85   12.24
  -7  -6   6   13.50   18.01
   7  -6  -6   -2.58   18.20
  -7   6   5  -18.49   23.87
   7   6  -5   18.46   22.40
  -7  -6   5   26.93   12.59
  -7  -6   5   14.46   12.85
   7  -6  -5    9.90   17.80
  -7   6   4   68.19   17.99
   7   6  -4   16.83   15.28
  -7  -6   4   15.19   13.92
  -7  -6   4   -2.37   20.22
   7  -6  -4   15.14   28.95
  -7   6   3   97.42   20.06
   7   6  -3    6.19   28.03
  -7  -6   3   94.72   24.94
  -7  -6   3   89.60   18.21
   7  -6  -3  128.22   23.49
  -7   6   2   98.09   21.06
   7   6  -2   57.44   17.74
  -7  -6   2   92.59   24.32
  -7  -6   2   66.46   25.11
   7  -6  -2  153.91   33.87
  -7   6   1   99.61   22.56
   7   6  -1   97.13   19.50
  -7  -6   1   75.71   23.50
  -7  -6   1  110.81   19.39
   7  -6  -1  122.79   24.46
  -7   6   0  165.38   38.75
   7   6   0  150.09   30.23
  -7  -6   0  118.50   25.67
  -7  -6   0  146.27   30.39
   7  -6   0  252.21   38.87
  -7   6  -1  142.20   21.84
   7   6   1   67.96   16.16
  -7  -6  -1   71.35   15.07
  -7  -6  -1   75.67   17.54
   7  -6   1   71.12   20.20
   7   6   2   36.37   22.01
  -7   6  -2   35.96   30.77
   7  -6   2   51.38   18.78
  -7  -6  -2   61.96   24.91
  -7   6  -3   66.37   20.37
   7   6   3   29.97   14.78
  -7  -6  -3   25.40   13.62
  -7  -6  -3   84.52   17.96
   7  -6   3  107.49   19.48
  -7   6  -4   55.22   34.16
   7   6   4  107.86   17.27
  -7  -6  -4  127.11   16.28
  -7  -6  -4  117.83   30.48
   7  -6   4  159.80   22.26
  -7   6  -5   67.83   20.80
   7  -6   5   43.36   18.79
  -7  -6  -5   91.79   19.22
  -7  -6  -5    6.83   21.41
  -7   6  -6  152.49   25.25
   7   6   6  155.20   18.68
  -7  -6  -6  170.21   24.48
  -7  -6  -6  194.99   34.71
   7  -6   6  147.27   23.81
  -7   6  -7   -1.71   26.53
   7   6   7  -18.31   17.62
  -7  -6  -7  -13.08   10.77
  -7  -6  -7   -3.75   15.18
   7  -6   7   16.39   14.50
  -7   6  -8   -6.29   17.80
   7   6   8    5.14   11.46
  -7  -6  -8   17.66   10.86
  -7  -6  -8    7.08   15.25
   7  -6   8   14.47   14.87
  -7   6  -9   -6.10   17.73
   7   6   9    2.56   10.79
  -7  -6  -9   12.14   10.96
  -7  -6  -9   19.09   23.81
   7  -6   9   16.69   13.91
  -7   6 -10  -28.49   28.51
   7   6  10   10.41   17.41
  -7  -6 -10    9.70   15.61
  -7  -6 -10   14.85   15.62
   7  -6  10    3.59   14.12
  -7   6 -11   64.28   22.63
   7   6  11   66.23   12.80
  -7  -6 -11   58.34   12.33
  -7  -6 -11   31.01   28.69
   7  -6  11   40.36   16.42
  -7   6 -12   27.25   21.22
   7  -6  12    9.18   16.15
  -7  -6 -12   27.16   18.04
  -7  -6 -12   47.89   11.39
  -7   6 -13   -3.32   31.61
   7  -6  13   12.96   14.31
  -7  -6 -13    2.04   16.59
  -7  -6 -13   36.25   16.74
  -7   6 -14   13.28   21.05
   7  -6  14   20.66   14.43
  -7  -6 -14   17.43   25.32
  -7  -6 -14    6.57    9.68
   7   7  -7   13.39   18.91
   7  -7  -7  -14.48   35.94
  -7  -7   7   18.61   15.77
  -7   7   6   13.17   18.95
   7   7  -6   16.57   19.29
  -7  -7   6   35.29   24.31
  -7  -7   6   17.86   15.74
   7  -7  -6   37.09   22.06
  -7   7   5   21.47   18.11
   7   7  -5    4.98   26.48
  -7  -7   5   -6.77   22.62
  -7  -7   5   10.72   22.81
   7  -7  -5   -1.15   21.37
  -7   7   4   -6.63   28.98
   7   7  -4  -23.74   16.61
  -7  -7   4    1.72   21.40
  -7  -7   4    4.92   14.61
   7  -7  -4   61.95   30.61
  -7   7   3   -4.23   19.06
   7   7  -3   27.98   25.27
  -7  -7   3   14.27   21.97
  -7  -7   3  -36.64   24.47
   7  -7  -3   17.66   19.77
  -7   7   2   37.38   20.34
   7   7  -2    1.98   17.86
  -7  -7   2   43.35   22.19
  -7  -7   2   43.89   17.73
   7  -7  -2   22.39   22.07
  -7   7   1   -8.79   18.86
   7   7  -1   -9.39   23.91
  -7  -7   1   10.62   20.21
  -7  -7   1    3.69   24.20
   7  -7  -1   39.04   29.36
  -7   7   0    6.56   19.65
   7   7   0   10.91   16.77
  -7  -7   0   19.20   14.08
  -7  -7   0    8.16   17.10
   7  -7   0   -0.92   19.73
   7   7   1   28.90   24.58
   7  -7   1   32.89   30.88
  -7  -7  -1   -0.17   13.85
  -7  -7  -1   18.58   17.37
  -7   7  -2    6.69   19.87
   7   7   2    0.76   15.81
  -7  -7  -2   14.79   13.71
  -7  -7  -2   23.14   18.41
   7  -7   2    0.86   18.72
  -7   7  -3    0.98   21.03
   7   7   3   33.24   24.88
  -7  -7  -3   39.34   14.84
  -7  -7  -3   16.37   19.05
   7  -7   3   28.67   20.49
  -7   7  -4    1.63   31.34
   7   7   4   22.61   15.46
  -7  -7  -4   -5.67   13.60
  -7  -7  -4   16.74   28.13
   7  -7   4   12.13   18.56
  -7   7  -5   15.57   20.97
   7   7   5   14.08   23.30
  -7  -7  -5   12.78   21.48
  -7  -7  -5   13.26   19.41
   7  -7   5   10.39   18.73
   8   0 -27   -0.36   11.30
   8   0 -27   14.98   20.44
   8   0 -26  103.00   15.74
   8   0 -26  117.46   17.56
   8   0 -25   11.57   15.68
   8   0 -25   -2.53   11.92
   8   0 -24   37.20   15.10
   8   0 -24   60.12   13.66
   8   0 -23    1.35    8.20
   8   0 -23   21.05   11.28
   8   0 -22   10.98    7.85
   8   0 -22   13.71   10.65
   8   0 -21   -0.19    7.14
   8   0 -21   11.70    9.80
   8   0 -20   52.99   12.05
   8   0 -20   33.95   10.62
   8   0 -19    8.59    9.05
   8   0 -18   33.72    6.32
   8   0 -17    8.53    6.20
   8   0 -17   -0.48    5.08
   8   0 -16    4.52    5.78
   8   0 -16   -1.70    4.76
   8   0 -15    0.03    5.64
   8   0 -15   -3.10    7.36
   8   0 -14 1003.79   31.47
   8   0 -14  971.26   31.33
   8   0 -13    0.61    5.93
   8   0 -13    0.05    3.79
   8   0 -13  -13.58    6.10
   8   0 -12   66.16    4.86
   8   0 -12   60.50    4.60
   8   0 -12   64.14    7.35
   8   0 -11   -2.88    5.16
   8   0 -11    6.83    3.01
   8   0 -11   -2.11    5.18
   8   0 -10   95.39    5.27
   8   0 -10   90.84    4.51
   8   0 -10   93.23    6.82
   8   0  -9    5.25    5.21
   8   0  -9    6.47    4.20
   8   0  -9   -0.46    7.36
   8   0  -8  351.61   10.11
   8   0  -8  333.70    9.32
   8   0  -8  348.41   11.23
   8   0  -7    3.09    5.14
   8   0  -7   -2.54    2.00
   8   0  -7    3.67    5.71
   8   0  -6  691.07   17.43
   8   0  -6  659.92   12.69
   8   0  -6  668.52   20.56
   8   0  -5    1.38    3.55
   8   0  -5   -2.16    1.50
   8   0  -5    1.59    5.01
   8   0  -4   64.00    6.42
   8   0  -4   63.23    2.83
   8   0  -4   72.25    6.11
   8   0  -3   -2.15    3.37
   8   0  -3   -1.33    1.64
   8   0  -3    2.01    3.79
   8   0  -2  790.14   19.61
   8   0  -2  748.87   12.28
   8   0  -2  817.73   18.42
   8   0  -1    0.59    3.67
   8   0  -1    1.12    0.84
   8   0  -1    3.63    2.15
   8   0   0  110.23    5.60
   8   0   0   90.12    2.15
   8   0   1   -2.73    6.09
   8   0   2  718.25   22.98
   8   0   3    0.38    5.88
  -8   0  -3    1.43    1.73
   8   0   4 2283.19   74.30
  -8   0  -4 2457.79   67.76
   8   0   5    2.97    6.03
  -8   0  -5    2.25    3.47
   8   0   6 3481.50  125.70
  -8   0  -6 3426.82  116.09
   8   0   7    3.62    6.34
  -8   0  -7    2.12    4.55
   8   0   8  108.17    6.20
  -8   0  -8  107.78    7.88
   8   0   9    5.69    4.05
  -8   0  -9    1.99    3.70
   8   0  10   50.79    5.14
  -8   0 -10   48.92    7.28
   8   0  11   -3.21    4.12
  -8   0 -11   -5.11    4.40
   8   0  12   88.90    5.92
  -8   0 -12   87.42   10.14
   8   0  13   -0.85    6.06
  -8   0 -13    1.98    7.47
   8   0  14    3.42    4.34
  -8   0 -14    5.13    5.34
   8   0  15   -0.77    4.40
  -8   0 -15   -6.11    6.01
   8   0  16   96.54    6.18
  -8   0 -16   94.53    9.37
   8   0  17   -3.56    7.14
  -8   0 -17    6.04    6.81
   8   0  18  307.60   11.60
  -8   0 -18  315.05   16.32
   8   0  19    1.98    4.99
  -8   0 -19    6.91    7.98
   8   0  20   43.85    9.80
  -8   0 -20   53.83   10.24
   8   0  21    2.16    5.13
  -8   0 -21    6.90    8.89
   8   0  22   11.35    8.44
  -8   0 -22   22.45   10.05
   8   0  23    8.00    5.70
  -8   0 -23    6.18   10.60
   8   0  24   49.06   10.29
  -8   0 -24   50.80   12.46
  -8   0 -25    8.18   11.71
   8   1 -27  117.28   28.91
   8  -1 -27   97.92   19.64
   8  -1 -27  130.71   22.46
   8   1 -26  -11.39   17.84
   8  -1 -26    7.48    8.67
   8  -1 -26   -4.98   14.75
   8   1 -25    7.92   18.33
   8  -1 -25   20.92    8.75
   8  -1 -25   -1.20   15.13
   8   1 -24   -0.69   10.78
   8  -1 -24   12.94    8.14
   8  -1 -24   -0.80   13.96
   8   1 -23   22.57   11.03
   8  -1 -23   24.42   11.71
   8  -1 -23   40.67   13.96
   8   1 -22    4.17    9.20
   8  -1 -22   -4.04    6.73
   8  -1 -22   -4.29   12.49
   8   1 -21   16.29    9.22
   8  -1 -21    5.32    6.64
   8  -1 -21   -7.37   19.09
   8   1 -20   24.59    8.90
   8  -1 -20   18.60   10.17
   8  -1 -20   13.89   12.24
   8   1 -19   21.54    8.31
   8  -1 -19   10.89    5.77
   8  -1 -19   14.71    4.48
   8  -1 -19   34.23   11.10
   8   1 -18   97.89   14.67
   8  -1 -18   69.00    7.08
   8  -1 -18   79.67    6.41
   8  -1 -18   93.63   12.87
   8   1 -17   13.61   11.36
   8  -1 -17   20.73    5.33
   8  -1 -17   14.79    4.71
   8  -1 -17   43.23    9.94
   8   1 -16   96.97   13.29
   8  -1 -16   75.10    9.20
   8  -1 -16   87.43    5.92
   8  -1 -16  108.40   12.15
   8   1 -15   47.55    9.93
   8  -1 -15   31.56    5.24
   8  -1 -15   34.28    4.92
   8  -1 -15   46.05   10.32
   8   1 -14  890.32   35.12
   8   1 -14  837.76   31.98
   8  -1 -14  791.25   23.63
   8  -1 -14  916.28   24.72
   8  -1 -14  891.40   36.12
   8   1 -13   89.74    7.59
   8   1 -13   88.19   10.98
   8  -1 -13   87.32    8.49
   8  -1 -13   98.43    4.49
   8  -1 -13   70.33   15.89
   8   1 -12   76.02    9.76
   8   1 -12   80.44    9.56
   8  -1 -12   67.29    5.27
   8  -1 -12   70.04    4.04
   8  -1 -12   80.30    9.77
  -8  -1  12   68.33    4.28
   8   1 -11  521.18   18.57
   8   1 -11  595.06   21.20
   8  -1 -11  583.80   16.29
   8  -1 -11  528.99   23.01
  -8  -1  11  530.31   13.63
   8   1 -10  799.99   25.28
   8   1 -10  926.48   24.62
   8  -1 -10  864.64   20.73
   8  -1 -10  838.71   38.27
  -8  -1  10  854.93   24.64
   8   1  -9   72.59    6.70
   8   1  -9   75.44    5.09
   8  -1  -9   84.65    6.70
   8  -1  -9   83.65    8.71
  -8  -1   9   83.87    6.76
   8   1  -8   27.75    8.08
   8   1  -8   40.72    5.76
   8  -1  -8   34.96    3.75
   8  -1  -8   27.07   10.65
  -8  -1   8   29.11    6.20
   8   1  -7   -0.13    4.74
   8   1  -7    0.59    3.04
   8  -1  -7    5.58    3.19
   8  -1  -7    2.54    5.63
  -8  -1   7    1.12    5.19
   8   1  -6   -4.43    7.18
   8   1  -6    5.02    4.06
   8  -1  -6    1.54    5.13
  -8  -1   6   -3.74    5.20
   8   1  -5   46.80    5.45
   8   1  -5   49.97    4.70
   8  -1  -5   39.27    5.97
  -8  -1   5   46.00    6.63
   8   1  -4  235.51    9.72
   8   1  -4  260.98    7.69
   8  -1  -4  224.40   10.08
  -8  -1   4  257.71   11.12
   8   1  -3   97.48    6.96
   8   1  -3   98.69    4.43
  -8   1   3   93.21    7.34
  -8  -1   3  110.74    8.02
   8  -1  -3   93.05    9.40
   8   1  -2 1152.77   39.00
   8   1  -2 1313.14   27.80
   8   1  -2 1174.34   21.70
  -8   1   2 1108.36   35.33
   8  -1  -2 1228.09   39.93
  -8  -1   2 1257.83   36.72
   8   1  -1  140.36    7.52
  -8   1   1  121.47    6.02
  -8  -1   1  129.53    8.83
   8  -1  -1  140.94    6.57
   8   1   0 1132.67   33.11
  -8   1   0 1181.14   35.37
  -8  -1   0 1138.76   29.53
   8  -1   0 1111.85   29.87
   8   1   1  487.16   15.02
  -8   1  -1  442.86   13.66
  -8  -1  -1  480.61   13.08
   8  -1   1  455.82   12.79
   8   1   2  116.16    7.11
  -8   1  -2  110.14    5.97
  -8  -1  -2  121.20    6.16
   8  -1   2  108.64    7.07
   8   1   3   37.28    5.88
  -8   1  -3   40.31    6.83
  -8  -1  -3   34.38    4.76
   8  -1   3   35.36    5.47
   8   1   4  965.38   28.13
  -8   1  -4  914.86   33.22
   8  -1   4  958.85   24.01
   8   1   5   58.72    5.93
  -8   1  -5   37.62    8.27
  -8  -1  -5   49.39    2.07
   8  -1   5   54.64    5.54
  -8  -1  -5   57.36    2.82
   8   1   6  237.11    9.95
  -8   1  -6  224.90   10.16
  -8  -1  -6  255.40    6.08
   8  -1   6  242.92    9.36
  -8  -1  -6  253.19    7.61
   8   1   7   53.49    5.77
  -8   1  -7   37.99    5.62
  -8  -1  -7   47.33    2.39
   8  -1   7   55.22    5.49
  -8  -1  -7   45.35    4.78
   8   1   8   24.07    5.28
  -8   1  -8   29.71    5.78
  -8  -1  -8   21.98    3.84
   8  -1   8   23.07    4.88
  -8  -1  -8   29.94    3.48
   8   1   9  108.27    7.26
  -8   1  -9   99.54    7.75
  -8  -1  -9   98.94    5.41
   8  -1   9  111.62    4.69
  -8  -1  -9  104.13    7.32
   8   1  10   62.32    6.14
  -8   1 -10   73.58   10.64
  -8  -1 -10   60.34    3.72
   8  -1  10   69.83    5.53
  -8  -1 -10   58.39    7.69
   8   1  11   25.04    5.35
  -8   1 -11   25.34    6.71
  -8  -1 -11   18.04    3.42
   8  -1  11   21.56    3.43
  -8  -1 -11   27.60    6.69
   8   1  12  143.95   11.29
  -8   1 -12  137.42   14.71
  -8  -1 -12  148.03    6.23
   8  -1  12  154.02    5.86
  -8  -1 -12  164.01    7.74
   8   1  13   16.73    7.49
  -8   1 -13    8.25    6.82
   8  -1  13   10.80    4.39
  -8  -1 -13    6.78    3.94
   8  -1  13   10.19    3.50
  -8  -1 -13    8.26    5.25
   8   1  14  115.36   11.46
  -8   1 -14  107.97   15.55
   8  -1  14  115.94    6.57
  -8  -1 -14   98.06    6.15
   8  -1  14   97.48    7.98
  -8  -1 -14  103.56   11.74
   8   1  15   71.88    7.15
  -8   1 -15   59.49   14.33
   8  -1  15   85.22    5.88
  -8  -1 -15   69.26    6.04
   8  -1  15   77.72    5.27
  -8  -1 -15   74.45   11.00
   8   1  16   51.87    6.78
  -8   1 -16   50.39   10.02
   8  -1  16   69.58    8.20
  -8  -1 -16   50.26    9.14
   8  -1  16   69.54    7.82
  -8  -1 -16   67.61   11.46
   8   1  17  121.13   12.19
  -8   1 -17  147.26   13.33
   8  -1  17  143.47    7.81
  -8  -1 -17  122.44   11.90
   8  -1  17  147.71    7.54
  -8  -1 -17  146.28   15.01
   8   1  18   -2.37    5.79
  -8   1 -18   -6.31    9.06
   8  -1  18    1.73    4.51
  -8  -1 -18    3.42    9.10
   8  -1  18    5.60    4.74
  -8  -1 -18    8.91   10.21
   8   1  19  136.77   10.27
  -8   1 -19  164.05   15.38
  -8  -1 -19  145.11   15.31
   8  -1  19  156.18   11.22
  -8  -1 -19  191.81   17.89
   8   1  20  242.08   17.52
  -8   1 -20  255.67   19.75
  -8  -1 -20  243.63   14.49
   8  -1  20  285.58   11.10
  -8  -1 -20  297.18   22.73
   8   1  21   55.98    8.05
  -8   1 -21   68.66   13.57
  -8  -1 -21   59.64    9.30
   8  -1  21   64.36    8.88
  -8  -1 -21   64.73   10.49
   8   1  22    3.66    9.30
  -8   1 -22    2.14   11.21
  -8  -1 -22   -3.30    7.64
   8  -1  22    2.98    7.52
  -8  -1 -22    0.97    8.62
   8   1  23   35.70   11.48
  -8   1 -23   34.97   13.30
  -8  -1 -23   30.22    9.49
   8  -1  23   23.00    5.55
  -8  -1 -23   48.94   10.32
   8   1  24   -2.78    9.70
  -8   1 -24   14.34   12.54
  -8  -1 -24    3.95   13.38
   8  -1  24   -1.15    7.93
  -8  -1 -24    2.28    9.73
  -8   1 -25   28.74   14.37
  -8  -1 -25   33.65   16.66
   8  -1  25   14.27    5.52
  -8  -1 -25   18.74   11.54
   8   2 -26  -12.80   14.77
   8  -2 -26  -10.52   27.29
   8   2 -25   22.13   14.86
   8  -2 -25   35.77   13.81
   8  -2 -25   18.73   27.89
   8   2 -24   20.98   13.52
   8  -2 -24   16.01    7.82
   8  -2 -24   21.38   25.12
   8   2 -23   63.56   14.51
   8  -2 -23   53.19    8.61
   8  -2 -23   57.86   26.74
   8   2 -22   23.85   12.27
   8  -2 -22   22.82   11.31
   8  -2 -22   13.37   23.03
   8   2 -21   16.38   10.55
   8  -2 -21    0.10    6.23
   8  -2 -21   -8.76   21.93
   8   2 -20   12.55    9.85
   8  -2 -20    1.57    5.95
   8  -2 -20    4.55    2.12
   8  -2 -20  -10.83   21.28
  -8  -2  20    9.29    4.62
   8   2 -19   22.08    9.79
   8  -2 -19    4.66    9.11
   8  -2 -19    7.27    3.57
   8  -2 -19   24.93   20.59
  -8  -2  19   11.21    5.18
   8   2 -18   30.64    9.45
   8  -2 -18   11.63    6.07
   8  -2 -18   15.29    2.59
   8  -2 -18    9.68   12.96
  -8  -2  18   13.62    3.68
   8   2 -17  114.90   12.04
   8  -2 -17  108.34    7.85
   8  -2 -17   98.56    4.13
   8  -2 -17  107.41   15.45
  -8  -2  17  104.82    8.16
   8   2 -16  849.53   33.83
   8  -2 -16  804.26   22.00
   8  -2 -16  823.17   42.02
  -8  -2  16  789.92   22.82
   8   2 -15   41.19   13.54
   8  -2 -15   41.37    5.28
   8  -2 -15   57.02   12.49
  -8  -2  15   49.09    4.83
  -8  -2  15   44.70    5.77
   8   2 -14    2.10   11.13
   8  -2 -14    8.98    3.04
   8  -2 -14    1.47   16.65
  -8  -2  14   -0.34    6.04
  -8  -2  14    0.20    6.67
   8   2 -13   84.70   14.38
   8  -2 -13   62.84   13.47
  -8  -2  13   80.30    8.91
  -8  -2  13   94.09    8.25
   8   2 -12   64.15    8.06
   8  -2 -12   70.86   11.49
  -8  -2  12   47.37    5.36
  -8  -2  12   53.79    4.71
   8   2 -11   24.95    6.68
   8  -2 -11   21.64   16.15
  -8  -2  11   25.10    4.97
  -8  -2  11   31.32    3.80
   8   2 -10  177.17   11.06
   8   2 -10  184.54   14.66
   8  -2 -10  163.90   14.54
  -8  -2  10  166.78    7.93
  -8  -2  10  169.43    8.06
   8   2  -9  234.59   18.39
   8   2  -9  228.74   11.17
   8  -2  -9  214.18   22.55
  -8  -2   9  222.96    9.15
  -8  -2   9  248.87    6.90
   8   2  -8   30.83    7.69
   8   2  -8   39.63    9.41
   8  -2  -8   35.66    9.19
  -8  -2   8   41.75    5.38
  -8  -2   8   42.65    3.22
   8   2  -7   68.85    8.24
   8   2  -7   63.40    9.17
  -8   2   7   50.96    7.24
   8  -2  -7   56.01    9.41
  -8  -2   7   69.54    4.79
  -8  -2   7   64.08    5.76
   8   2  -6   61.44   12.53
   8   2  -6   71.45    8.88
  -8   2   6   59.43    7.49
  -8  -2   6   63.79    5.75
   8  -2  -6   65.05   13.66
   8   2  -5   20.43    6.21
   8   2  -5    7.22    6.35
  -8   2   5    5.75    5.97
  -8  -2   5    5.63    4.44
   8  -2  -5    8.81   10.59
   8   2  -4   58.01    7.76
   8   2  -4   50.26    7.35
  -8   2   4   51.12   11.64
   8  -2  -4   50.49    8.33
  -8  -2   4   58.39    2.63
  -8  -2   4   63.06    5.66
   8   2  -3   11.39    6.73
   8   2  -3    8.78    5.59
  -8   2   3    6.59    9.85
   8  -2  -3    0.48    6.60
  -8  -2   3    9.46    2.96
  -8  -2   3   12.05    4.66
   8   2  -2  343.37   21.03
   8   2  -2  339.02   12.22
  -8   2   2  286.45   20.60
  -8  -2   2  335.16    7.96
  -8  -2   2  344.38   12.05
   8   2  -1 1096.25   44.30
  -8   2   1 1076.71   47.87
   8   2  -1 1118.22   29.86
  -8  -2   1 1175.74   33.76
  -8  -2   1 1127.27   25.17
   8  -2  -1 1062.38   46.74
   8   2   0  134.75    9.96
   8   2   0  134.92    6.21
  -8  -2   0  147.47    7.82
  -8  -2   0  149.32    5.00
   8   2   1  205.88   12.01
   8   2   1  227.27    7.51
  -8   2  -1  281.80   18.16
  -8  -2  -1  232.19   13.60
   8   2   2  116.94    9.14
   8   2   2  101.39    4.53
   8  -2   2  106.86    8.50
  -8  -2  -2  109.09    9.79
  -8  -2  -2  107.11    4.78
   8   2   3  831.51   29.84
  -8   2  -3  758.37   38.94
   8  -2   3  840.88   28.77
  -8  -2  -3  893.26   22.53
  -8  -2  -3  846.72   24.12
   8   2   4  183.54   11.21
  -8   2  -4  175.15   11.80
   8  -2   4  169.14   13.50
  -8  -2  -4  175.22    8.23
  -8  -2  -4  180.61    8.20
   8   2   5    4.97    6.30
  -8   2  -5   -1.81   10.39
   8  -2   5    2.21    8.18
  -8  -2  -5    2.61    5.09
  -8  -2  -5   -1.90    4.51
   8   2   6  660.15   24.03
  -8   2  -6  569.69   32.16
  -8  -2  -6  666.36   24.22
   8  -2   6  611.97   26.07
  -8  -2  -6  660.67   23.21
   8   2   7   84.82    8.76
  -8   2  -7   69.10   14.51
   8  -2   7   85.87    7.19
  -8  -2  -7   81.17    3.85
  -8  -2  -7   90.23    6.41
  -8  -2  -7   91.47    8.86
   8   2   8  153.53   10.66
  -8   2  -8  161.31   11.88
   8  -2   8  147.53    8.69
  -8  -2  -8  146.43    5.32
  -8  -2  -8  164.87    8.06
  -8  -2  -8  168.96    8.59
   8   2   9   33.81    6.97
  -8   2  -9   28.68    7.91
   8  -2   9   21.99    5.25
  -8  -2  -9   21.27    3.56
  -8  -2  -9   28.47    7.84
  -8  -2  -9   24.18    5.40
   8   2  10   52.77    7.74
  -8   2 -10   37.37   13.79
   8  -2  10   41.89    8.81
  -8  -2 -10   43.53    4.38
  -8  -2 -10   55.62    5.60
  -8  -2 -10   49.49    9.44
   8   2  11  106.93    9.42
  -8   2 -11  120.10   12.11
   8  -2  11  123.17   11.39
  -8  -2 -11  112.02    4.30
  -8  -2 -11  124.67    7.03
  -8  -2 -11  125.53   12.51
   8   2  12   -1.06    6.11
  -8   2 -12   -3.07   12.76
  -8  -2 -12   -1.58    3.90
   8  -2  12    5.35    4.48
  -8  -2 -12    0.69    5.75
   8   2  13   42.98   11.61
  -8   2 -13   45.76   10.79
  -8  -2 -13   51.29    3.80
   8  -2  13   44.29    8.15
  -8  -2 -13   51.42   11.80
   8   2  14   17.96   10.34
  -8   2 -14   -3.96    9.48
  -8  -2 -14    3.69    3.29
   8  -2  14    8.37    4.82
  -8  -2 -14    4.58    6.76
   8   2  15   72.48    8.99
  -8   2 -15   77.62   18.97
  -8  -2 -15   65.23    7.10
   8  -2  15   85.00    9.39
  -8  -2 -15   86.27    9.24
   8   2  16    3.30    7.02
  -8   2 -16   36.73   15.87
  -8  -2 -16    5.21    6.35
   8  -2  16    8.30    5.11
  -8  -2 -16   15.70   12.03
   8   2  17   17.08    7.39
  -8   2 -17   21.83   11.18
  -8  -2 -17    9.45    4.60
   8  -2  17   23.53    8.11
  -8  -2 -17   28.70   13.30
   8   2  18   26.41   11.58
  -8   2 -18   20.17   11.97
  -8  -2 -18   17.66    4.95
   8  -2  18   13.35    5.73
  -8  -2 -18   21.22   13.34
   8   2  19    5.26    7.31
  -8   2 -19    5.38   11.71
  -8  -2 -19   -5.94    8.39
   8  -2  19    7.21    8.76
  -8  -2 -19   14.19   13.20
   8   2  20  193.91   13.89
  -8   2 -20  208.58   31.61
  -8  -2 -20  214.71   11.33
   8  -2  20  235.80   11.77
  -8  -2 -20  201.21   16.77
   8   2  21    6.23   12.48
  -8   2 -21    6.28   20.01
   8  -2  21    6.31    5.56
  -8  -2 -21   -1.12    6.36
   8  -2  21    9.73    6.20
  -8  -2 -21   14.02    9.78
   8   2  22   61.62   10.63
  -8   2 -22   73.61   25.04
   8  -2  22   77.22   10.53
  -8  -2 -22   62.47   12.60
   8  -2  22   82.61   12.73
  -8  -2 -22   91.74   13.41
  -8   2 -23  -10.35   20.96
   8  -2  23    2.69    5.33
  -8  -2 -23  -11.15   12.25
   8  -2  23   -7.61    6.83
  -8  -2 -23   -7.03   11.11
  -8   2 -24    5.41   24.06
  -8  -2 -24   33.68    9.14
   8  -2  24   14.32    8.91
  -8  -2 -24   18.99   12.56
   8   3 -24   19.74   16.77
   8  -3 -24   29.37    8.97
   8  -3 -24    0.88   19.80
   8   3 -23   22.09   16.15
   8  -3 -23   49.11   13.15
   8  -3 -23    9.77   20.03
   8   3 -22    1.59   13.20
   8  -3 -22   -9.91    7.29
   8  -3 -22  -18.57   16.02
  -8  -3  22    3.64    3.96
  -8  -3  22   -5.00    6.74
   8   3 -21   30.81   13.60
   8  -3 -21   14.58    7.59
   8  -3 -21    6.51   16.88
  -8  -3  21   11.89    7.28
  -8  -3  21   28.95    6.85
   8   3 -20    5.26   12.88
   8  -3 -20    6.50    3.69
   8  -3 -20   29.24   23.18
  -8  -3  20   10.41    5.07
  -8  -3  20    6.02    9.35
   8   3 -19   15.77   12.56
   8  -3 -19   13.30    4.43
   8  -3 -19   23.46   25.07
  -8  -3  19   23.95    5.55
  -8  -3  19   28.40    9.36
   8   3 -18   72.54   21.21
   8  -3 -18   88.47   18.53
  -8  -3  18   61.65   11.26
  -8  -3  18   82.17    7.45
   8   3 -17   16.73   16.95
   8  -3 -17   24.98   14.53
  -8  -3  17    8.30    5.72
  -8  -3  17   12.23    5.30
   8   3 -16   58.62   18.84
   8  -3 -16   34.30   14.79
  -8  -3  16   40.61    6.68
  -8  -3  16   45.68    9.12
   8   3 -15    5.63   10.24
   8  -3 -15    8.59   12.98
  -8  -3  15    8.03    5.91
  -8  -3  15   13.96    4.92
   8   3 -14    4.60    9.32
   8  -3 -14   -7.35   19.16
  -8  -3  14   -0.97    8.58
  -8  -3  14    4.43    4.46
   8   3 -13   77.97   17.85
   8  -3 -13   89.12   15.88
  -8  -3  13   79.36   12.94
  -8  -3  13  108.16    9.72
   8   3 -12  100.53   12.89
   8  -3 -12  131.72   16.09
  -8  -3  12  104.11    9.48
  -8  -3  12  126.35    6.71
   8   3 -11  216.93   15.50
   8  -3 -11  235.17   28.97
  -8  -3  11  226.53   12.37
  -8  -3  11  231.97   11.95
   8   3 -10  230.92   20.89
  -8   3  10  179.18   14.08
  -8  -3  10  211.39   11.72
   8  -3 -10  187.28   18.17
   8   3  -9   46.95    9.24
  -8   3   9   65.24   15.27
   8  -3  -9   29.33   18.97
  -8  -3   9   42.88    7.13
  -8  -3   9   42.60    7.39
   8   3  -8   61.41    8.83
  -8   3   8   32.40    9.60
   8  -3  -8   42.22   11.87
  -8  -3   8   42.48    4.86
  -8  -3   8   33.87    7.20
   8   3  -7   68.20   12.72
  -8   3   7   35.27   10.30
   8  -3  -7   46.04   18.13
  -8  -3   7   52.27    6.99
  -8  -3   7   64.06    7.38
   8   3  -6   99.99   13.61
  -8   3   6   91.04   18.74
   8  -3  -6  105.85   13.02
  -8  -3   6  108.57    6.20
  -8  -3   6  106.72    8.76
   8   3  -5  287.36   19.25
  -8   3   5  264.01   17.13
   8  -3  -5  282.80   19.07
  -8  -3   5  318.54   14.18
  -8  -3   5  292.27   13.94
   8   3  -4  161.56   14.81
  -8   3   4  164.73   13.52
   8  -3  -4  163.86   22.14
  -8  -3   4  154.59    9.71
  -8  -3   4  156.16   10.24
   8   3  -3   92.27   11.00
  -8   3   3   78.62   11.09
   8   3  -3   83.86   11.42
  -8  -3   3   82.09    8.37
  -8  -3   3   75.92    5.47
   8  -3  -3   63.45   18.10
   8   3  -2   79.89   10.71
  -8   3   2   43.51   17.52
   8   3  -2   66.28    7.09
  -8  -3   2   73.67    8.04
  -8  -3   2   62.04    5.52
   8  -3  -2   77.95   11.35
   8   3  -1    5.48    8.67
  -8   3   1    9.04    9.13
   8   3  -1   -5.47    5.11
  -8  -3   1    4.56    6.04
  -8  -3   1    3.20    3.97
   8  -3  -1   21.90    8.23
   8   3   0   -2.66    8.63
  -8   3   0    3.20    8.14
   8   3   0    1.46    7.39
  -8  -3   0  -10.72    9.45
  -8  -3   0    1.81    4.00
   8  -3   0    8.14    7.73
   8   3   1  134.73   18.27
  -8   3  -1  134.60   12.22
   8   3   1  122.33    7.70
  -8  -3  -1  131.75   12.60
  -8  -3  -1  104.81    7.04
   8  -3   1  117.71   11.89
   8   3   2   12.16   14.75
   8   3   2   11.69    8.21
  -8  -3  -2   14.59    6.36
  -8  -3  -2   32.54    7.83
   8   3   3  174.89   20.18
  -8   3  -3  165.56   21.24
   8   3   3  186.95   11.89
  -8  -3  -3  200.68   10.75
  -8  -3  -3  197.47   14.22
   8  -3   3  174.97   19.74
   8   3   4   30.07   14.29
   8   3   4   34.22    5.06
  -8   3  -4   18.22   10.03
  -8  -3  -4   45.86    9.62
  -8  -3  -4   29.28    6.59
   8   3   5  575.82   33.39
  -8   3  -5  516.11   27.99
   8   3   5  542.97   21.86
  -8  -3  -5  596.85   27.07
  -8  -3  -5  597.60   22.74
   8  -3   5  539.83   24.37
   8   3   6  122.56   18.05
  -8   3  -6  163.14   21.27
   8  -3   6  129.82   11.28
  -8  -3  -6  122.26   10.05
  -8  -3  -6  113.51    8.52
   8   3   7  231.41   20.86
  -8   3  -7  175.42   16.95
   8  -3   7  219.40   13.28
  -8  -3  -7  208.05   13.41
  -8  -3  -7  227.90   11.25
   8   3   8  105.93   16.87
  -8   3  -8  108.25   13.32
  -8  -3  -8  110.95    8.38
   8  -3   8   84.77   14.86
  -8  -3  -8  102.26   10.32
   8   3   9   25.33   13.41
  -8   3  -9   13.80   10.74
  -8  -3  -9   18.39    8.58
   8  -3   9   29.10    7.95
  -8  -3  -9   28.11    7.69
   8   3  10    5.90   12.86
  -8   3 -10   -5.39    9.85
  -8  -3 -10    1.74    5.08
   8  -3  10   11.43    6.89
  -8  -3 -10    6.74   10.55
   8   3  11    6.31   12.32
  -8   3 -11  -16.23   10.14
  -8  -3 -11    3.39    4.98
   8  -3  11  -10.01    9.88
  -8  -3 -11   -0.42   11.17
   8   3  12  112.43   12.04
  -8   3 -12   98.26   21.05
  -8  -3 -12   97.14   10.60
   8  -3  12   99.23   10.02
  -8  -3 -12   88.05   10.77
   8   3  13   51.76   10.39
  -8   3 -13   41.61   12.98
   8  -3  13   66.57    8.22
  -8  -3 -13   47.17    4.37
  -8  -3 -13   55.47    6.18
  -8  -3 -13   57.84   14.37
   8   3  14   35.63    9.80
  -8   3 -14   34.44   19.77
   8  -3  14   37.38   12.15
  -8  -3 -14   28.05    6.24
  -8  -3 -14   36.84    8.82
  -8  -3 -14   27.15    9.23
   8   3  15   -3.43    8.38
  -8   3 -15    0.43   18.21
   8  -3  15    2.97    6.30
  -8  -3 -15   -2.95    3.68
  -8  -3 -15   -1.86    4.90
  -8  -3 -15    4.63    8.39
  -8   3 -16   79.35   16.37
  -8  -3 -16   75.61    8.59
   8  -3  16  100.16   13.65
  -8  -3 -16   66.44   17.32
  -8   3 -17   12.25   13.24
  -8  -3 -17    3.68    4.14
   8  -3  17   -3.49    6.38
  -8  -3 -17    8.50    9.52
  -8   3 -18   13.59   20.63
  -8  -3 -18    1.51    6.73
   8  -3  18   -1.92   10.39
  -8  -3 -18   -3.28    9.88
  -8   3 -19    6.86   21.50
  -8  -3 -19    0.37    7.90
   8  -3  19   12.78    6.54
  -8  -3 -19    2.56   10.78
  -8   3 -20    5.69   21.87
  -8  -3 -20    0.84    5.30
   8  -3  20    7.44   10.71
  -8  -3 -20    1.60   17.13
  -8   3 -21    4.17   15.34
  -8  -3 -21   10.87    8.64
   8  -3  21    3.26    6.87
  -8  -3 -21    5.92   17.74
  -8   3 -22   -4.84   15.26
  -8  -3 -22   -3.13   10.09
   8  -3  22    0.58    7.19
  -8  -3 -22   -0.33   17.97
  -8   3 -23   52.08   19.03
  -8  -3 -23   21.23    8.05
   8  -3  23   38.37   13.02
  -8  -3 -23   28.27   21.45
   8   4 -22   54.38   19.46
   8  -4 -22   65.09   22.41
  -8  -4  22   34.49   13.39
  -8  -4  22   47.56    8.95
   8   4 -21   10.42   16.59
   8  -4 -21   29.17   19.86
  -8  -4  21   15.50    8.06
  -8  -4  21   22.32    7.59
   8   4 -20   31.99   16.28
   8  -4 -20   43.01   18.71
  -8  -4  20    9.61   12.48
  -8  -4  20   13.76   11.03
   8   4 -19   27.87   16.65
   8  -4 -19   50.40   20.07
  -8  -4  19   44.76   15.03
  -8  -4  19   48.18    7.81
   8   4 -18   28.17   21.04
   8  -4 -18    4.60   25.19
  -8  -4  18    5.45    8.42
  -8  -4  18    4.44    6.01
   8   4 -17   10.21   21.12
   8  -4 -17  -25.92   25.65
  -8  -4  17   11.64    8.36
  -8  -4  17    6.73    9.74
   8   4 -16   50.27   14.40
   8  -4 -16   34.05   17.12
  -8  -4  16   15.27   13.61
  -8  -4  16   23.64    6.83
   8   4 -15   -1.37   12.47
   8  -4 -15   -8.92   14.96
  -8  -4  15   -7.39   13.43
  -8  -4  15   -8.48    5.77
   8   4 -14  105.42   25.15
   8  -4 -14  113.43   20.60
  -8  -4  14  133.90   18.85
  -8  -4  14  136.00    9.35
   8   4 -13    8.17   11.97
   8  -4 -13   16.03   23.27
  -8  -4  13   13.26    8.42
  -8  -4  13    5.15    5.65
   8   4 -12   68.68   14.46
  -8   4  12   63.31   12.20
   8  -4 -12   70.42   17.57
  -8  -4  12   85.23   11.50
  -8  -4  12   82.36   10.95
   8   4 -11   -5.52   16.82
  -8   4  11  -11.46   16.41
   8  -4 -11   -3.13   20.22
  -8  -4  11    5.92    6.00
  -8  -4  11   13.26    8.14
   8   4 -10  398.40   25.28
  -8   4  10  338.96   23.65
   8  -4 -10  415.22   30.05
  -8  -4  10  490.82   24.09
  -8  -4  10  440.27   20.98
   8   4  -9   74.17   18.53
  -8   4   9   25.48   20.06
   8  -4  -9   41.96   15.82
  -8  -4   9   64.08    7.54
  -8  -4   9   63.86    9.79
   8   4  -8  162.16   15.94
  -8   4   8  128.93   16.15
   8  -4  -8  162.75   29.16
  -8  -4   8  170.50   15.19
  -8  -4   8  191.70   12.99
   8   4  -7   18.11   14.75
  -8   4   7   12.32   10.35
   8  -4  -7  -19.39   12.47
  -8  -4   7    8.67    5.93
  -8  -4   7   12.72    7.93
   8   4  -6   10.62   14.81
  -8   4   6   15.78   16.30
   8  -4  -6   -2.39   19.07
  -8  -4   6   24.61    9.78
  -8  -4   6    7.86    8.28
   8   4  -5    1.80    9.09
  -8   4   5   18.49   10.90
   8  -4  -5   21.61   12.03
  -8  -4   5   18.16    9.43
  -8  -4   5   18.11    8.33
   8   4  -4   34.69    9.47
  -8  -4   4   33.08    8.69
  -8  -4   4   22.74    6.89
  -8   4   3  308.36   22.26
   8   4  -3  306.56   17.90
  -8  -4   3  330.59   17.04
  -8  -4   3  305.71   20.67
   8  -4  -3  294.72   33.43
  -8   4   2   -1.44   10.56
   8   4  -2   14.90    7.21
  -8  -4   2   -9.76    7.74
  -8  -4   2  -19.64    9.55
   8  -4  -2   14.86   10.63
  -8   4   1  -10.08   18.85
   8   4  -1   30.26   12.65
  -8  -4   1   27.21    9.43
  -8  -4   1   31.54    7.62
   8  -4  -1   41.37   12.90
  -8   4   0   30.37   13.11
   8   4   0   29.97   13.62
  -8  -4   0   87.38   14.92
  -8  -4   0   33.68    8.86
   8  -4   0   61.91   19.60
   8   4   1  -12.91   11.22
   8  -4   1   21.23   10.34
  -8  -4  -1   21.49   12.37
  -8  -4  -1  -29.24   12.82
  -8   4  -2  467.89   30.52
   8   4   2  466.06   28.65
  -8  -4  -2  539.61   29.36
  -8  -4  -2  555.39   34.15
   8  -4   2  570.48   30.94
  -8   4  -3  111.32   16.82
  -8  -4  -3  196.16   19.25
  -8  -4  -3  117.04   11.21
  -8   4  -4  107.43   22.89
   8   4   4   91.99   13.88
  -8  -4  -4   81.12   10.10
  -8  -4  -4   74.76   11.13
   8  -4   4   63.36   13.01
   8   4   5  209.43   17.30
  -8   4  -5  133.49   18.54
  -8  -4  -5  148.61   15.50
  -8  -4  -5  193.36   12.83
  -8   4  -6  309.79   36.95
   8   4   6  304.02   22.50
  -8  -4  -6  348.96   23.73
  -8  -4  -6  277.19   22.44
   8  -4   6  361.88   32.59
  -8   4  -7  238.35   25.38
   8   4   7  286.01   20.74
  -8  -4  -7  314.18   15.66
  -8  -4  -7  252.93   30.15
   8  -4   7  299.11   21.41
  -8   4  -8  557.61   51.61
   8   4   8  597.49   24.89
  -8  -4  -8  684.40   26.90
  -8  -4  -8  625.99   46.23
   8  -4   8  664.09   33.38
  -8   4  -9   31.95   14.39
   8  -4   9   17.71   16.76
  -8  -4  -9   33.15   10.73
  -8  -4  -9   24.94    7.76
  -8   4 -10    0.88   21.21
  -8  -4 -10   41.26   11.41
   8  -4  10   31.09   10.57
  -8  -4 -10   26.83   16.77
  -8   4 -11   48.78   14.66
  -8  -4 -11   29.02    7.32
   8  -4  11   34.20   15.27
  -8  -4 -11   31.84   11.49
  -8   4 -12  -11.34   13.40
  -8  -4 -12   -1.98    6.34
   8  -4  12   -7.83    9.10
  -8  -4 -12    5.57   15.15
  -8   4 -13    7.91   21.71
  -8  -4 -13   12.71    9.45
   8  -4  13    9.04    8.94
  -8  -4 -13   11.34   10.42
  -8   4 -14   -1.74   14.15
  -8  -4 -14    1.90    5.85
   8  -4  14    8.95    9.05
  -8  -4 -14   27.00   15.82
  -8   4 -15    6.69   14.86
  -8  -4 -15    5.63    9.53
   8  -4  15    1.15    8.90
  -8  -4 -15   14.18   10.87
  -8   4 -16   59.98   26.76
   8  -4  16   40.47   10.48
  -8  -4 -16   35.32    5.78
  -8  -4 -16   36.17    6.83
  -8  -4 -16   33.64   12.93
  -8   4 -17   21.06   22.78
   8  -4  17    5.13    7.96
  -8  -4 -17    2.49    7.33
  -8  -4 -17   -7.59    5.92
  -8  -4 -17   12.28   16.68
  -8   4 -18    6.97   16.85
   8  -4  18   -0.19    8.72
  -8  -4 -18   10.05    5.33
  -8  -4 -18   12.50    6.00
  -8  -4 -18    3.59   12.35
  -8   4 -19    8.70   18.49
   8  -4  19   24.57    9.18
  -8  -4 -19   18.68    6.16
  -8  -4 -19   24.74    6.56
  -8  -4 -19   24.07   13.83
  -8   4 -20  -12.50   17.36
  -8  -4 -20    3.95    9.10
   8  -4  20    4.56    8.66
  -8  -4 -20    6.84   13.42
  -8   4 -21   69.47   32.88
  -8  -4 -21   40.95    7.83
   8  -4  21   60.67   15.29
  -8  -4 -21   73.80   24.97
   8   5 -19   95.81   24.13
   8  -5 -19  105.94   27.53
  -8  -5  19  129.18   22.51
  -8  -5  19  107.53   11.45
   8   5 -18   -8.79   17.09
   8  -5 -18   10.46   19.62
  -8  -5  18   11.25   17.11
  -8  -5  18   -2.19    7.33
   8   5 -17   -2.88   25.79
   8  -5 -17    0.28   19.10
  -8  -5  17   -0.62   11.19
  -8  -5  17  -14.60   10.98
   8   5 -16    8.27   15.99
   8  -5 -16   33.03   29.81
  -8  -5  16    0.16   11.19
  -8  -5  16   13.87    7.79
   8   5 -15   16.78   16.82
   8  -5 -15   24.96   31.29
  -8  -5  15   39.58   11.45
  -8  -5  15   31.63    8.29
   8   5 -14   43.67   24.63
  -8   5  14   47.42   13.10
   8  -5 -14   -7.77   19.61
  -8  -5  14   28.60    8.84
  -8  -5  14   46.54   17.45
   8   5 -13   42.88   27.03
  -8   5  13   38.75   14.45
   8  -5 -13   56.01   20.78
  -8  -5  13   65.69    9.60
  -8  -5  13   68.26   17.92
   8   5 -12  346.10   30.09
  -8   5  12  322.27   26.01
   8  -5 -12  344.94   48.70
  -8  -5  12  383.92   27.57
  -8  -5  12  374.70   33.71
   8   5 -11    7.69   21.15
  -8   5  11   -6.20   12.57
   8  -5 -11   -4.26   16.69
  -8  -5  11   16.84    8.16
  -8  -5  11   -1.66   16.25
   8   5 -10   85.36   16.55
  -8   5  10   71.37   23.16
   8  -5 -10   48.64   20.07
  -8  -5  10   52.98   14.42
  -8  -5  10   52.05   19.27
   8   5  -9    0.13   19.56
  -8   5   9  -18.55   11.88
   8  -5  -9  -15.58   24.01
  -8  -5   9    2.96    7.93
  -8  -5   9   -2.87    9.87
   8   5  -8   12.54   13.26
  -8   5   8   29.33   21.04
   8  -5  -8   40.06   16.18
  -8  -5   8    9.61   12.44
  -8  -5   8   15.55   10.84
   8   5  -7   32.40   18.86
  -8   5   7    0.56   12.79
   8  -5  -7  -10.07   24.10
  -8  -5   7   11.19    8.63
  -8  -5   7   11.73   10.51
  -8   5   6   52.33   26.40
   8   5  -6  110.50   15.66
  -8  -5   6   96.89   13.53
  -8  -5   6   77.36   16.62
   8  -5  -6   66.51   20.26
  -8   5   5  106.74   19.24
   8   5  -5  122.46   23.06
  -8  -5   5  132.31   14.14
  -8  -5   5   96.08   12.84
   8  -5  -5  105.22   21.80
  -8   5   4   30.76   15.23
   8   5  -4   32.46   12.86
  -8  -5   4   60.23   17.66
  -8  -5   4   38.13   16.82
   8  -5  -4   51.00   16.23
  -8   5   3   41.44   13.61
   8   5  -3   14.68   11.05
  -8  -5   3   45.30   16.82
  -8  -5   3   -0.02    9.70
   8  -5  -3  -11.53   15.13
  -8   5   2    5.87   13.29
   8   5  -2   -0.82   15.79
  -8  -5   2    7.21   16.49
  -8  -5   2    5.01    9.87
   8  -5  -2   19.33   13.70
  -8   5   1    9.39   13.03
   8   5  -1   -6.97   15.51
  -8  -5   1   17.68   14.38
  -8  -5   1    8.50   14.39
   8  -5  -1  -16.69   21.11
  -8   5   0   38.26   14.78
   8   5   0    6.55   10.22
  -8  -5   0    8.24    9.80
  -8  -5   0    1.65   10.31
   8  -5   0   36.85   15.26
   8   5   1   65.80   12.43
  -8   5  -1   53.45   16.69
  -8  -5  -1   70.73   12.18
  -8   5  -2  285.31   26.63
   8   5   2  278.99   27.13
  -8  -5  -2  306.70   18.73
  -8  -5  -2  216.16   23.57
   8  -5   2  306.39   25.85
  -8  -5  -3   12.46    9.99
  -8  -5  -3    8.80   11.90
  -8   5  -4   92.12   19.30
   8   5   4   74.11   12.65
  -8  -5  -4   95.53   12.48
  -8  -5  -4  104.11   24.06
   8  -5   4   89.03   17.20
  -8   5  -5   84.46   20.19
   8   5   5  105.53   13.47
  -8  -5  -5  131.62   18.86
  -8  -5  -5  135.10   18.37
   8  -5   5  147.15   19.24
  -8   5  -6   98.09   31.83
   8   5   6  115.04   20.56
  -8  -5  -6  147.59   13.53
  -8  -5  -6  124.17   19.66
   8  -5   6  182.81   19.90
  -8   5  -7  102.11   19.78
   8   5   7   72.56   18.69
  -8  -5  -7   91.44   12.27
  -8  -5  -7   59.80   25.80
   8  -5   7  118.83   16.38
  -8   5  -8  -26.84   23.99
   8   5   8  -13.34    8.55
  -8  -5  -8    5.73    8.95
  -8  -5  -8  -11.89   12.49
   8  -5   8  -20.58   19.55
  -8   5  -9   39.64   15.05
   8   5   9    5.10    8.30
  -8  -5  -9    0.74   14.44
  -8  -5  -9    4.04   19.97
   8  -5   9   13.30   12.24
  -8   5 -10   -0.53   15.06
   8  -5  10    1.26   17.37
  -8  -5 -10    2.89   12.73
  -8  -5 -10   -0.27    7.89
  -8   5 -11   23.68   26.80
   8  -5  11   14.16   13.34
  -8  -5 -11   21.06   21.83
  -8  -5 -11   44.50    9.30
  -8   5 -12   29.04   17.09
   8  -5  12  -15.38   17.35
  -8  -5 -12    3.99   12.78
  -8  -5 -12   14.05   12.89
  -8   5 -13   19.69   17.41
  -8  -5 -13   10.20   12.44
   8  -5  13   13.99   12.27
  -8  -5 -13   19.53   13.61
  -8   5 -14   42.18   29.84
  -8  -5 -14   40.56    9.19
   8  -5  14   44.69   18.54
  -8  -5 -14   42.69   23.17
  -8   5 -15   29.16   20.69
  -8  -5 -15   55.23   14.28
   8  -5  15   40.94   13.21
  -8  -5 -15   37.82   16.29
  -8   5 -16   47.68   24.86
  -8  -5 -16   89.39    9.53
   8  -5  16   53.09   20.64
  -8  -5 -16   67.43   26.84
  -8   5 -17    8.70   21.08
  -8  -5 -17   29.15    8.11
   8  -5  17   29.83   12.06
  -8  -5 -17    2.99   23.26
   8   6 -14    6.22   18.90
  -8   6  14   17.08   14.18
   8  -6 -14   -6.78   21.75
  -8  -6  14    6.89    9.76
  -8  -6  14   -0.17   21.88
   8   6 -13   63.34   31.29
  -8   6  13   15.59   25.60
   8  -6 -13   75.17   35.03
  -8  -6  13   29.73   18.69
  -8  -6  13   33.90   15.91
   8   6 -12   29.77   28.79
  -8   6  12   13.15   15.86
   8  -6 -12   31.55   21.68
  -8  -6  12   16.00   11.25
  -8  -6  12   36.51   14.24
   8   6 -11   17.38   16.66
  -8   6  11   -0.01   22.30
   8  -6 -11    0.98   19.43
  -8  -6  11   14.47   16.81
  -8  -6  11    1.08   12.68
   8   6 -10   53.70   27.34
  -8   6  10   23.82   16.27
   8  -6 -10    1.88   32.28
  -8  -6  10   29.67   11.78
  -8  -6  10   26.23   14.46
  -8   6   9   33.31   15.78
   8   6  -9   25.06   17.85
  -8  -6   9   24.89   14.07
  -8  -6   9   35.18   17.56
   8  -6  -9   53.79   21.28
  -8   6   8    2.20   16.41
   8   6  -8   15.77   24.39
  -8  -6   8   26.01   12.66
  -8  -6   8    1.28   12.03
   8  -6  -8   31.29   20.04
  -8   6   7  111.30   21.72
   8   6  -7  142.21   21.76
  -8  -6   7  153.50   18.05
  -8  -6   7   95.38   24.33
   8  -6  -7  100.32   38.45
   8   6  -6    5.12   23.40
  -8   6   6  -14.59   26.02
   8  -6  -6  -57.70   20.50
  -8  -6   6   -3.45   12.12
  -8   6   5   66.25   20.08
   8   6  -5   86.36   18.52
  -8  -6   5  106.32   15.51
  -8  -6   5   47.37   15.63
   8  -6  -5   85.44   22.52
  -8   6   4   -6.01   26.44
   8   6  -4   -1.40   23.07
  -8  -6   4   27.55   12.69
  -8  -6   4   13.01   13.12
   8  -6  -4   13.70   18.16
  -8   6   3   38.76   17.35
   8   6  -3   13.22   14.47
  -8  -6   3   32.81   13.04
  -8  -6   3   31.91   13.33
   8  -6  -3   12.78   18.60
  -8   6   2   20.59   24.06
   8   6  -2  -15.36   19.79
  -8  -6   2    3.65   12.11
  -8  -6   2    1.08   13.14
   8  -6  -2   22.12   25.93
  -8   6   1   17.65   17.14
   8   6  -1   24.07   13.99
  -8  -6   1   24.76   13.26
  -8  -6   1   33.80   13.69
   8  -6  -1    0.22   18.03
   8   6   0  138.71   29.15
  -8   6   0  163.74   36.90
   8  -6   0  146.96   35.69
  -8  -6   0  120.85   21.59
  -8   6  -1  205.18   28.51
   8   6   1  206.42   33.15
  -8  -6  -1  262.76   28.16
  -8  -6  -1  213.73   24.90
   8  -6   1  226.60   27.63
   8   6   2    5.39   11.90
  -8  -6  -2   -2.71   10.67
  -8  -6  -2   -3.37   13.99
  -8   6  -3  -37.31   24.71
   8   6   3   11.57   17.36
  -8  -6  -3    6.44   10.59
  -8  -6  -3  -21.38   21.04
   8  -6   3    2.40   15.01
  -8   6  -4   -5.71   16.92
   8   6   4    8.58   12.63
  -8  -6  -4   17.99   11.32
  -8  -6  -4   12.73   15.49
   8  -6   4   44.52   24.85
  -8   6  -5   32.52   26.34
   8   6   5   15.02   12.16
  -8  -6  -5   22.09   11.80
  -8  -6  -5   21.48   24.15
   8  -6   5   -0.05   15.93
  -8   6  -6    6.34   18.35
   8   6   6   30.90   18.73
  -8  -6  -6   22.07   17.93
  -8  -6  -6   11.55   17.08
   8  -6   6   13.47   24.55
  -8   6  -7   23.49   17.83
   8   6   7   21.91   11.57
  -8  -6  -7   19.63   16.29
  -8  -6  -7   10.19   17.05
   8  -6   7  -15.01   15.73
  -8   6  -8   23.11   27.42
   8   6   8    9.34   16.41
  -8  -6  -8    2.50   10.63
  -8  -6  -8   22.70   24.57
   8  -6   8   16.05   23.82
  -8   6  -9  -13.03   18.43
   8   6   9    5.48   10.80
  -8  -6  -9   10.35   10.39
  -8  -6  -9    9.72   15.73
   8  -6   9   -0.28   15.05
  -8   6 -10   49.59   22.57
   8   6  10   41.76   12.93
  -8  -6 -10   88.23   13.19
  -8  -6 -10   58.57   29.59
   8  -6  10   56.77   28.33
  -8   6 -11    7.95   33.10
   8  -6  11   21.19   15.76
  -8  -6 -11   30.02   18.14
  -8  -6 -11   41.40   16.16
  -8   6 -12   11.73   19.81
   8  -6  12    7.41   21.93
  -8  -6 -12    9.54   23.83
  -8  -6 -12   -3.69    9.33
  -8   6 -13    7.30   20.16
  -8  -6 -13   -7.66   24.18
   8   7  -2   -4.48   27.13
   8  -7  -2   16.63   33.67
  -8  -7   2   32.83   25.78
  -8   7   1   26.38   29.37
   8  -7  -1    8.69   19.71
  -8  -7   1   14.31   16.65
  -8  -7   1   -1.32   14.39
   8  -7   0   17.41   20.03
  -8  -7   0   -5.79   26.54
   9   0 -26    7.71   11.05
   9   0 -26   -0.75   22.31
   9   0 -25   10.63   10.83
   9   0 -25   34.44   21.70
   9   0 -24   15.01   15.17
   9   0 -24   -5.14   18.01
   9   0 -23   76.04   15.91
   9   0 -23   90.52   21.32
   9   0 -22    5.85    7.64
   9   0 -22   -5.63   10.06
   9   0 -21   20.33    7.85
   9   0 -21   22.94   10.35
   9   0 -20    8.61    6.87
   9   0 -20    4.67    9.39
   9   0 -19  140.68   15.33
   9   0 -19  148.73   13.76
   9   0 -18    2.09    7.26
   9   0 -18  -15.67    8.70
   9   0 -18  -11.07    8.03
   9   0 -17    3.63    6.85
   9   0 -17    6.09    5.21
   9   0 -17   11.34    7.76
   9   0 -16   -0.40    6.95
   9   0 -16   -2.20    4.87
   9   0 -16   -5.35    7.16
   9   0 -15   20.00    7.22
   9   0 -15   11.93    4.94
   9   0 -15    8.98    7.27
   9   0 -14    0.79    4.25
   9   0 -14    6.41    6.89
   9   0 -14    5.38   10.25
   9   0 -13  911.34   30.73
   9   0 -13  956.18   31.08
   9   0 -13  938.74   39.24
   9   0 -12   -0.56    4.08
   9   0 -12   -6.57    5.37
   9   0 -12   -1.77    9.71
   9   0 -11  266.90    9.47
   9   0 -11  261.48    7.95
   9   0 -11  296.07   12.37
   9   0 -10    9.28    4.07
   9   0 -10    0.78    2.93
   9   0 -10    5.07    5.25
   9   0  -9  300.24    7.78
   9   0  -9  332.36   16.59
   9   0  -8    0.49    3.90
   9   0  -8   -3.92    2.38
   9   0  -8    5.00    4.60
   9   0  -7  118.91    9.34
   9   0  -7  107.52    5.16
   9   0  -7  104.46    9.75
   9   0  -6   -2.08    3.98
   9   0  -6   -1.25    2.87
   9   0  -6   -1.71    5.75
   9   0  -5   16.28    4.19
   9   0  -5    6.01    2.55
   9   0  -5    6.90    6.02
   9   0  -4    4.12    4.03
   9   0  -4    0.19    1.91
   9   0  -4   -3.83    4.50
   9   0  -3  210.05   10.89
   9   0  -3  234.30    4.65
   9   0  -3  233.61    8.39
   9   0  -2    3.69    3.97
   9   0  -2    2.11    1.24
   9   0  -2    5.17    2.88
   9   0  -1   18.72    4.42
   9   0  -1   11.91    2.28
   9   0   0    2.21    4.10
   9   0   1 1257.97   34.92
   9   0   2   -3.07    4.60
   9   0   3  487.67   14.82
   9   0   4   -0.17    4.52
  -9   0  -4    0.61    1.47
  -9   0  -4    0.53    1.39
   9   0   5  283.61   10.52
  -9   0  -5  301.61    8.29
   9   0   6   -2.06    4.44
  -9   0  -6   -0.75    3.97
   9   0   7  217.47    8.90
  -9   0  -7  221.52    9.52
   9   0   8    0.09    4.47
  -9   0  -8   -0.90    5.70
   9   0   9 1650.97   50.47
  -9   0  -9 1733.63   57.99
   9   0  10    5.52    4.59
  -9   0 -10   -0.36    4.46
   9   0  11   69.38    8.83
  -9   0 -11   77.82    9.38
   9   0  12    1.20    7.65
  -9   0 -12   -1.79    5.04
   9   0  13   47.43    5.96
  -9   0 -13   36.39    9.63
   9   0  14   -0.35    4.67
  -9   0 -14   -0.37    5.67
   9   0  15    3.88    4.90
  -9   0 -15   14.06    6.45
   9   0  16   -2.38    7.41
  -9   0 -16   -0.87    6.69
   9   0  17  117.05   11.58
  -9   0 -17  120.55   16.00
   9   0  18    4.30    5.33
  -9   0 -18    3.10   12.24
   9   0  19  278.02   16.49
  -9   0 -19  307.85   23.91
   9   0  20  -11.36    9.61
  -9   0 -20   -8.12   14.15
   9   0  21   87.46    8.31
  -9   0 -21   99.64   19.06
   9   0  22   -2.27    8.84
  -9   0 -22   -9.00   15.69
   9   0  23   99.54    9.53
  -9   0 -23  122.91   22.17
   9   0  24   -2.42    9.43
  -9   0 -24   -0.77   11.33
   9   1 -26   78.73   23.49
   9  -1 -26   40.37   10.92
   9  -1 -26   31.22   18.25
   9   1 -25   58.33   19.55
   9  -1 -25   27.13    9.87
   9  -1 -25   38.90   17.07
   9   1 -24   22.74   17.87
   9  -1 -24   29.49    9.02
   9  -1 -24   47.40   15.57
   9   1 -23   17.04   11.16
   9  -1 -23   23.64   13.29
   9  -1 -23   54.95   14.43
   9   1 -22   15.74    9.92
   9  -1 -22    9.85    6.87
   9  -1 -22    0.65   13.19
   9   1 -21   34.52    9.87
   9  -1 -21   23.62    7.11
   9  -1 -21    7.26   13.32
   9   1 -20   28.94    9.08
   9  -1 -20   26.66    6.84
   9  -1 -20   24.99    5.73
   9  -1 -20   13.82   12.52
   9   1 -19  176.39   13.37
   9  -1 -19  163.70   13.65
   9  -1 -19  179.07    9.14
   9  -1 -19  187.18   17.24
   9   1 -18  133.98   11.02
   9  -1 -18  116.55    8.25
   9  -1 -18  121.86    6.05
   9  -1 -18  131.69   14.67
   9   1 -17   16.99    7.02
   9  -1 -17   11.40    4.90
   9  -1 -17    8.83    3.73
   9  -1 -17    9.76   15.02
   9   1 -16    8.91    6.87
   9  -1 -16   24.22    7.69
   9  -1 -16   12.32    3.47
   9  -1 -16    4.62   14.15
   9   1 -15  336.48   19.51
   9   1 -15  339.06   14.15
   9  -1 -15  298.73   10.85
   9  -1 -15  311.03   11.26
   9  -1 -15  355.05   27.88
   9   1 -14  136.49    9.51
   9   1 -14  155.93    9.07
   9  -1 -14  135.76    7.04
   9  -1 -14  148.75    8.42
   9  -1 -14  156.58   13.52
   9   1 -13   35.43    9.92
   9   1 -13   45.18    6.29
   9  -1 -13   36.93    7.44
   9  -1 -13   47.94    4.24
   9  -1 -13   27.00    9.86
   9   1 -12 1102.51   37.32
   9   1 -12 1173.05   34.70
   9  -1 -12 1036.85   28.99
   9  -1 -12 1109.35   31.32
   9  -1 -12 1068.86   51.55
   9   1 -11   46.99    9.69
   9   1 -11   50.24    5.34
   9  -1 -11   43.82    4.53
   9  -1 -11   43.56    4.27
   9  -1 -11   36.07   13.95
   9   1 -10  388.67   15.33
   9   1 -10  390.02   12.32
   9  -1 -10  411.90   14.14
   9  -1 -10  366.69   17.91
   9   1  -9    8.77    8.23
   9   1  -9   11.52    5.97
   9  -1  -9    7.96    3.78
   9  -1  -9   20.76   11.28
  -9  -1   9   12.49    4.05
   9   1  -8  186.44   10.21
   9   1  -8  215.81    7.70
   9  -1  -8  213.72    7.61
   9  -1  -8  194.19   16.54
  -9  -1   8  198.87    7.71
   9   1  -7   92.69   11.11
   9   1  -7   86.19    6.63
   9  -1  -7   85.53    7.53
   9  -1  -7   72.15    8.38
  -9  -1   7   86.29    5.56
   9   1  -6   40.33    9.01
   9   1  -6   38.91    3.67
   9  -1  -6   47.23    4.60
   9  -1  -6   35.89    6.92
  -9  -1   6   44.71    4.89
   9   1  -5   99.31    7.85
   9   1  -5  117.03    4.57
   9  -1  -5  120.31    6.04
   9  -1  -5  108.41    7.67
  -9  -1   5  113.16    6.13
   9   1  -4  290.62   11.70
   9   1  -4  273.47    5.67
   9  -1  -4  256.37   11.01
  -9  -1   4  272.00    9.43
   9   1  -3  437.06   20.35
   9   1  -3  442.81    9.94
   9   1  -3  456.88    9.23
   9  -1  -3  411.51   18.20
  -9  -1   3  426.53   12.65
   9   1  -2   23.84    8.37
  -9   1   2   15.89    5.46
  -9  -1   2   24.18    4.66
   9  -1  -2   28.62    4.70
   9   1  -1   27.28    5.79
  -9   1   1   26.28    3.78
  -9  -1   1   40.58    4.87
   9  -1  -1   37.30    4.40
   9   1   0    1.73    5.24
  -9   1   0    7.00    5.17
   9  -1   0   10.31    5.50
   9   1   1   24.25    5.93
  -9   1  -1   23.95    6.26
   9  -1   1   27.71    5.37
   9   1   2  200.66    9.38
  -9   1  -2  172.63   10.50
   9  -1   2  172.13    8.17
   9   1   3    6.15    5.27
  -9   1  -3    3.28    4.09
   9  -1   3    6.84    4.51
   9   1   4   20.47    6.01
  -9   1  -4   21.29    7.02
   9  -1   4   24.21    4.54
   9   1   5  206.30    9.84
  -9   1  -5  176.56   12.46
   9  -1   5  178.84    6.02
   9   1   6  800.36   26.01
  -9   1  -6  747.30   31.85
  -9  -1  -6  795.37   15.09
   9  -1   6  786.18   19.78
  -9  -1  -6  862.02   17.85
   9   1   7  158.43    9.18
  -9   1  -7  139.60   12.26
  -9  -1  -7  153.95    5.28
   9  -1   7  153.33    5.42
  -9  -1  -7  169.77    6.35
   9   1   8  290.46   12.14
  -9   1  -8  253.95   11.96
  -9  -1  -8  291.62    8.97
   9  -1   8  269.51    7.55
  -9  -1  -8  264.07    9.31
   9   1   9    5.41    5.33
  -9   1  -9   19.07    8.88
  -9  -1  -9    2.93    3.95
   9  -1   9    0.27    4.08
  -9  -1  -9   -1.30    4.93
   9   1  10   28.41    6.00
  -9   1 -10   30.11   10.36
  -9  -1 -10   23.71    3.46
   9  -1  10   26.87    3.25
  -9  -1 -10   22.50    6.37
   9   1  11  101.84    8.06
  -9   1 -11  101.87    9.93
   9  -1  11  111.77    7.04
  -9  -1 -11  108.75    7.81
   9  -1  11  108.74    6.75
  -9  -1 -11  107.12    6.14
   9   1  12  480.94   17.02
  -9   1 -12  443.55   26.32
   9  -1  12  486.76   15.66
  -9  -1 -12  451.60   16.27
   9  -1  12  509.65   13.39
  -9  -1 -12  471.08   19.46
   9   1  13   18.74    8.74
  -9   1 -13   14.94    7.86
   9  -1  13   18.22    5.09
  -9  -1 -13   26.04    6.54
   9  -1  13   23.09    5.50
  -9  -1 -13   18.97    7.45
   9   1  14   22.87   10.09
  -9   1 -14   30.82   13.38
   9  -1  14   39.07    7.90
  -9  -1 -14   35.94    7.56
   9  -1  14   32.59    4.14
  -9  -1 -14   29.83    8.49
   9   1  15   13.17    6.51
  -9   1 -15   18.61   13.08
   9  -1  15   26.98    8.11
  -9  -1 -15    7.13    7.71
   9  -1  15   12.49    6.34
  -9  -1 -15   20.88    5.66
   9   1  16  115.70    9.00
  -9   1 -16  111.04   12.30
   9  -1  16  134.86    7.53
  -9  -1 -16  106.25   11.24
   9  -1  16  120.47    6.91
  -9  -1 -16  105.41    8.73
   9   1  17   38.74   10.23
  -9   1 -17   24.89   10.28
   9  -1  17   33.47    5.88
  -9  -1 -17   35.43    9.42
   9  -1  17   33.89    5.47
  -9  -1 -17   32.51    7.26
   9   1  18   64.21   12.63
  -9   1 -18   58.86   12.19
  -9  -1 -18   65.42   11.36
   9  -1  18   76.72    9.94
  -9  -1 -18   58.82    8.53
   9   1  19  400.00   18.75
  -9   1 -19  411.60   34.43
  -9  -1 -19  345.17   22.38
   9  -1  19  432.25   15.81
  -9  -1 -19  392.46   18.80
   9   1  20   23.17    7.68
  -9   1 -20   26.27   18.37
  -9  -1 -20   39.94   13.07
   9  -1  20   30.20    6.08
  -9  -1 -20   40.80    8.52
   9   1  21   38.99   13.15
  -9   1 -21   27.82   19.49
  -9  -1 -21   55.37   14.38
   9  -1  21   52.83   10.28
  -9  -1 -21   43.84    9.79
   9   1  22   11.39    7.89
  -9   1 -22   40.62   19.06
  -9  -1 -22   27.11    9.45
   9  -1  22   26.23    6.28
  -9  -1 -22   23.34    9.37
   9   1  23   32.08   12.23
  -9   1 -23   28.20   20.64
  -9  -1 -23   39.15   10.20
   9  -1  23   25.41    9.54
  -9  -1 -23   31.55   15.43
   9   1  24   21.84    8.26
  -9   1 -24   45.27   21.35
  -9  -1 -24   22.98   10.98
   9  -1  24   26.83    6.86
  -9  -1 -24   28.71   16.15
   9   2 -25  160.28   20.79
   9  -2 -25  145.85   19.25
   9  -2 -25  182.05   25.93
   9   2 -24    9.40   13.55
   9  -2 -24   26.61   11.83
   9  -2 -24   19.00   16.83
   9   2 -23   27.38   13.08
   9  -2 -23   19.54    7.98
   9  -2 -23   56.77   17.26
   9   2 -22   35.56   13.09
   9  -2 -22   29.19    7.86
   9  -2 -22   51.17   16.38
   9   2 -21   21.00   11.15
   9  -2 -21   -3.63   10.11
   9  -2 -21   28.58   14.47
   9   2 -20   37.63   11.45
   9  -2 -20   32.32    7.19
   9  -2 -20   26.67    5.06
   9  -2 -20   47.73   15.25
   9   2 -19    6.35    9.80
   9  -2 -19   16.58    5.98
   9  -2 -19    7.85    4.43
   9  -2 -19   12.67   13.55
  -9  -2  19   13.40    3.69
   9   2 -18  -13.38    8.99
   9  -2 -18  -20.37    8.95
   9  -2 -18   -0.39    4.43
   9  -2 -18  -19.12   12.53
  -9  -2  18   -3.31    5.45
   9   2 -17   86.72   11.16
   9  -2 -17   98.41    7.70
   9  -2 -17   81.28    6.19
   9  -2 -17   96.26   22.85
  -9  -2  17   81.42    7.93
   9   2 -16   18.20   12.91
   9  -2 -16   15.33    5.33
   9  -2 -16   13.10   18.74
  -9  -2  16   18.62    4.28
   9   2 -15  900.77   43.32
   9  -2 -15  831.09   21.68
   9  -2 -15  777.94   40.60
  -9  -2  15  815.44   27.74
   9   2 -14  355.90   23.26
   9  -2 -14  312.76   11.82
   9  -2 -14  326.74   21.90
  -9  -2  14  319.94   14.83
   9   2 -13   17.70    7.68
   9  -2 -13   15.09    3.86
   9  -2 -13   19.48   16.36
  -9  -2  13   13.73    4.60
  -9  -2  13   18.05    4.28
   9   2 -12   11.63    6.93
   9  -2 -12   17.41   15.90
  -9  -2  12   11.72    4.55
  -9  -2  12    9.99    3.83
   9   2 -11  296.30   16.34
   9   2 -11  335.32   20.24
   9  -2 -11  321.66   19.93
  -9  -2  11  297.22   11.04
  -9  -2  11  321.43    9.32
   9   2 -10   12.66   11.48
   9   2 -10   -6.64    5.89
   9  -2 -10    3.49   14.68
  -9  -2  10    9.25    4.60
  -9  -2  10    4.88    4.82
   9   2  -9 1064.35   40.41
   9   2  -9 1130.46   42.21
   9  -2  -9 1021.18   45.49
[truncated: 172,180 more chars]
